# Supplementary material for: Reference intervals for the urinary steroid metabolome: The impact of sex, age, day and night time on human adult steroidogenesis
Source: PubMed Central journal article supplement (PMC6440635; doi:10.1371/journal.pone.0214549), 2019-03-29

**Supporting Figure 1. Calibration curves.** Calibration curves are shown for all analytes injected on column in the range from 39 to 20000 fmol. Crosses indicate data points, the solid line represents the linear regression curve and the dotted lines the 95% confidence interval. Axes are plotted in logarithmic scale (base 10).

### Progesterones

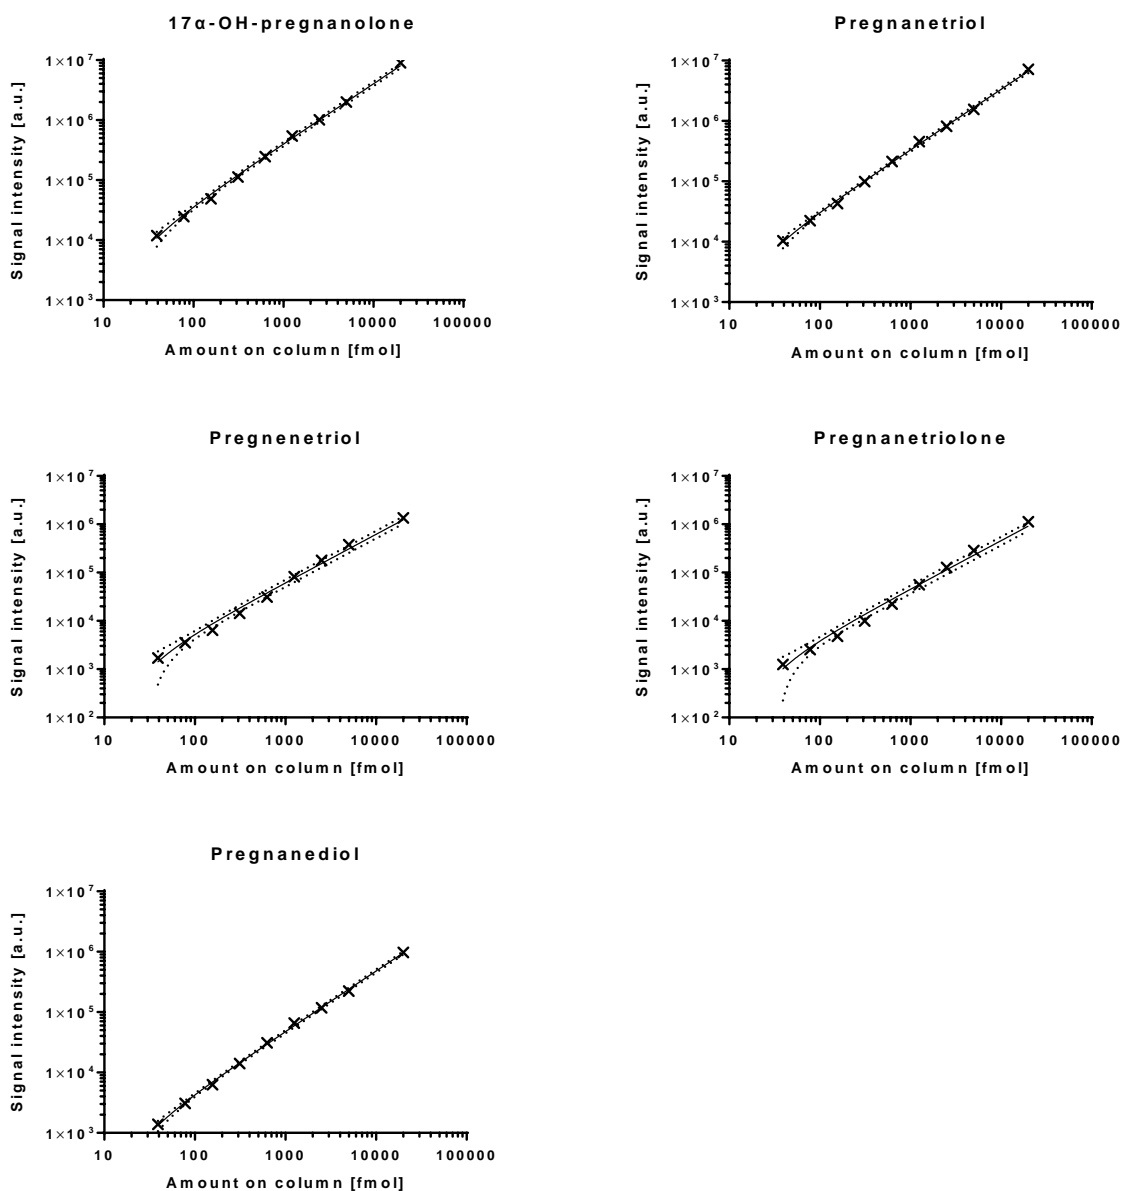

# Androgens

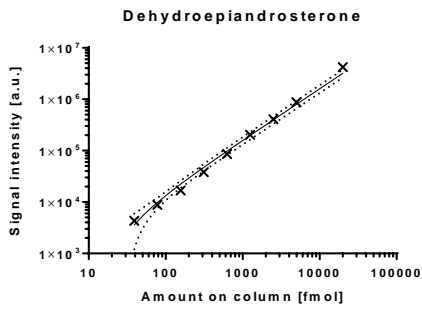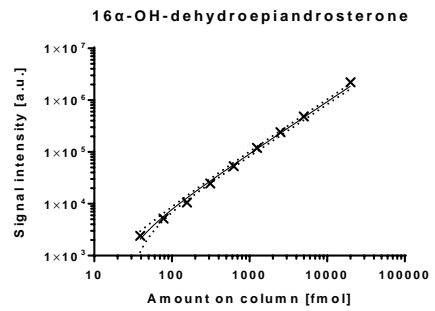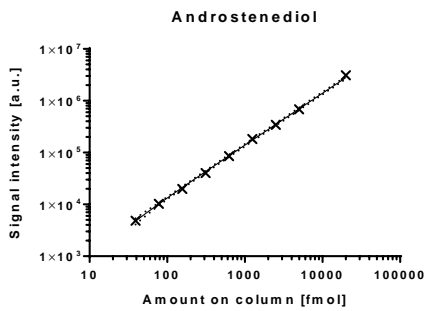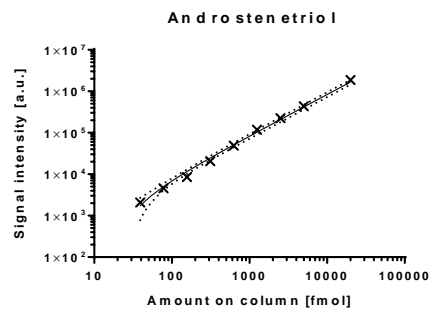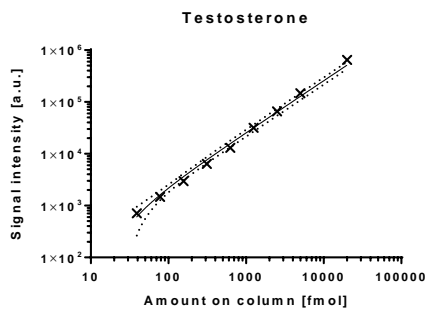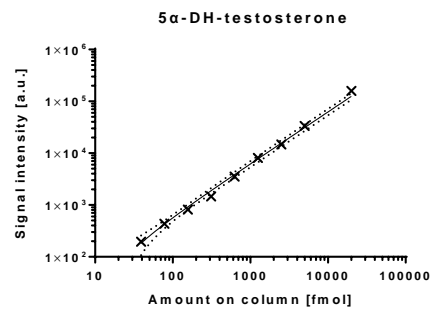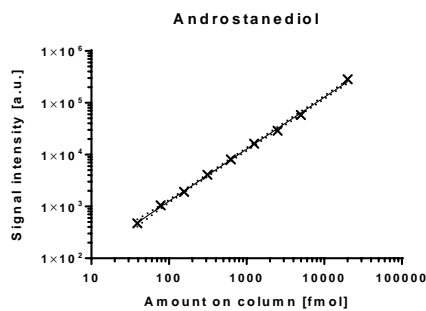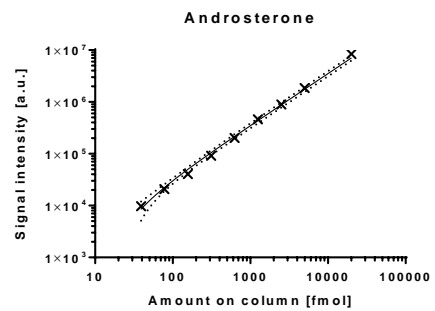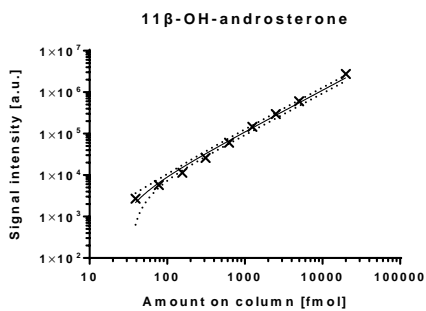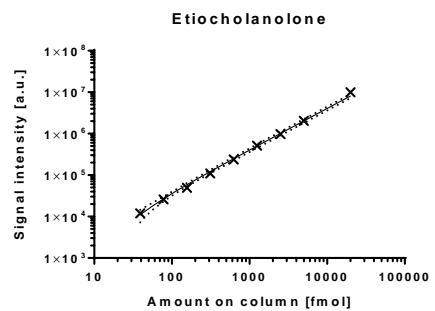

# Estrogens

## 17 $\beta$ -estradiol

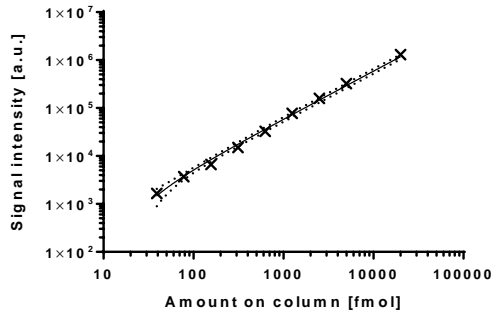

## Estriol

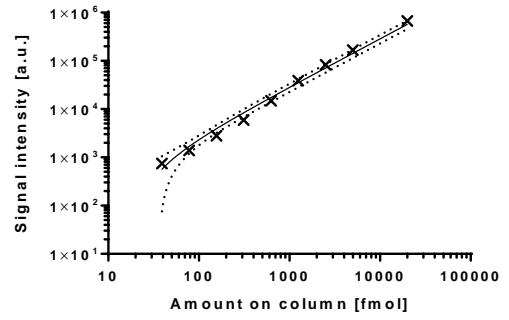

## Corticosterones

TH-11-deoxycorticosterone

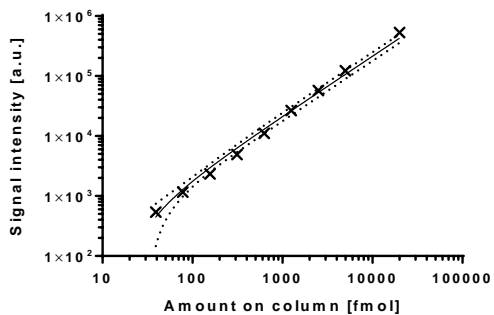

TH-11-dehydrocorticosterone

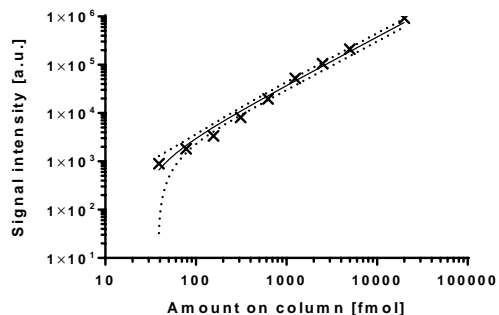

18-OH-TH-11-dehydrocorticosterone

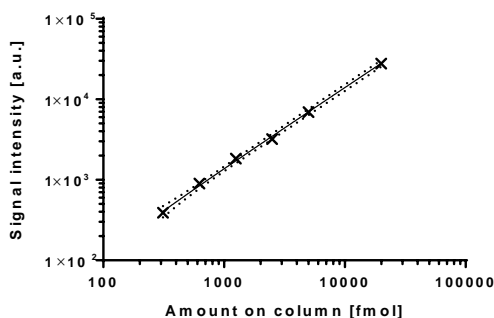

TH-corticosterone

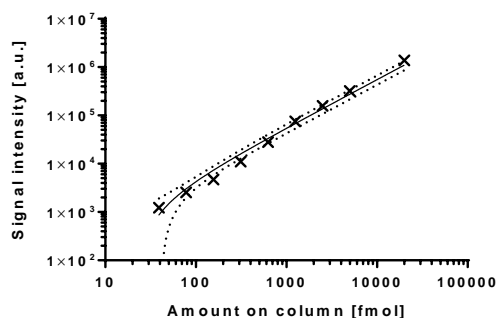

5 $\alpha$ -TH-corticosterone

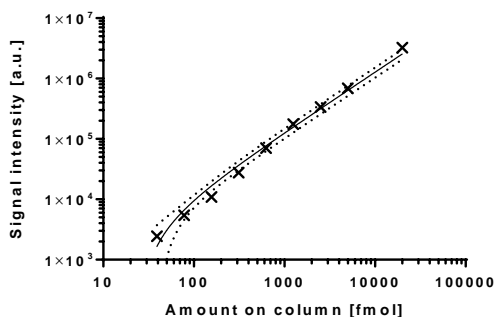

## Mineralocorticoids

TH-aldosterone

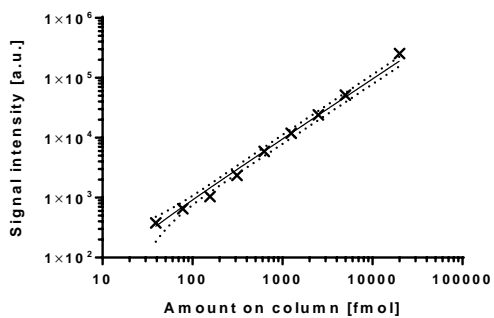

TH-11-deoxycortisol

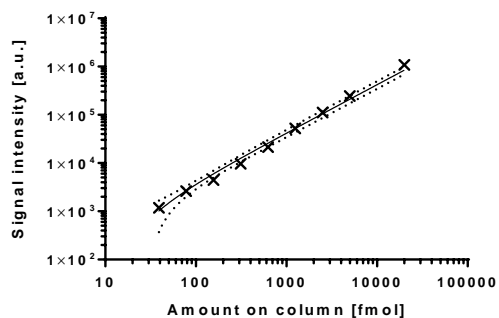

# Glucocorticoids

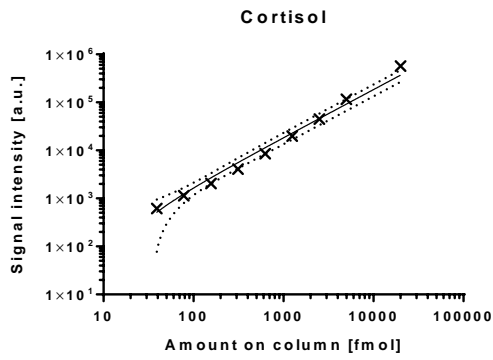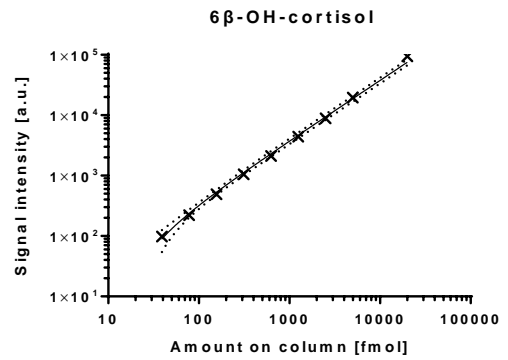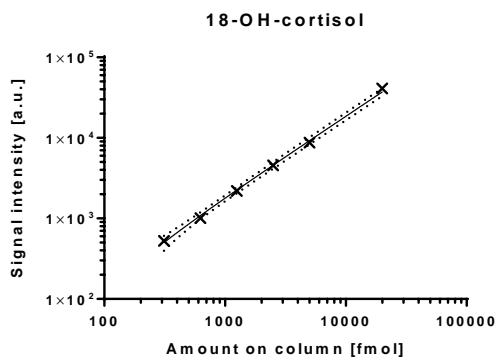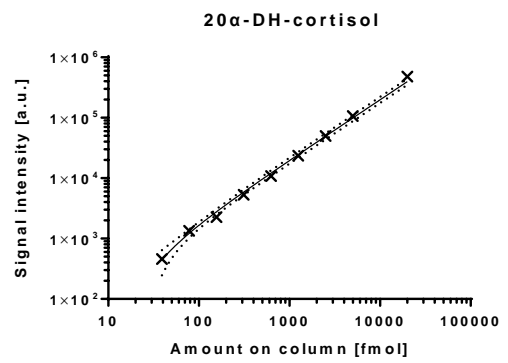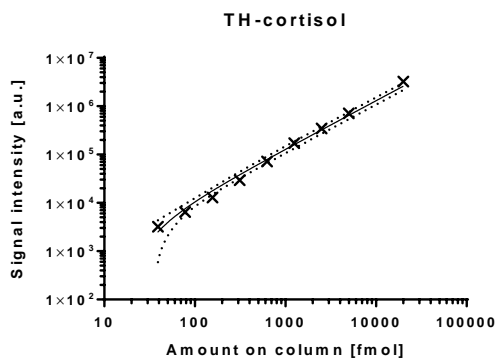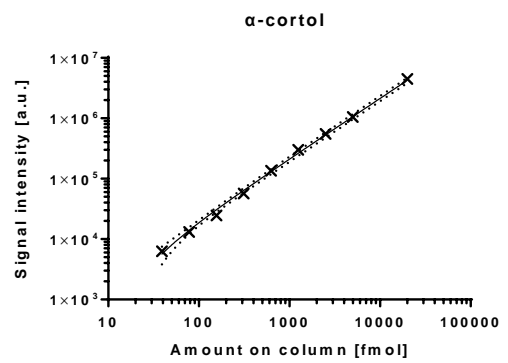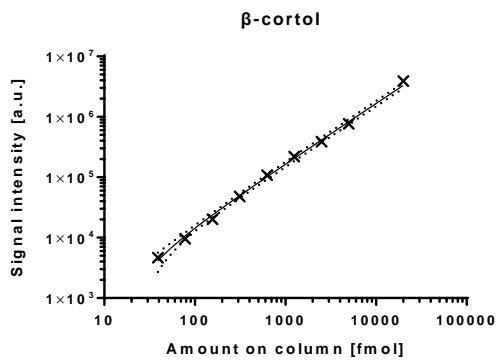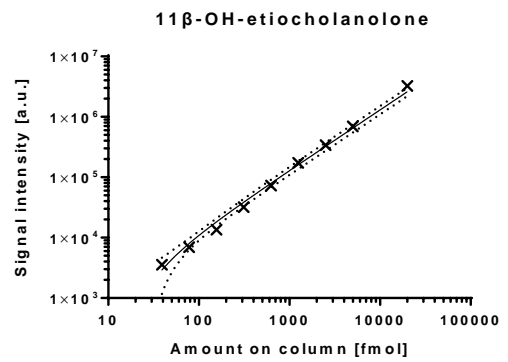

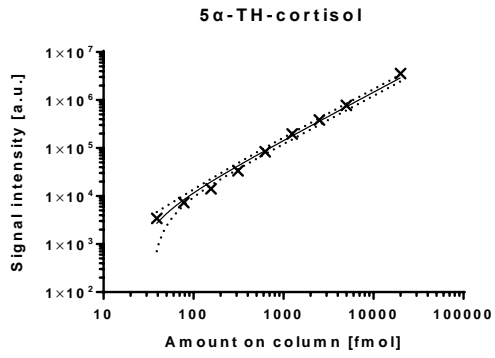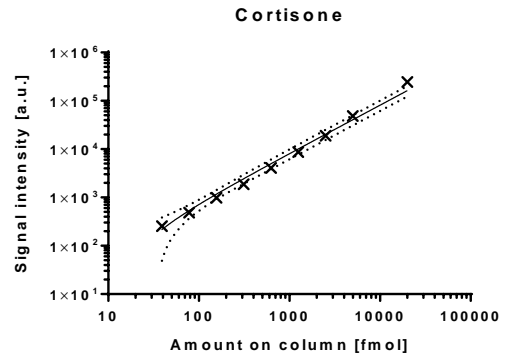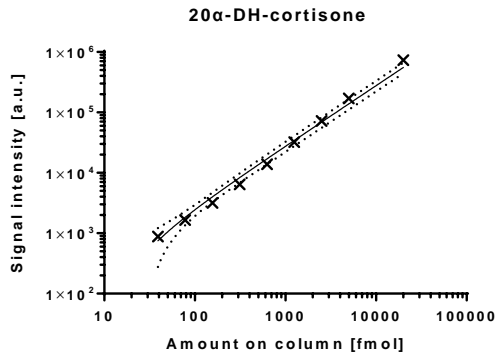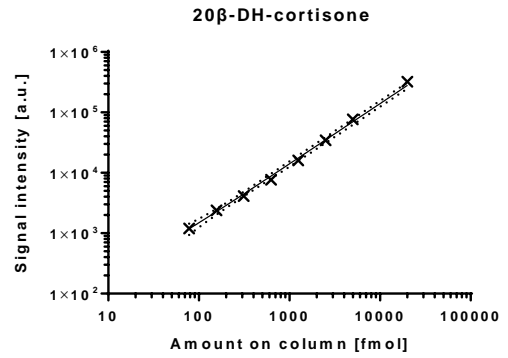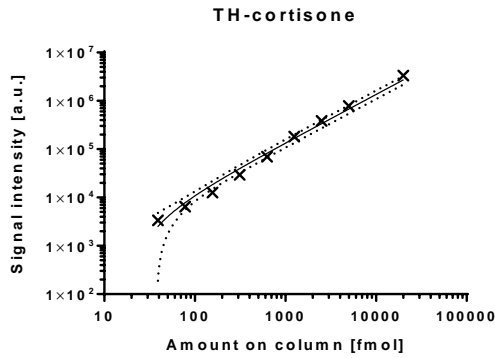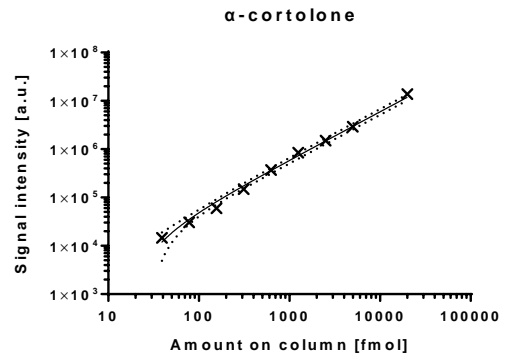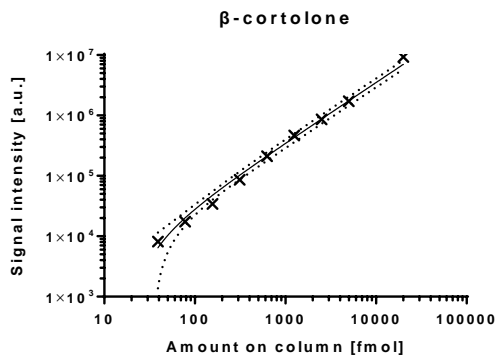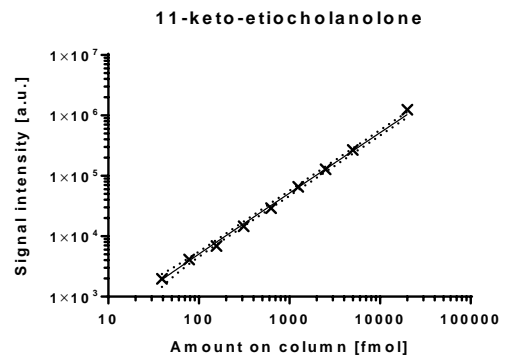

Supplement: pone.0214549.s001.pdf [file pone.0214549.s001.pdf]
