# Supplementary material for: Reference intervals for the urinary steroid metabolome: The impact of sex, age, day and night time on human adult steroidogenesis
Source: PubMed Central journal article supplement (PMC6440635; doi:10.1371/journal.pone.0214549), 2019-03-29

**Supporting Figure 3. Descriptive analysis of steroid steroid compounds.** A descriptive analysis of the 40 steroid compounds measured in urine is shown including one steroid compound per page.

**Panel (a):** boxplots, steroid (log-scale) by sex;

**Panel (b):** Gasser-Müller nonparametric fits and scatter plots, steroid (log-scale) by age and by sex;

**Panels (c) and (d):** boxplots, transformed steroid for men and women according to optimal power transformation; outliers are plotted as black dots;

**Panels (e) and (f):** steroid (log-scale) by day and night time for men and women;

**Panels (g) and (h):** Spearman correlation of transformed steroid night vs day.

**Abbreviations used:**

M=men; W=women; D=day; N=night; TR=optimal power transformation; nout=number of outliers; sk=skewness; ku=kurtosis; delta=robust estimate of mean difference expressed in standard deviations; rho=Spearman correlation coefficient; n=sample size.

(a) M vs W: delta= 1.67 p = 0

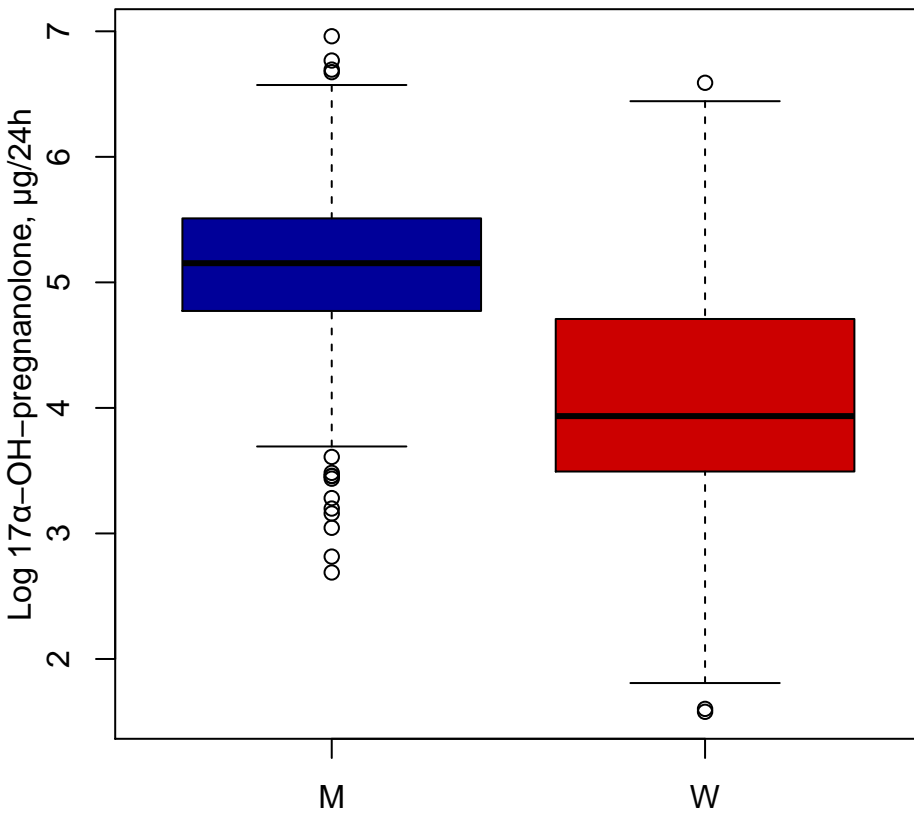

(b) M: p = 0 W: p = 0

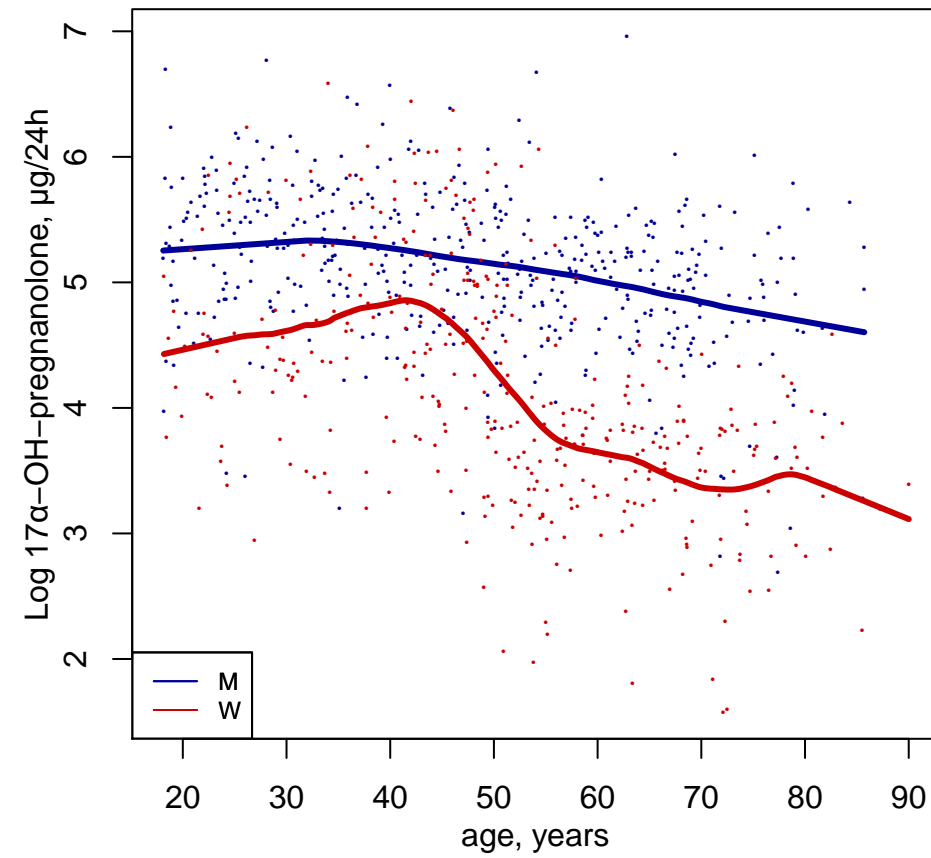

(c) TR= 0.2 nout= 1 sk= -0.06 ku= 0.88

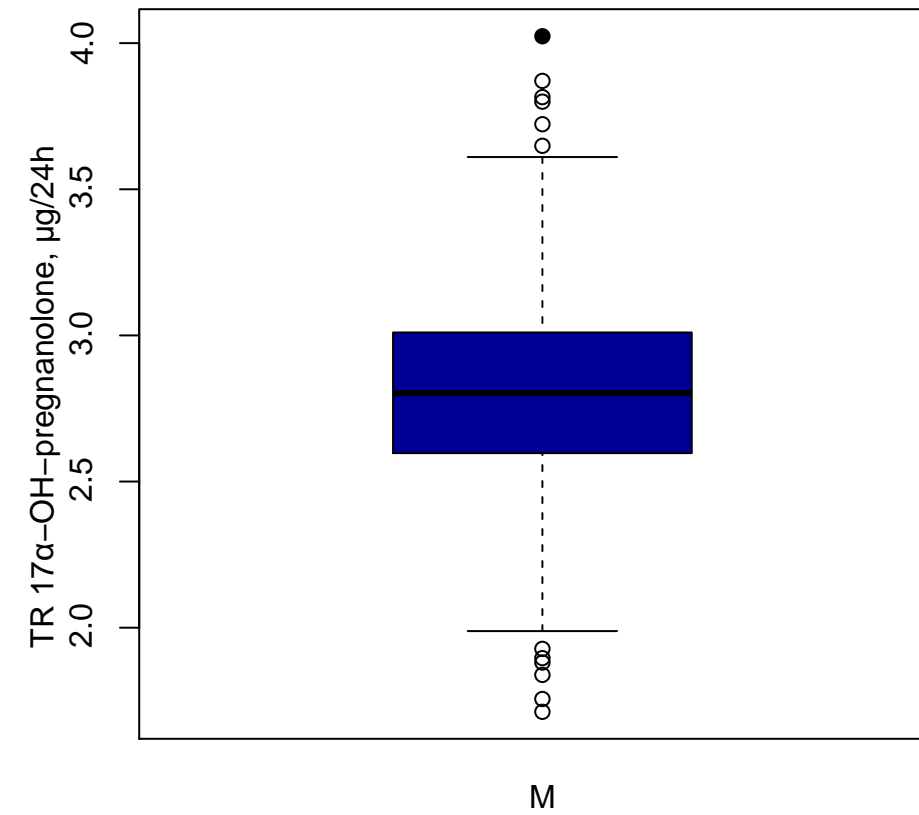

(d) TR= -0.1 nout= 0 sk= -0.01 ku= 0.88

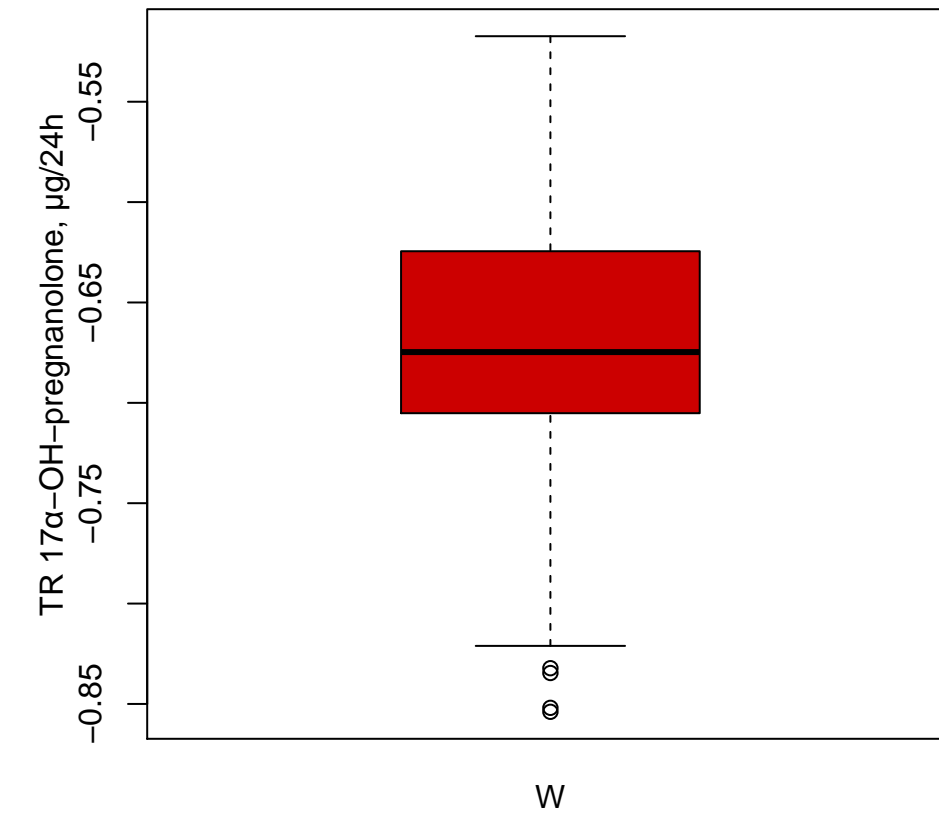

(e) D vs N: delta= 0.1 p = 0.013

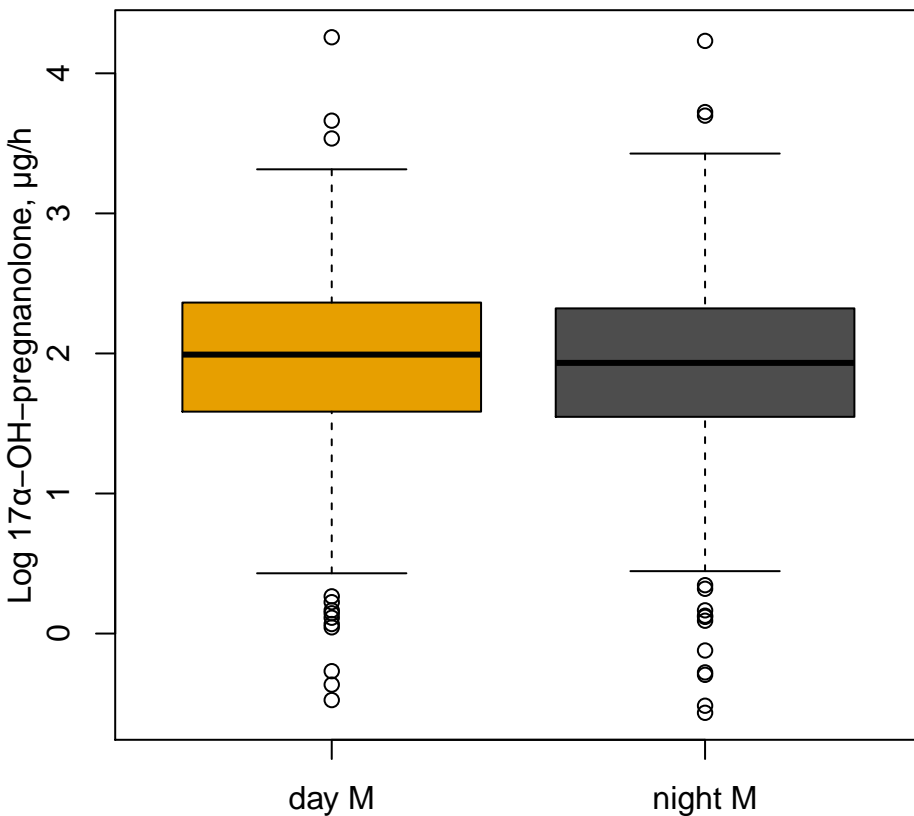

(f) D vs N: delta= 0.31 p = 0

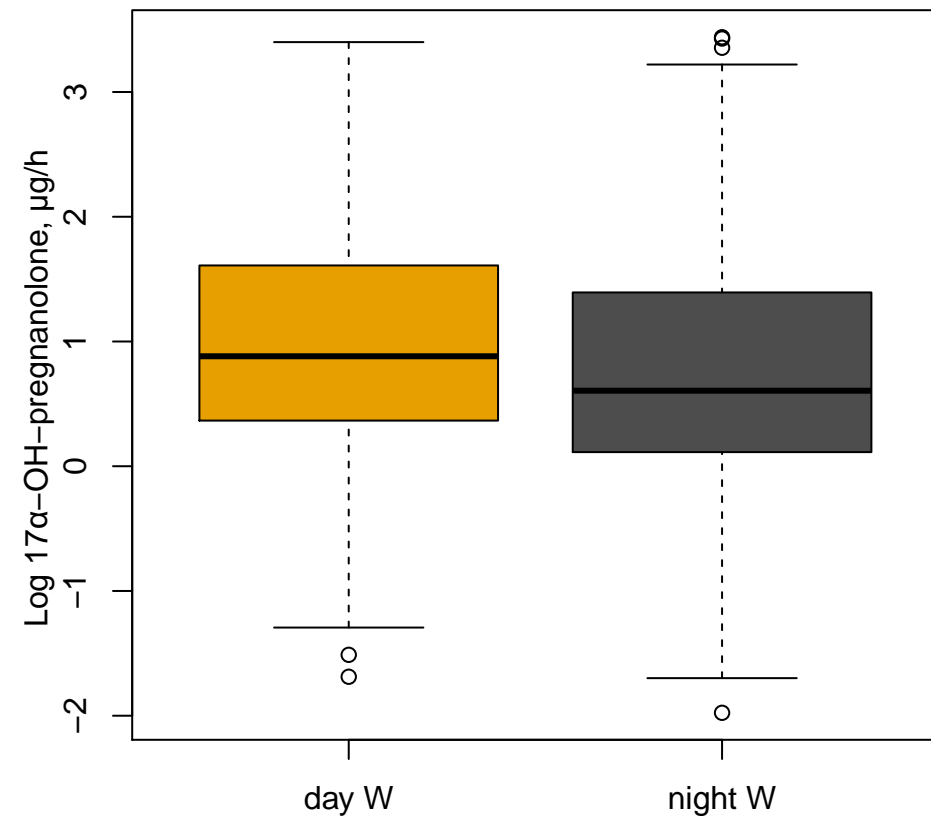

(g) M : rho= 0.741 n= 449

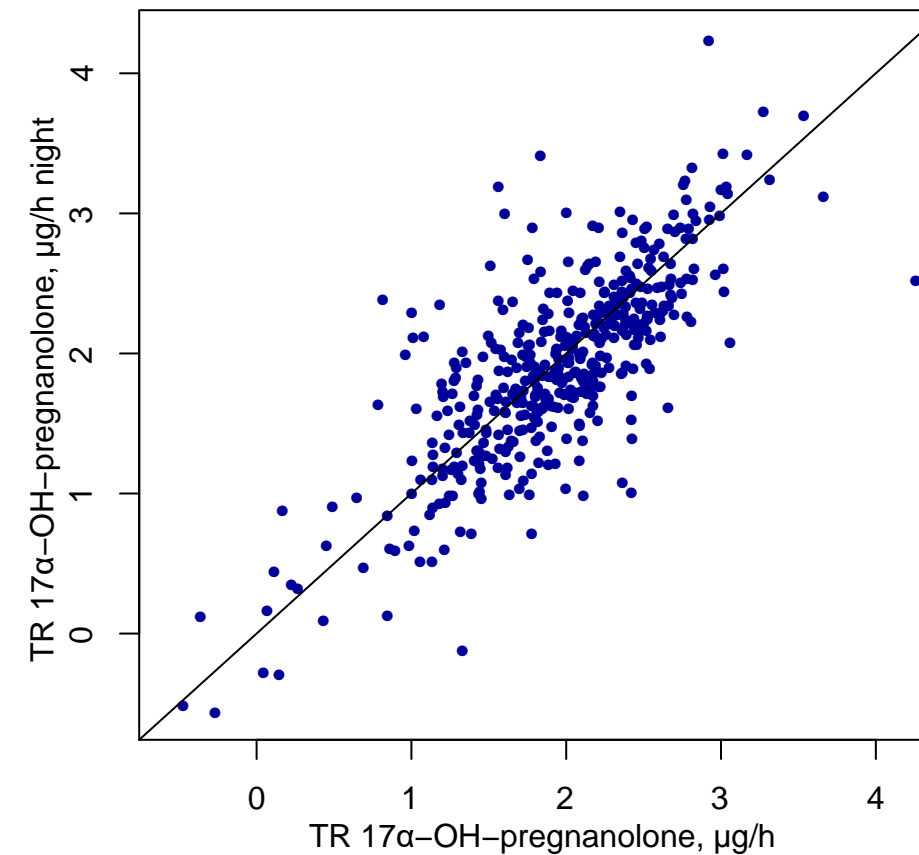

(h) W : rho= 0.887 n= 375

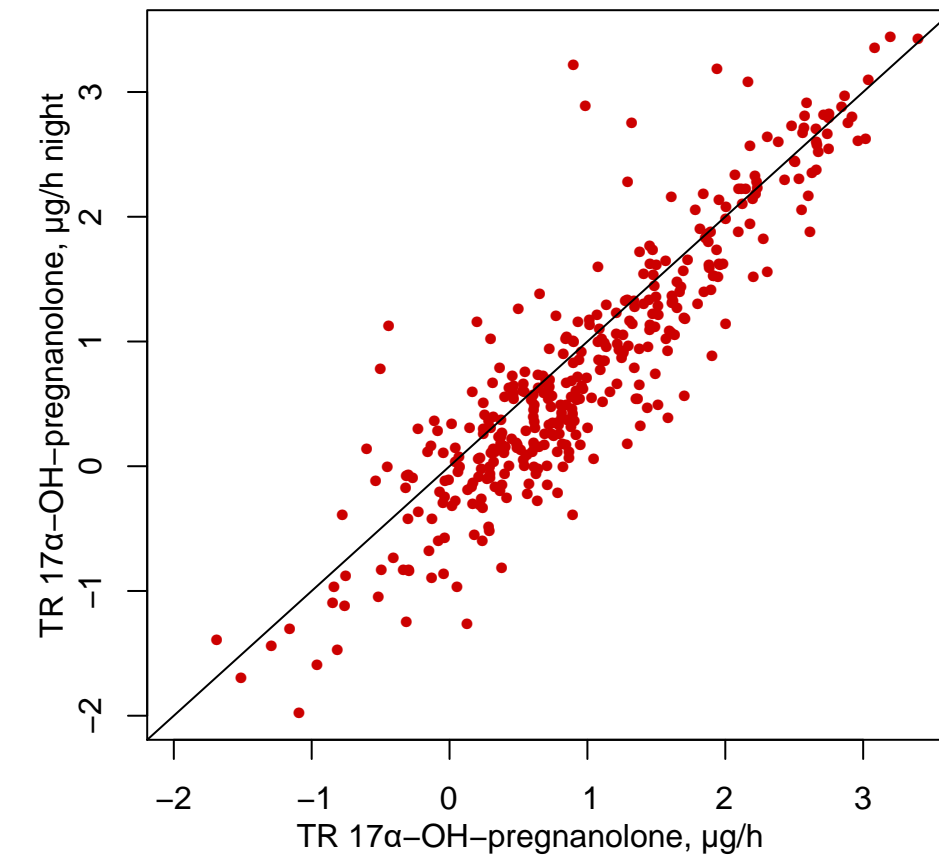

(a) M vs W: delta= 1.27 p = 0

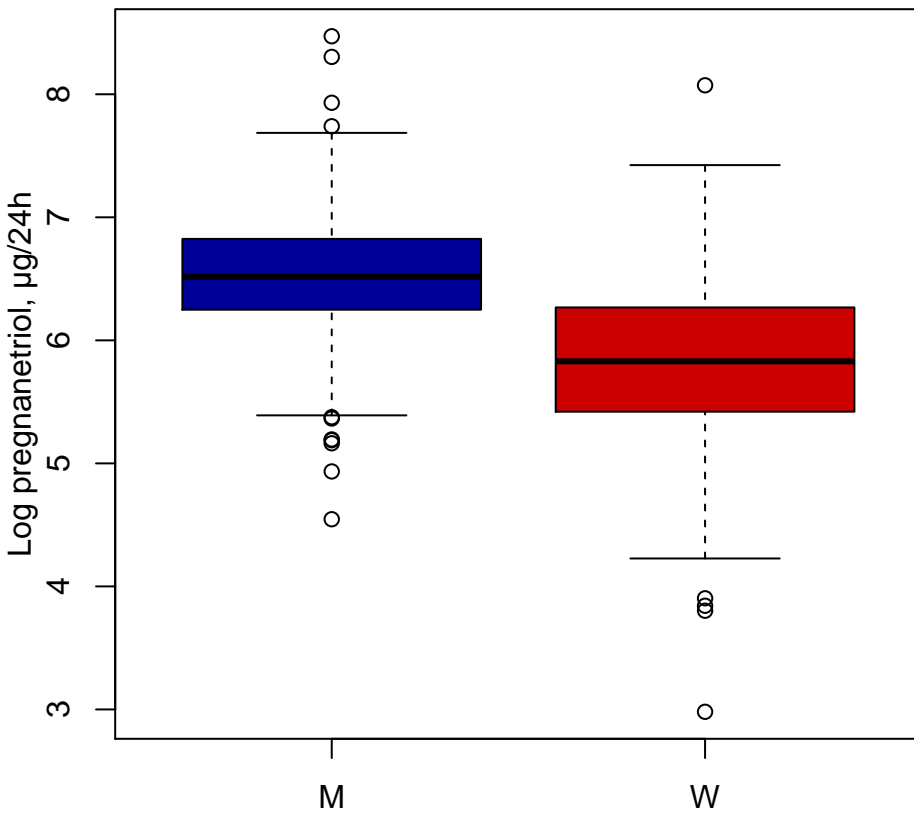

(b) M: p = 0 W: p = 0

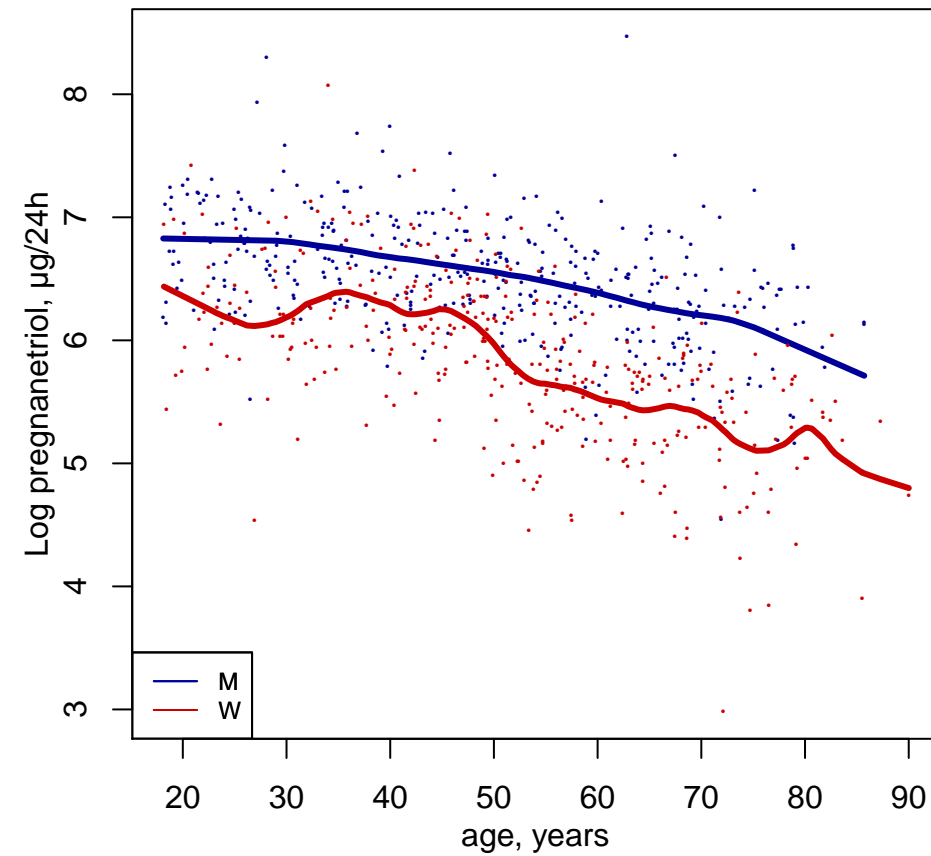

(c) TR= 0.1 nout= 3 sk= -0.05 ku= 0.28

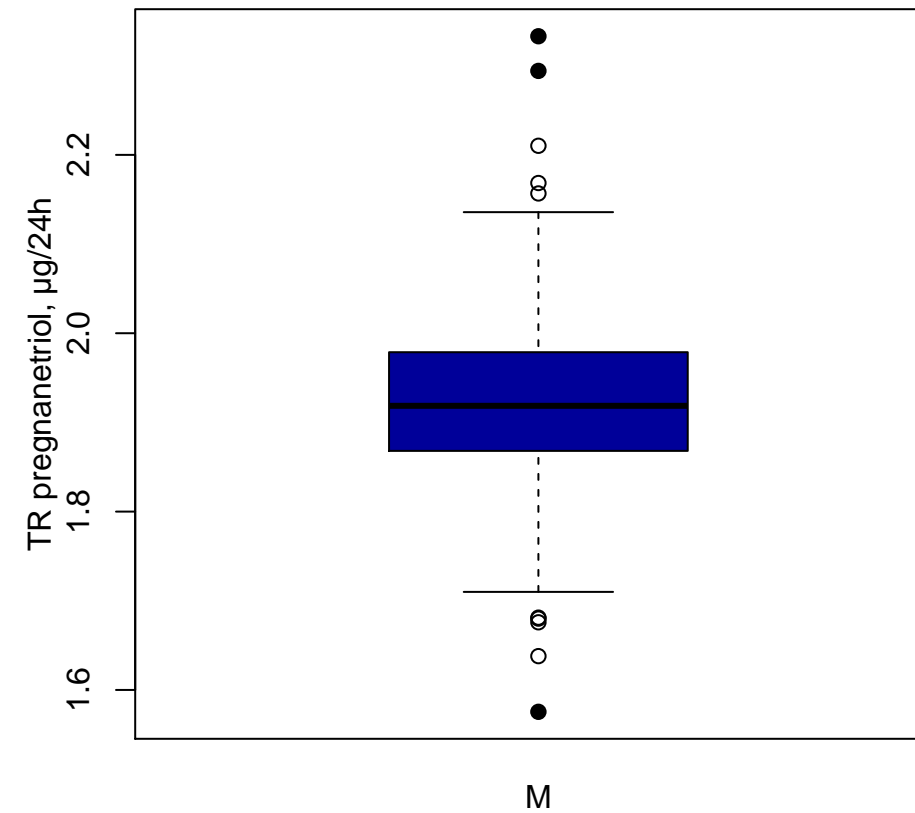

(d) TR= 0.2 nout= 1 sk= 0 ku= 0.28

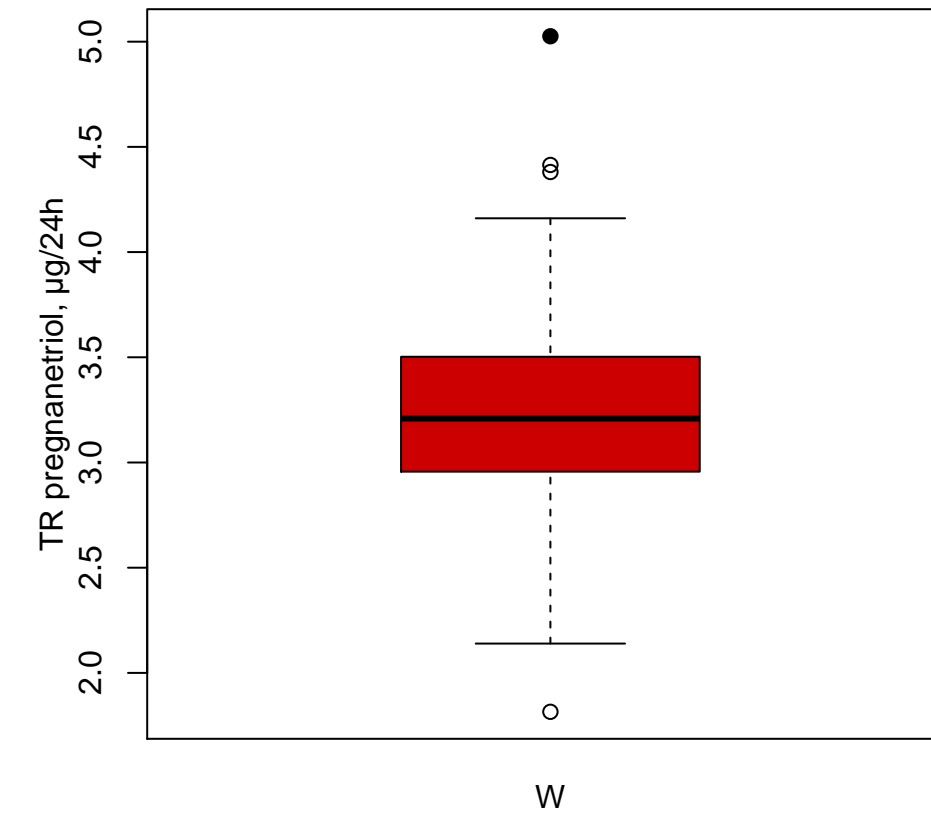

(e) D vs N: delta= -0.05 p = 0.512

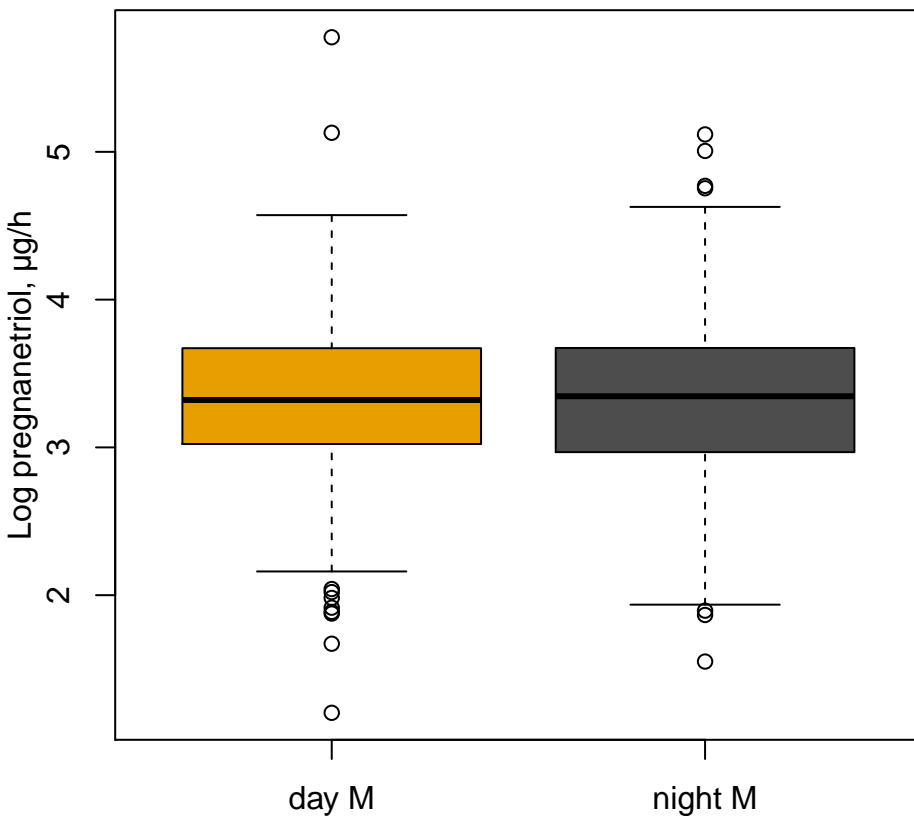

(f) D vs N: delta= 0.07 p = 0.015

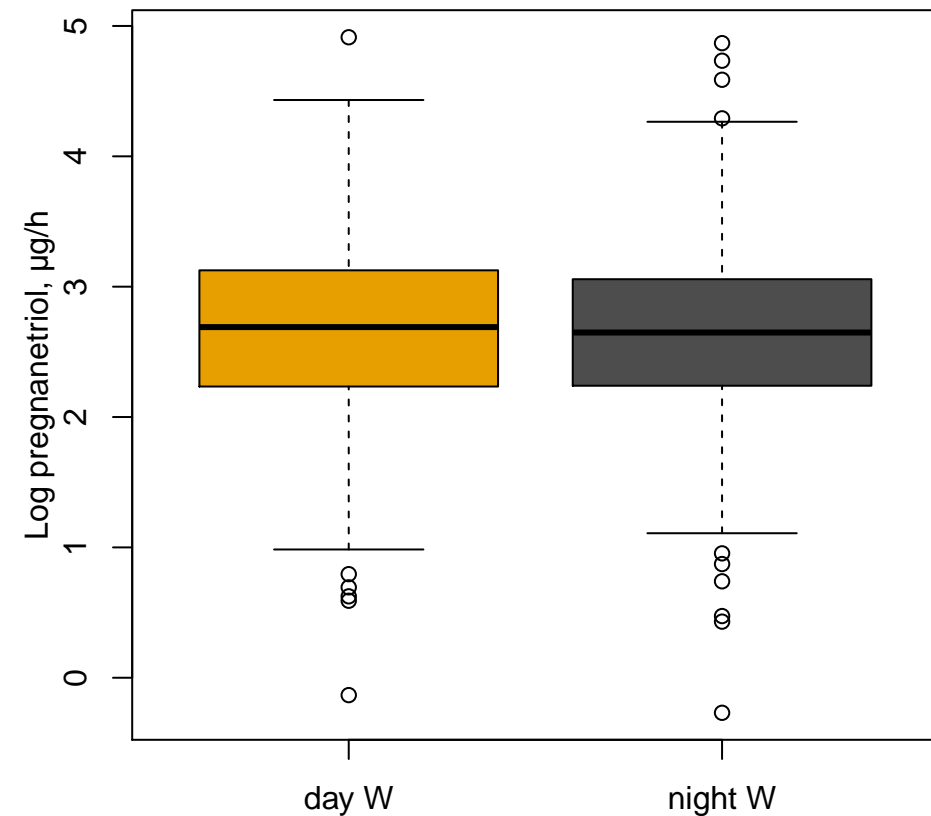

(g) M : rho= 0.677 n= 394

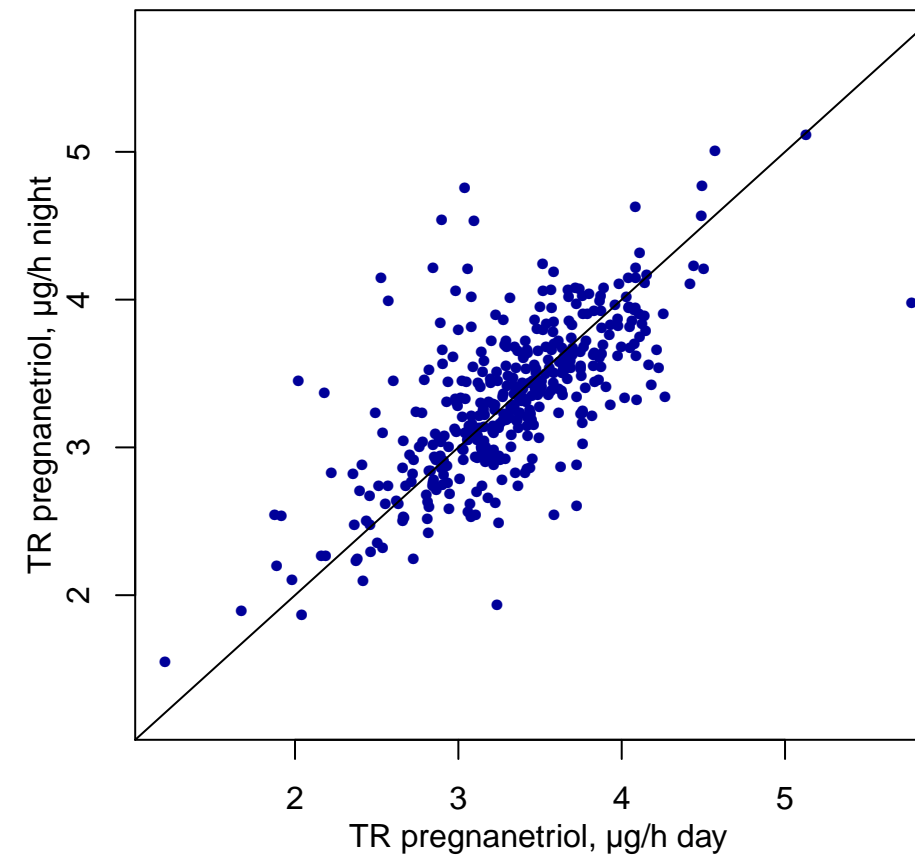

(h) W : rho= 0.85 n= 360

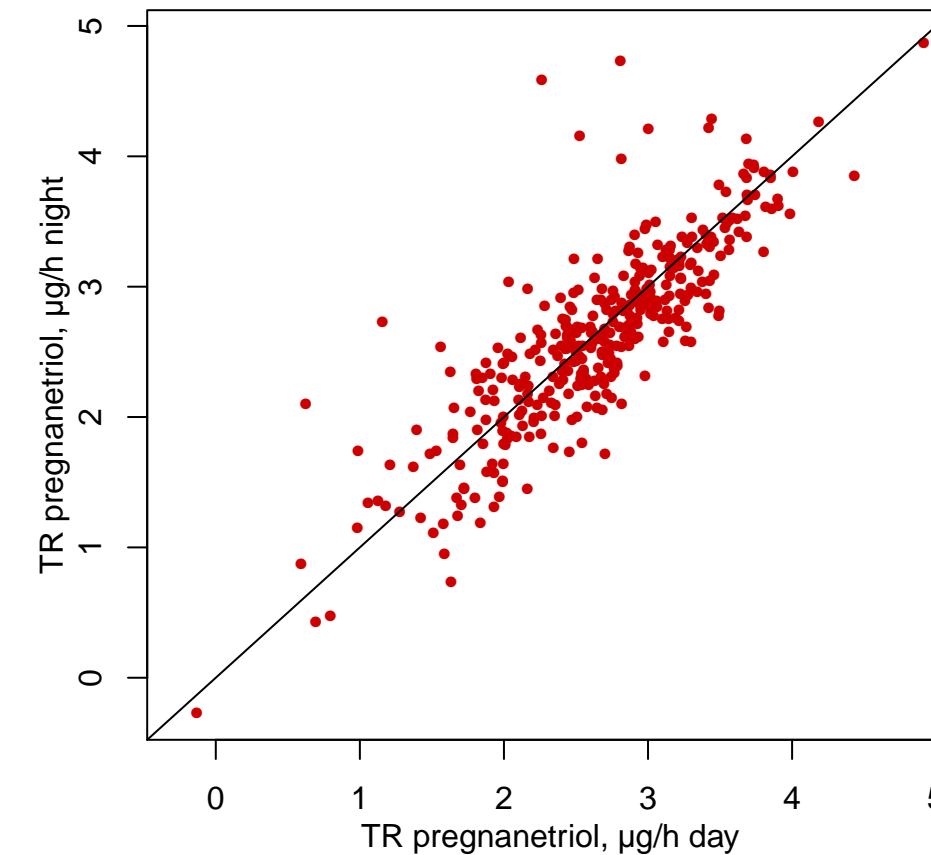

(a) M vs W:  $\delta = 0.96$   $p = 0$

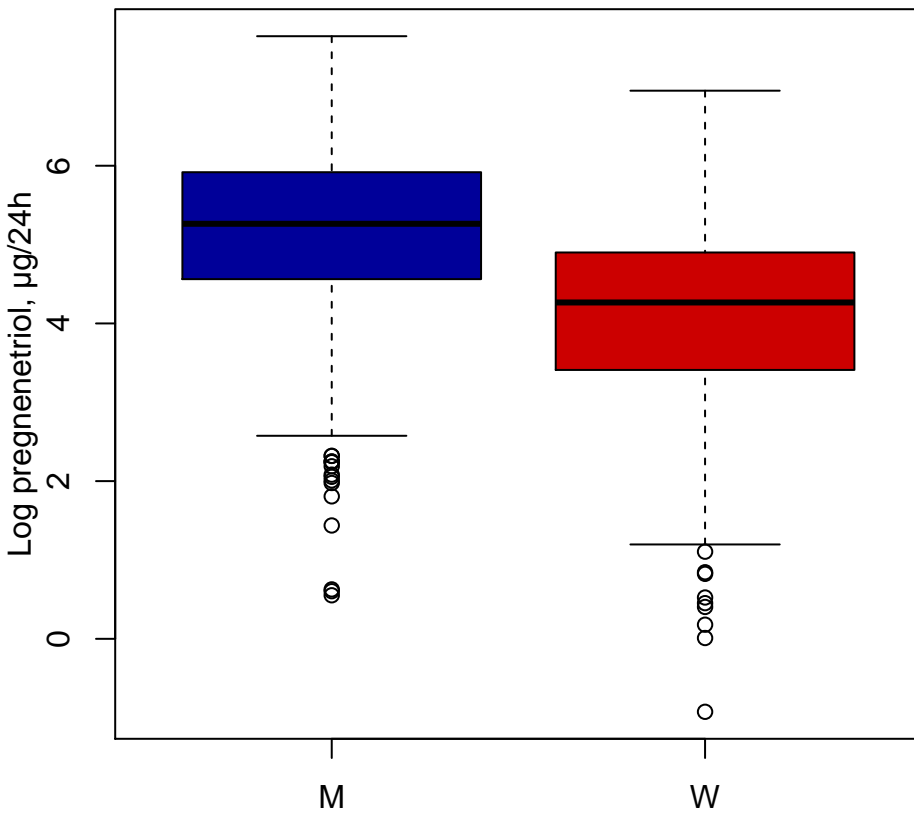

(b) M:  $p = 0$  W:  $p = 0$

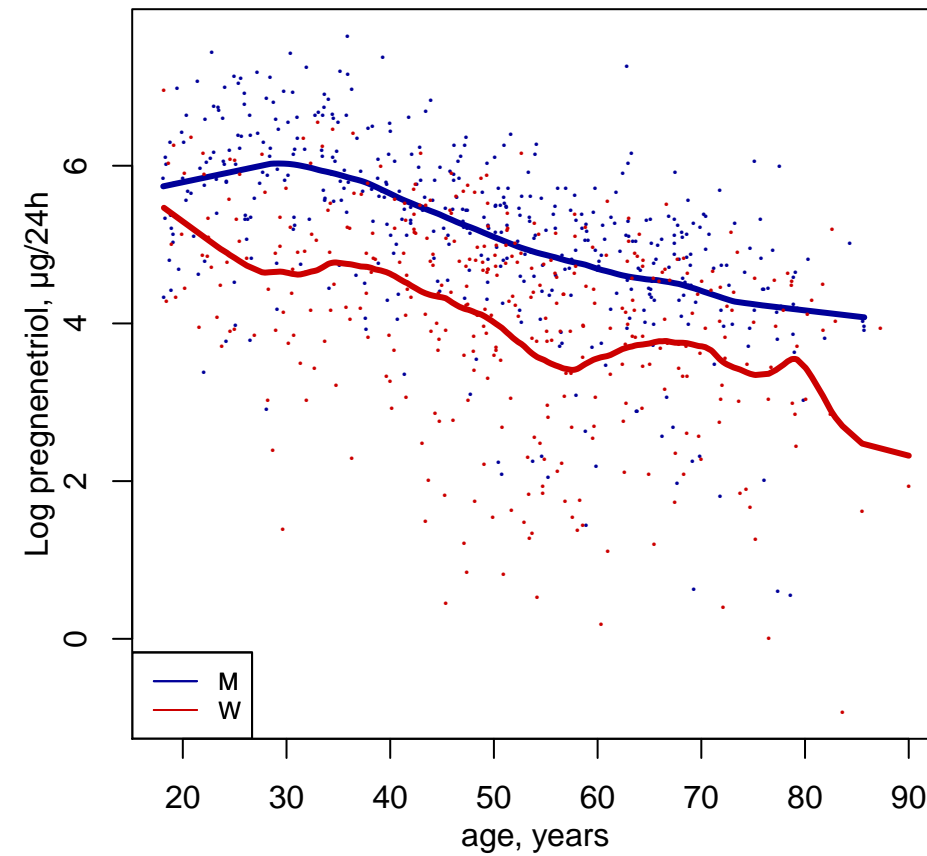

(c) TR= 0.2 nout= 0 sk= 0 ku= 0.21

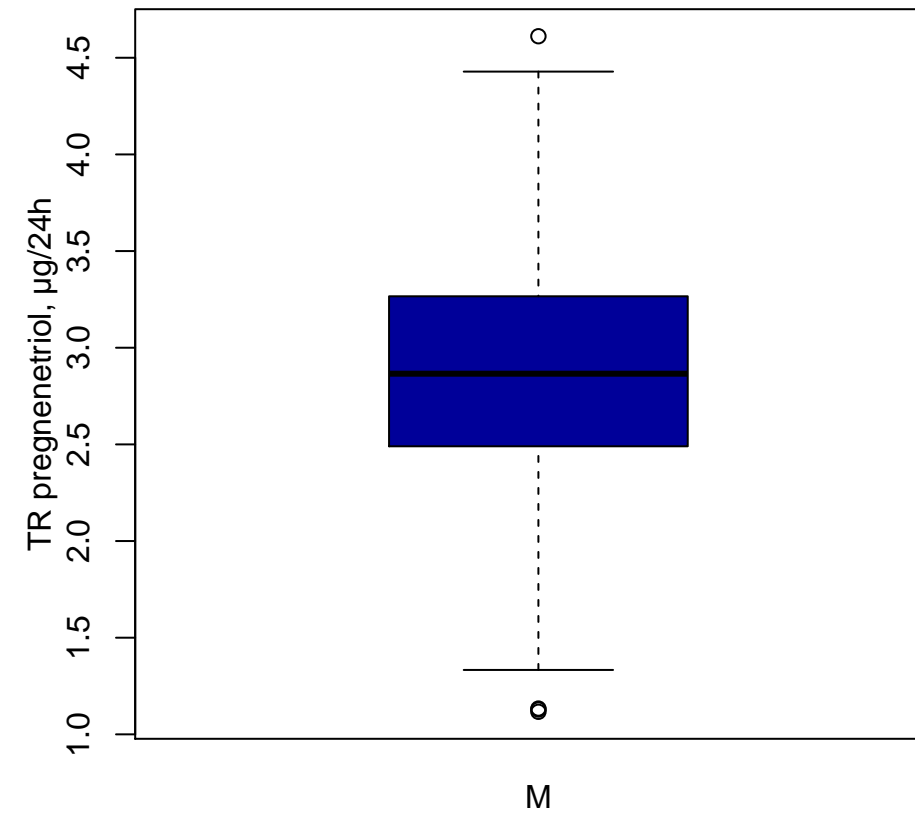

(d) TR= 0.2 nout= 0 sk= -0.06 ku= 0.21

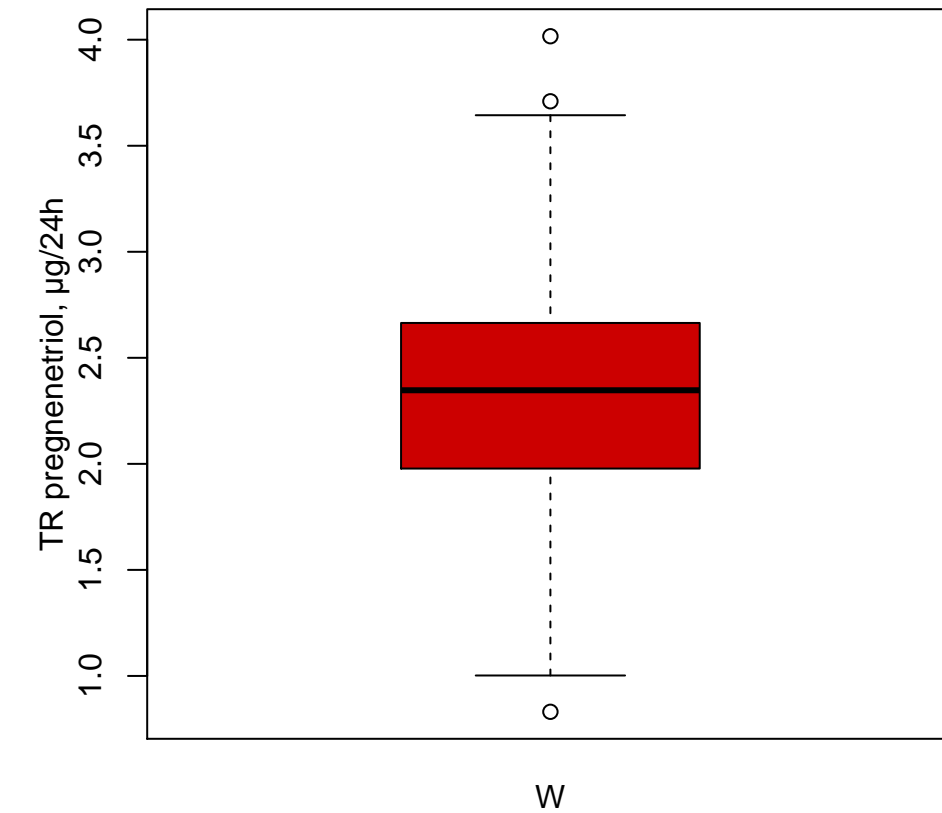

(e) D vs N:  $\delta = 0.14$   $p = 0$

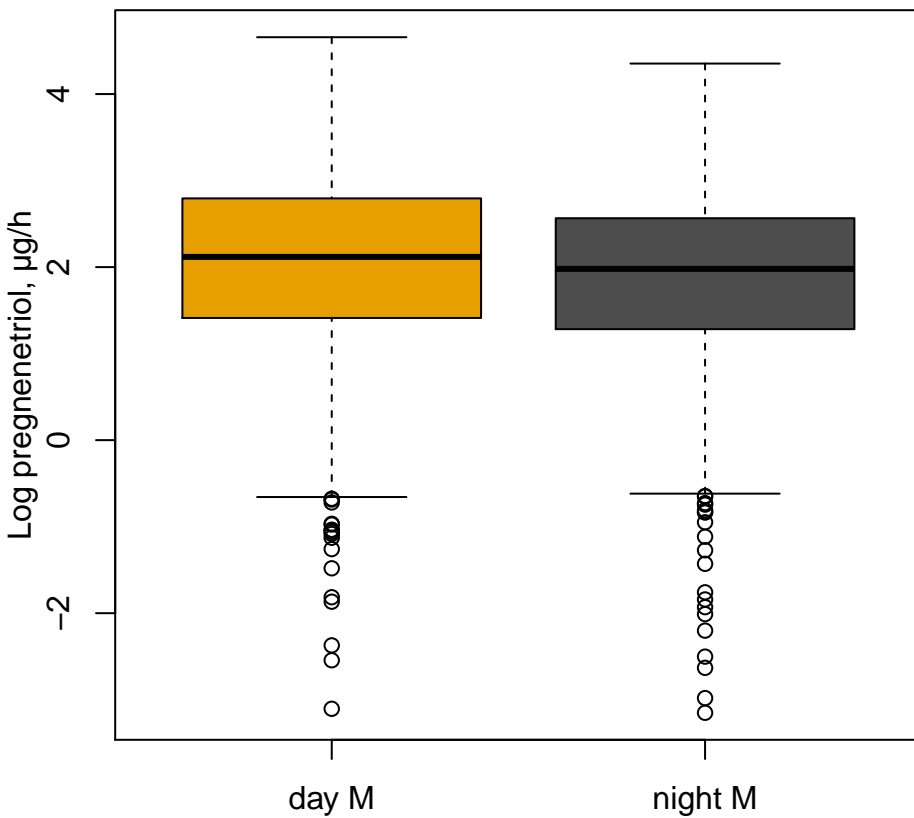

(f) D vs N:  $\delta = 0.22$   $p = 0$

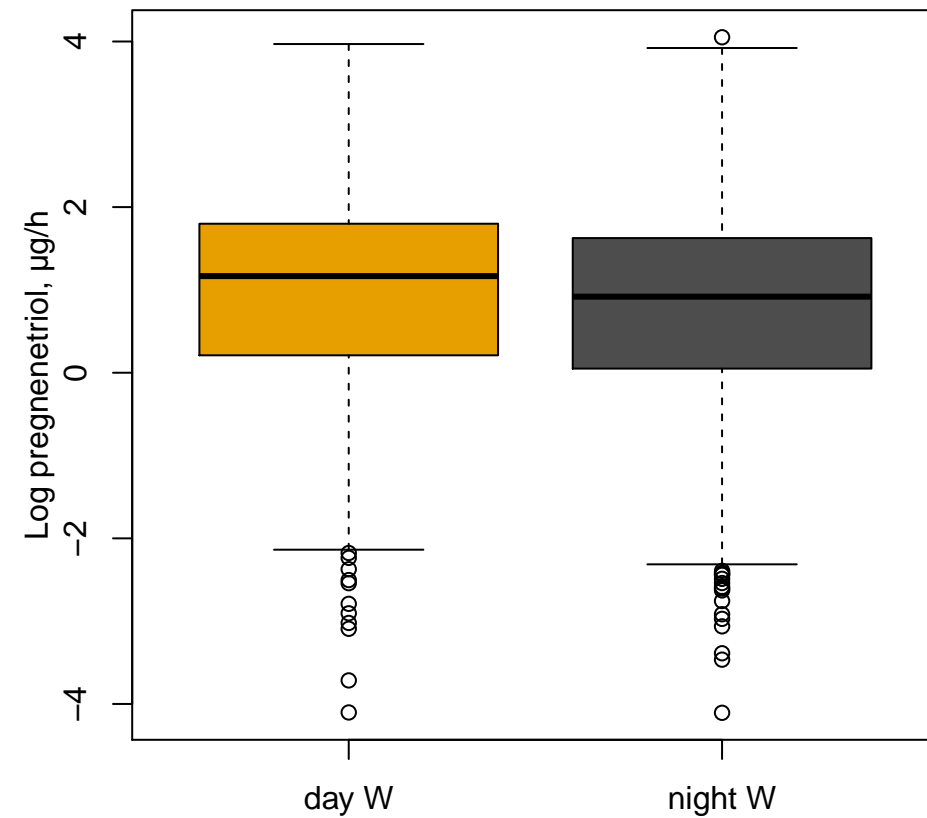

(g) M :  $\rho = 0.866$   $n = 446$

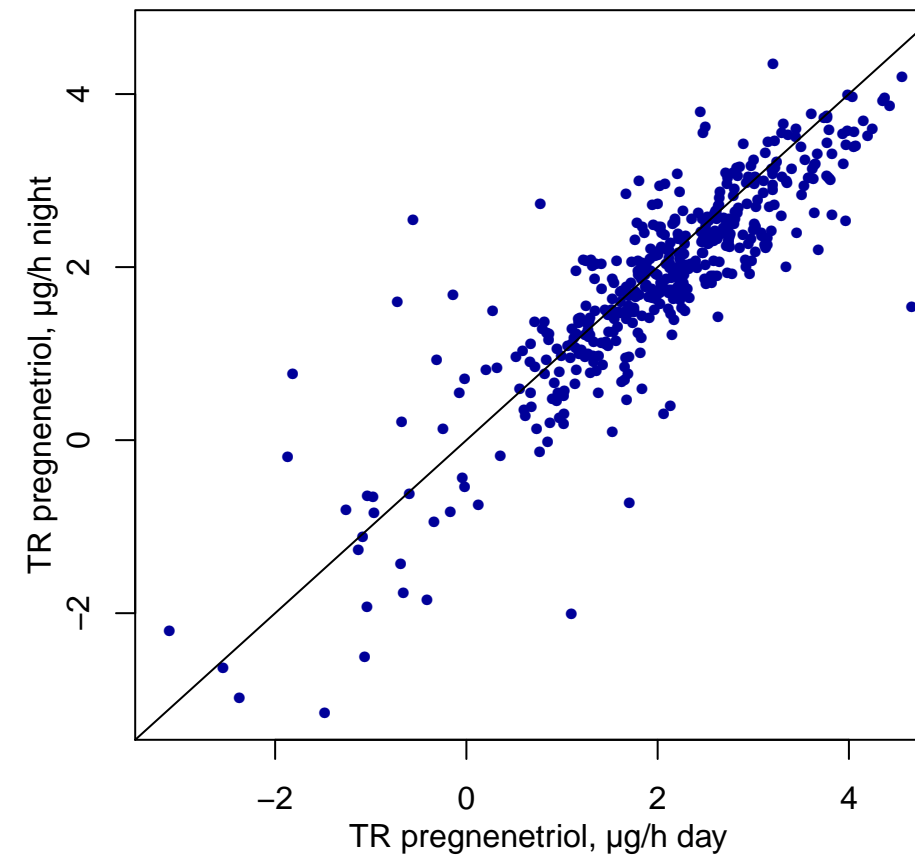

(h) W :  $\rho = 0.879$   $n = 378$

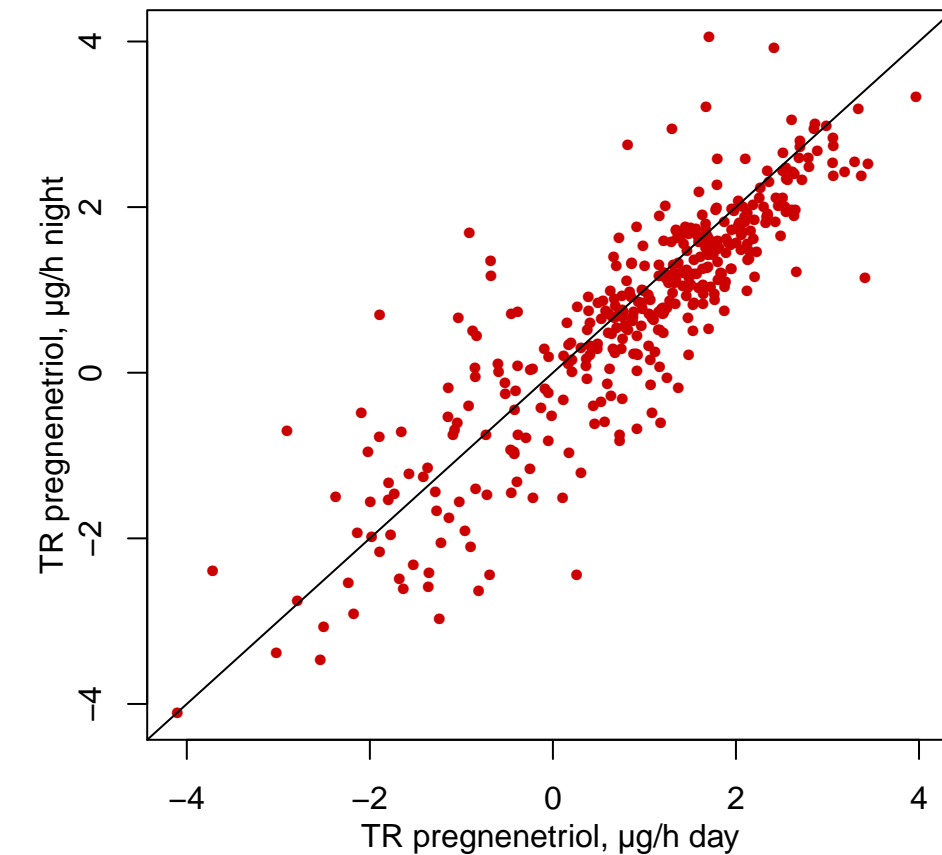

(a) M vs W: delta= 0.44 p = 0

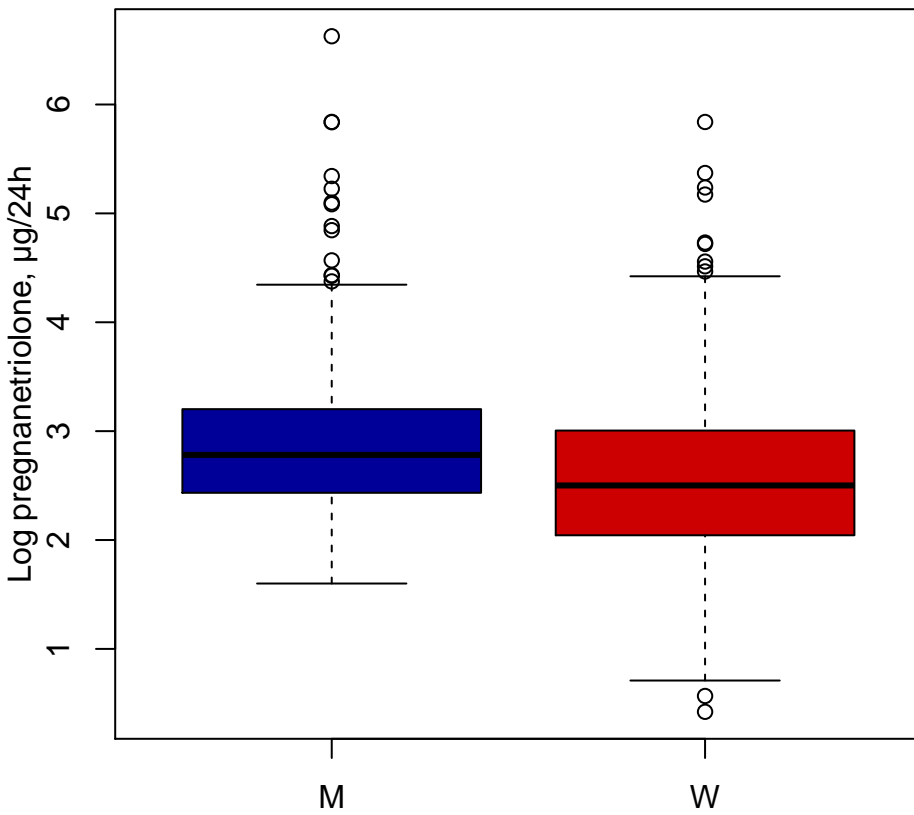

(b) M: p = 0.004 W: p = 0.005

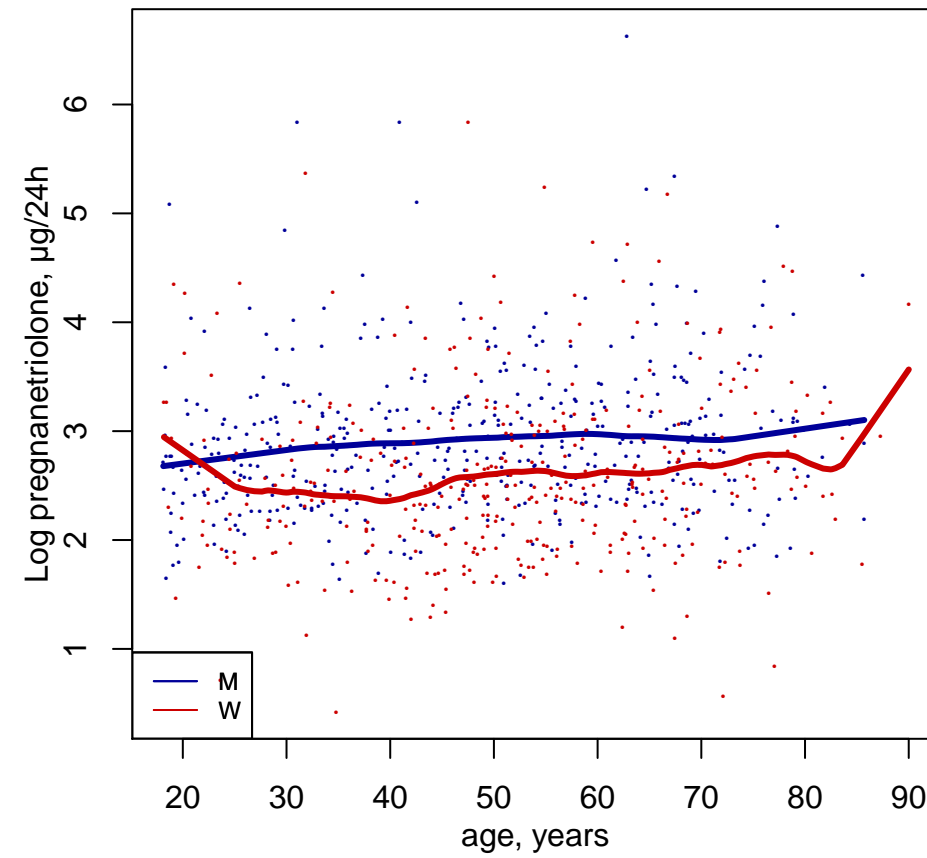

(c) TR= -0.5 nout= 0 sk= -0.05 ku= -0.01

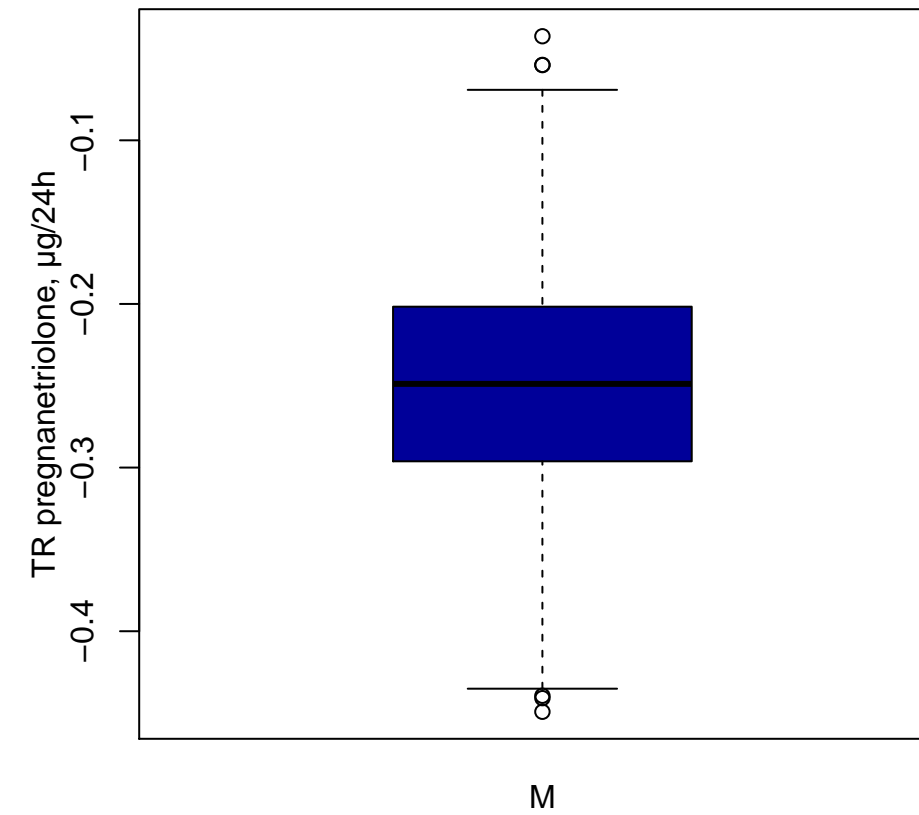

(d) TR= -0.2 nout= 0 sk= 0.15 ku= -0.01

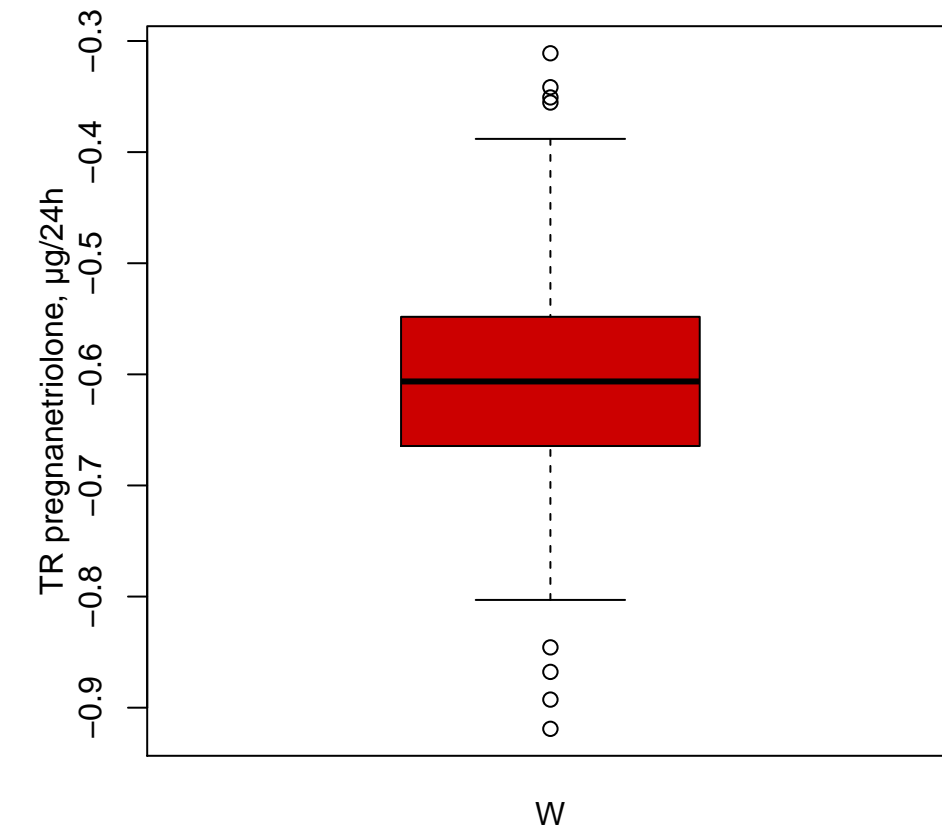

(e) D vs N: delta= 0.68 p = 0

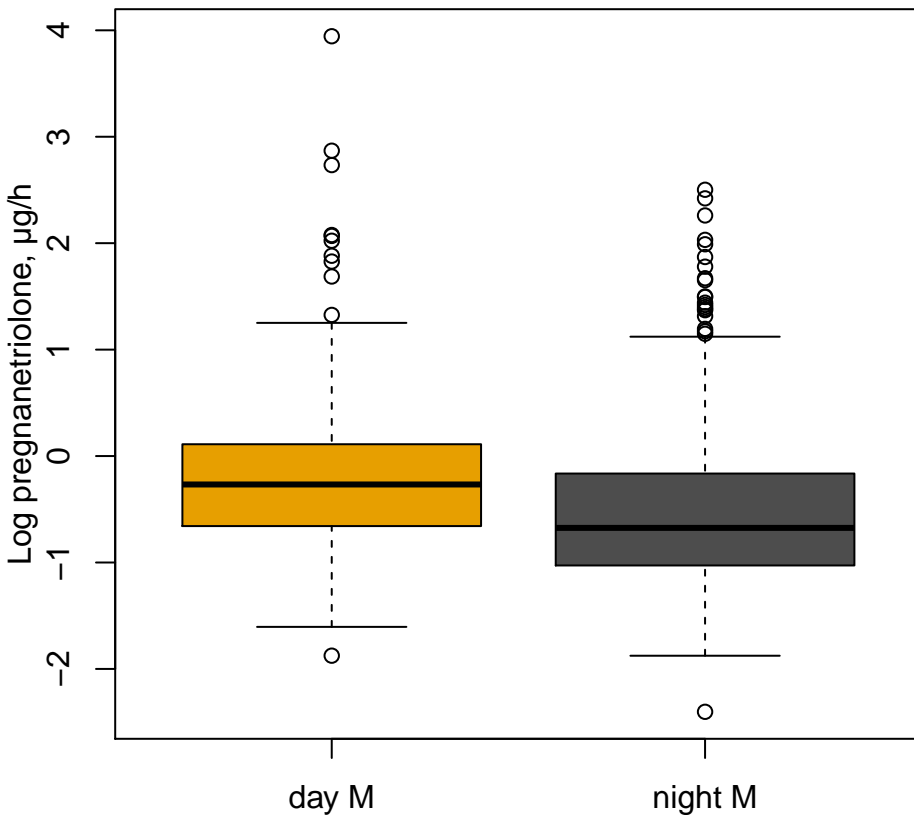

(f) D vs N: delta= 0.53 p = 0

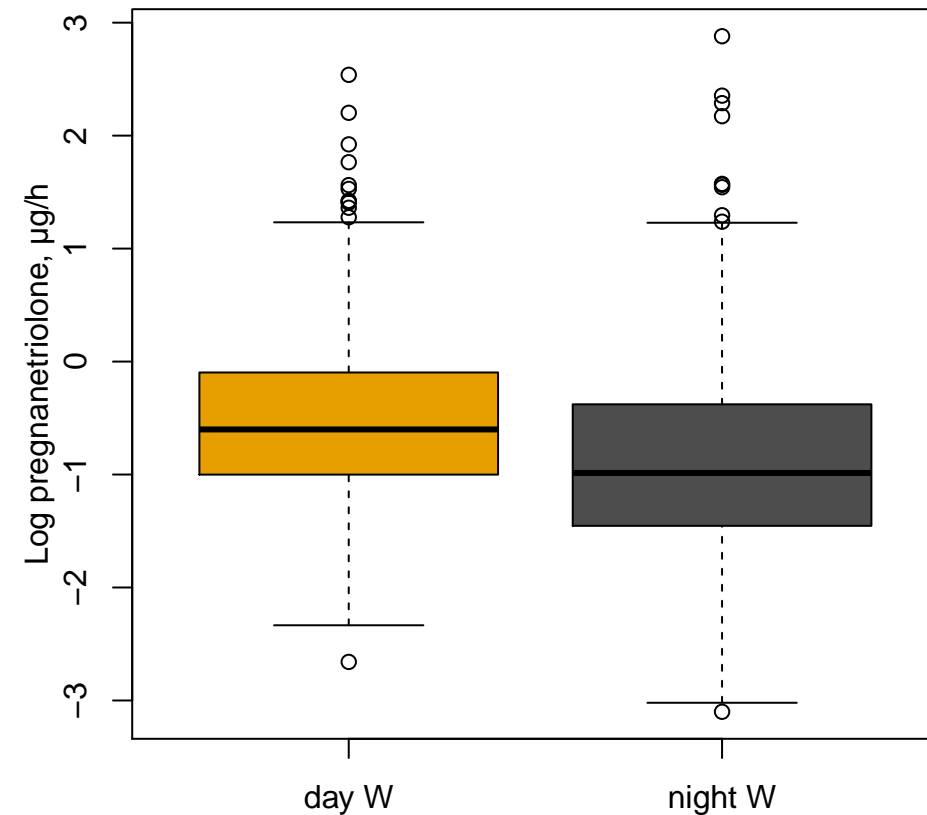

(g) M : rho= 0.742 n= 455

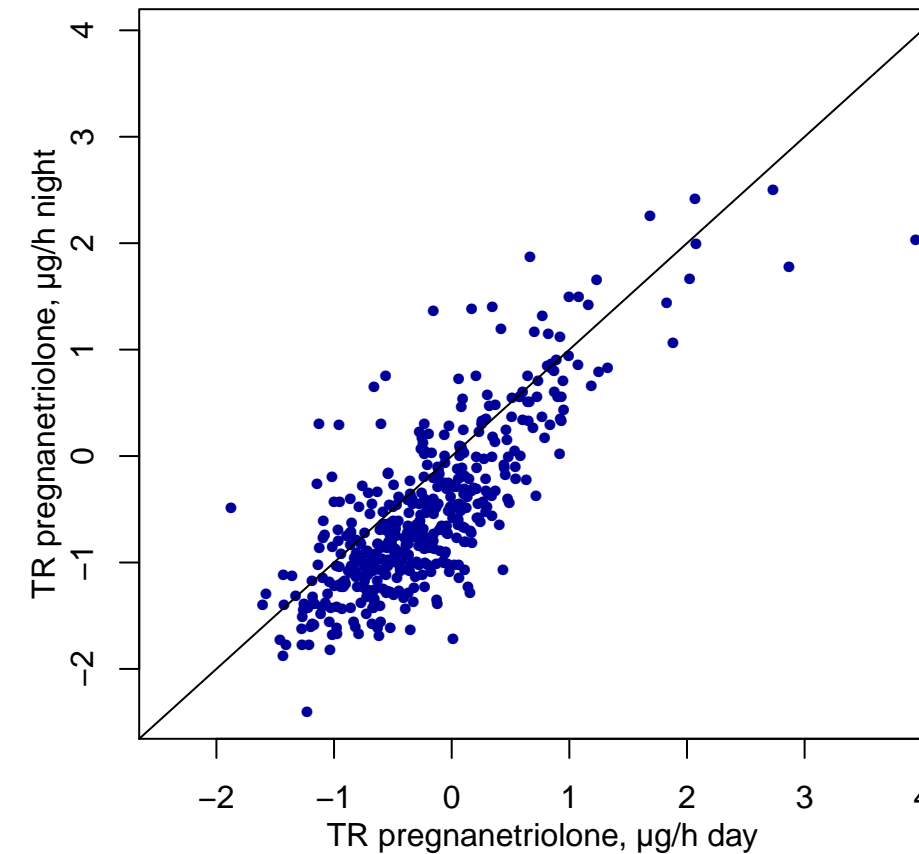

(h) W : rho= 0.824 n= 379

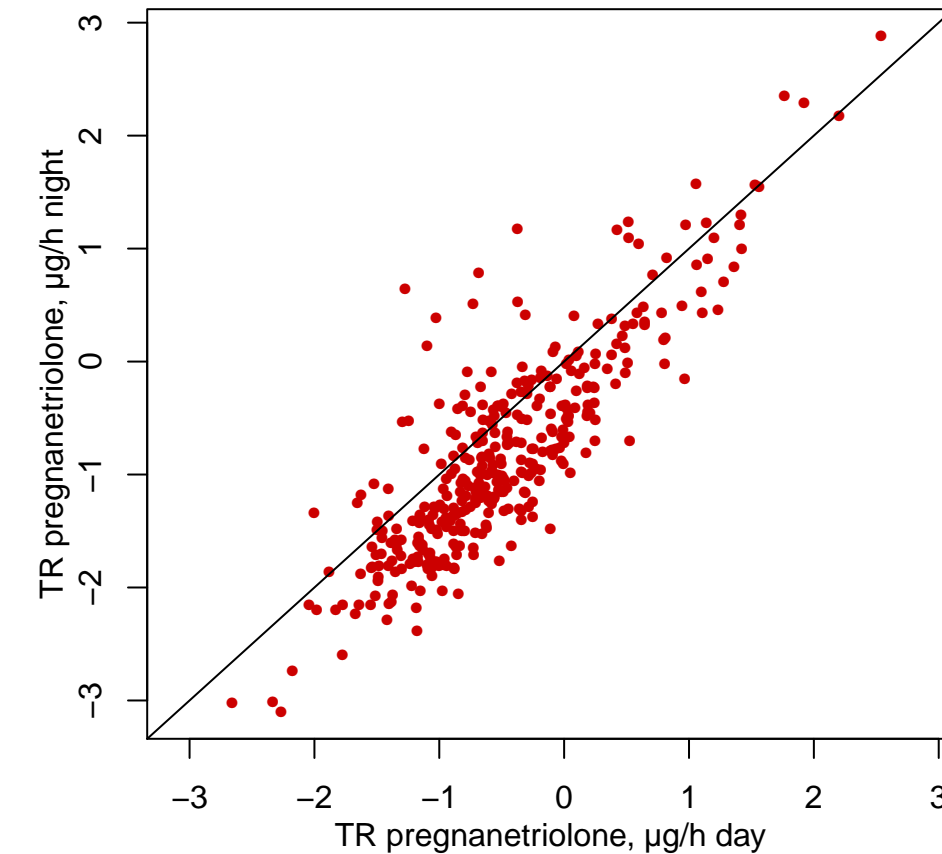

(a) M vs W: delta= 0.01 p = 0.566

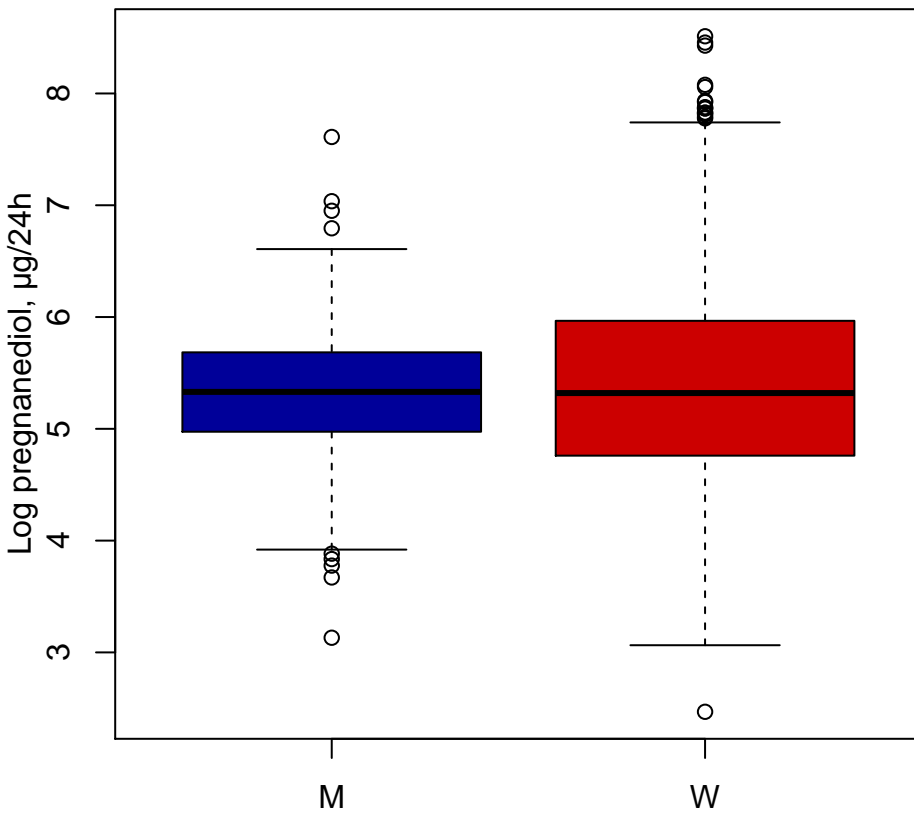

(b) M: p = 0 W: p = 0

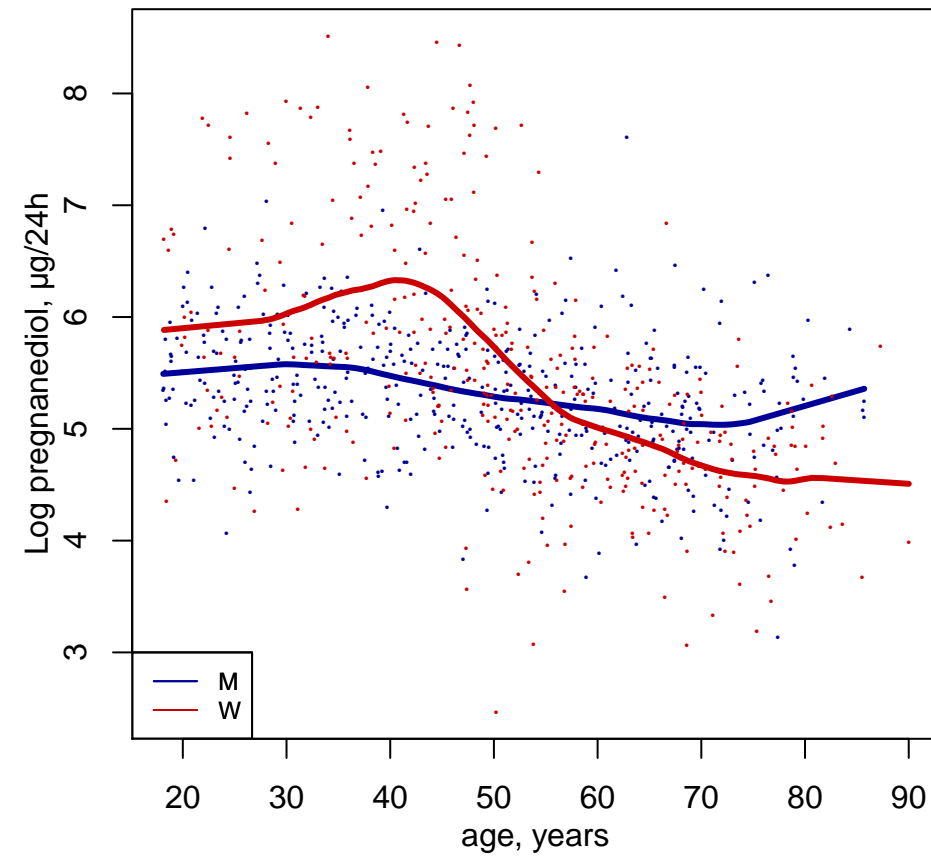

(c) TR= 0.1 nout= 1 sk= -0.01 ku= 0.3

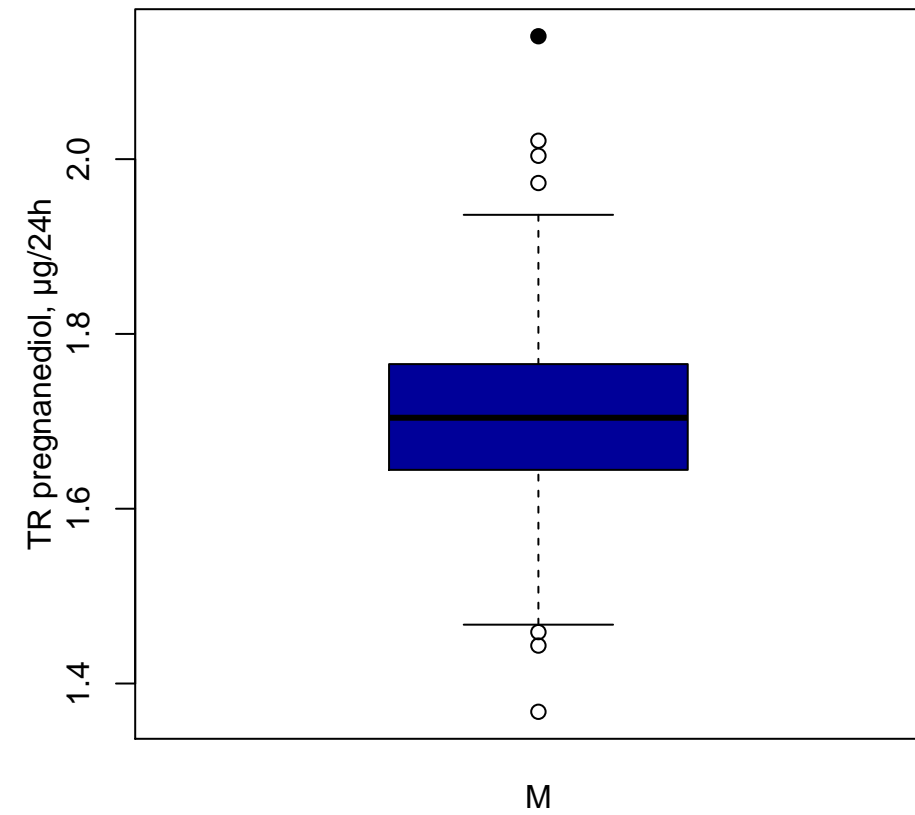

(d) TR= -0.2 nout= 1 sk= 0.06 ku= 0.3

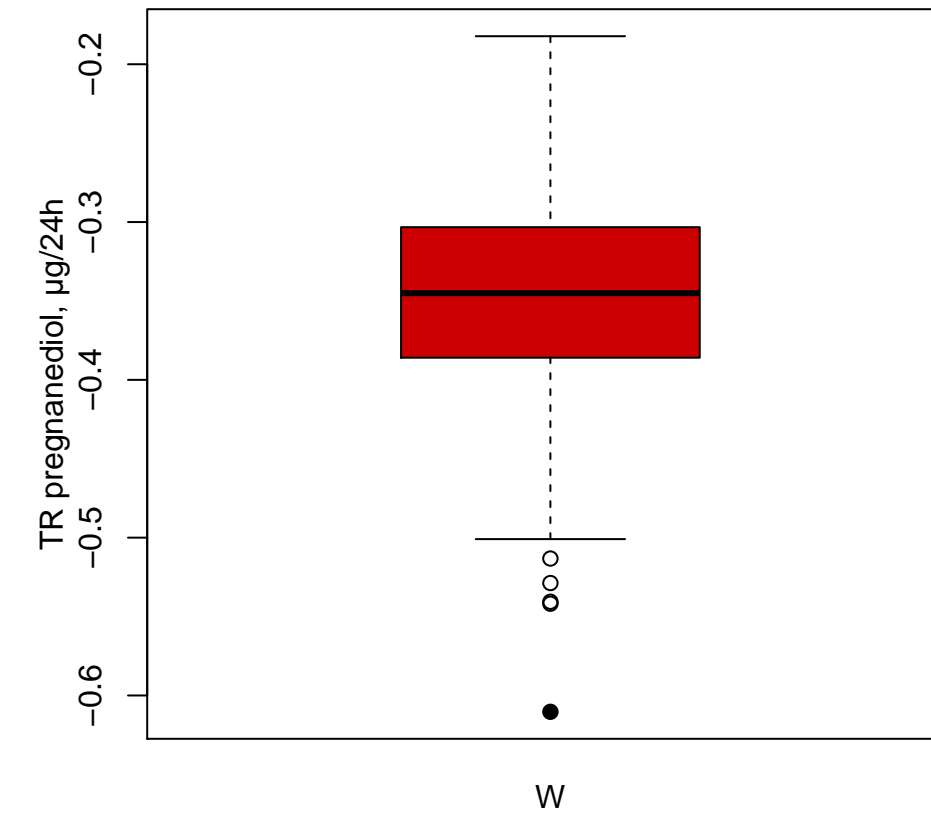

(e) D vs N: delta= 0.03 p = 0.127

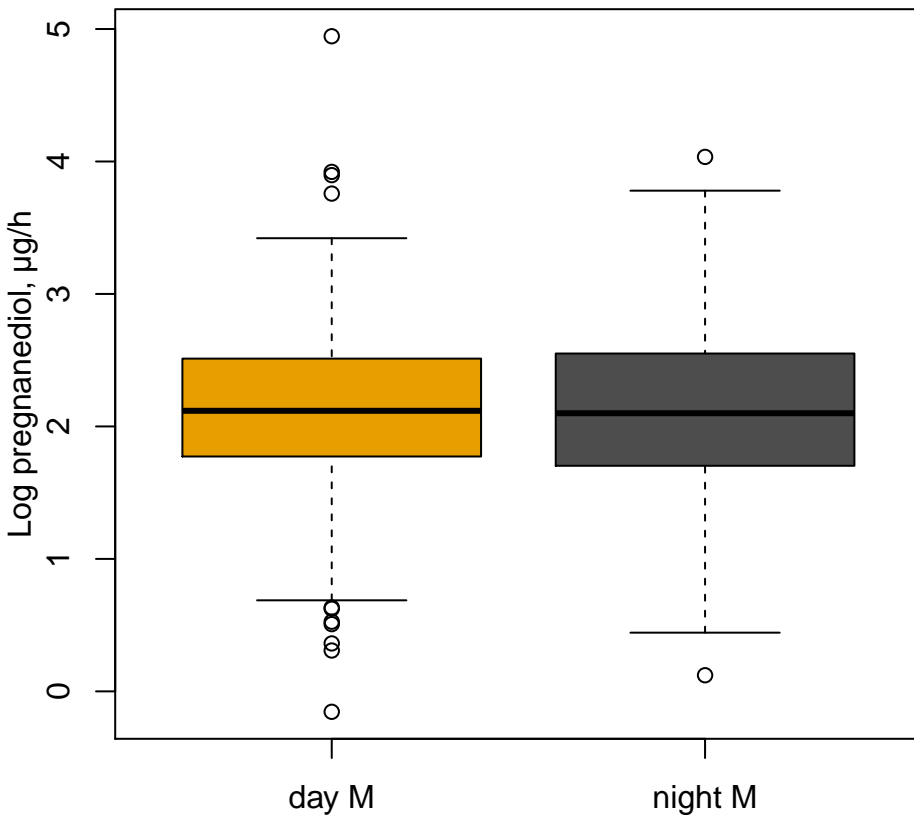

(f) D vs N: delta= 0.1 p = 0.002

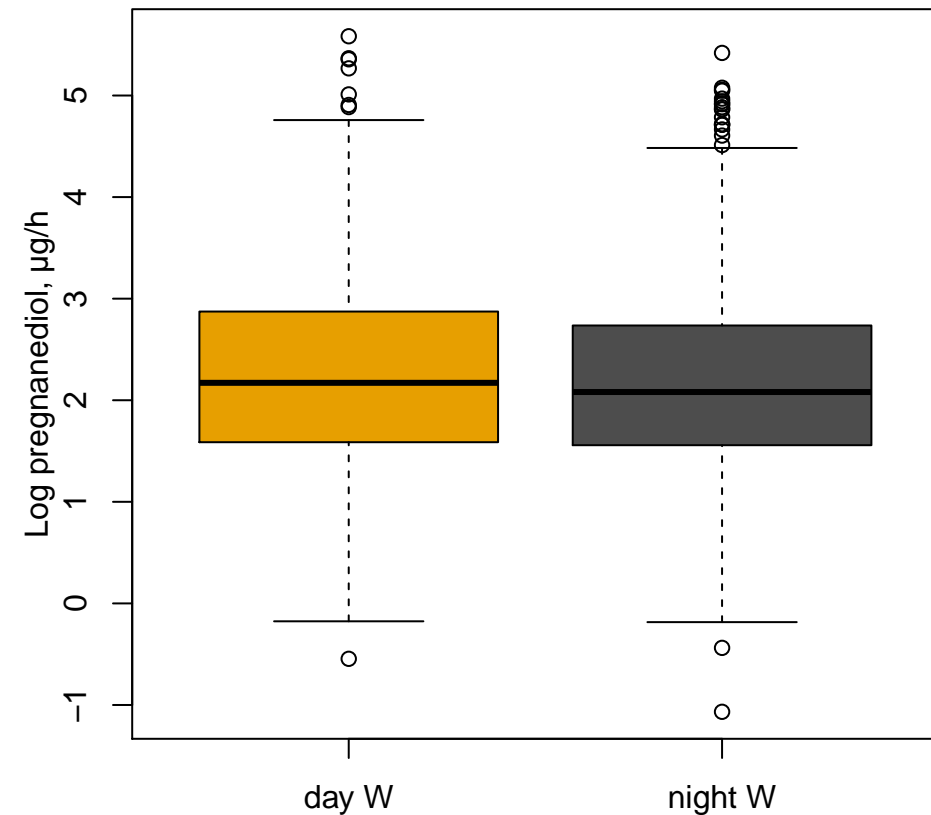

(g) M : rho= 0.723 n= 455

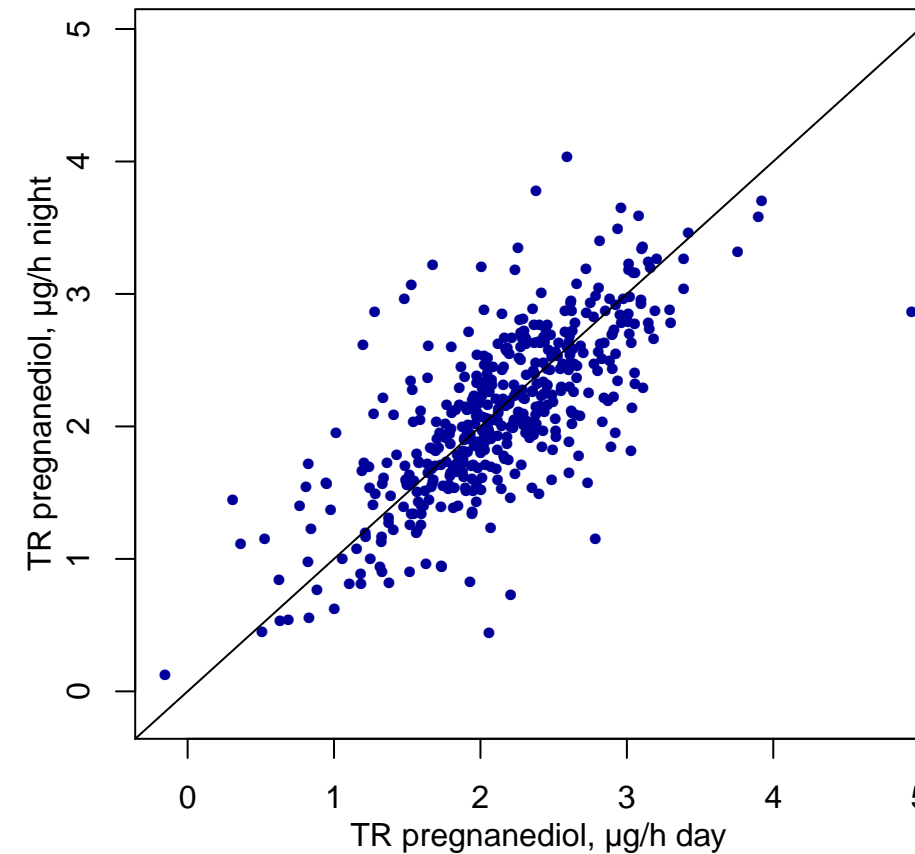

(h) W : rho= 0.889 n= 376

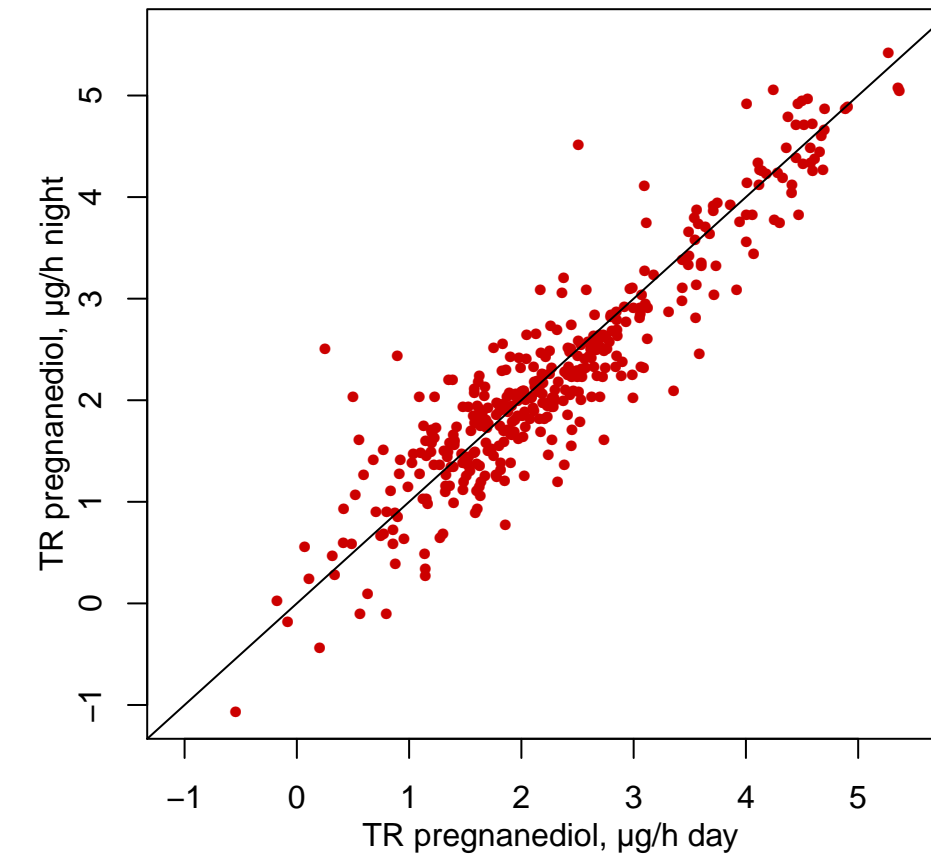

(a) M vs W:  $\delta = 0.67$   $p = 0$

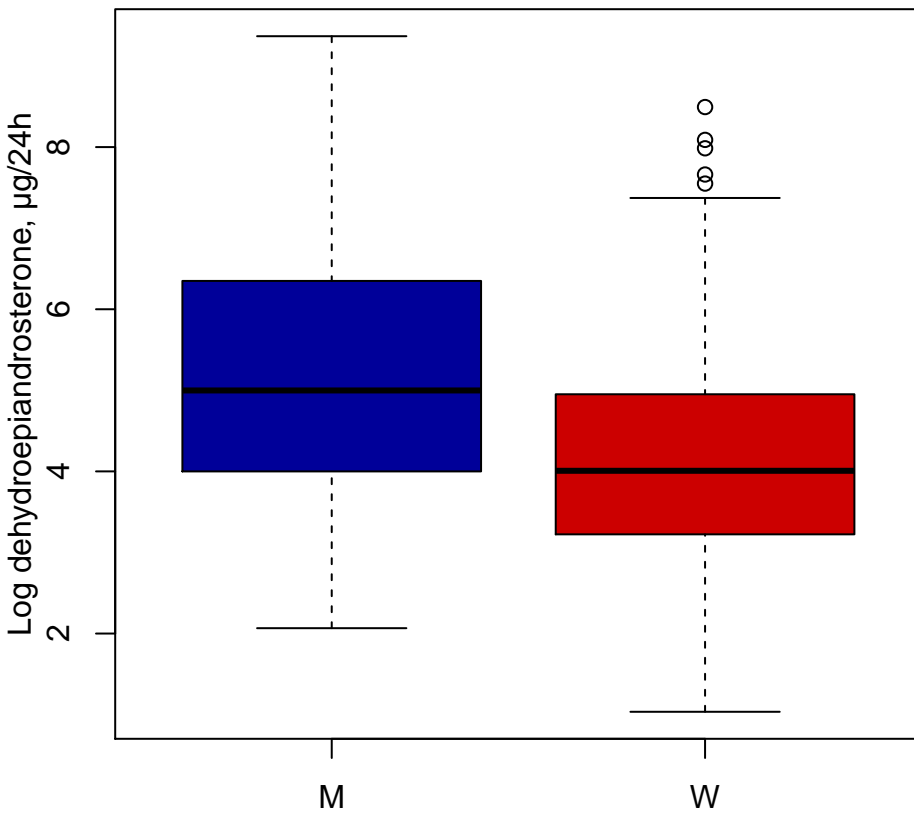

(b) M:  $p = 0$  W:  $p = 0$

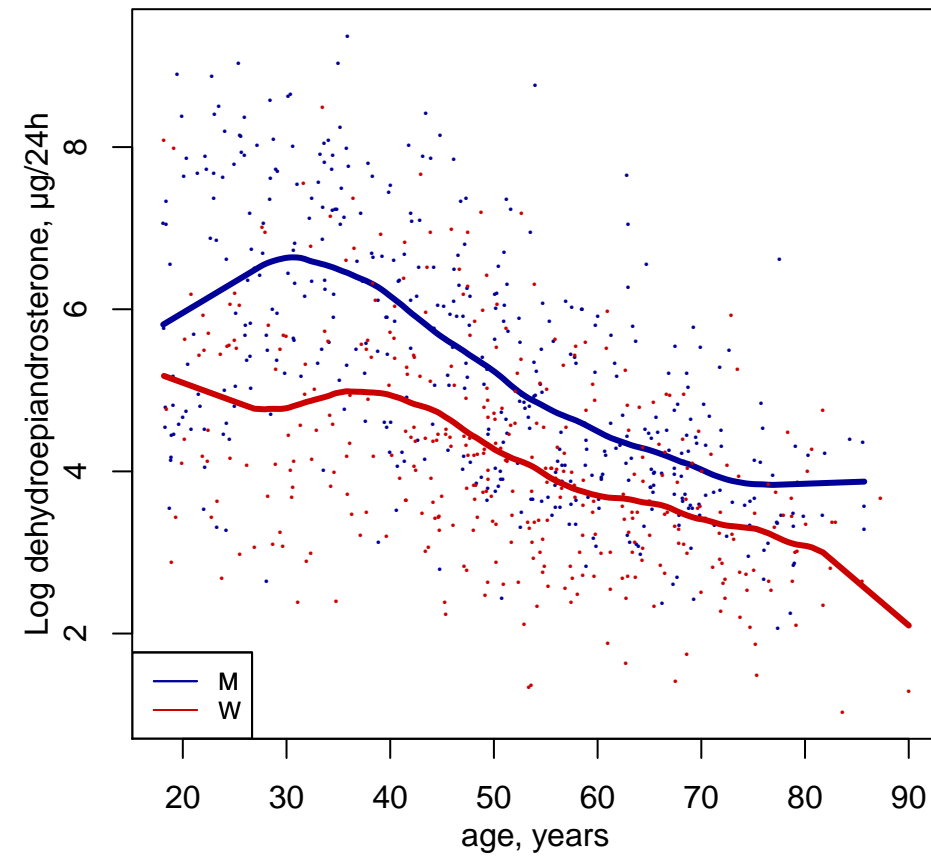

(c) TR = -0.2 nout = 0 sk = -0.08 ku = -0.82

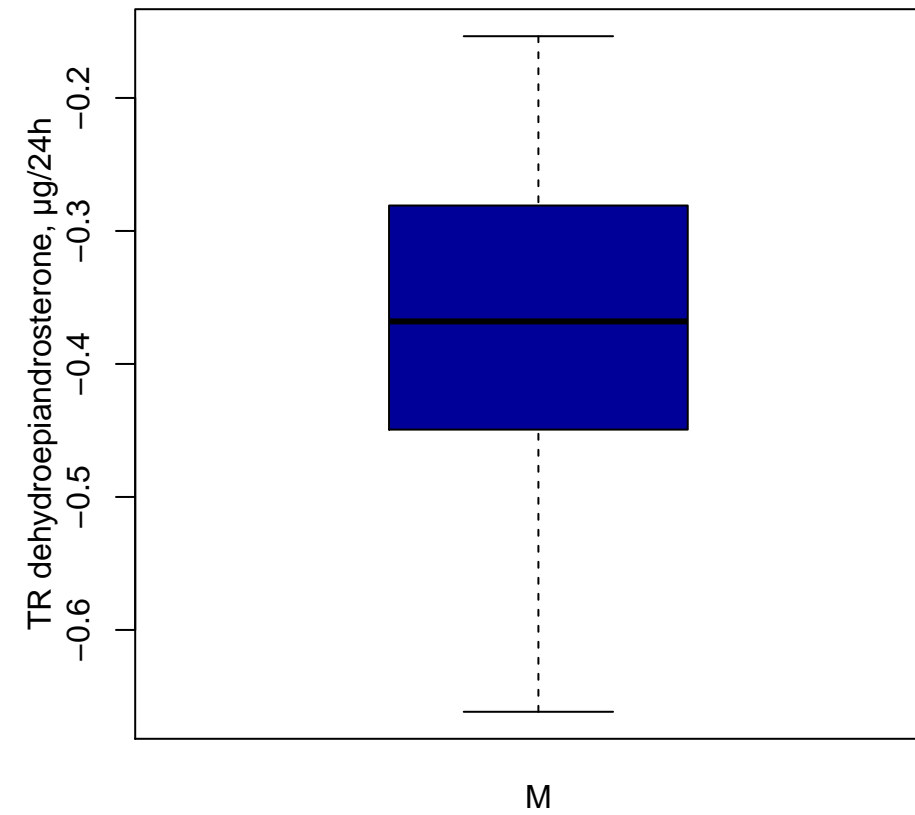

(d) TR = -0.1 nout = 0 sk = 0.17 ku = -0.82

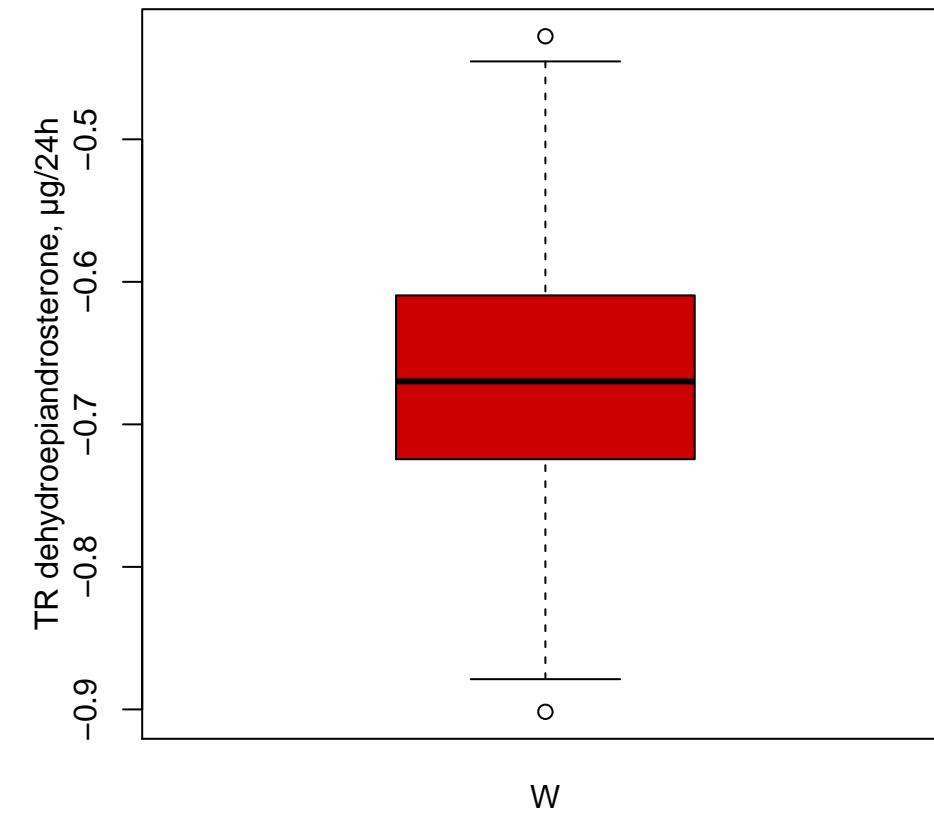

(e) D vs N:  $\delta = 0.22$   $p = 0$

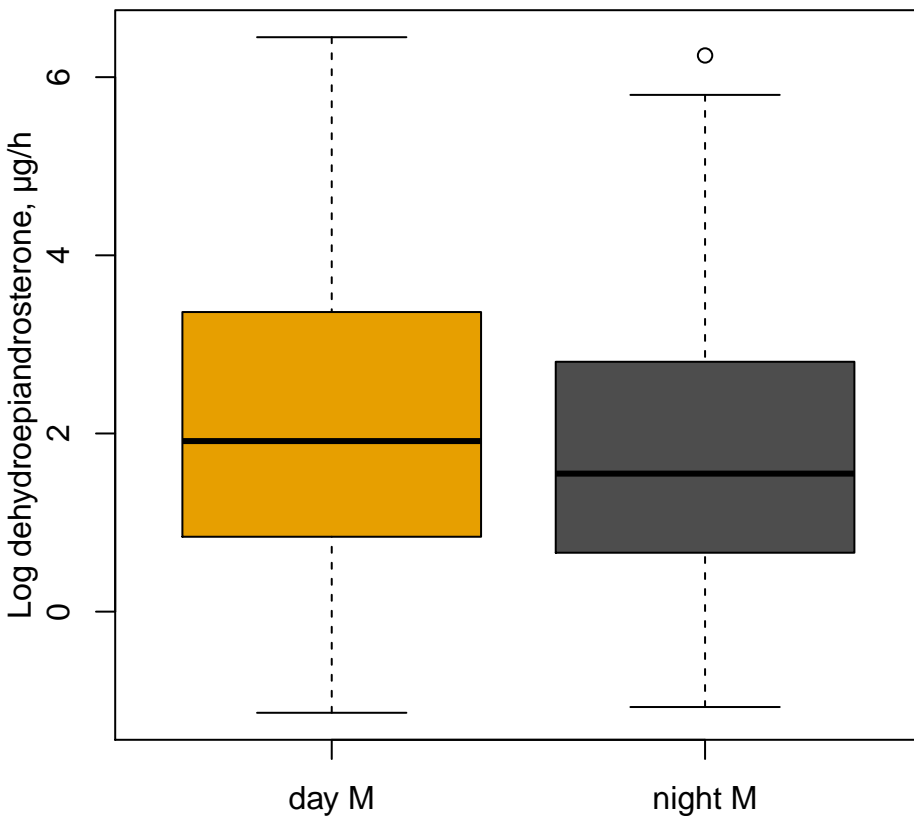

(f) D vs N:  $\delta = 0.19$   $p = 0$

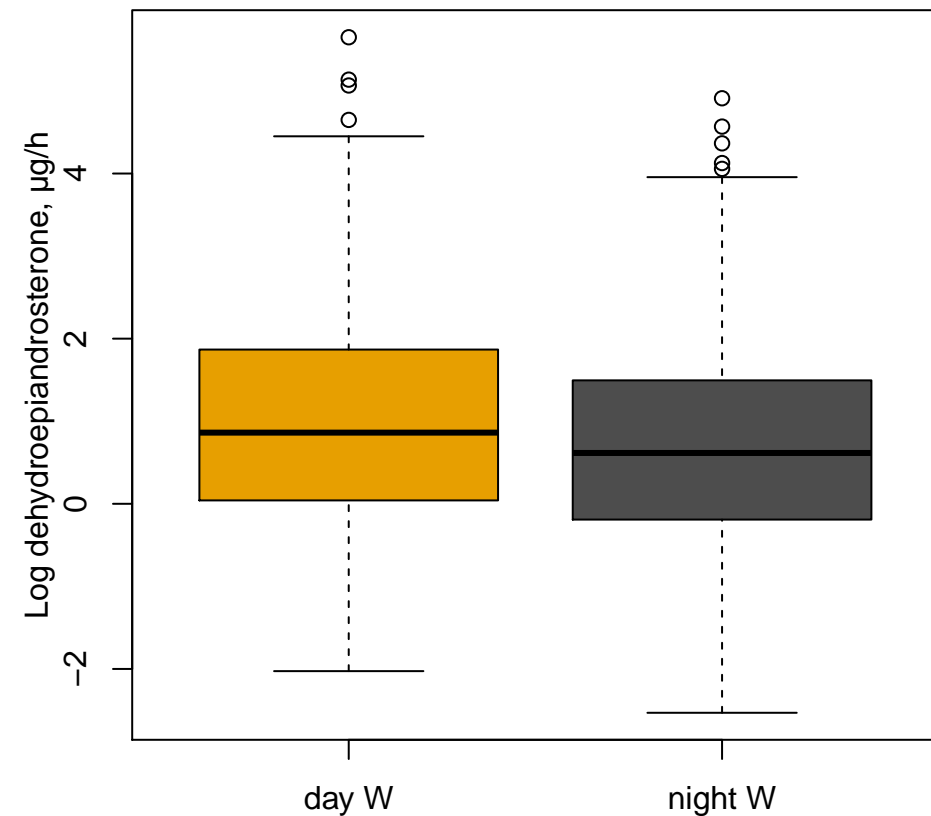

(g) M :  $\rho = 0.908$   $n = 437$

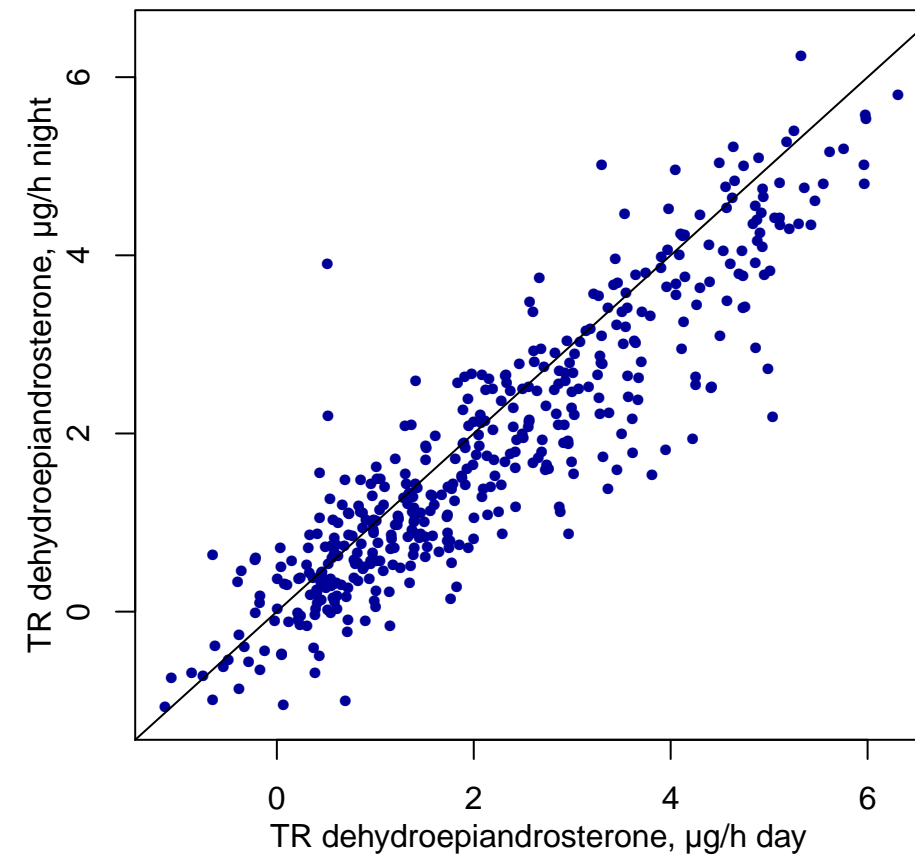

(h) W :  $\rho = 0.87$   $n = 377$

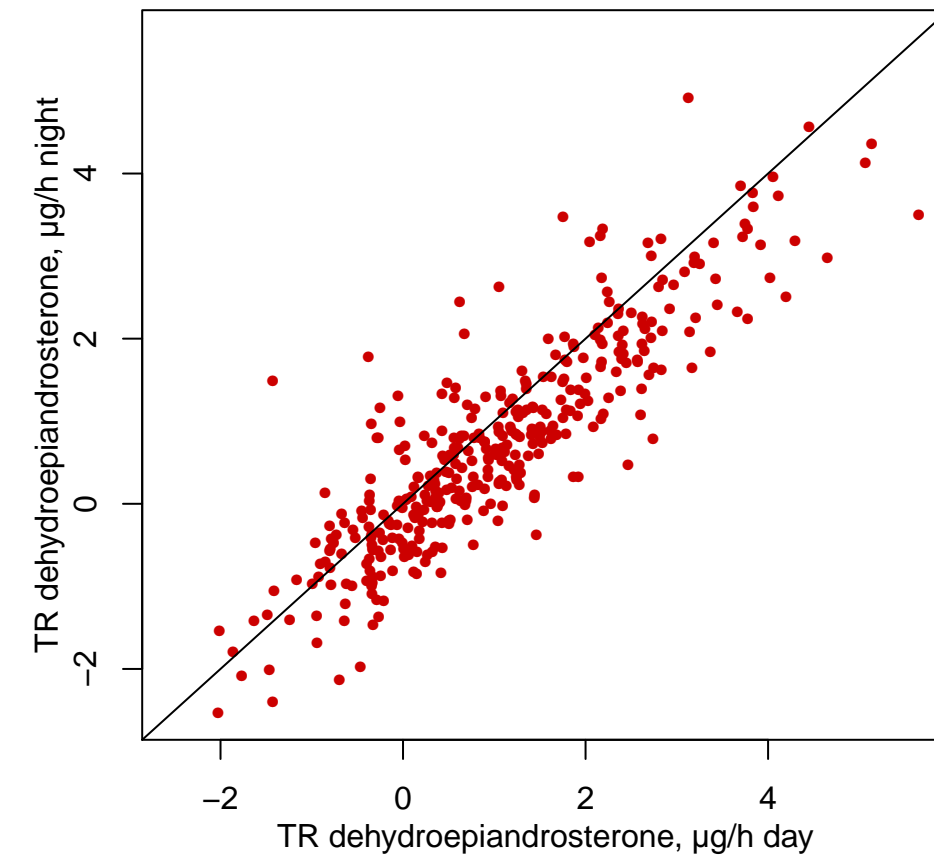

(a) M vs W:  $\delta = 0.82$   $p = 0$

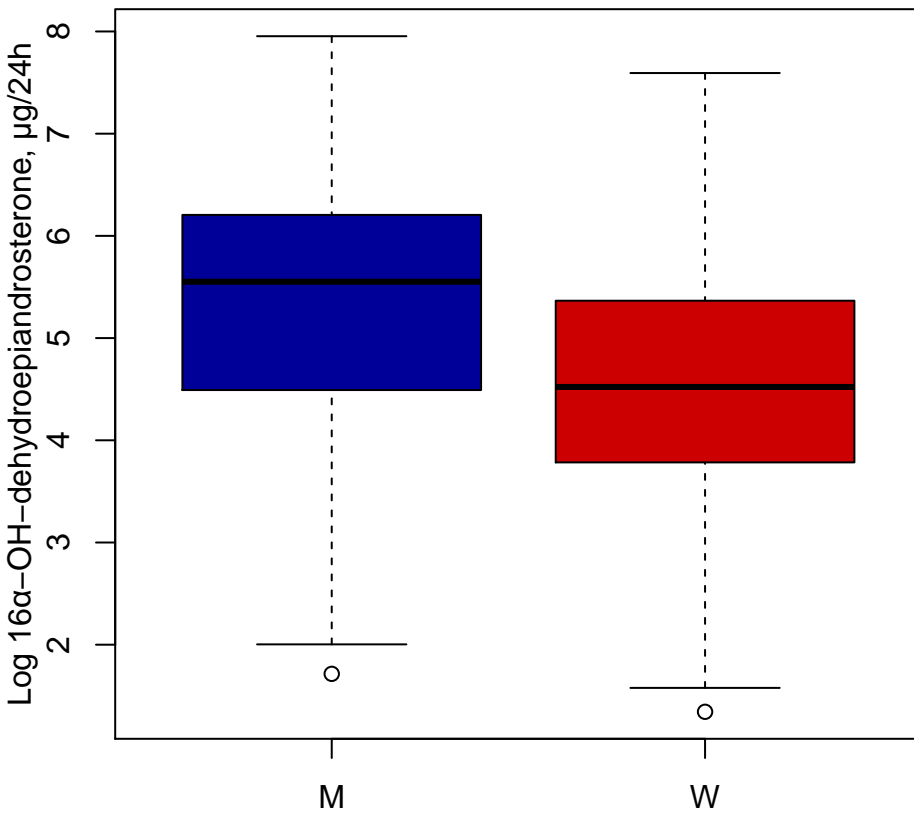

(b) M:  $p = 0$  W:  $p = 0$

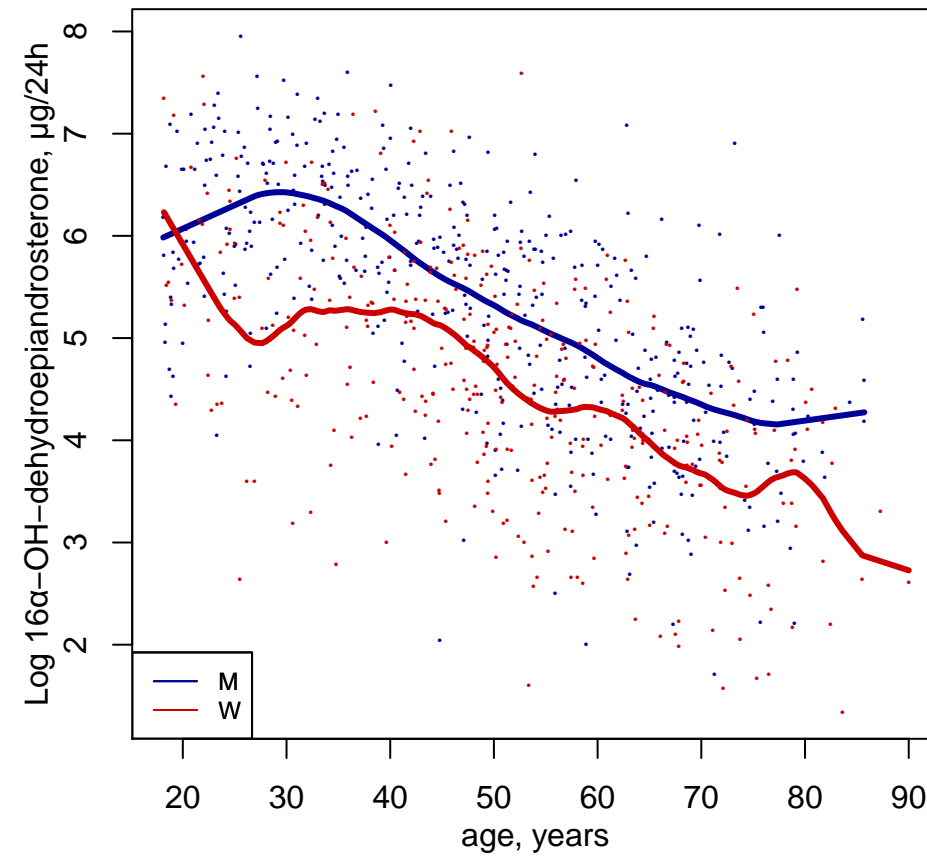

(c) TR= 0.2 nout= 0 sk= 0.09 ku= -0.66

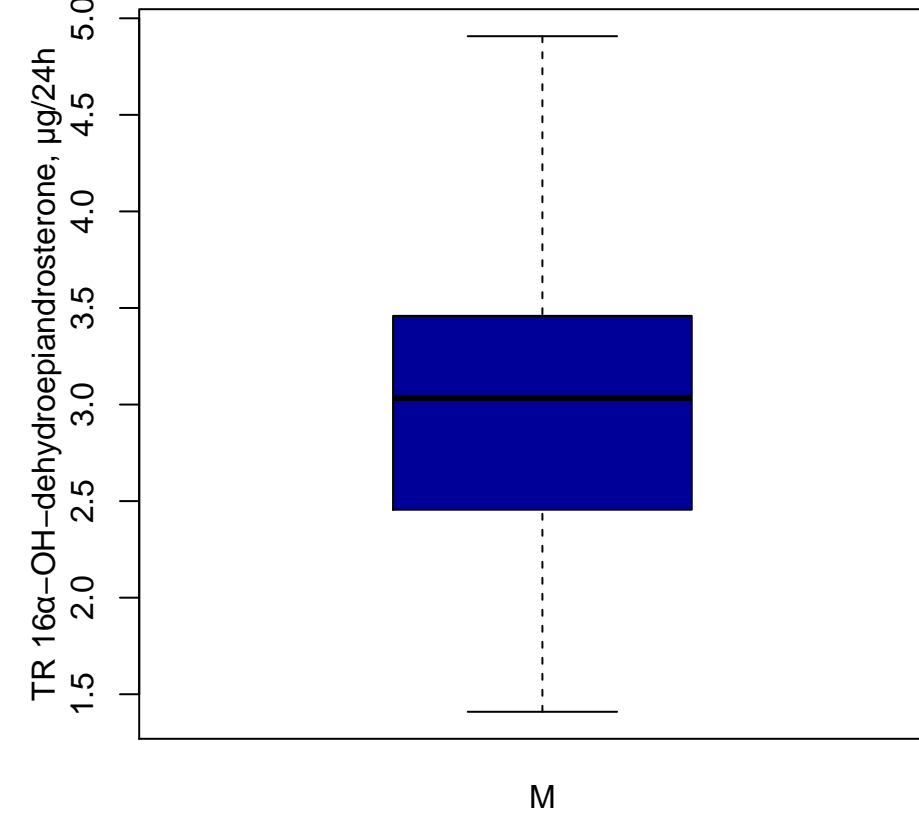

(d) TR= 0 nout= 0 sk= -0.07 ku= -0.66

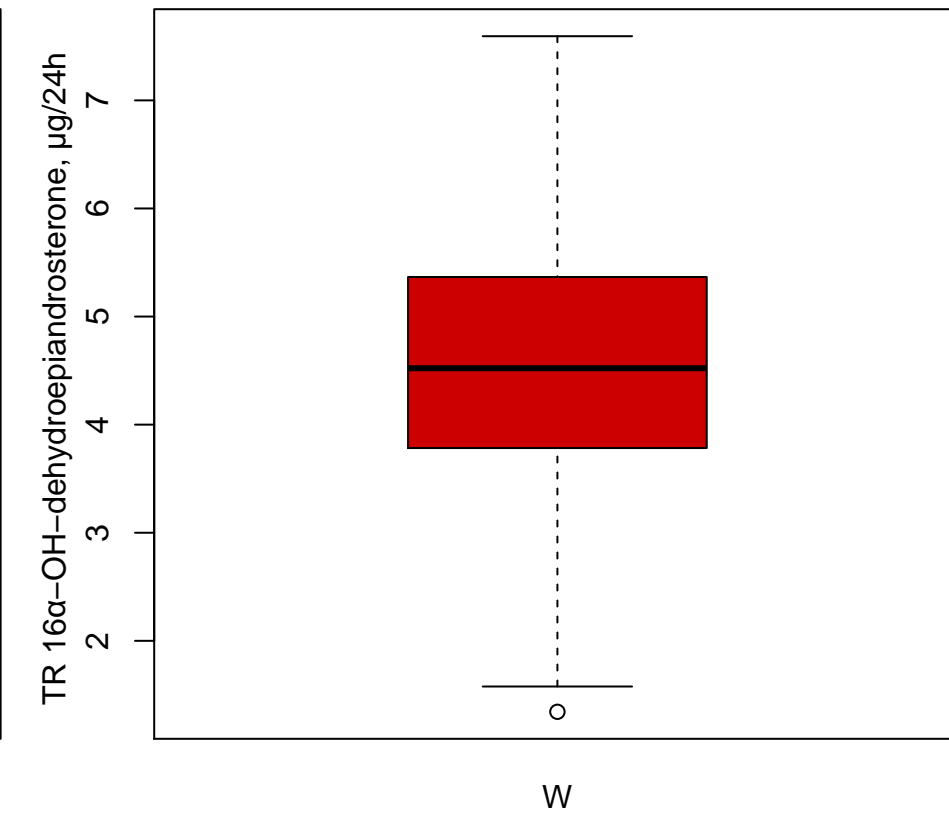

(e) D vs N:  $\delta = 0.14$   $p = 0$

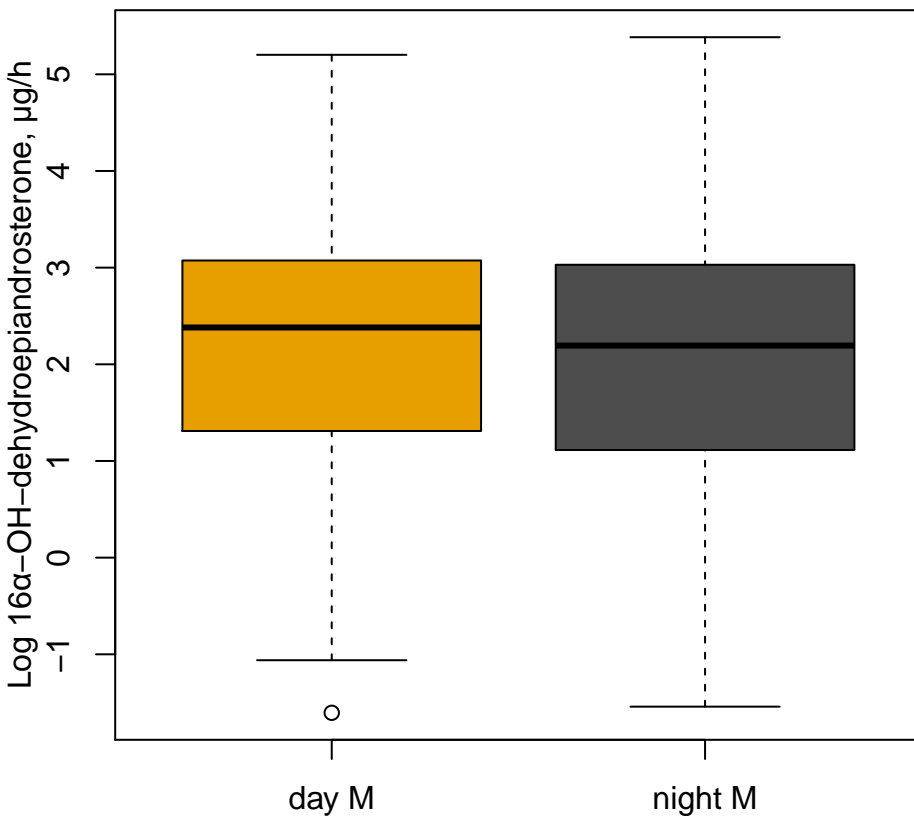

(f) D vs N:  $\delta = 0.07$   $p = 0$

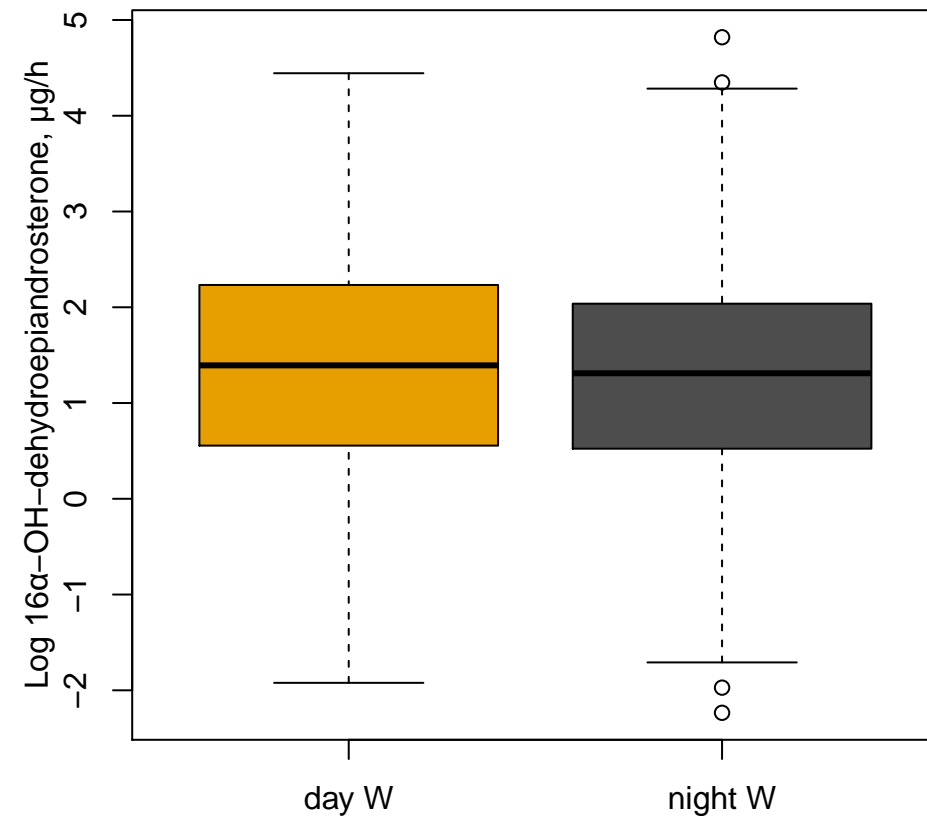

(g) M :  $\rho = 0.863$   $n = 446$

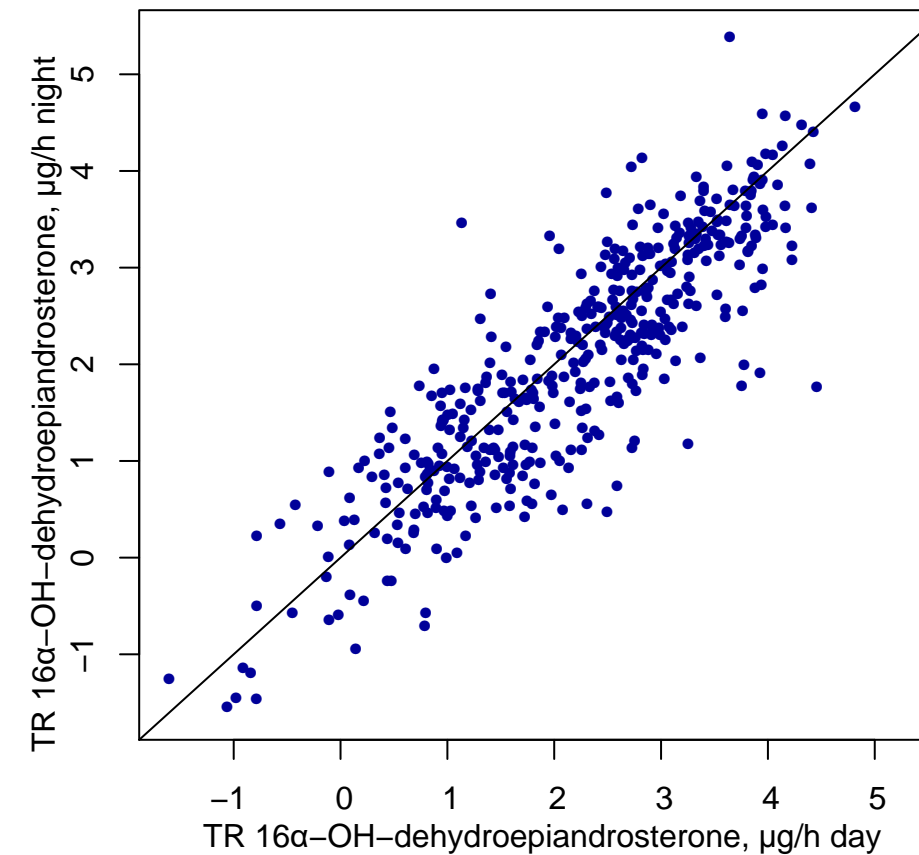

(h) W :  $\rho = 0.891$   $n = 379$

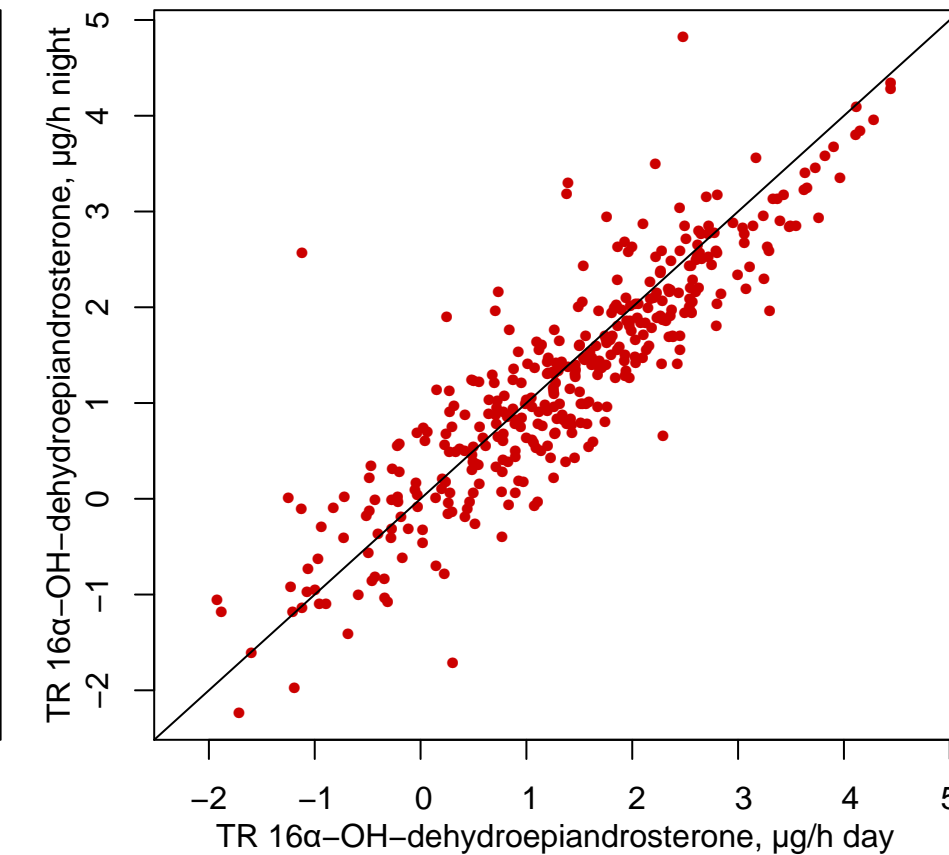



(a) M vs W: delta= 0.92 p = 0

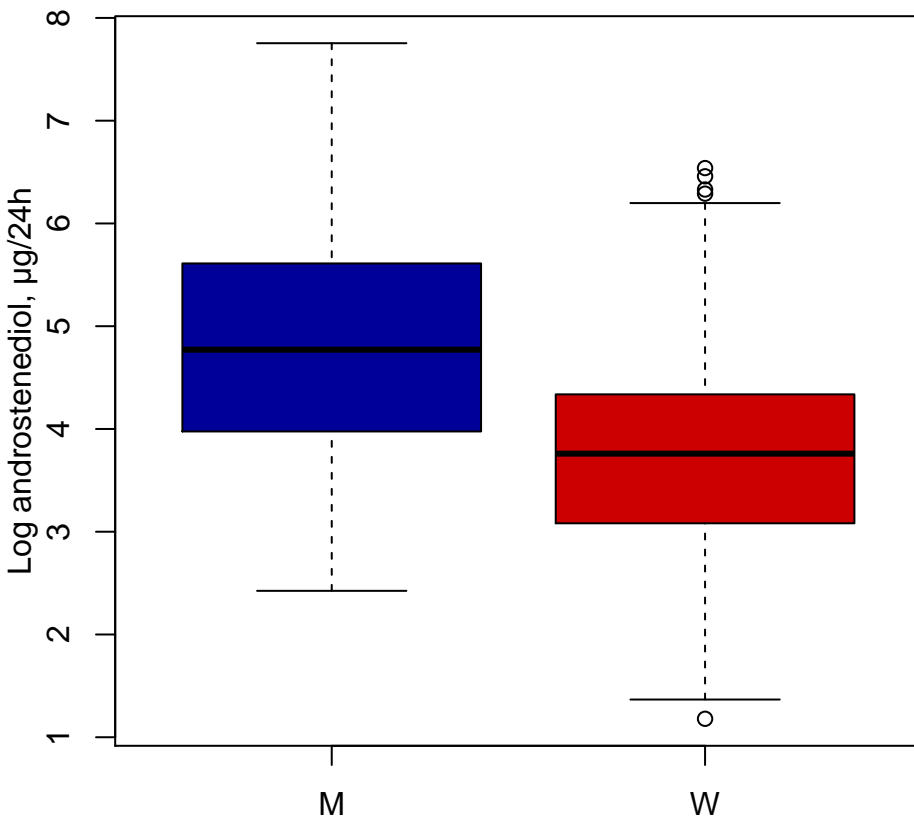

(b) M: p = 0 W: p = 0

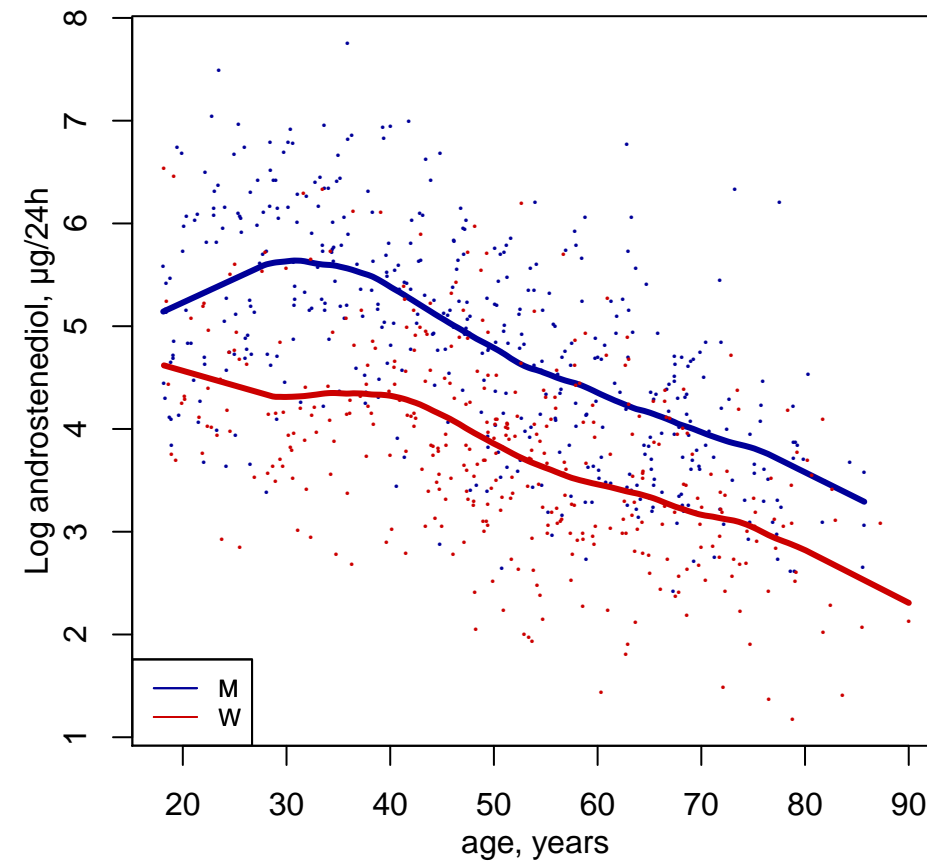

(c) TR= -0.1 nout= 0 sk= -0.09 ku= -0.73

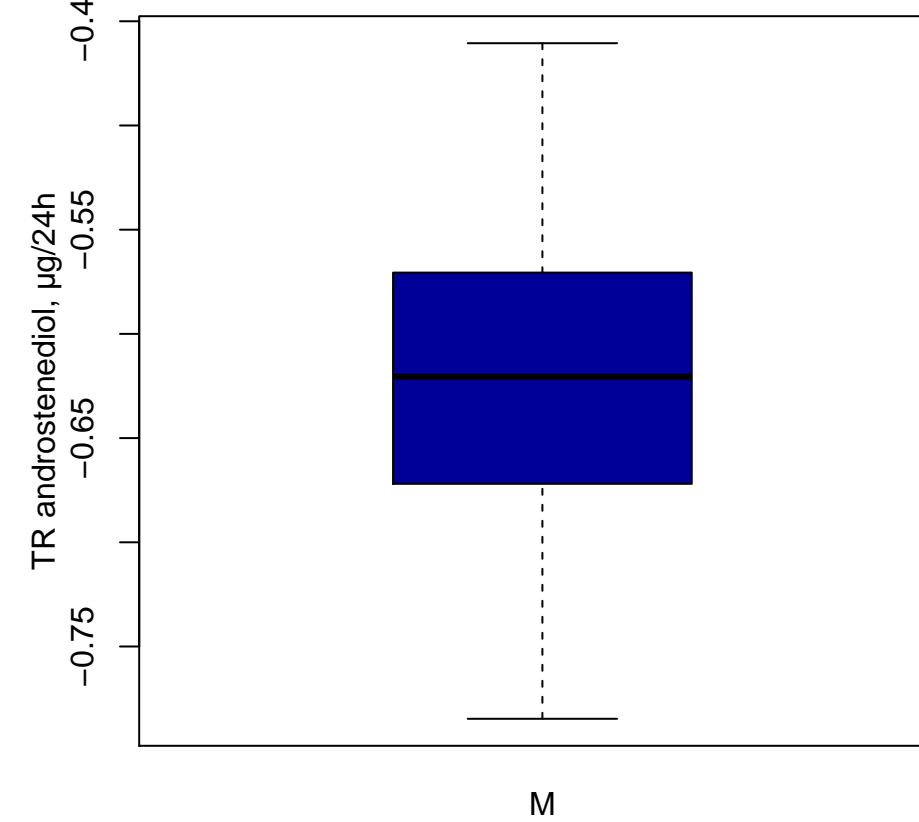

(d) TR= -0.1 nout= 0 sk= -0.1 ku= -0.73

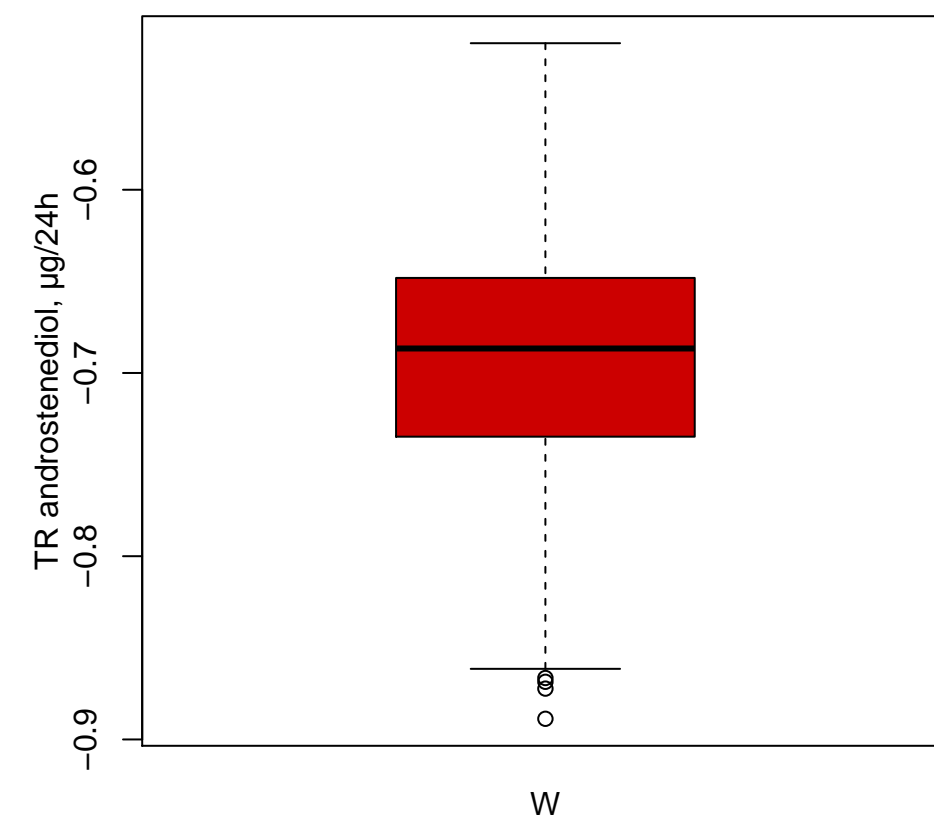

(e) D vs N: delta= 0.04 p = 0

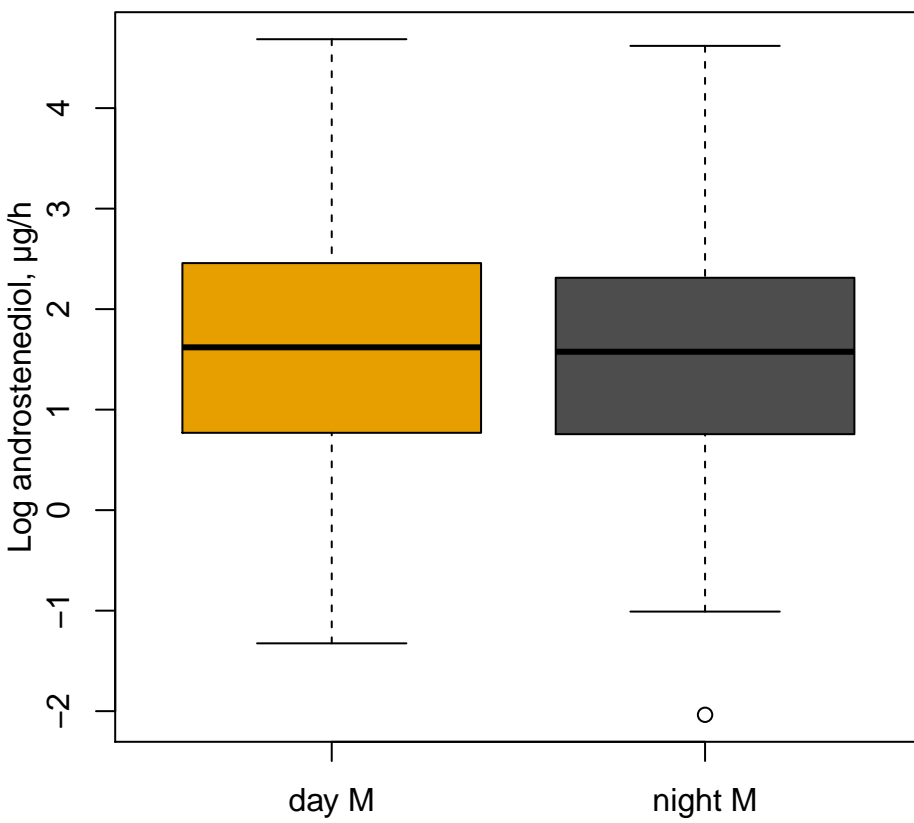

(f) D vs N: delta= 0.12 p = 0

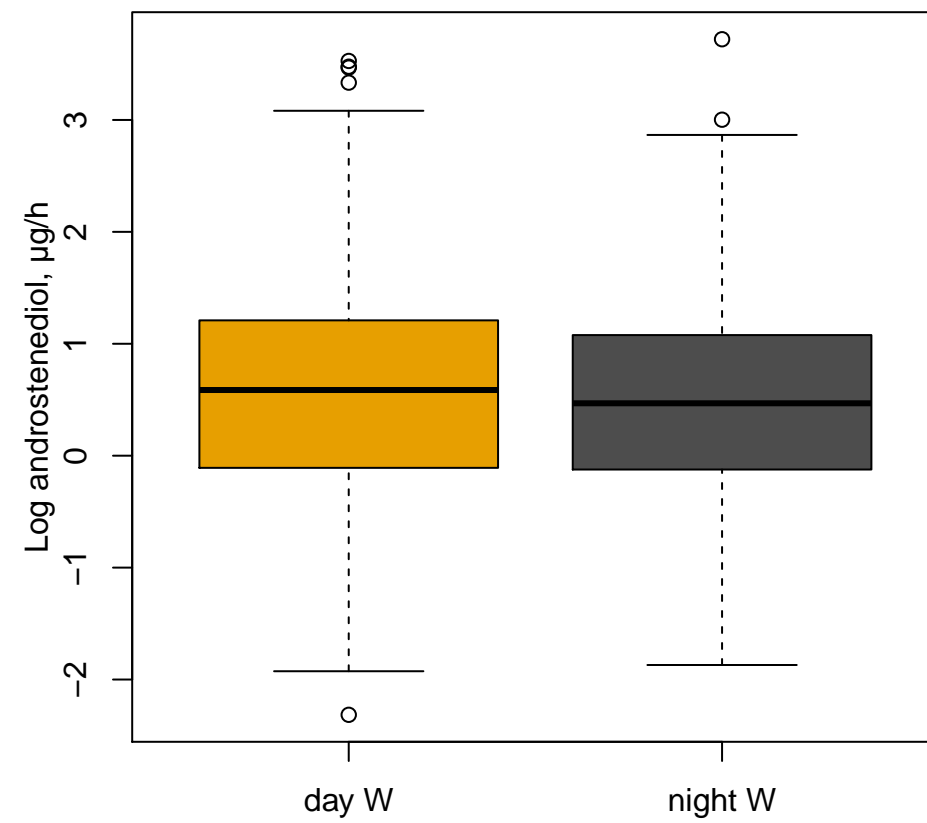

(g) M : rho= 0.893 n= 451

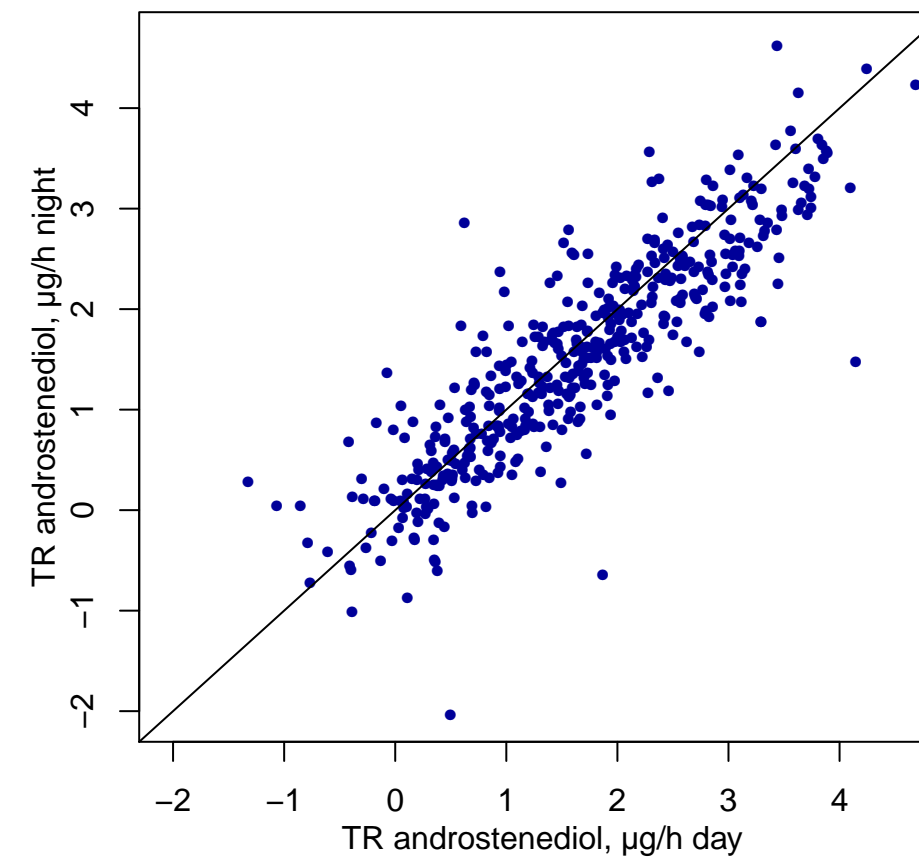

(h) W : rho= 0.861 n= 378

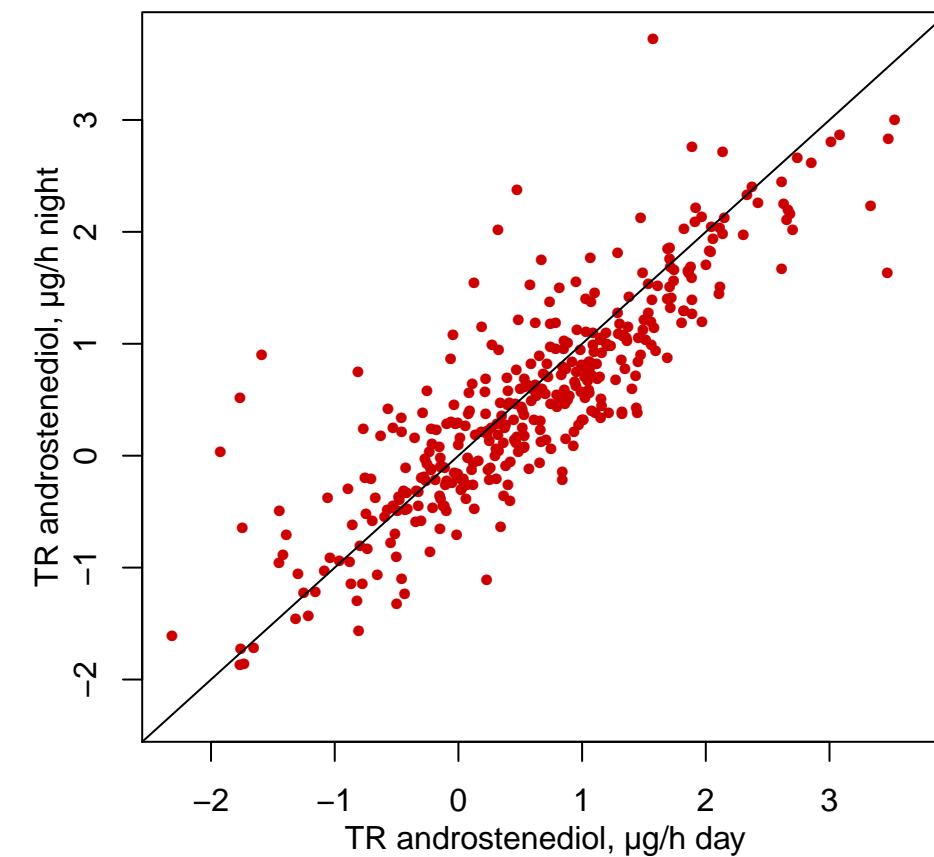

(a) M vs W: delta= 1.16 p = 0

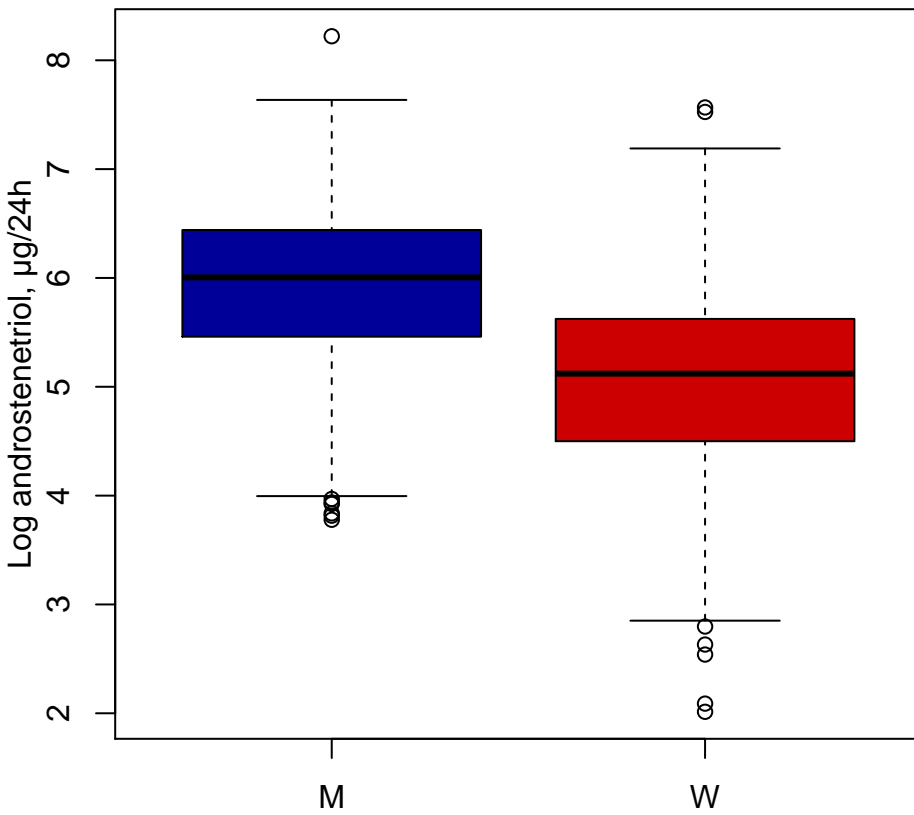

(b) M: p = 0 W: p = 0

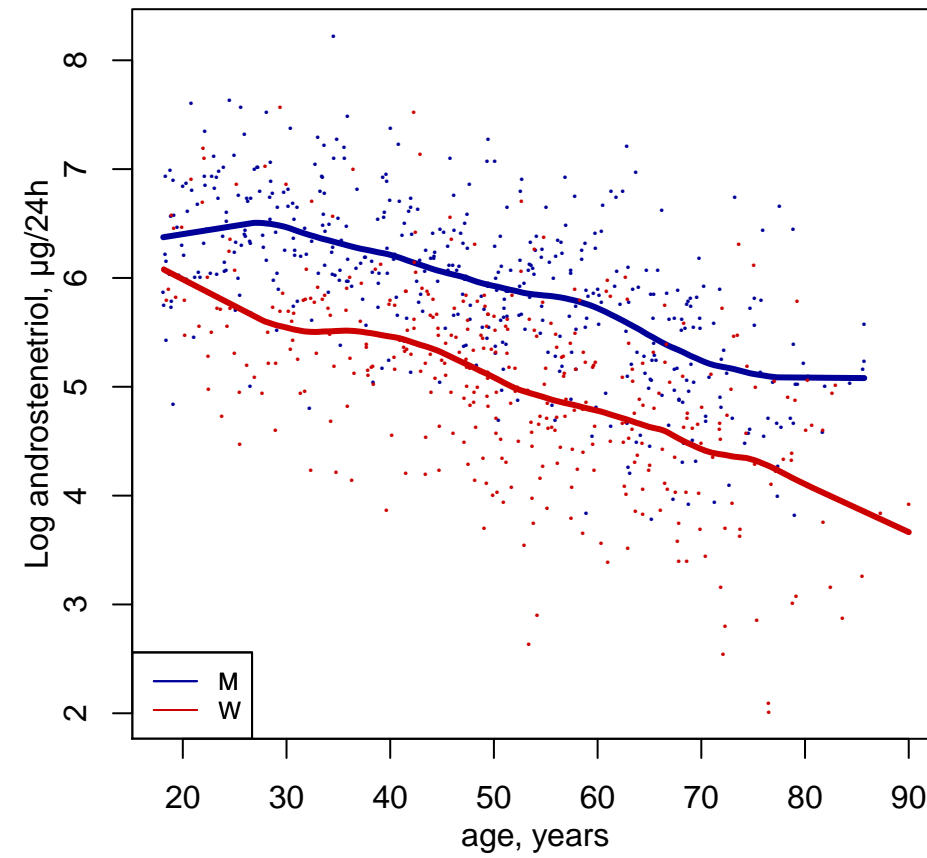

(c) TR= 0.1 nout= 0 sk= -0.1 ku= -0.13

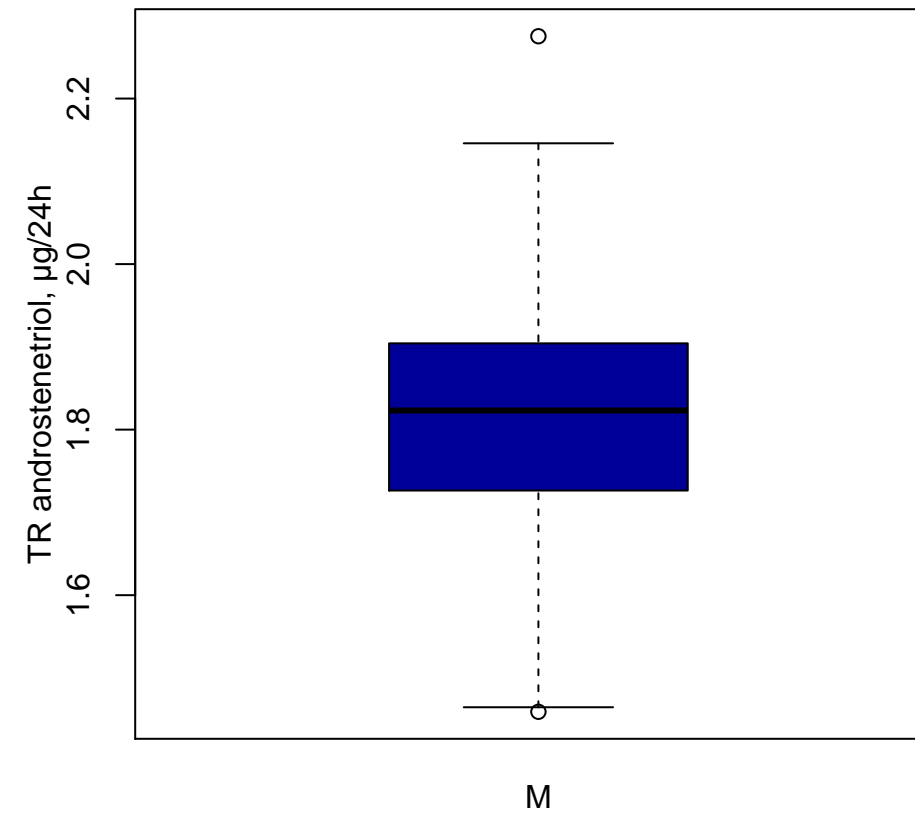

(d) TR= 0.1 nout= 0 sk= 0.04 ku= -0.13

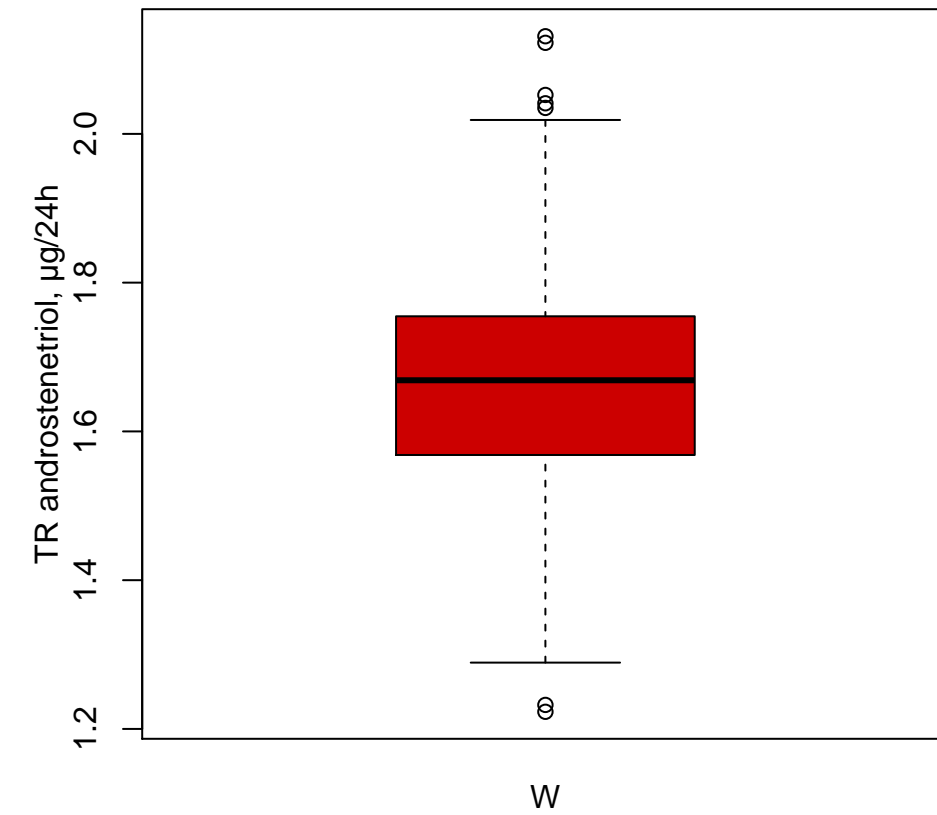

(e) D vs N: delta= 0.04 p = 0.61

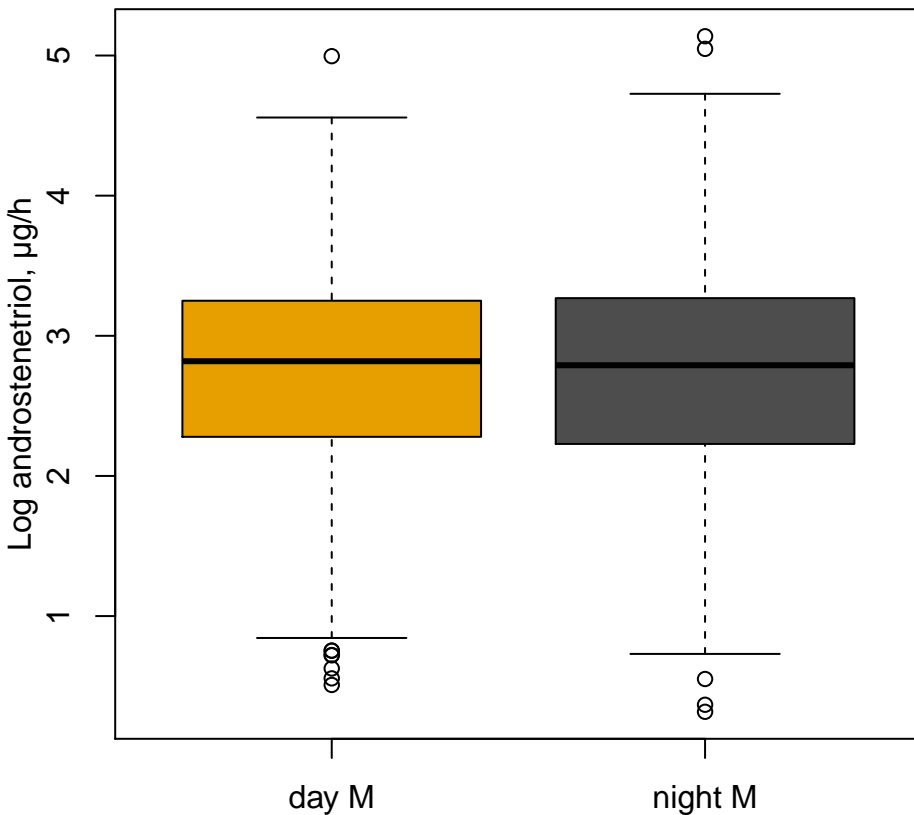

(f) D vs N: delta= -0.05 p = 0.3

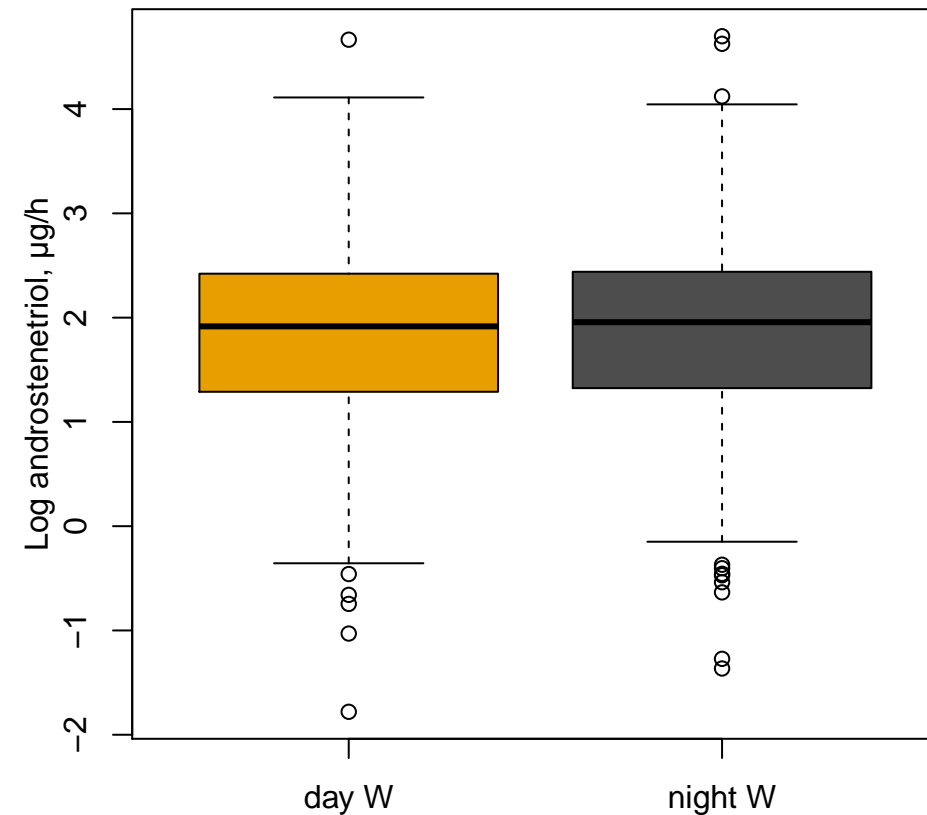

(g) M : rho= 0.828 n= 454

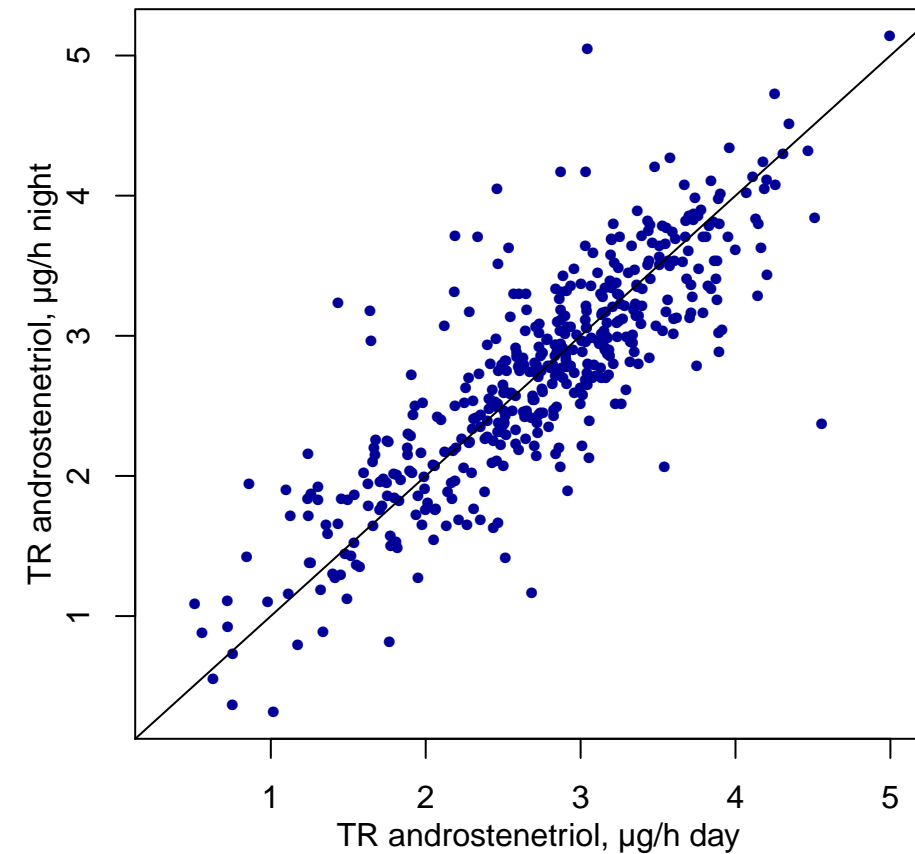

(h) W : rho= 0.881 n= 378

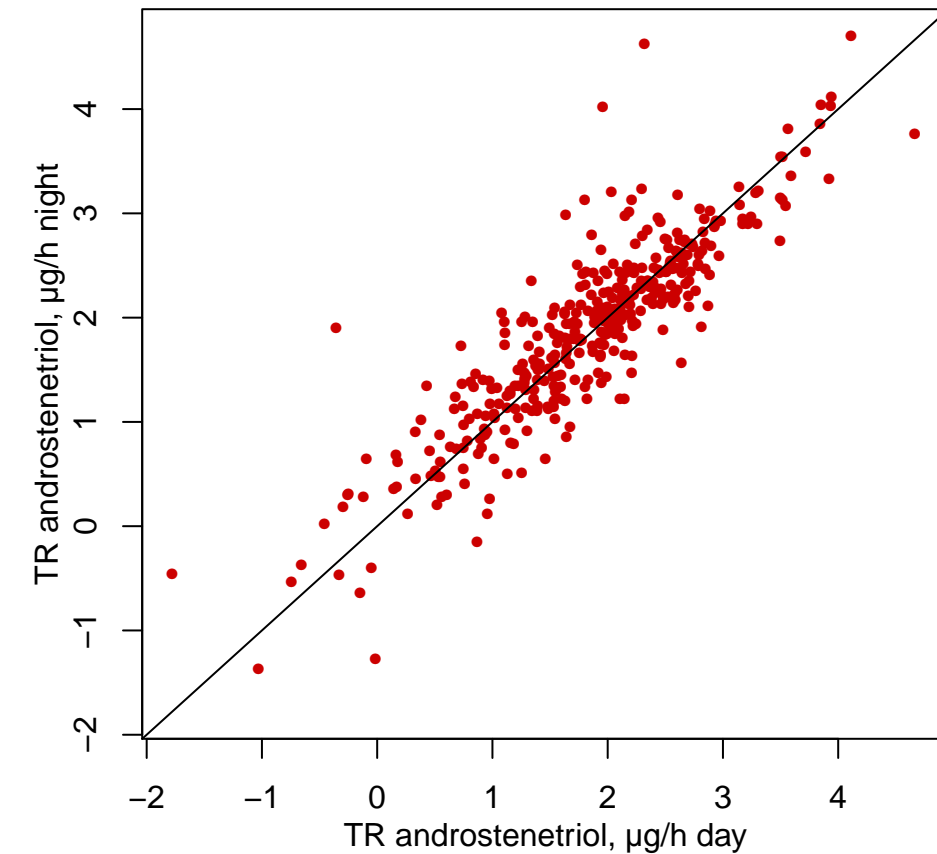

(a) M vs W: delta= 2.53 p = 0

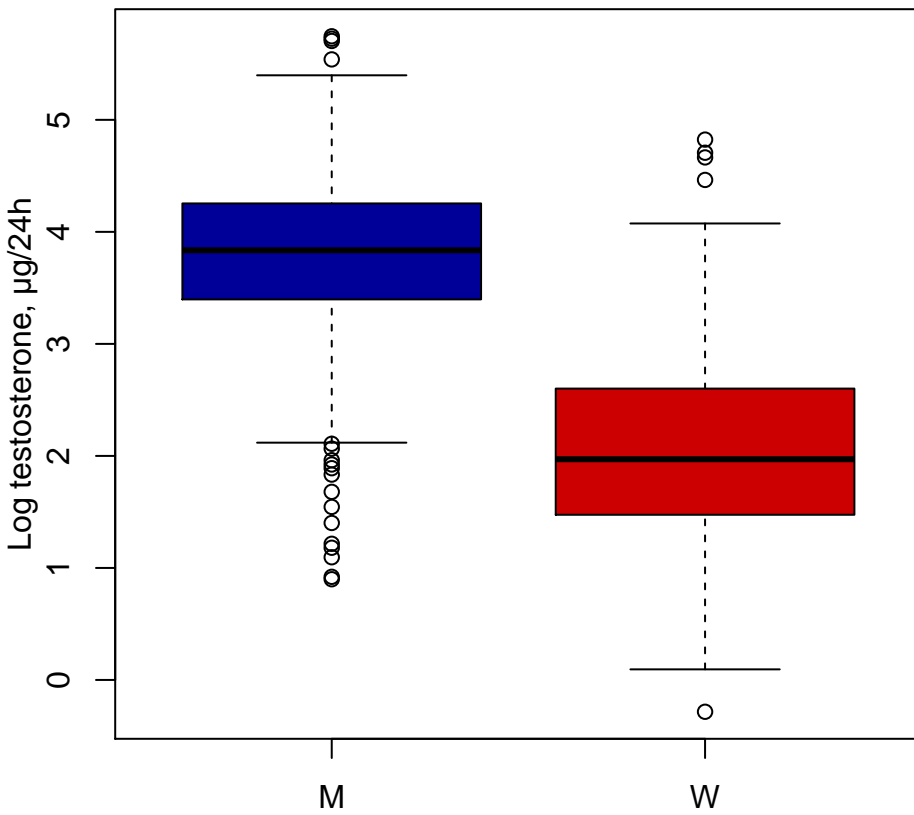

(b) M: p = 0 W: p = 0

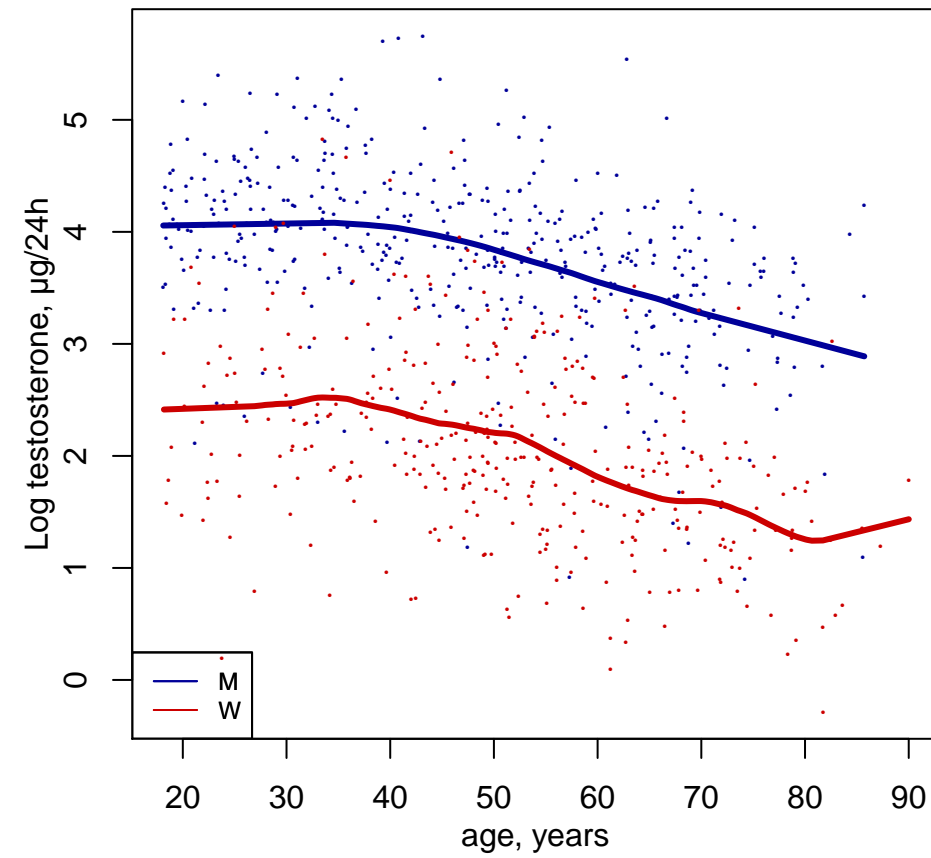

(c) TR= 0.2 nout= 0 sk= -0.03 ku= 0.71

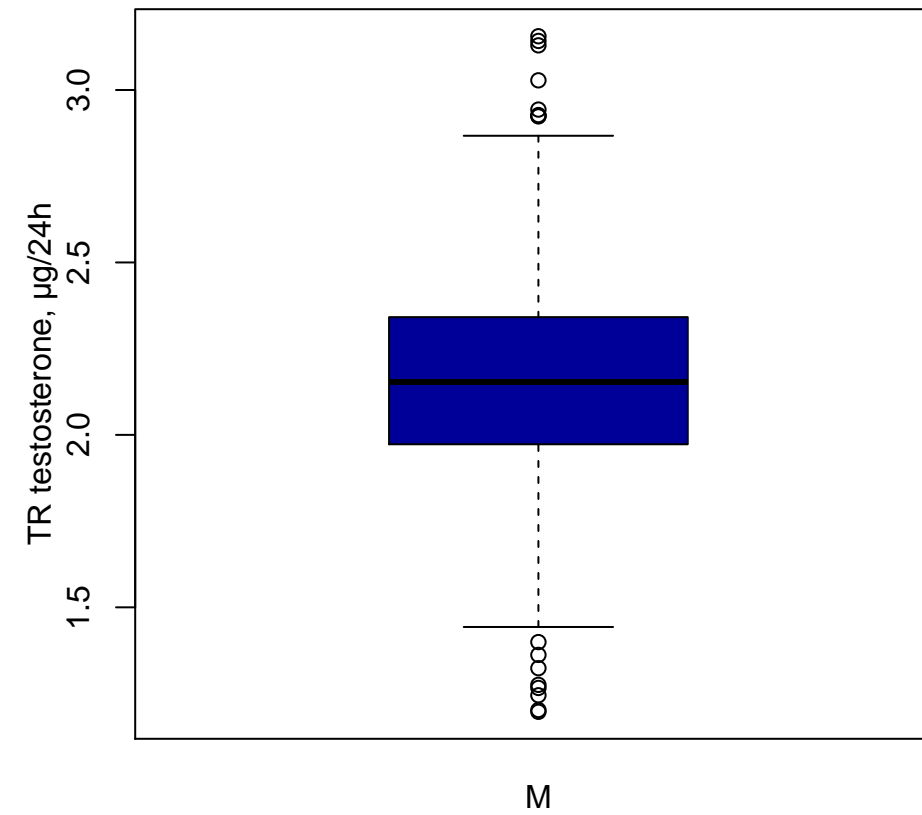

(d) TR= -0.1 nout= 0 sk= 0.09 ku= 0.71

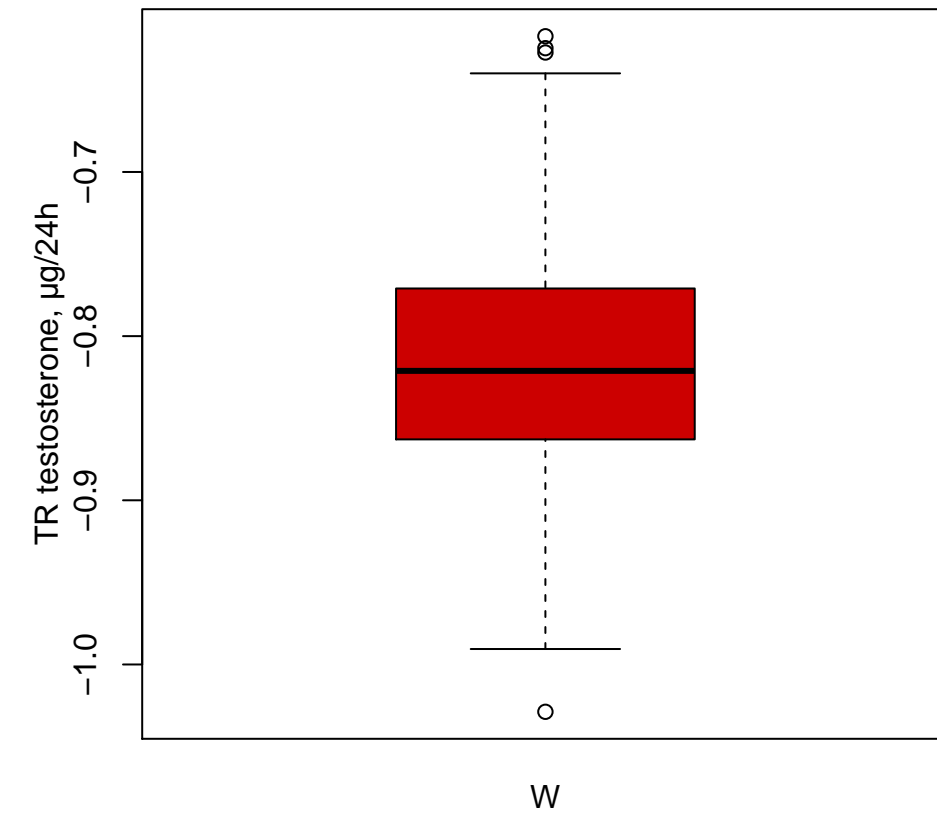

(e) D vs N: delta= -0.08 p = 0.009

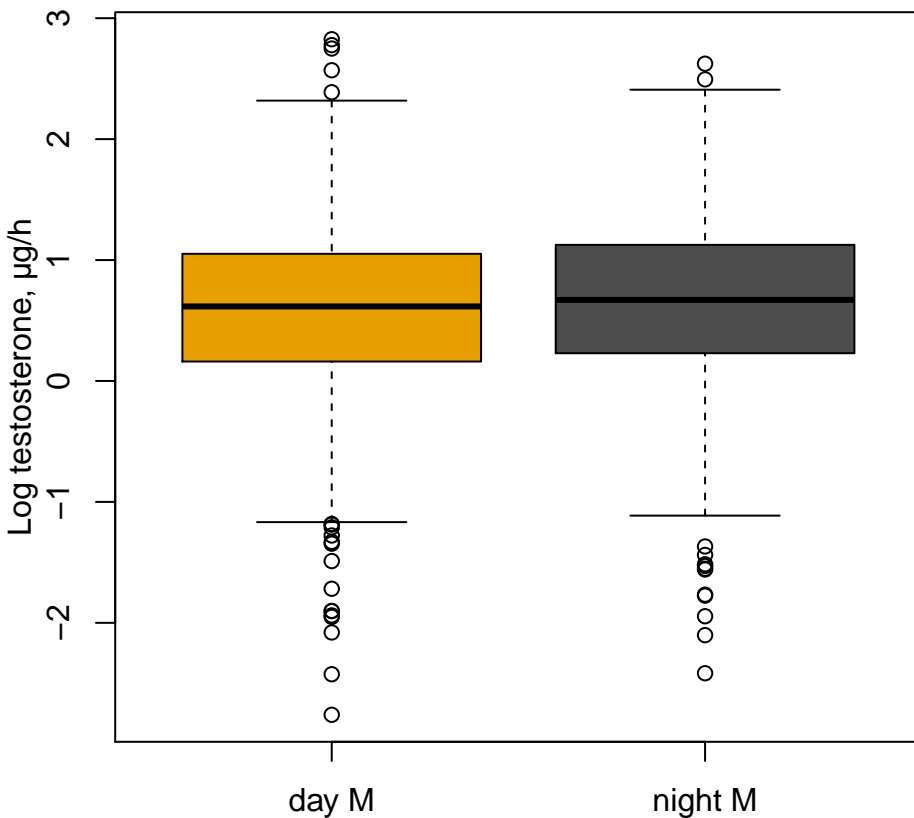

(f) D vs N: delta= 0.04 p = 0.055

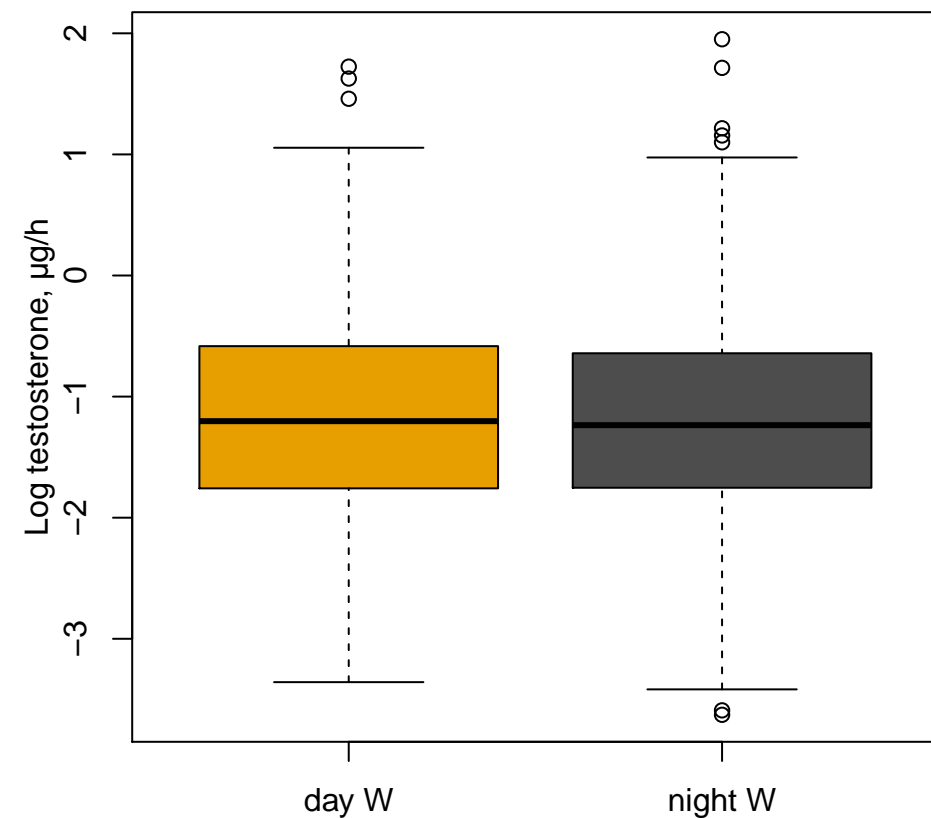

(g) M : rho= 0.744 n= 449

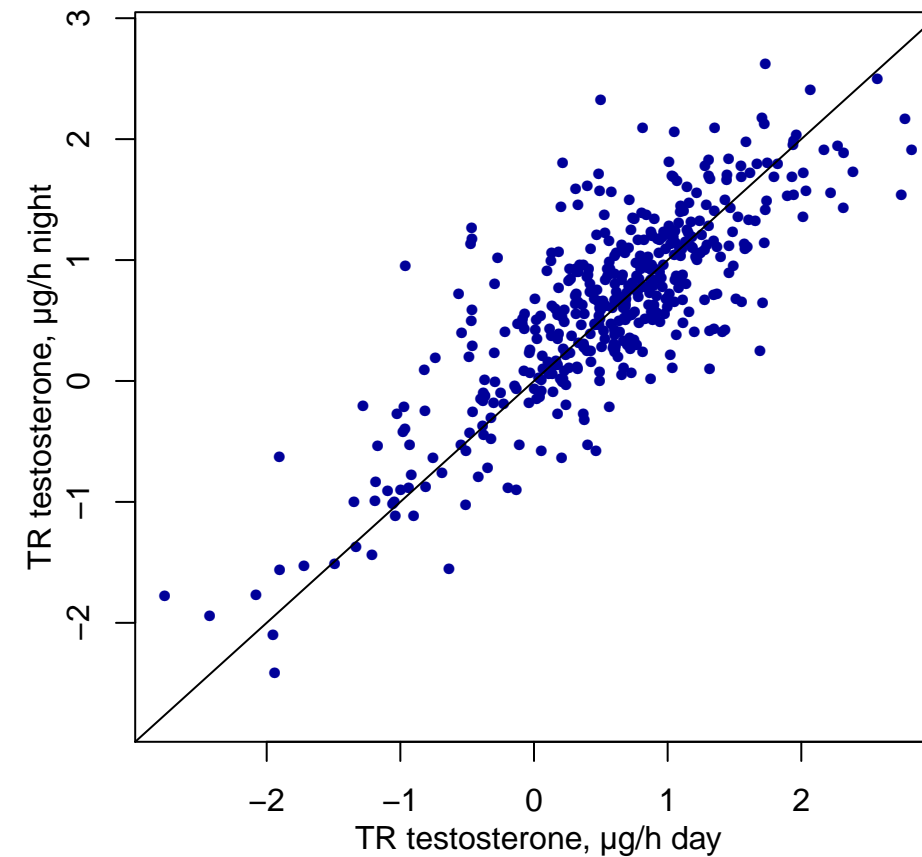

(h) W : rho= 0.795 n= 367

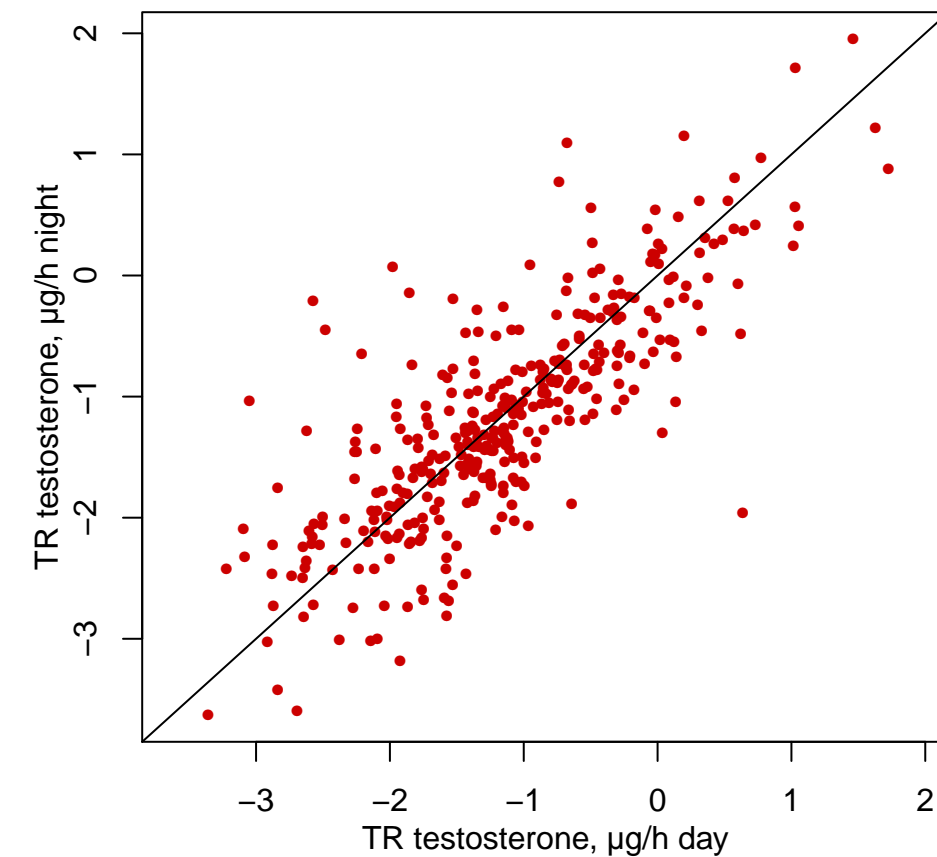

(a) M vs W:  $\delta = 1.32$   $p = 0$

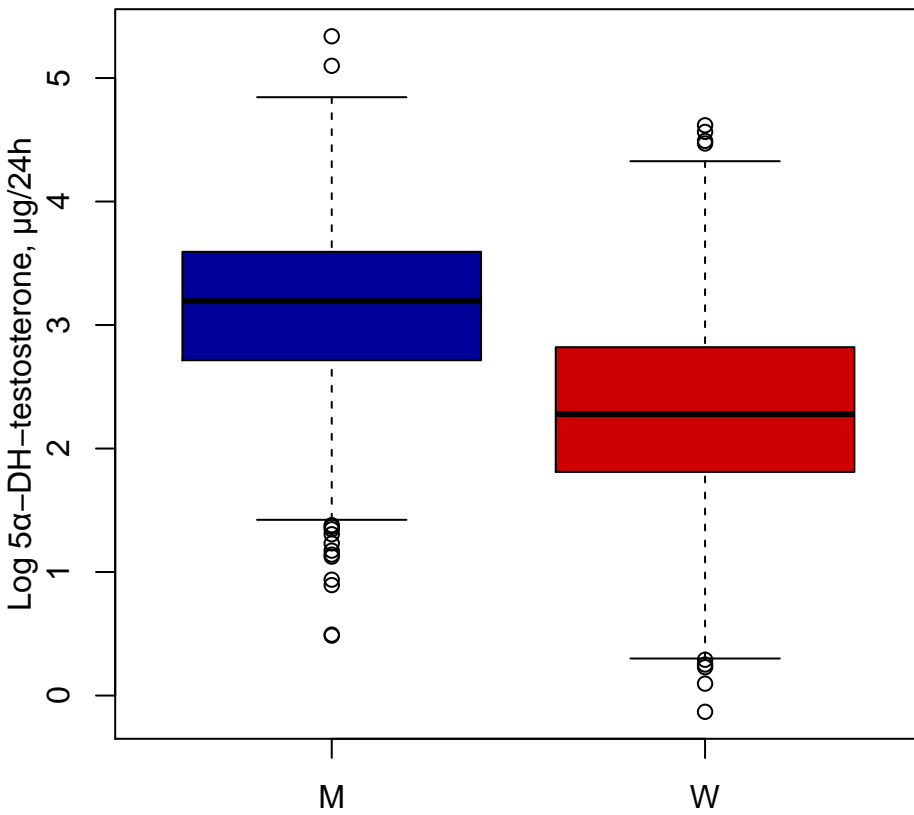

(b) M:  $p = 0$  W:  $p = 0$

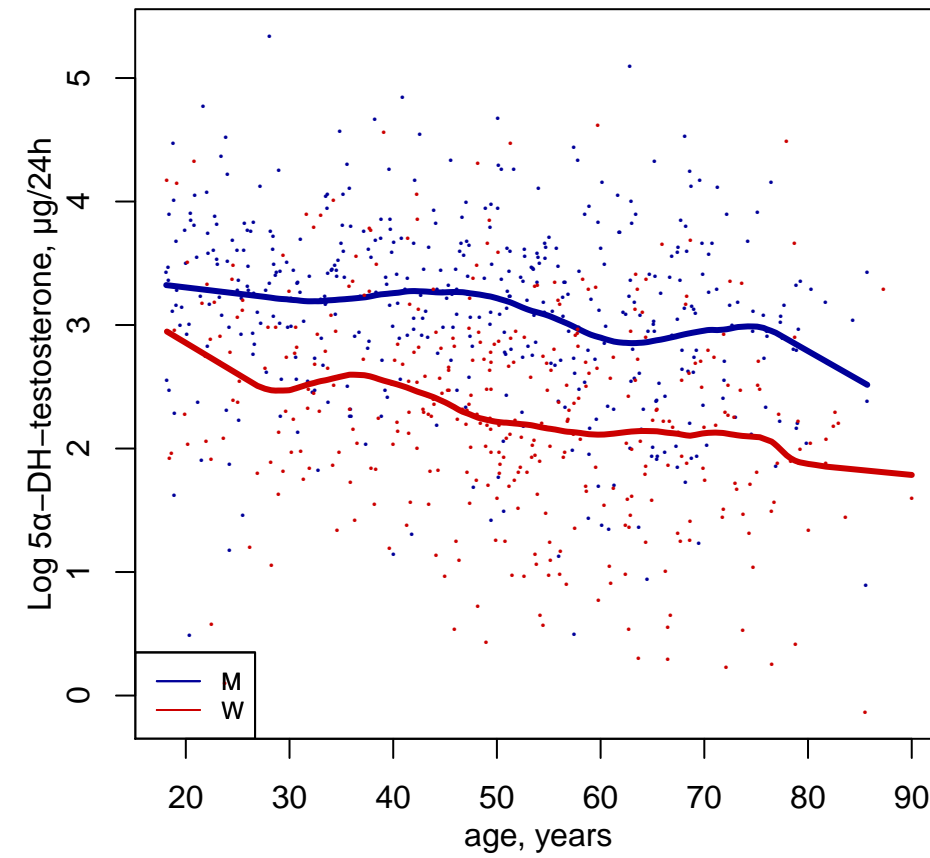

(c) TR= 0.2 nout= 1 sk= -0.05 ku= 0.27

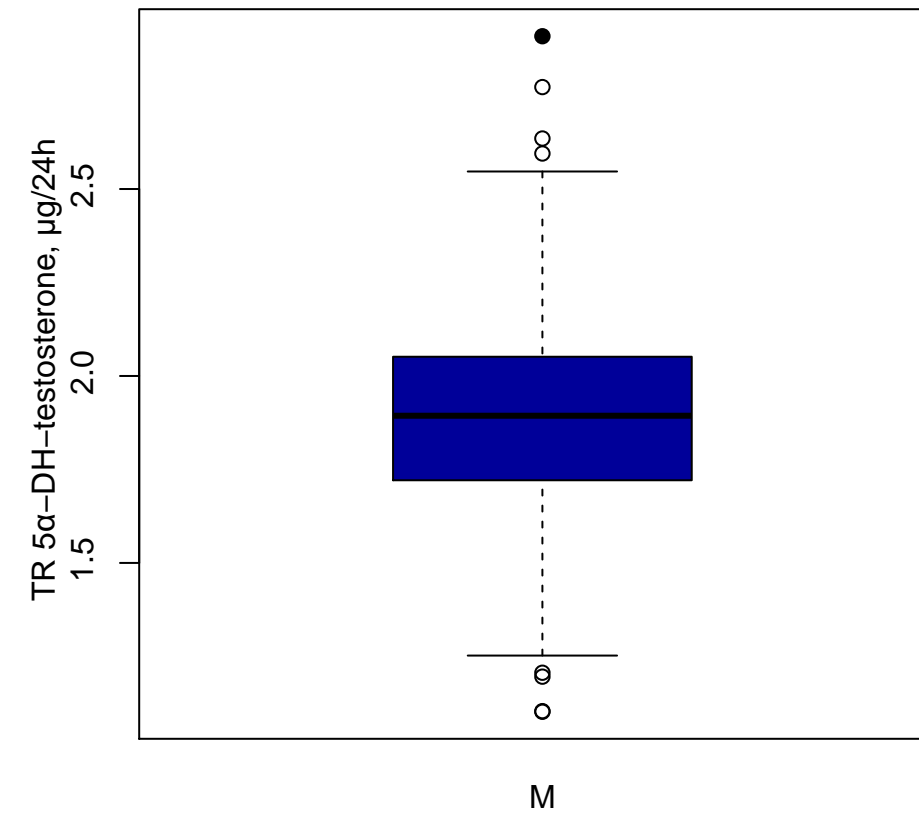

(d) TR= 0 nout= 0 sk= -0.02 ku= 0.27

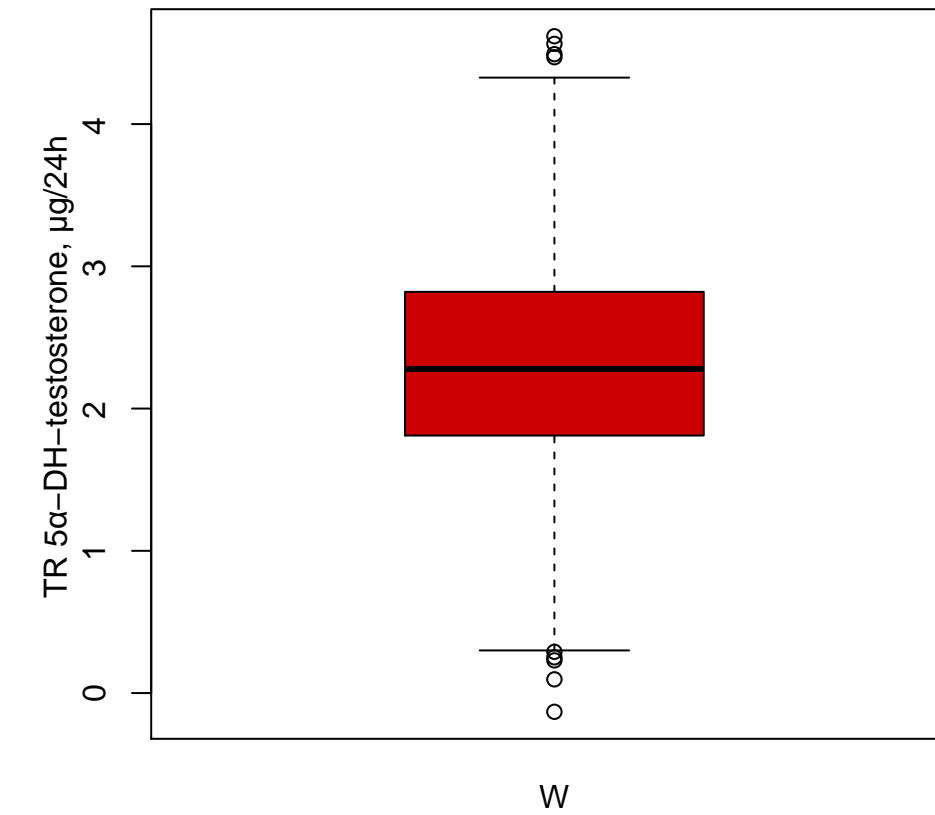

(e) D vs N:  $\delta = 0.24$   $p = 0$

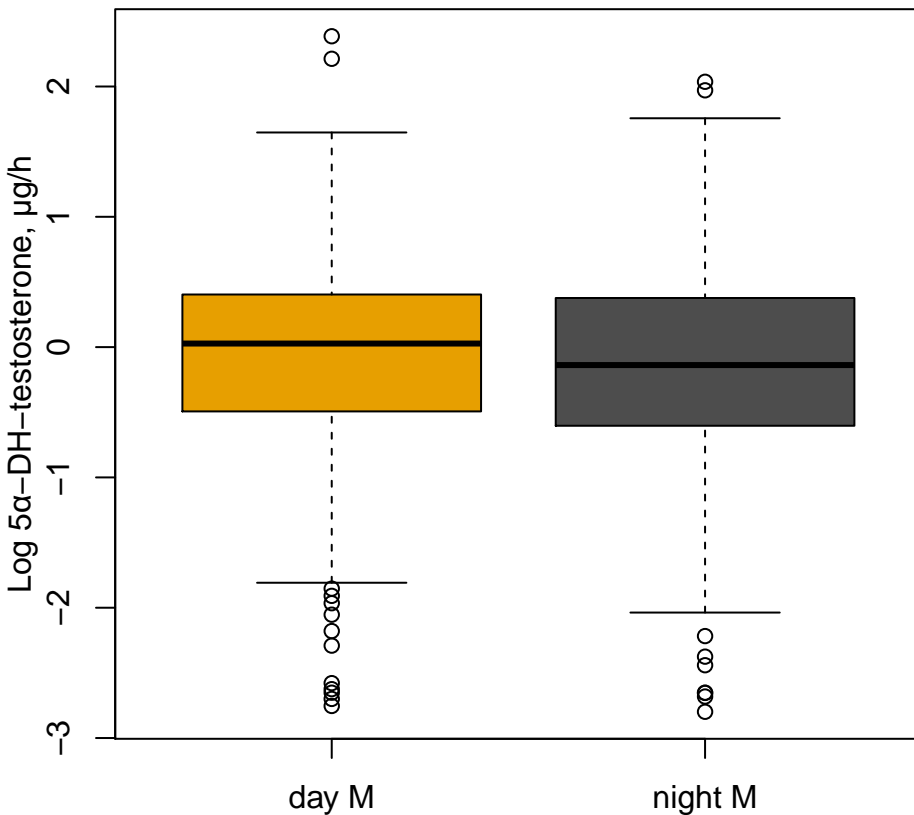

(f) D vs N:  $\delta = 0.29$   $p = 0$

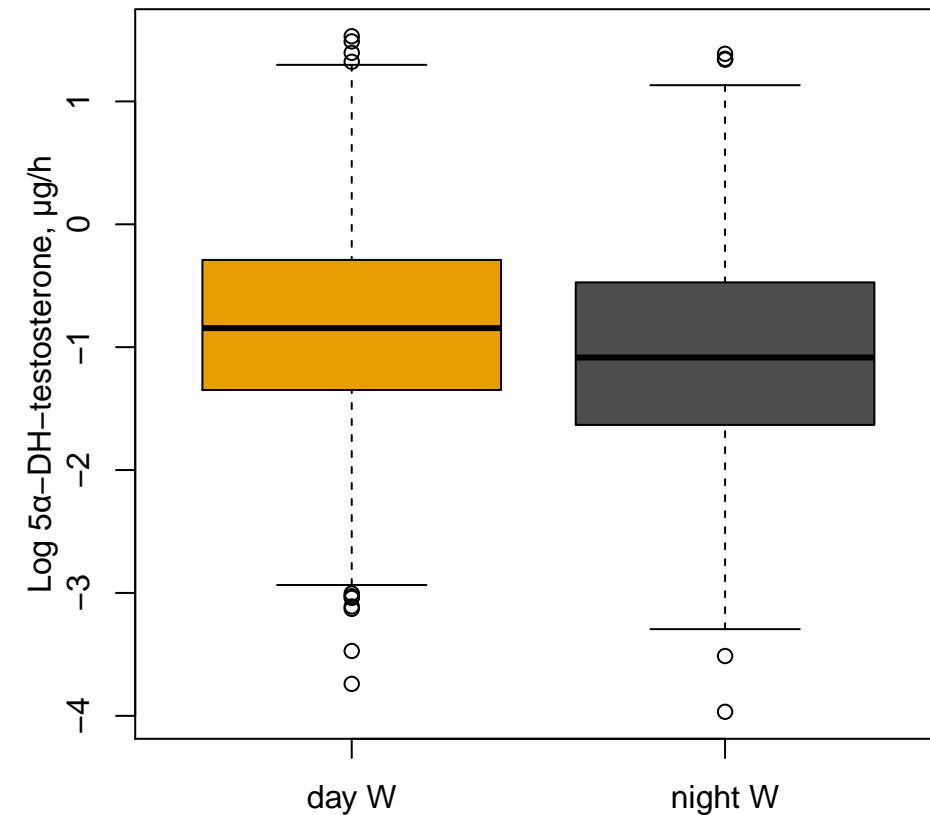

(g) M :  $\rho = 0.733$   $n = 454$

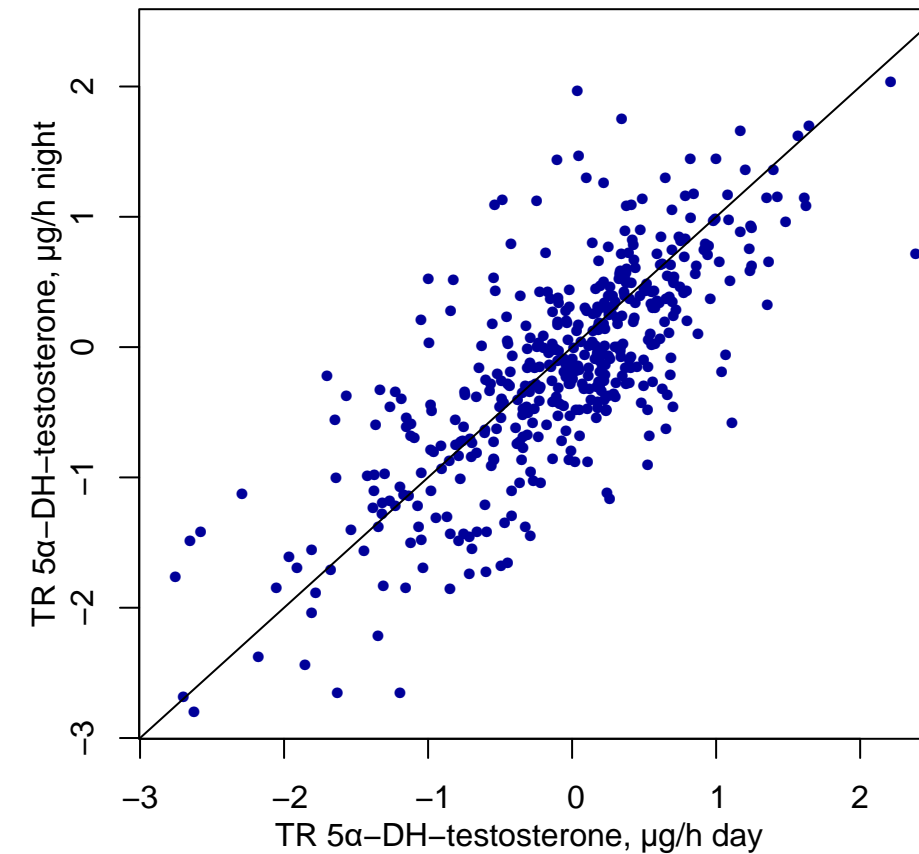

(h) W :  $\rho = 0.789$   $n = 377$

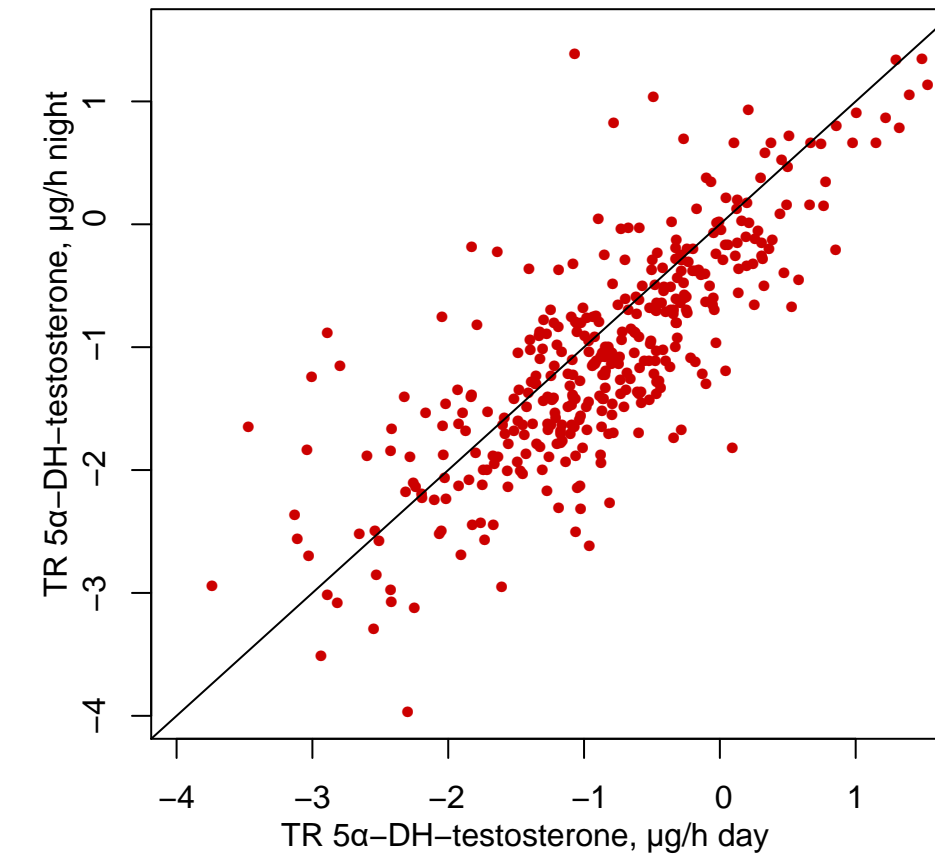

(a) M vs W: delta= 2.2 p = 0

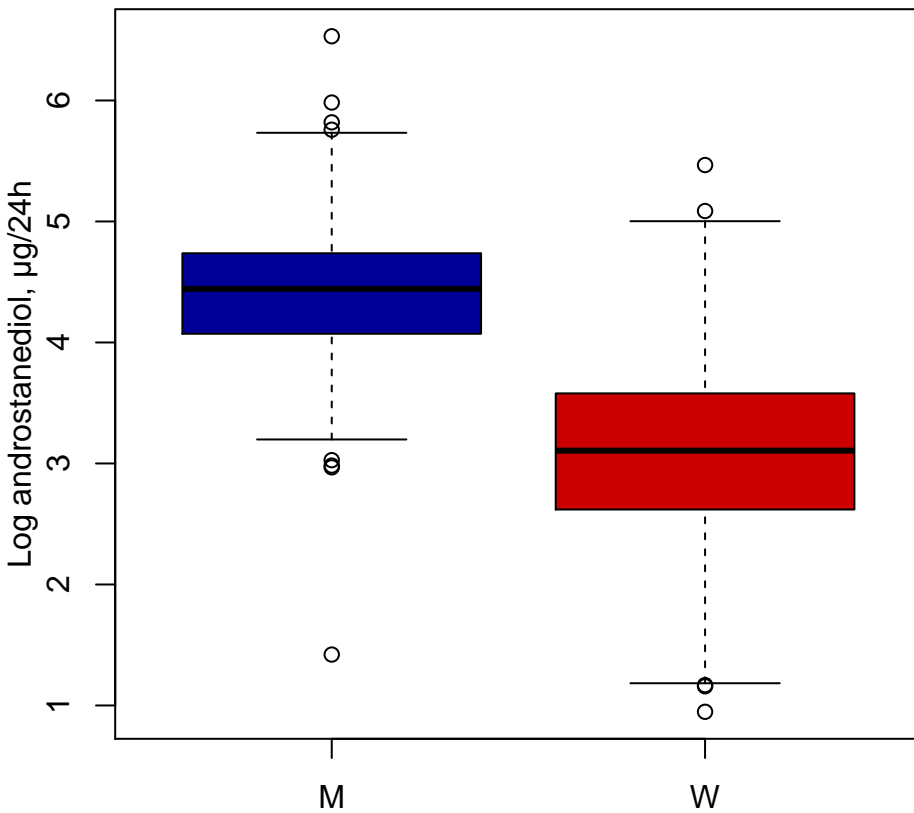

(b) M: p = 0 W: p = 0

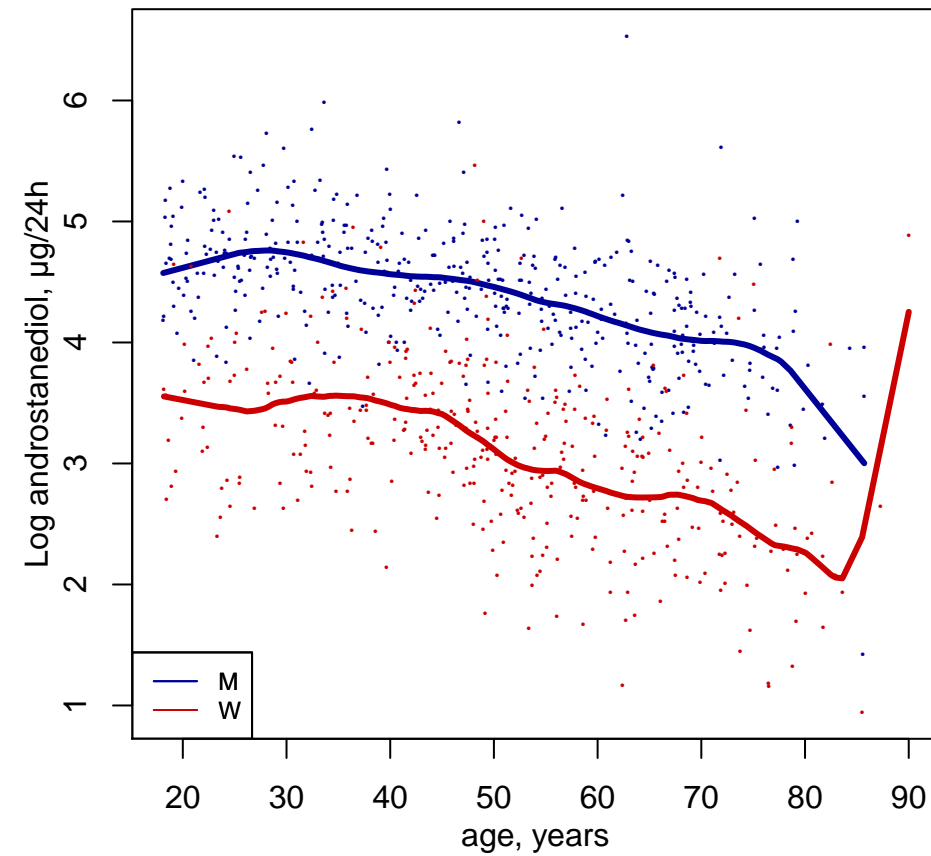

(c) TR= 0.1 nout= 2 sk= 0.05 ku= 0.09

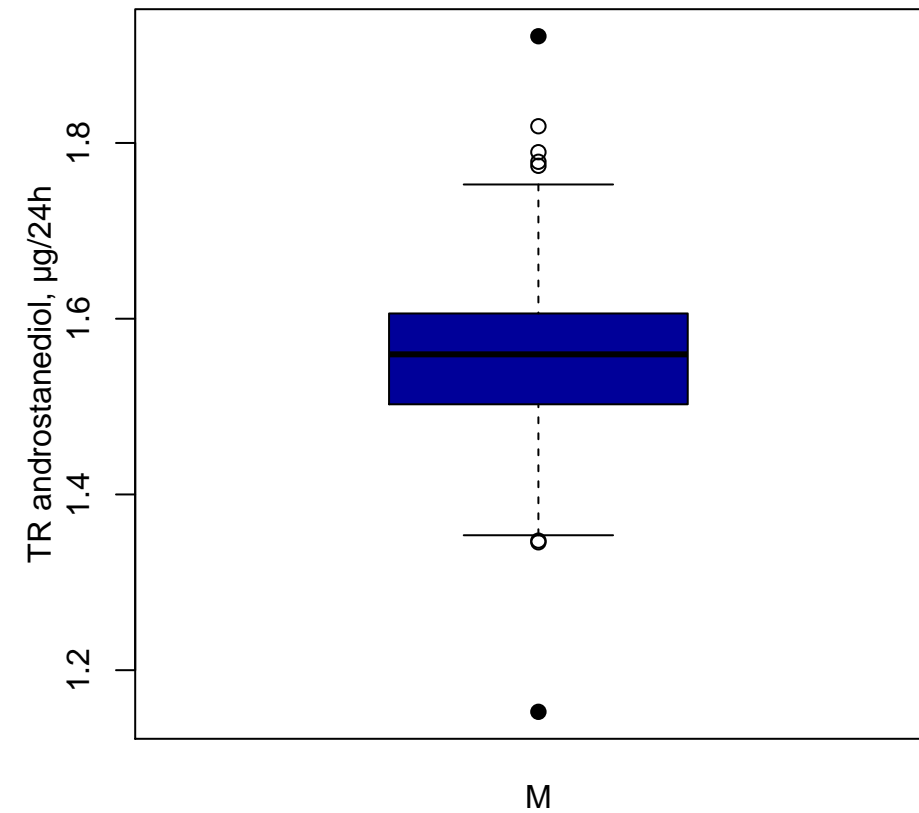

(d) TR= 0 nout= 0 sk= 0.07 ku= 0.09

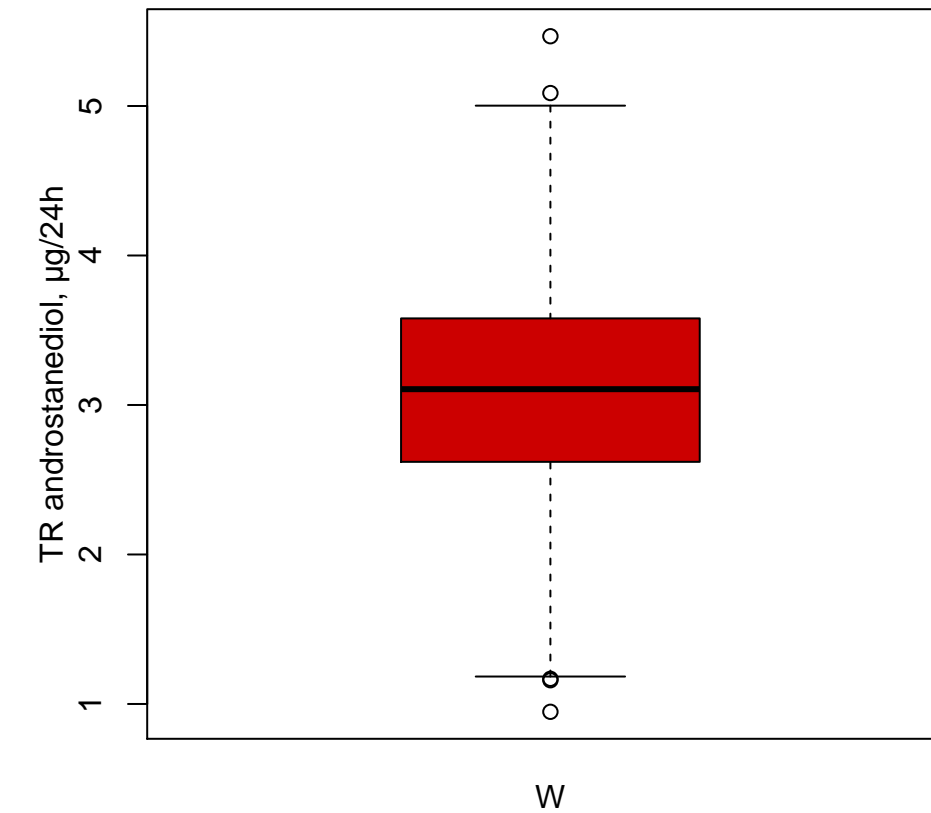

(e) D vs N: delta= -0.01 p = 0.179

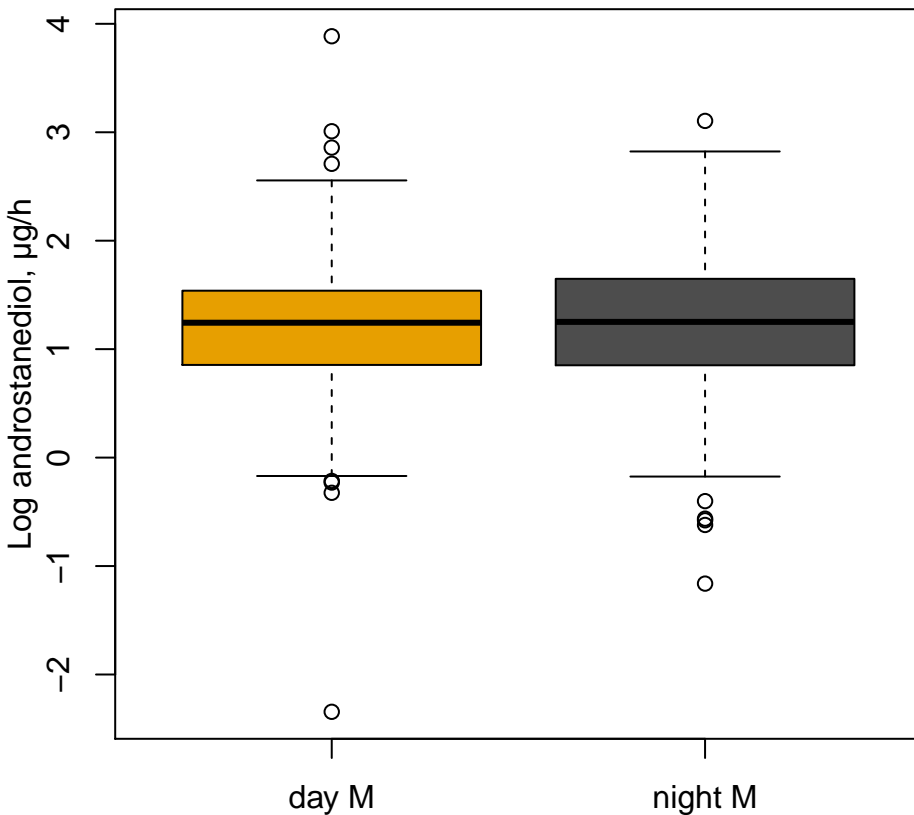

(f) D vs N: delta= 0.03 p = 0.01

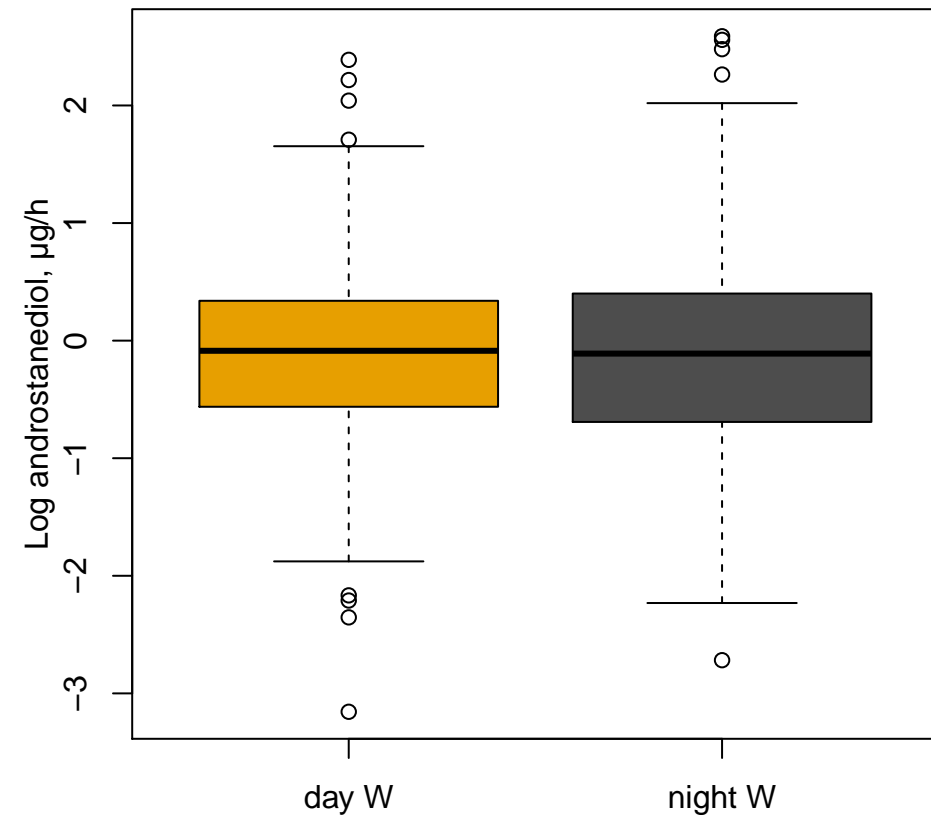

(g) M : rho= 0.669 n= 443

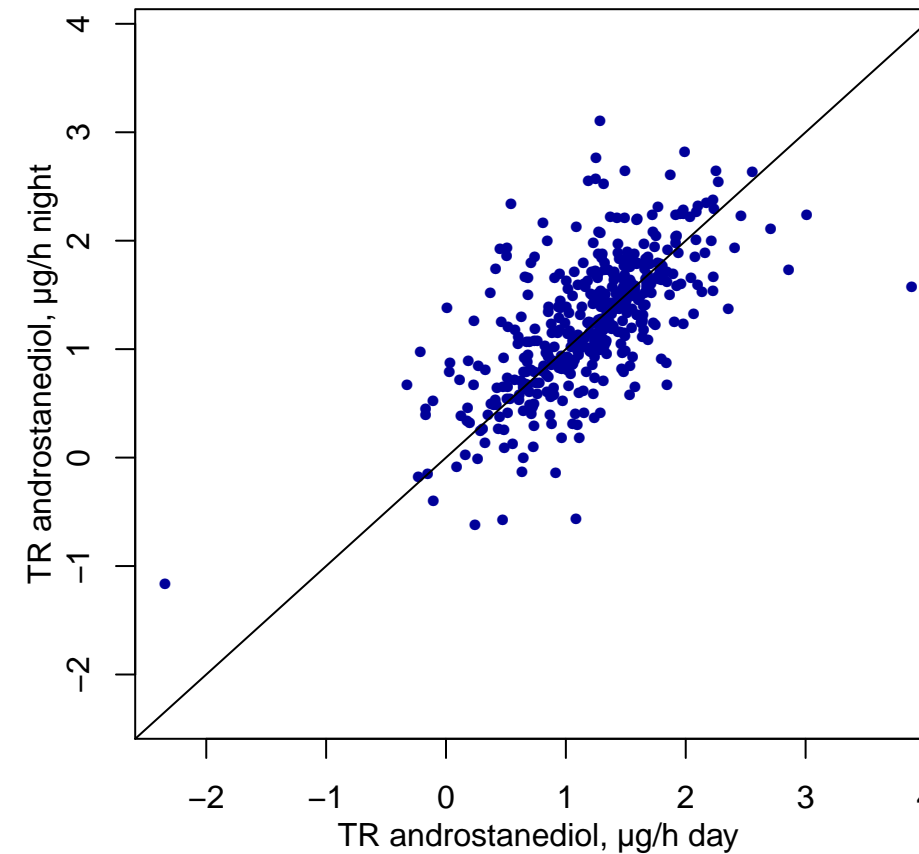

(h) W : rho= 0.753 n= 372

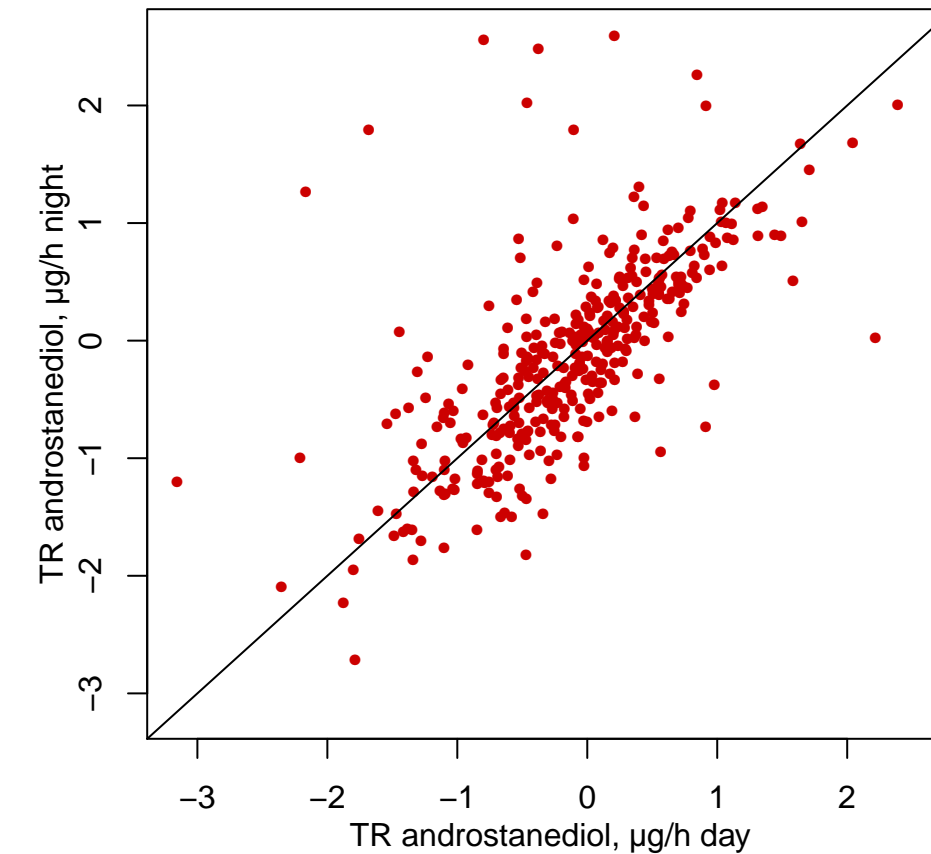

(a) M vs W:  $\delta = 1.4$   $p = 0$

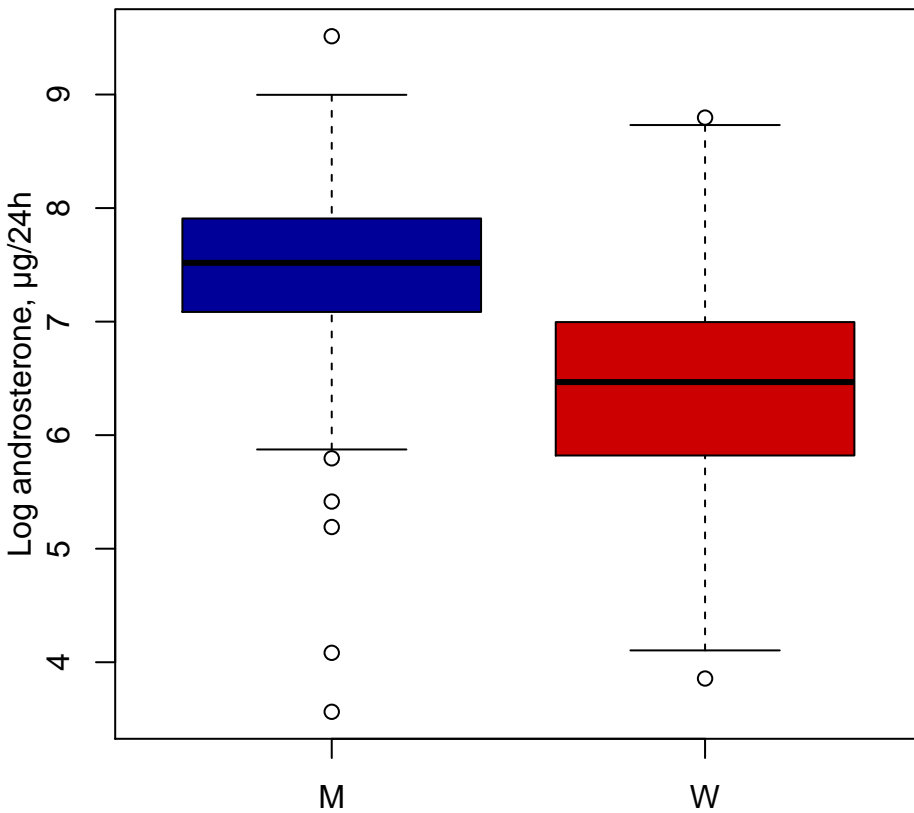

(b) M:  $p = 0$  W:  $p = 0$

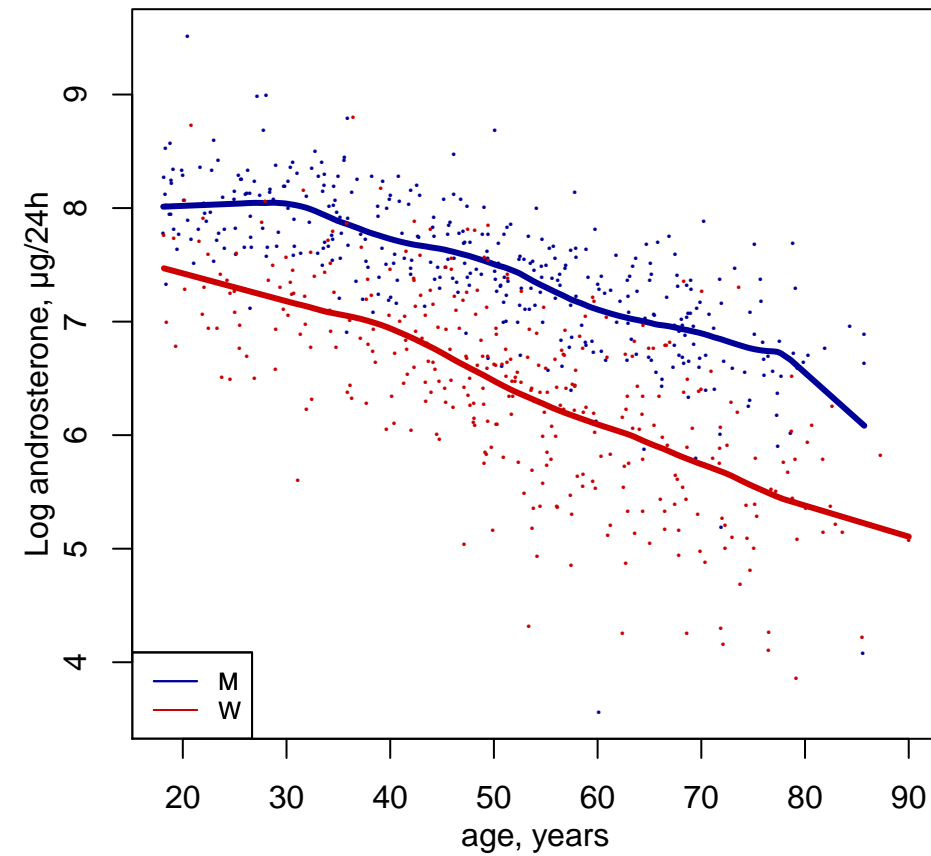

(c) TR= 0.2 nout= 3 sk= -0.06 ku= -0.08

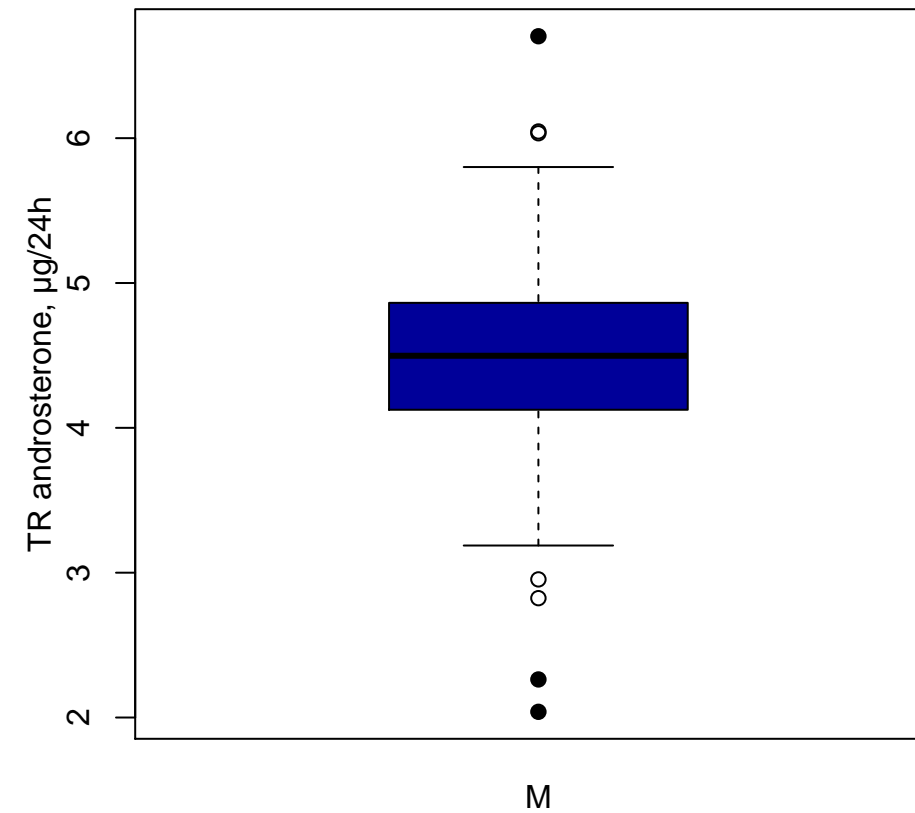

(d) TR= 0.1 nout= 0 sk= -0.06 ku= -0.08

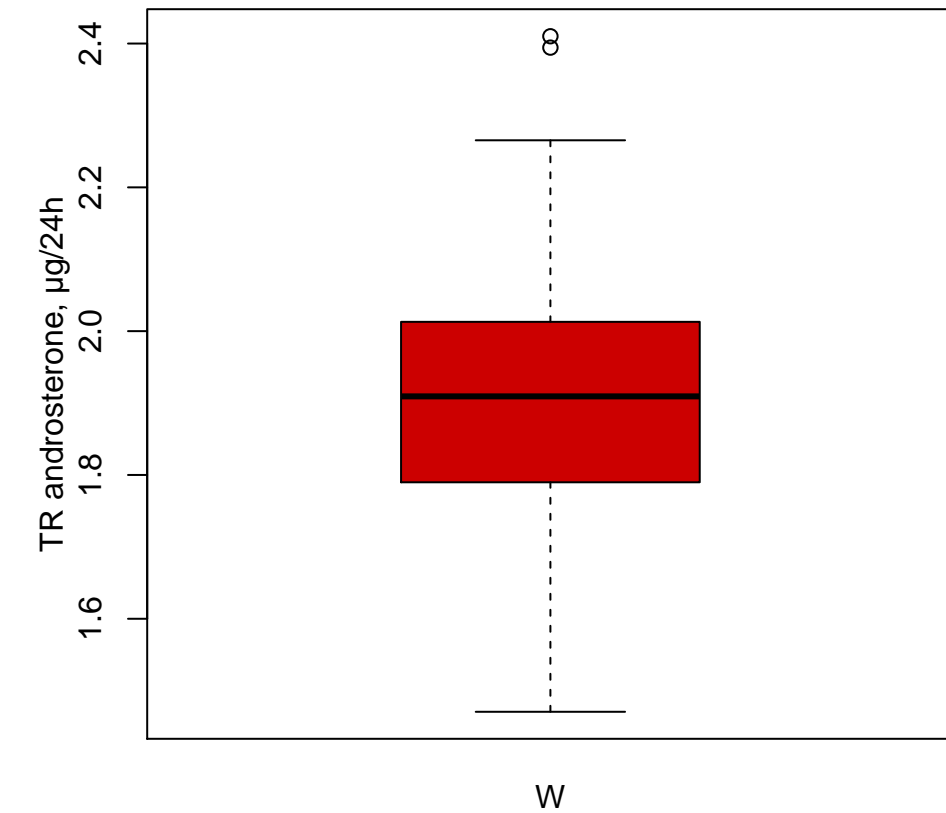

(e) D vs N:  $\delta = 0.07$   $p = 0.029$

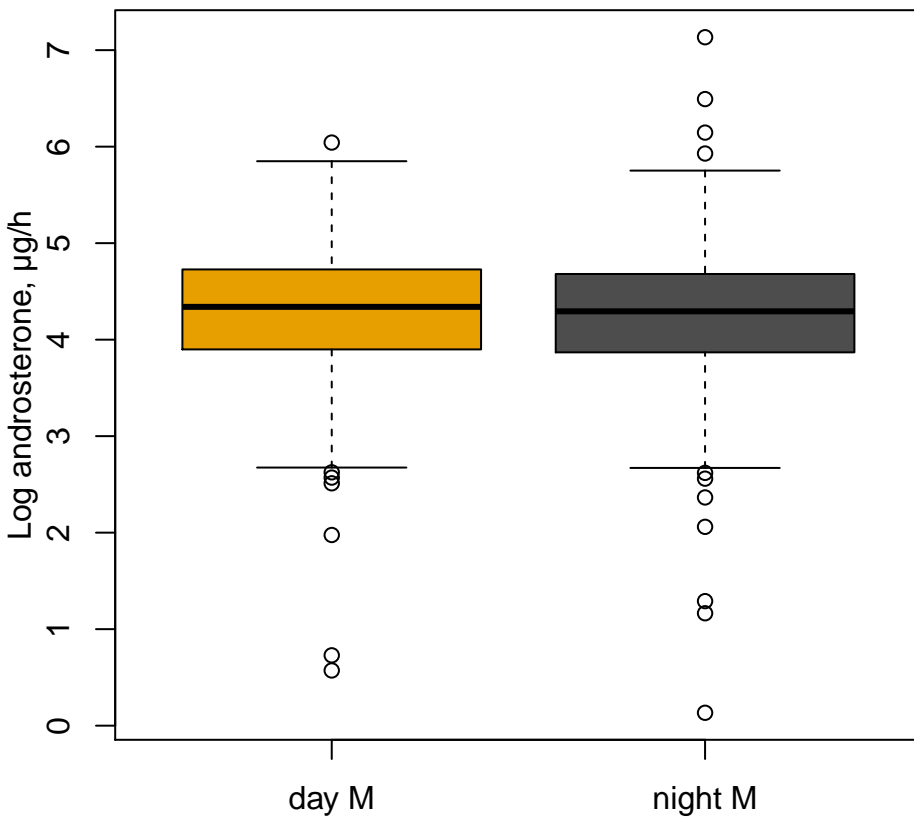

(f) D vs N:  $\delta = 0.11$   $p = 0$

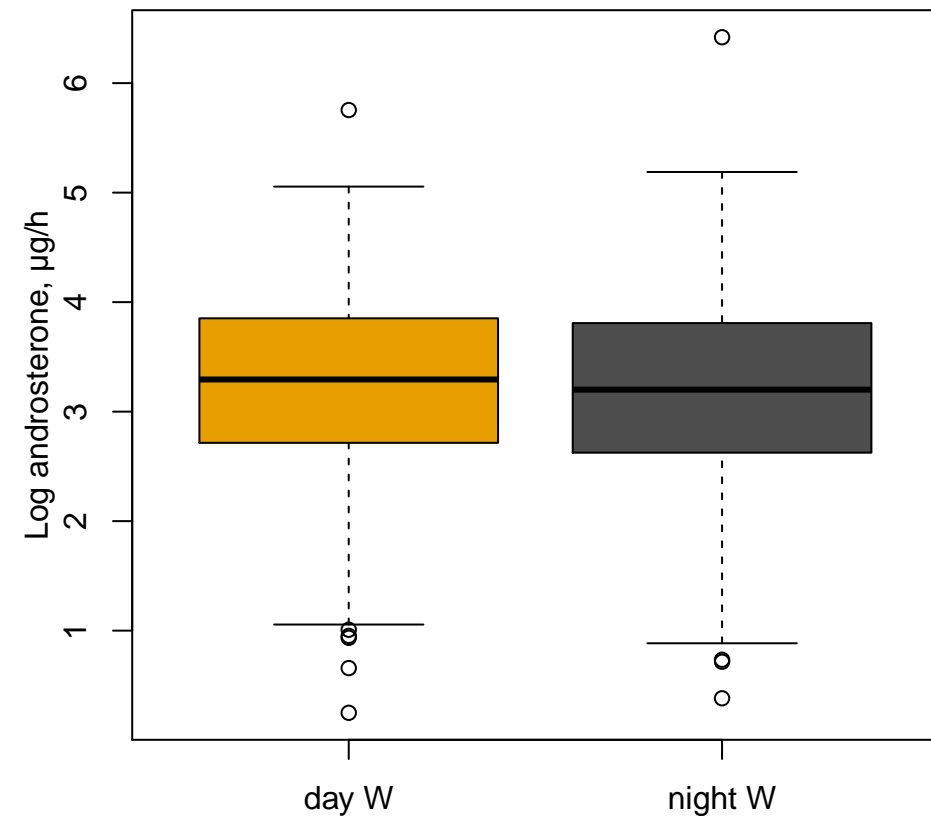

(g) M :  $\rho = 0.781$   $n = 379$

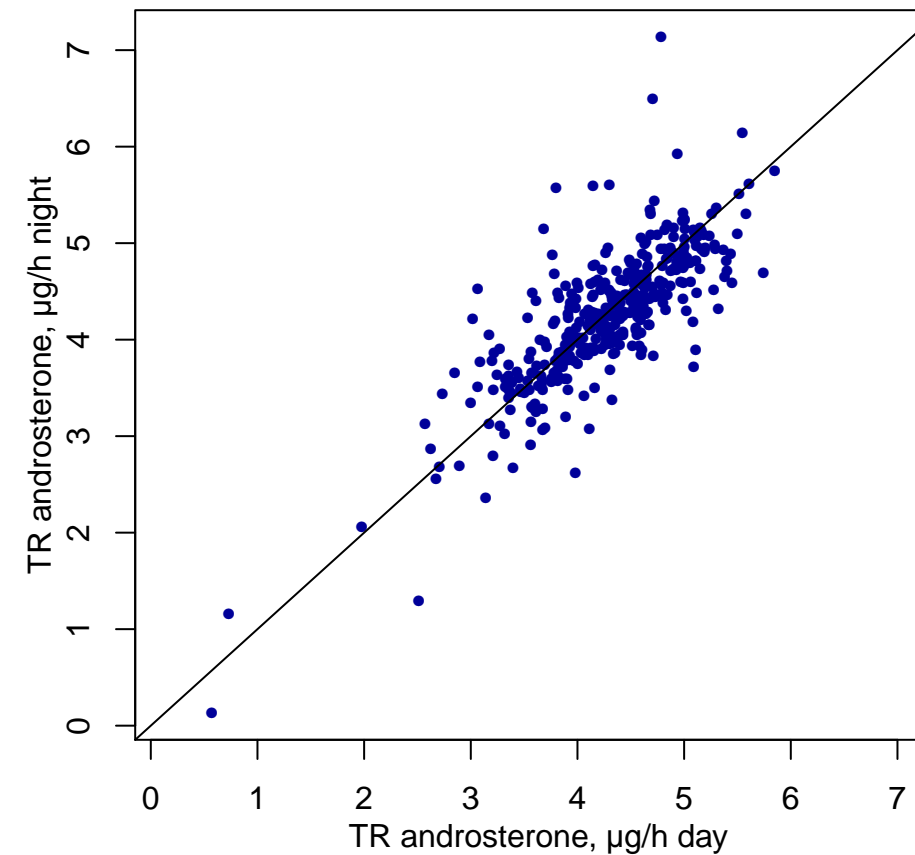

(h) W :  $\rho = 0.896$   $n = 349$

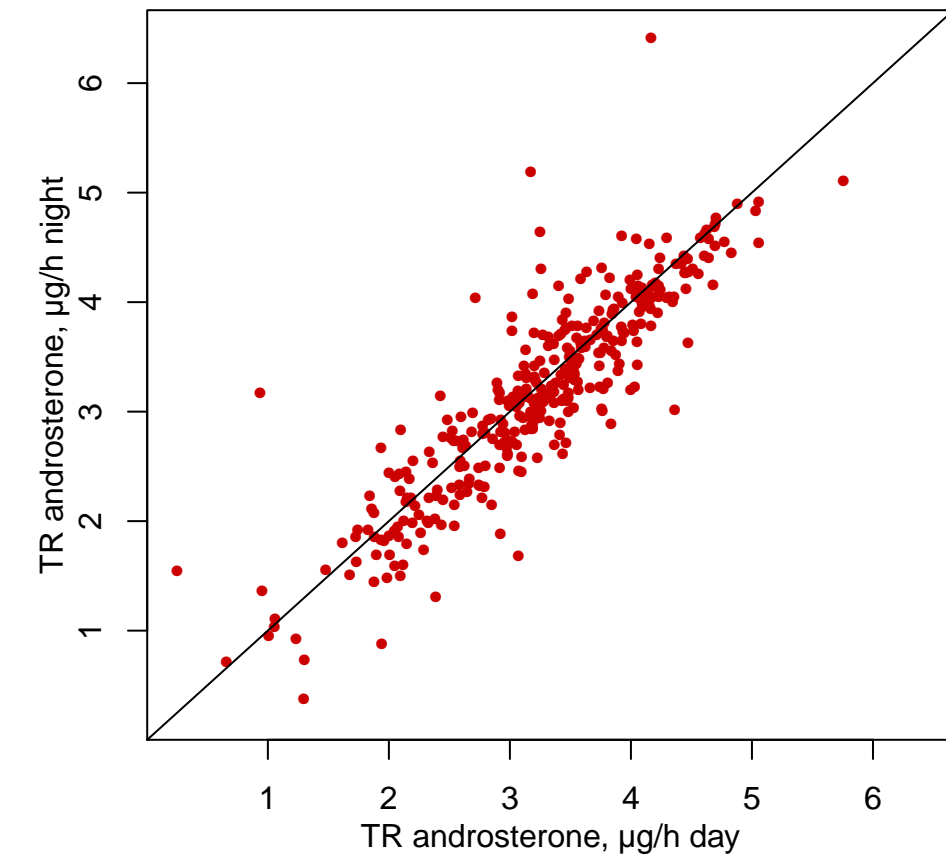

**(a) M vs W: delta= 1.48 p = 0**

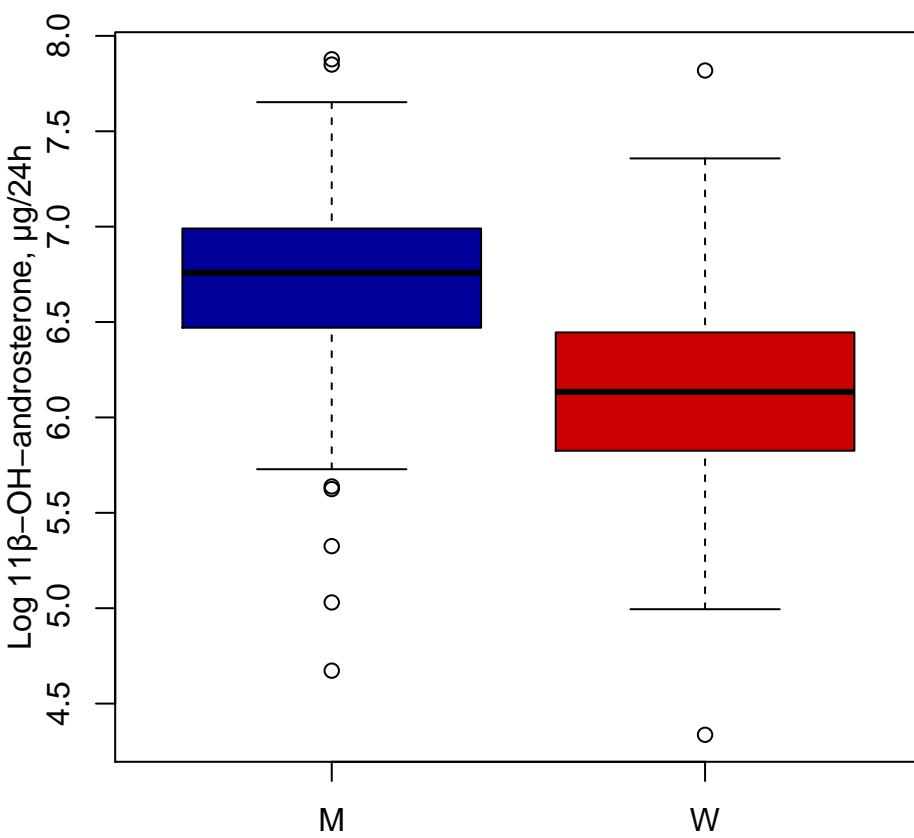

**(b) M: p = 0.008 W: p = 0.7**

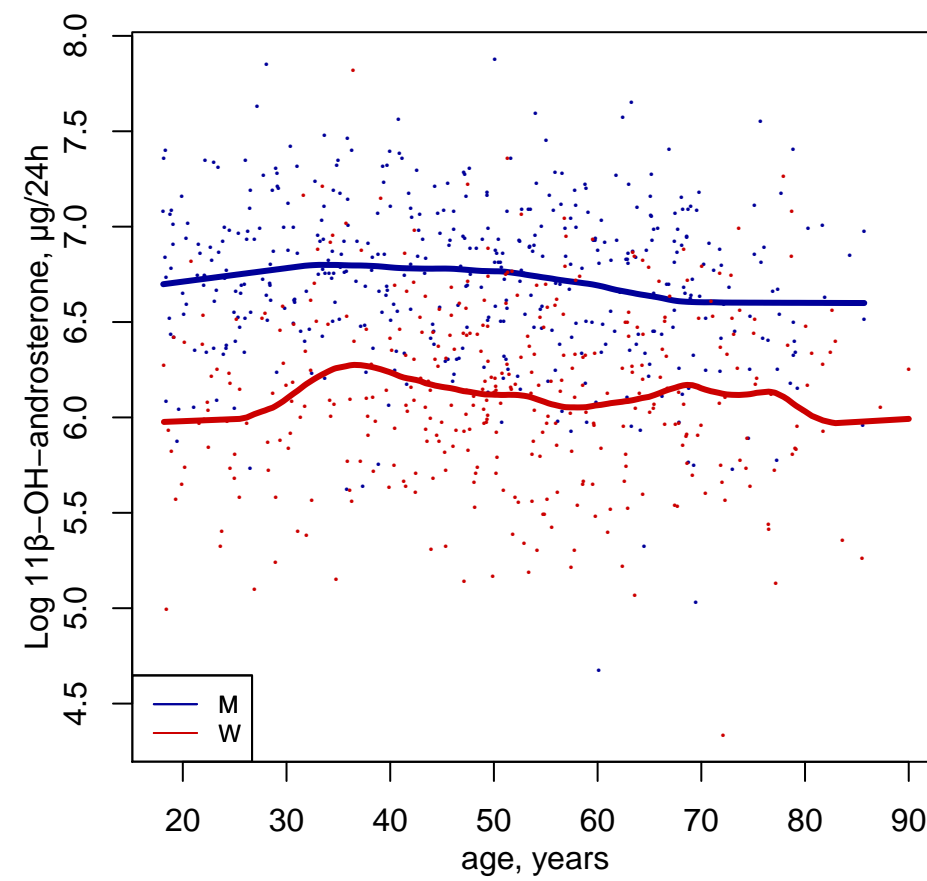

**(c) TR= 0.3 nout= 1 sk= 0.04 ku= 0.22**

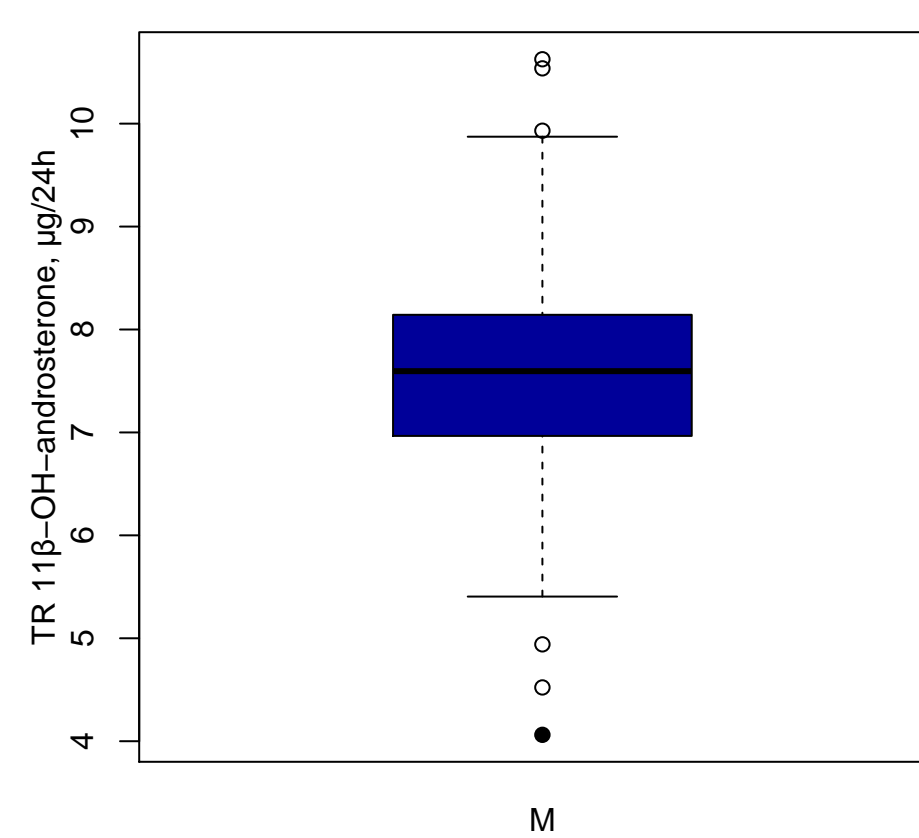

**(d) TR= -0.1 nout= 1 sk= -0.02 ku= 0.22**

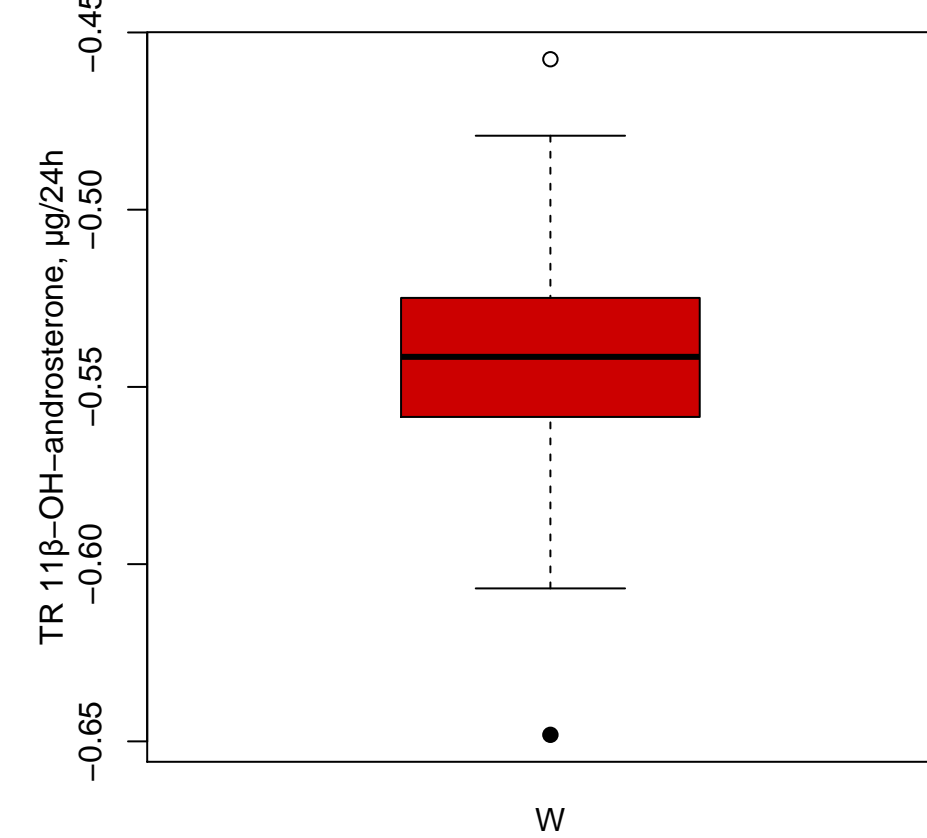

**(e) D vs N: delta= 0.73 p = 0**

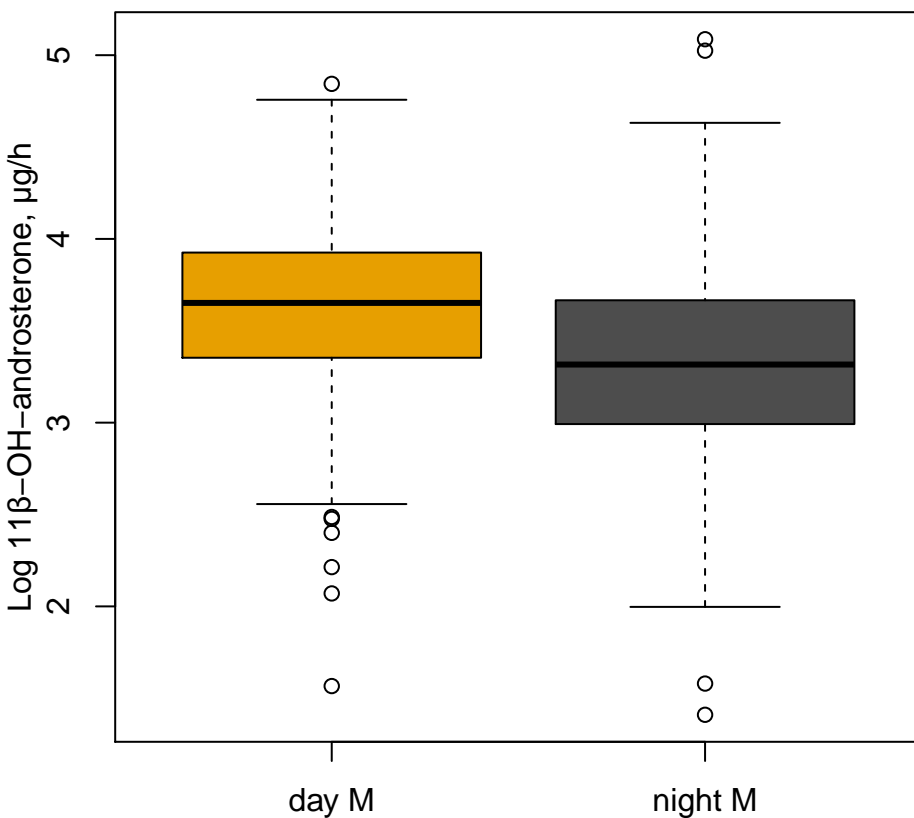

**(f) D vs N: delta= 0.63 p = 0**

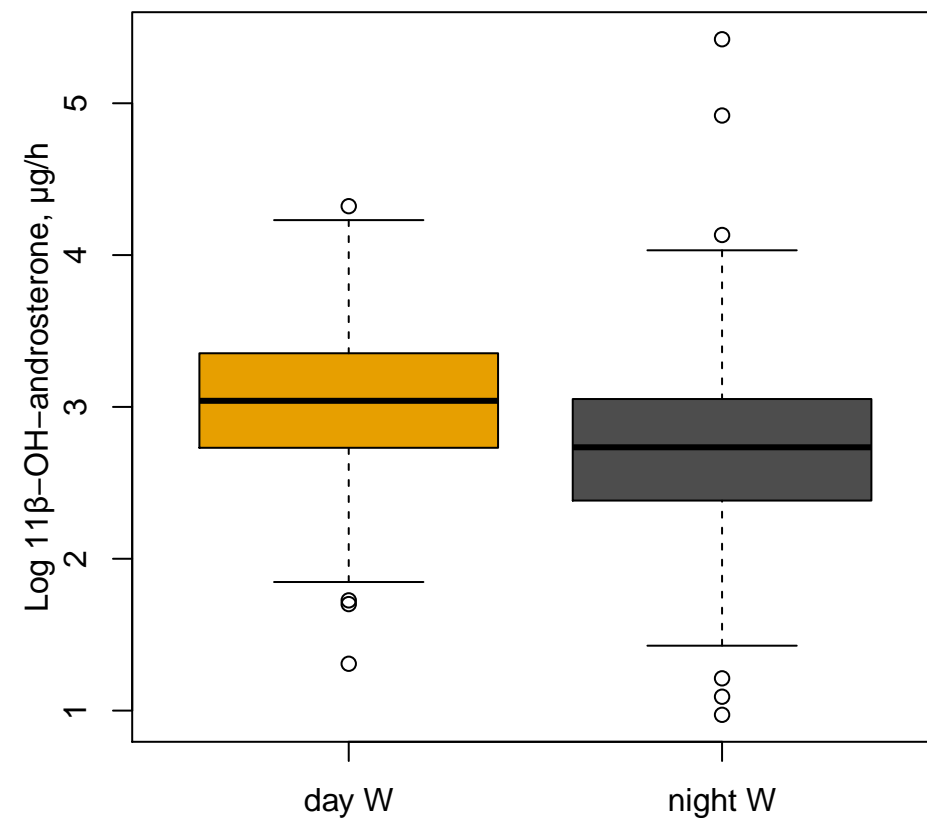

**(g) M : rho= 0.54 n= 445**

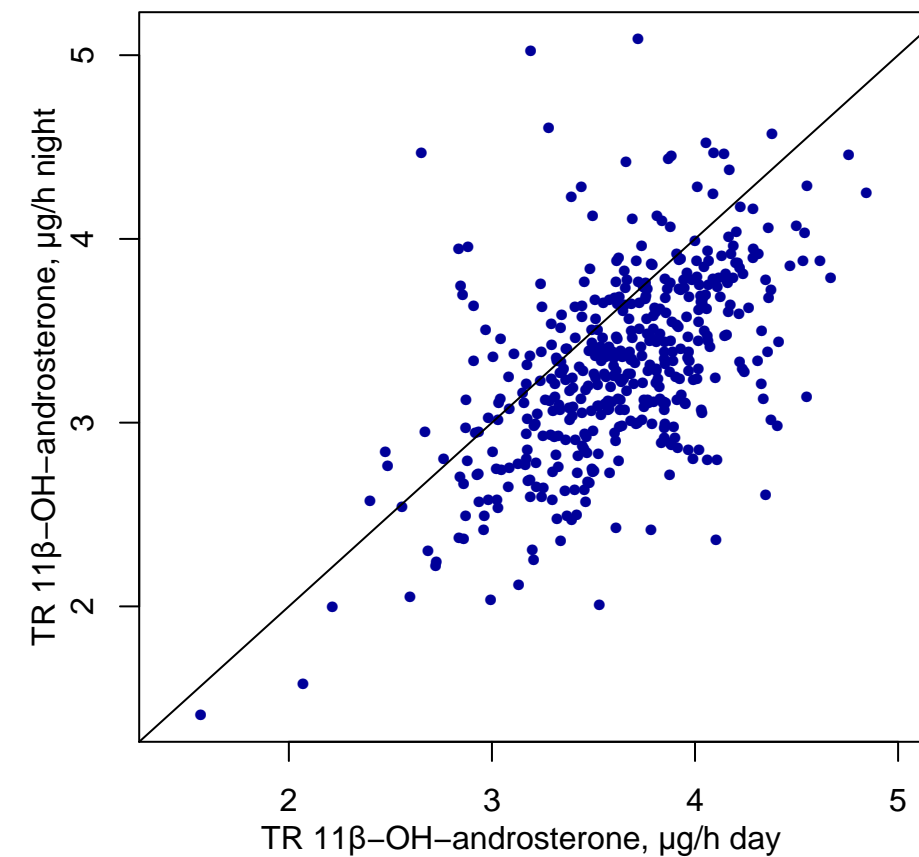

**(h) W : rho= 0.664 n= 376**

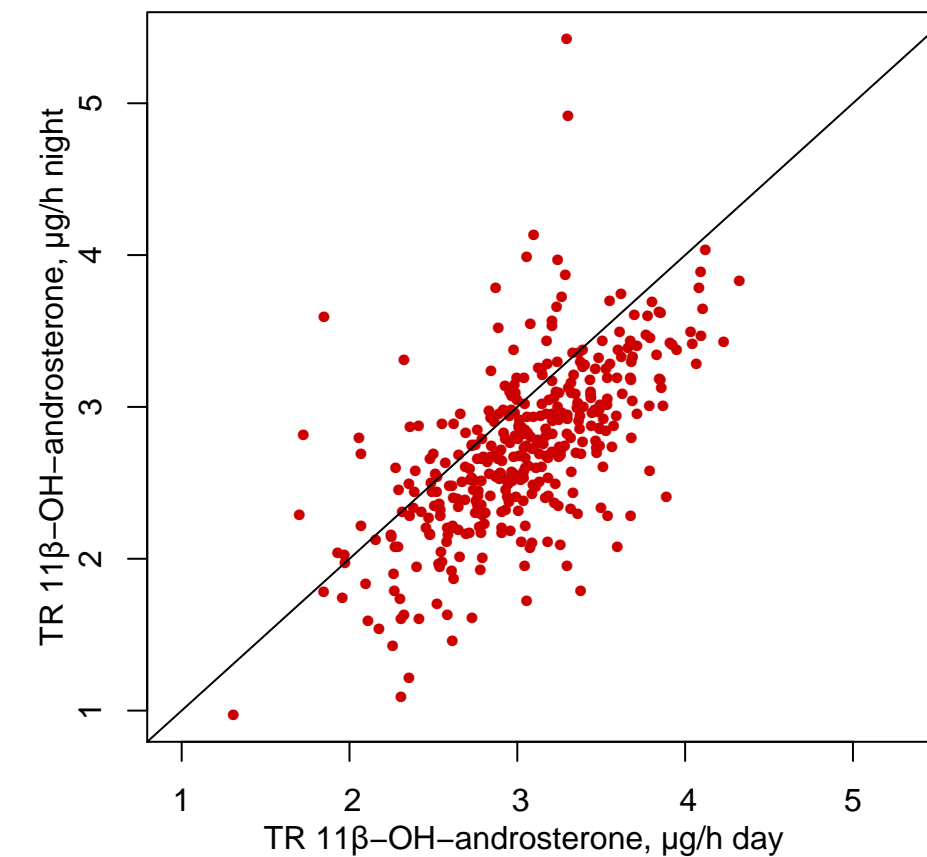

**(a) M vs W: delta= 0.8 p = 0**

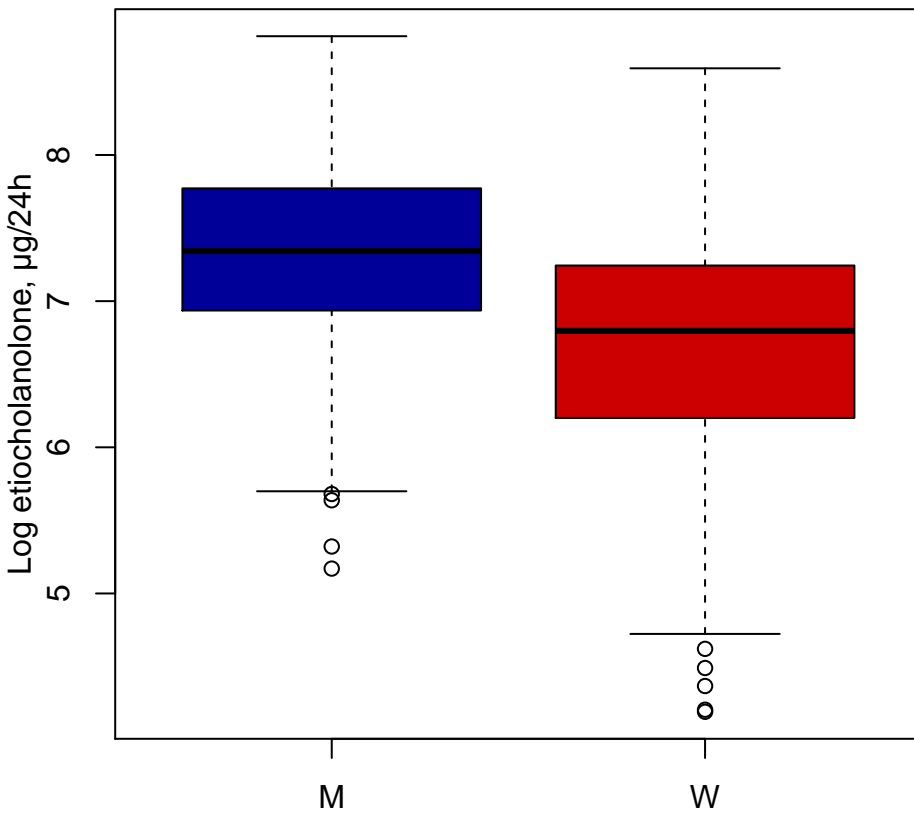

**(b) M: p = 0 W: p = 0**

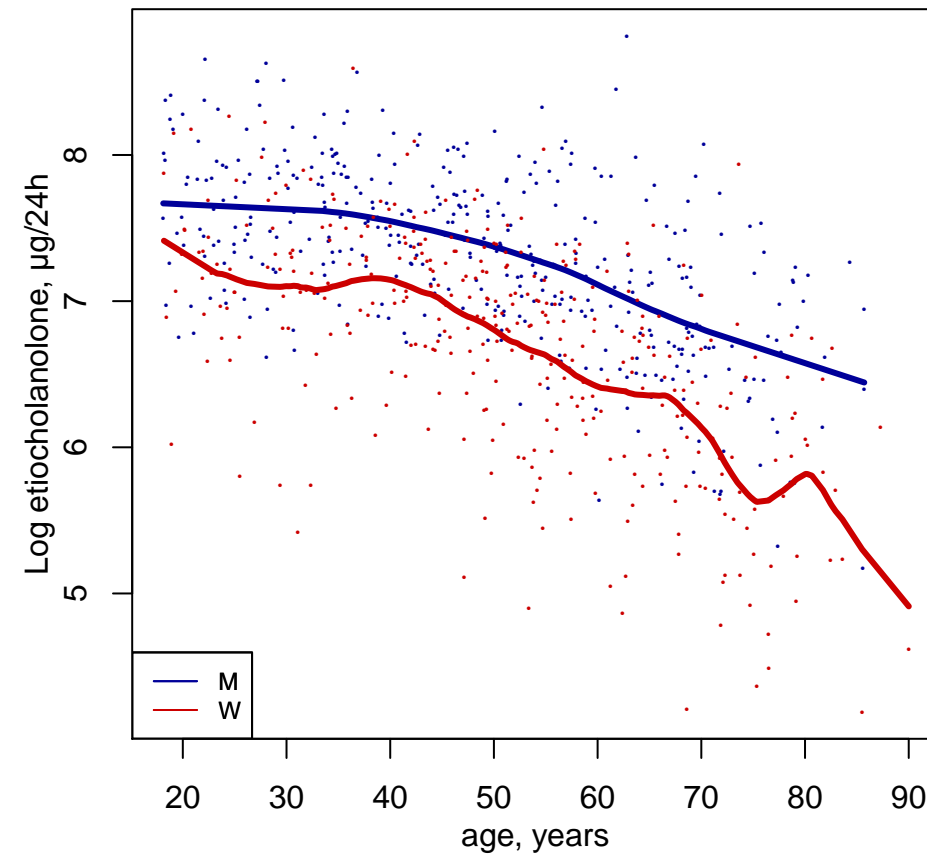

**(c) TR= 0.3 nout= 0 sk= 0.08 ku= -0.1**

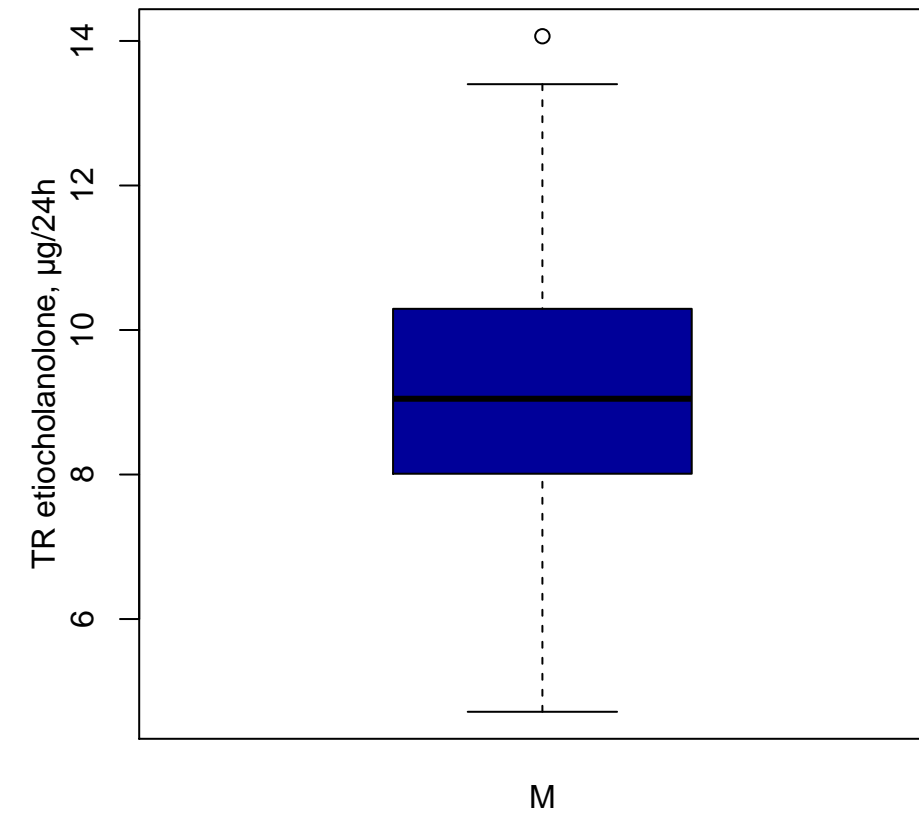

**(d) TR= 0.3 nout= 0 sk= 0 ku= -0.1**

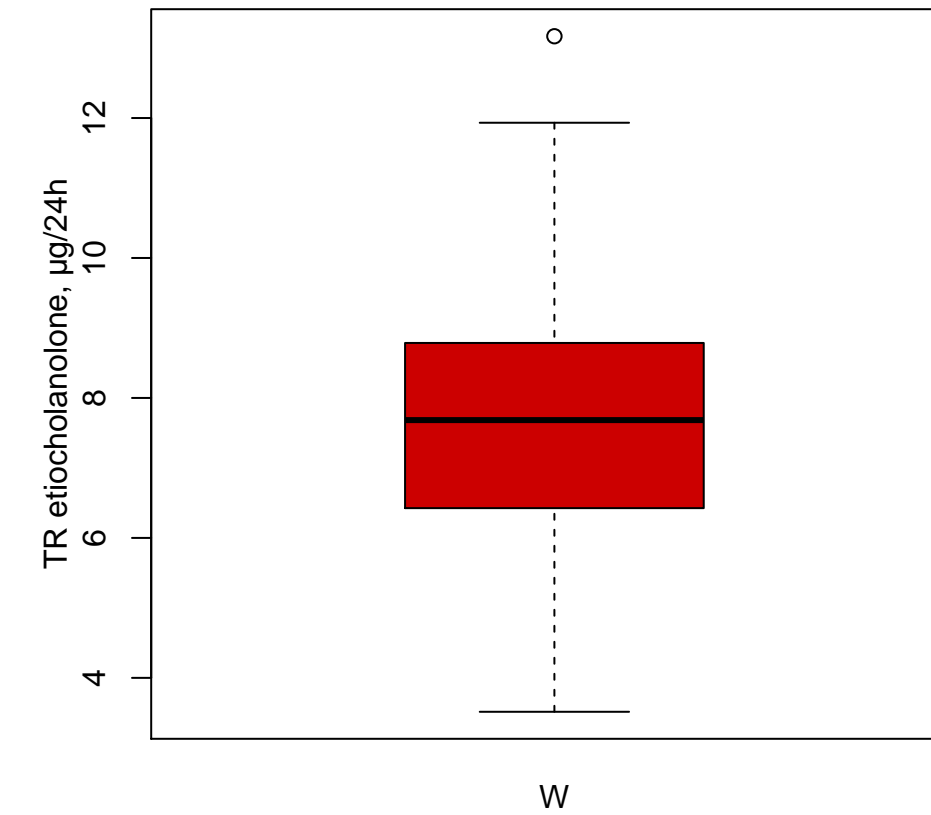

**(e) D vs N: delta= 0.05 p = 0.832**

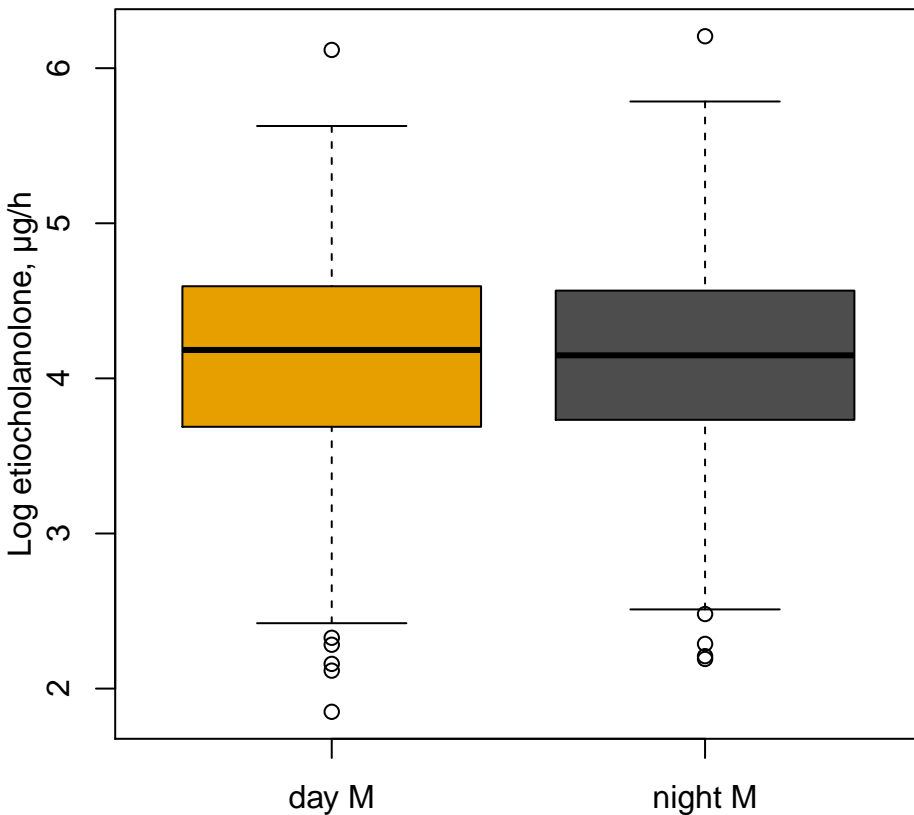

**(f) D vs N: delta= 0.02 p = 0.042**

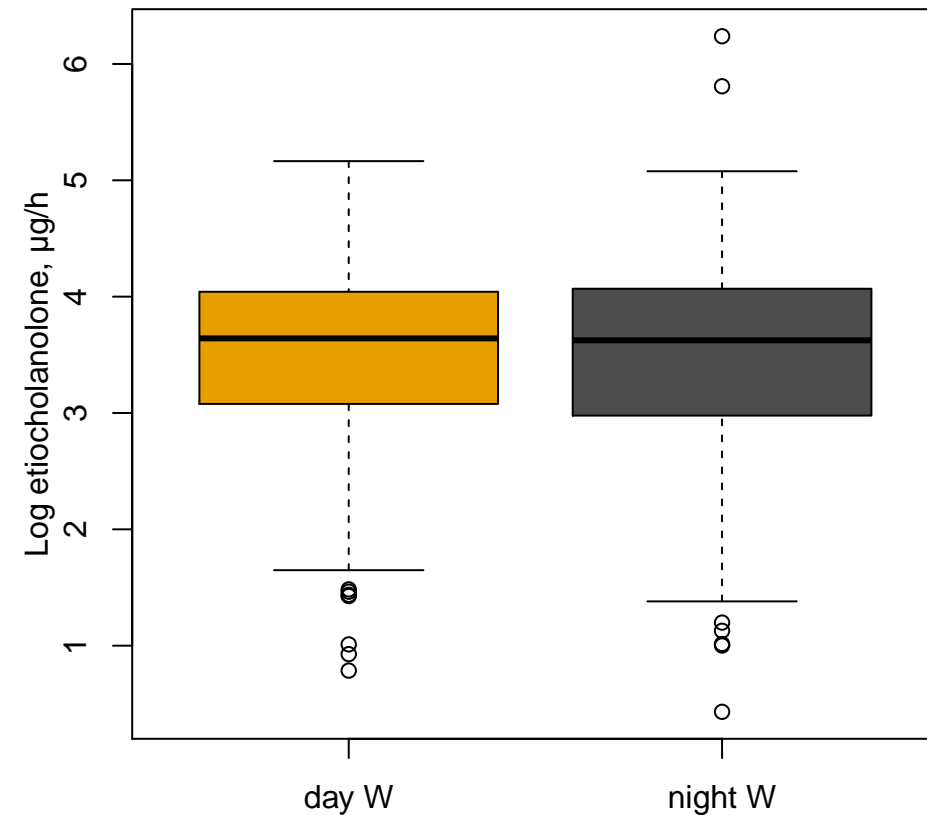

**(g) M : rho= 0.774 n= 388**

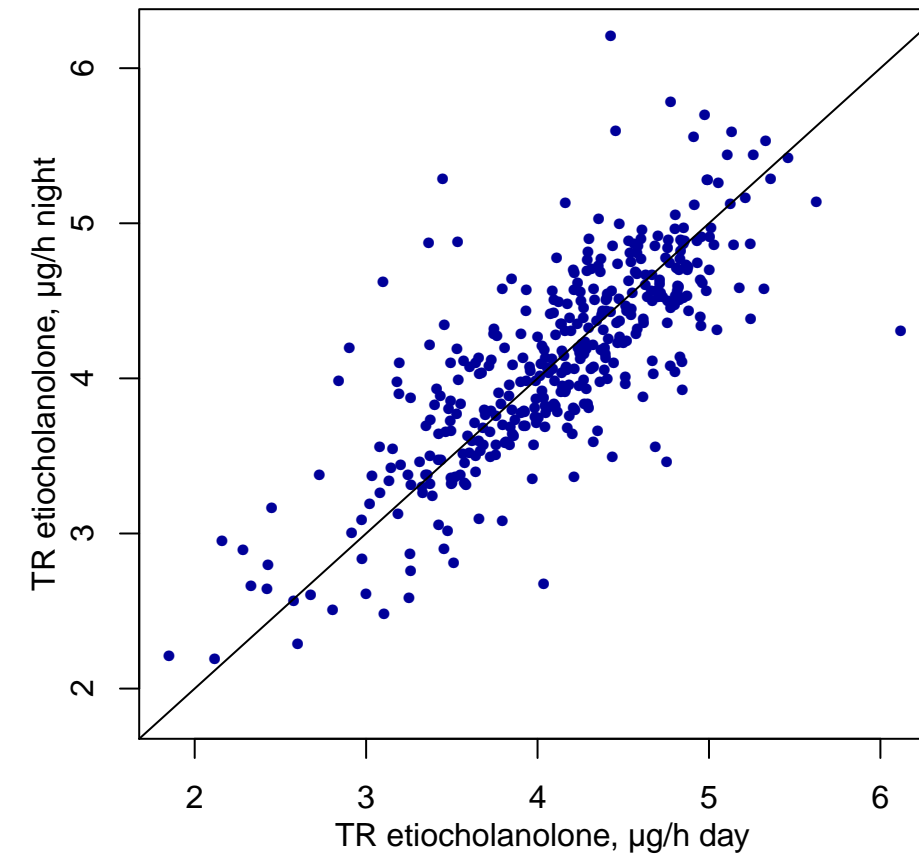

**(h) W : rho= 0.869 n= 351**

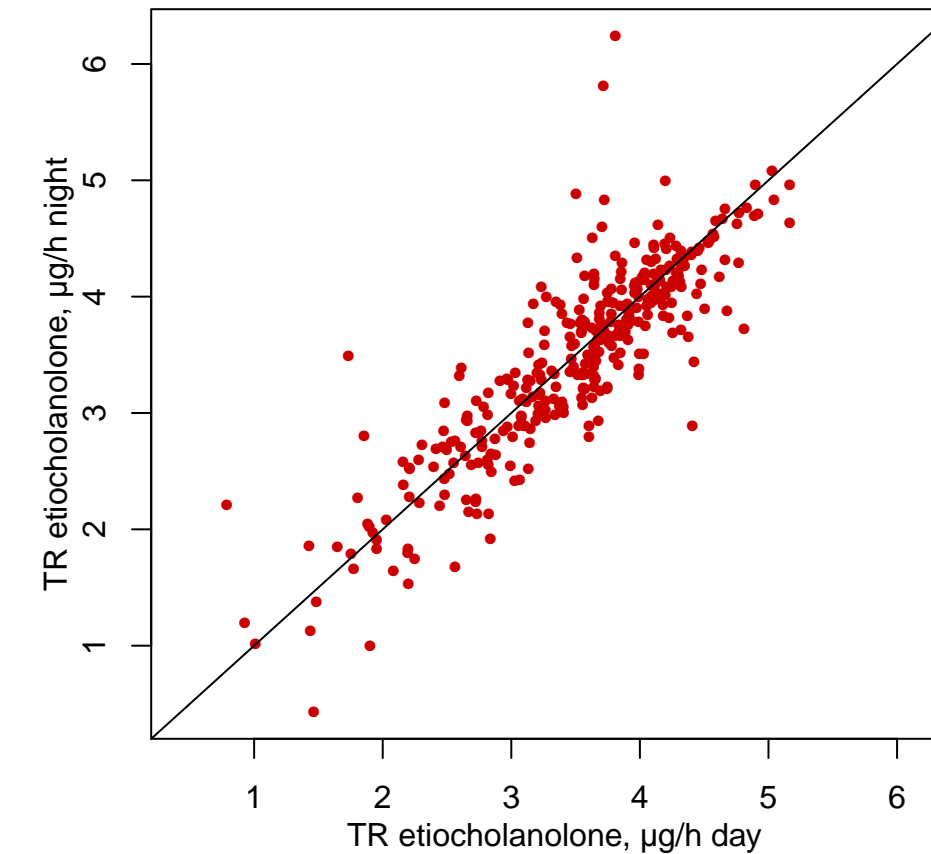



(a) M vs W: delta= 0.3 p = 0.002

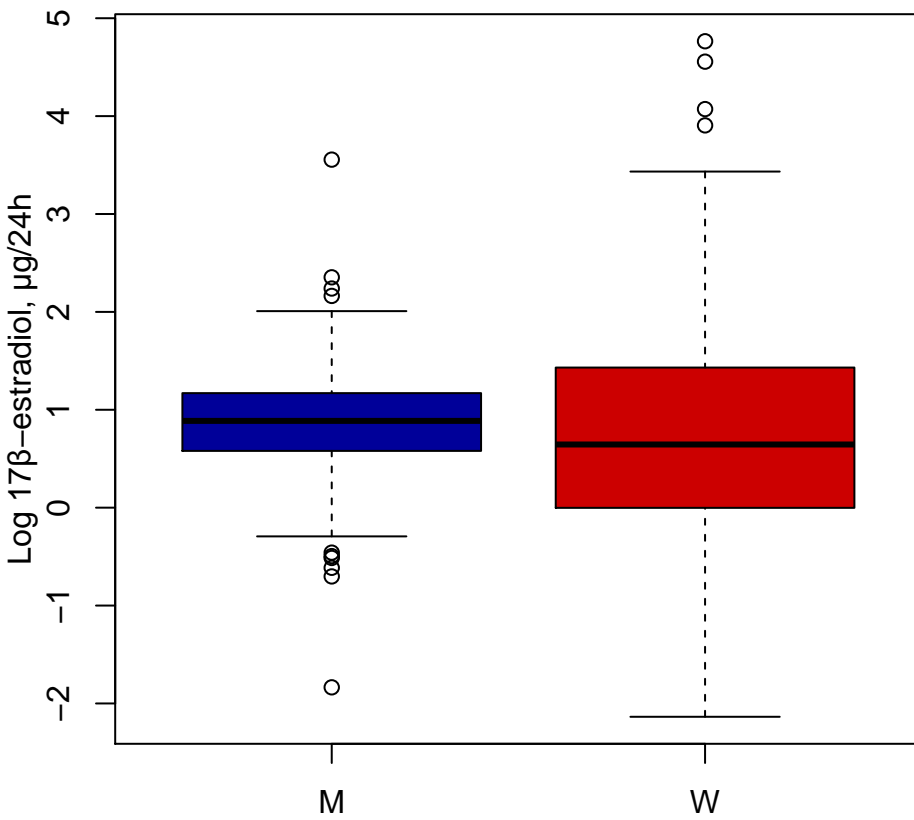

(b) M: p = 0.033 W: p = 0

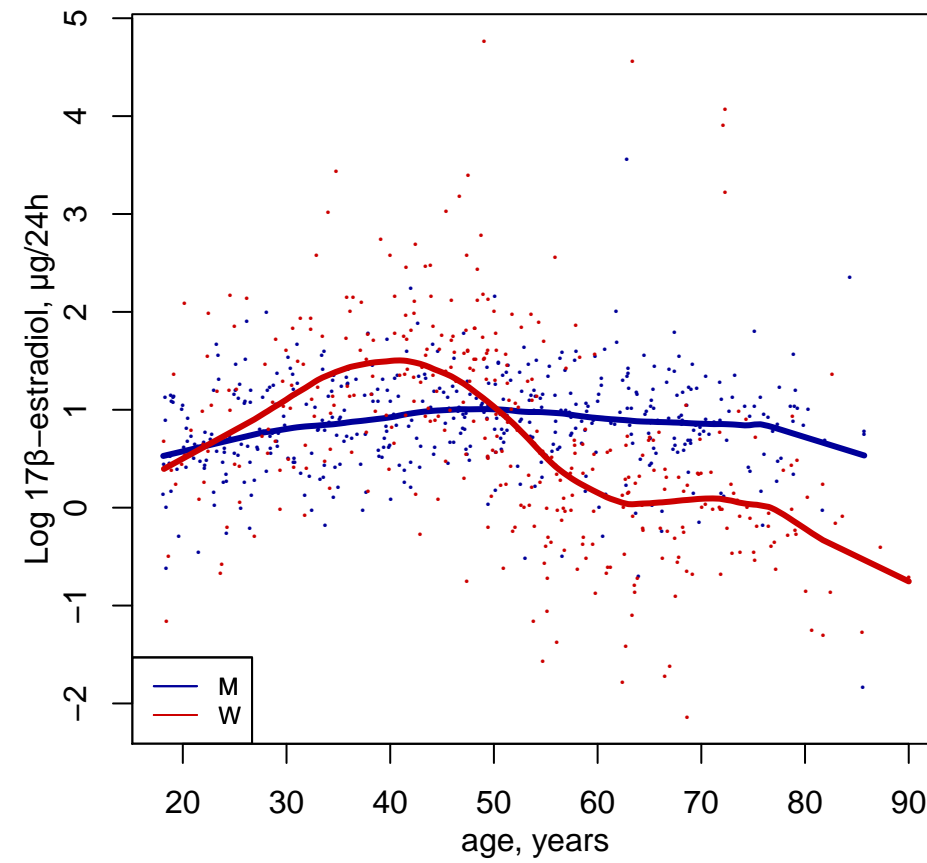

(c) TR= 0.1 nout= 2 sk= -0.06 ku= 0.47

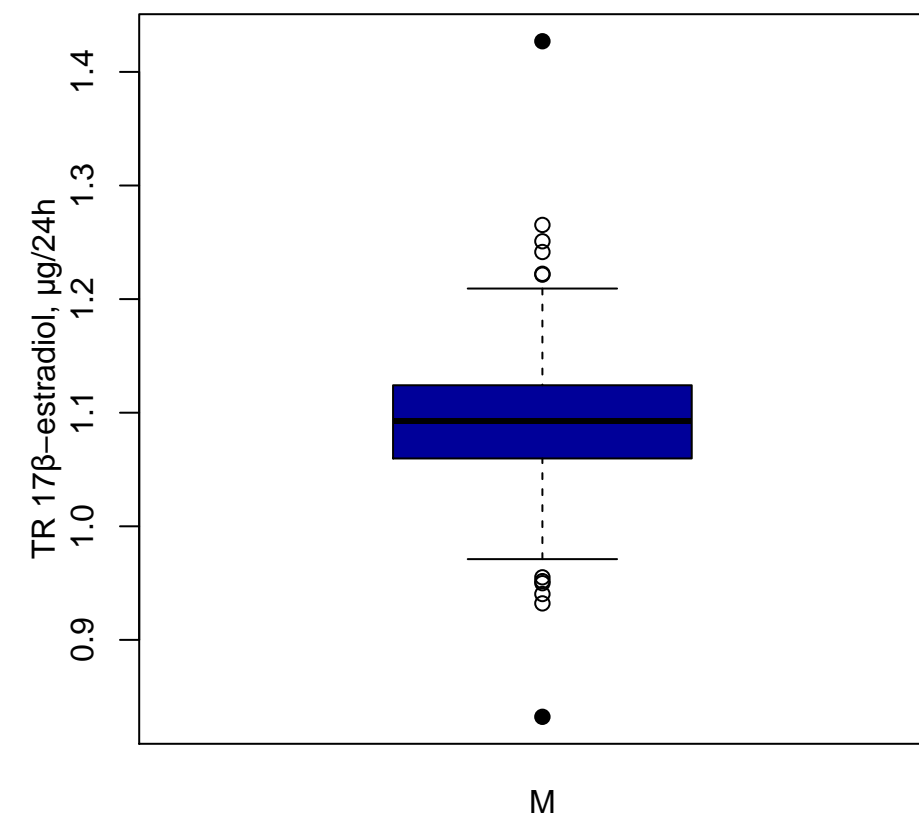

(d) TR= -0.1 nout= 0 sk= 0.03 ku= 0.47

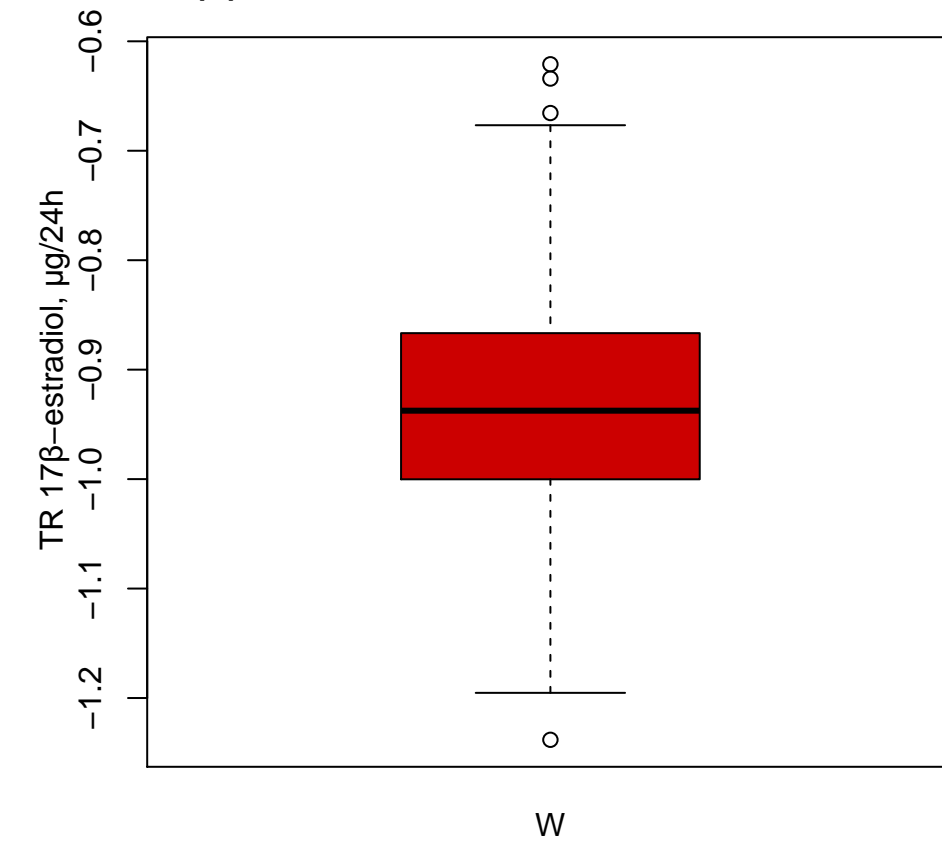

(e) D vs N: delta= -0.12 p = 0.006

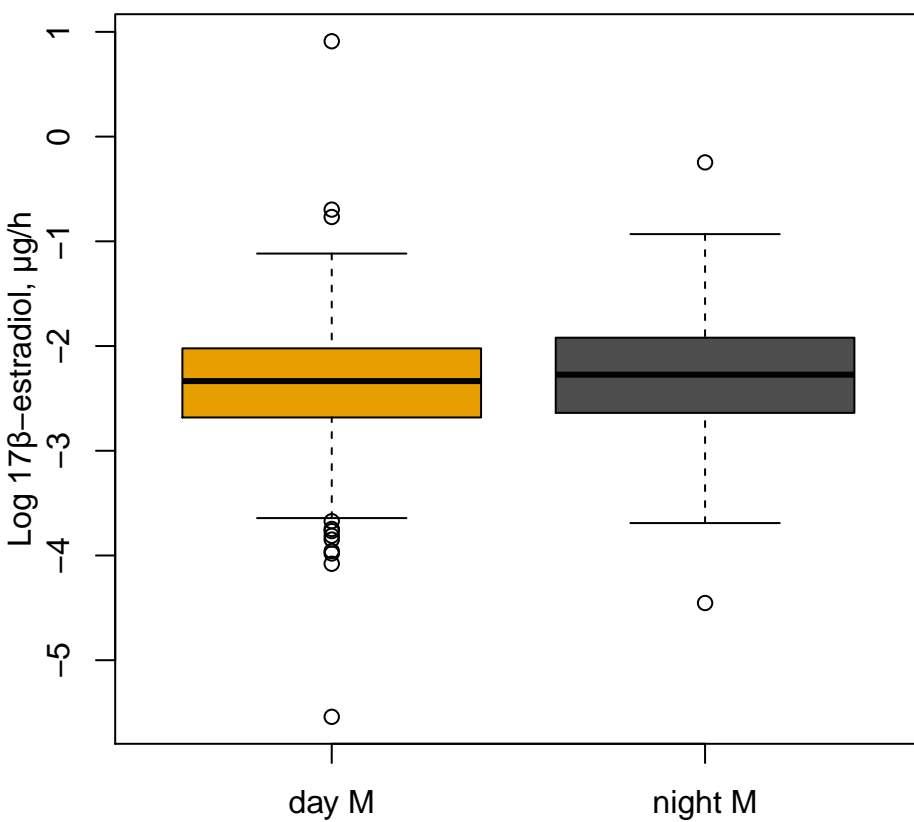

(f) D vs N: delta= 0.02 p = 0.778

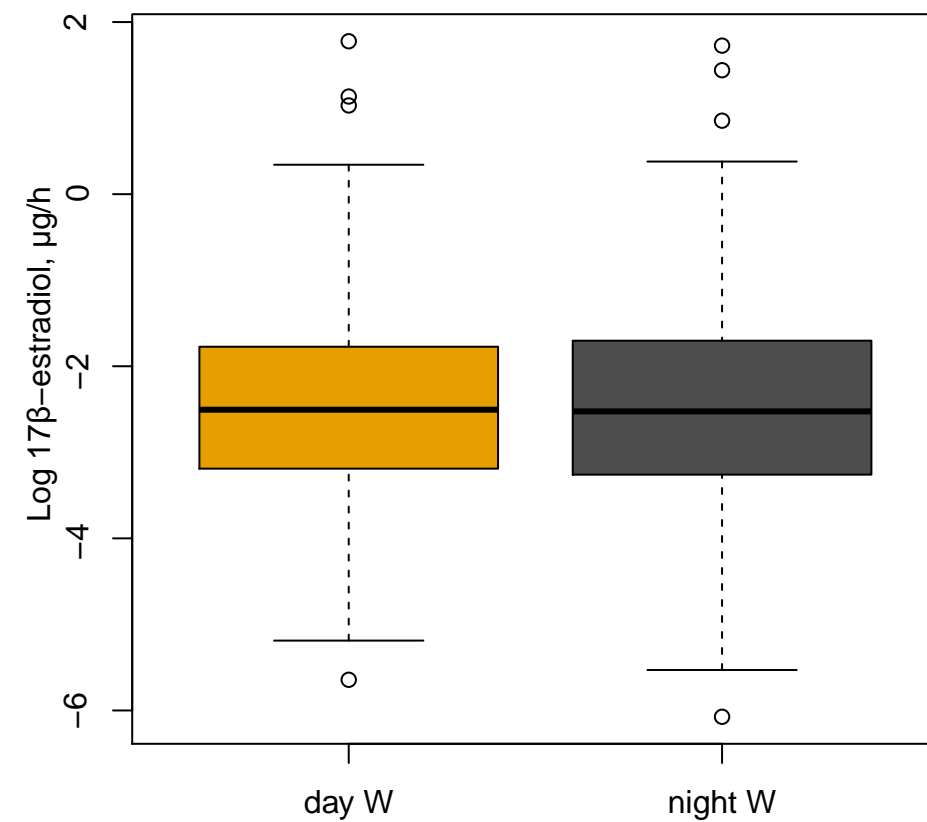

(g) M : rho= 0.534 n= 455

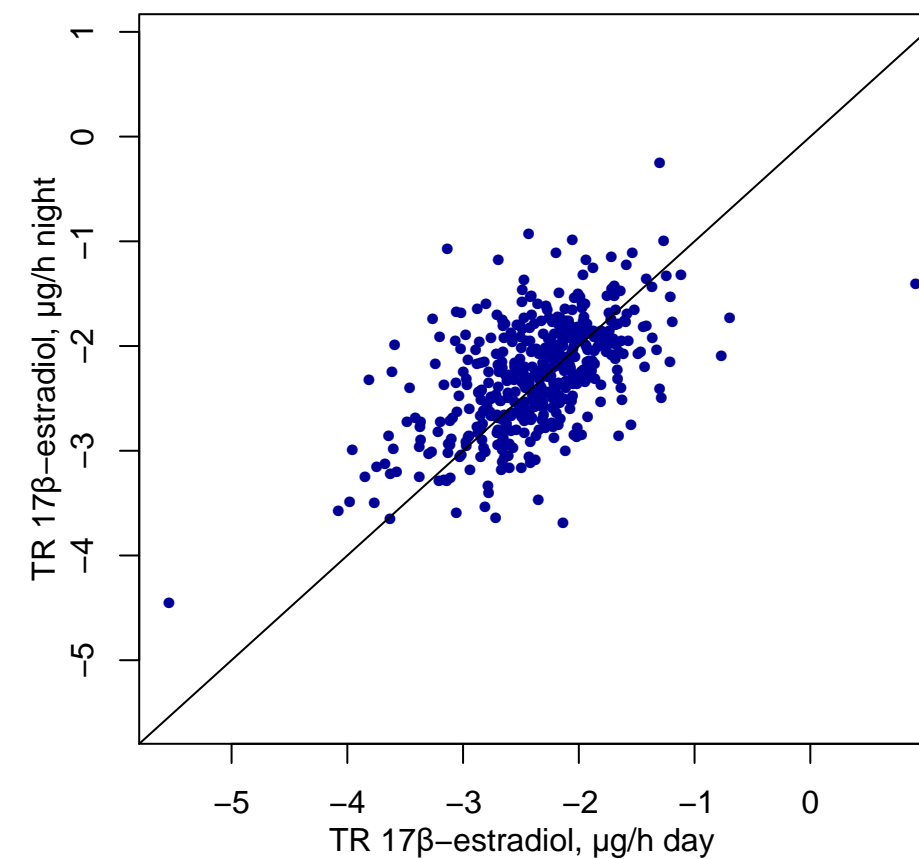

(h) W : rho= 0.86 n= 377

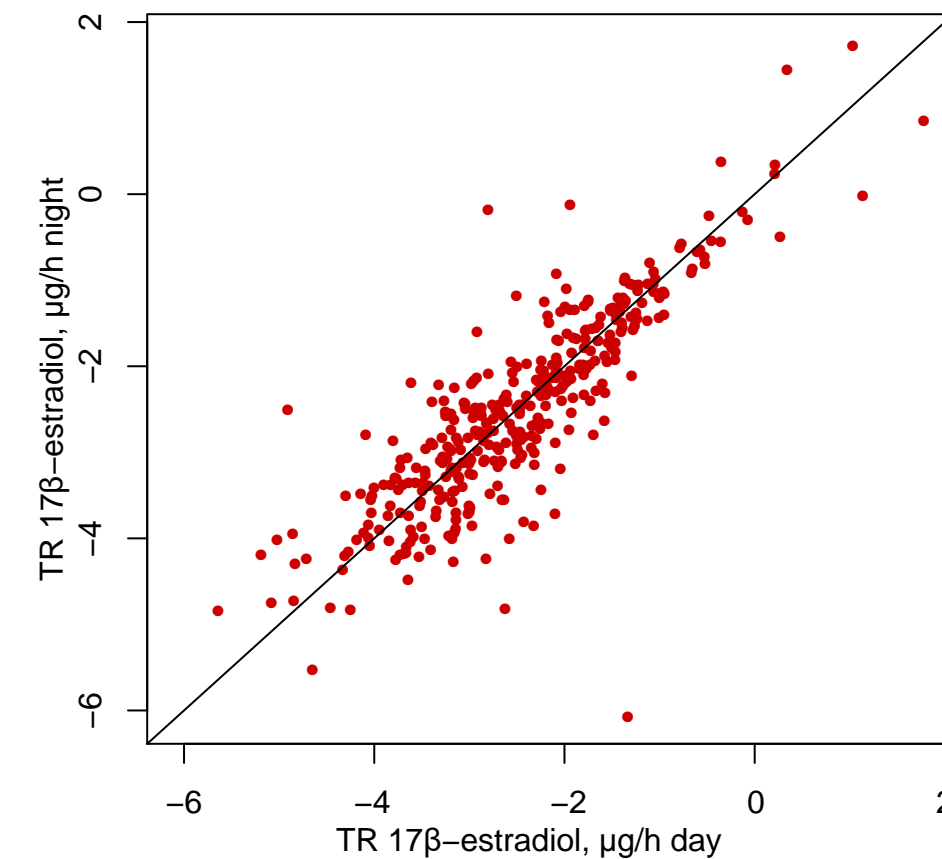

(a) M vs W:  $\delta = 0.25$   $p = 0.001$

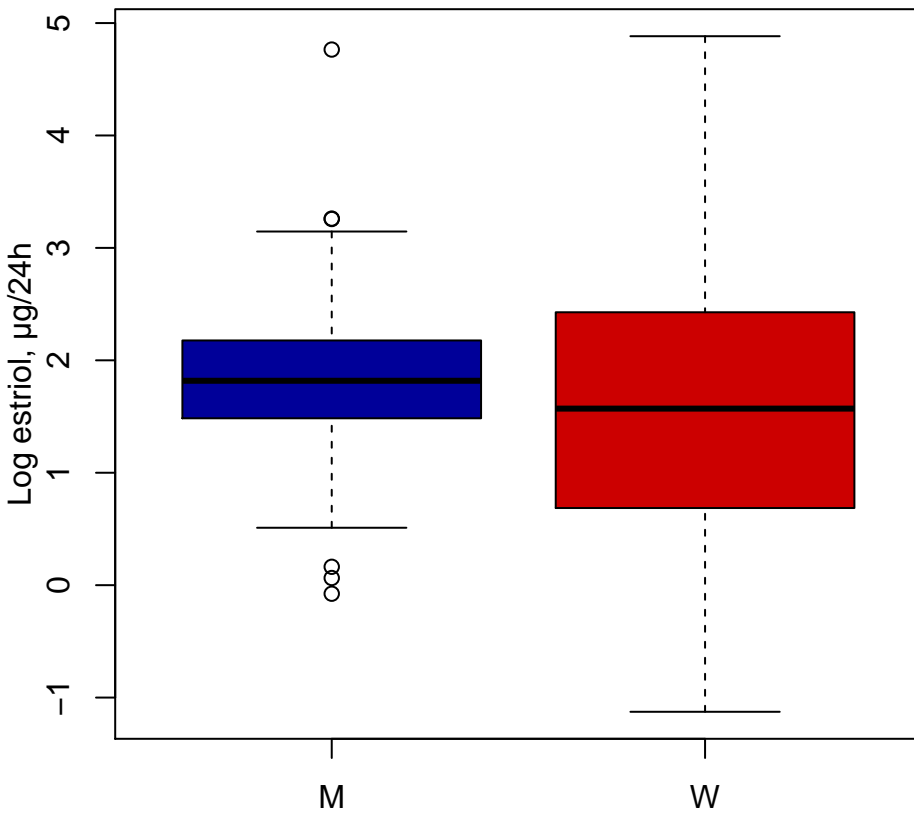

(b) M:  $p = 0.001$  W:  $p = 0$

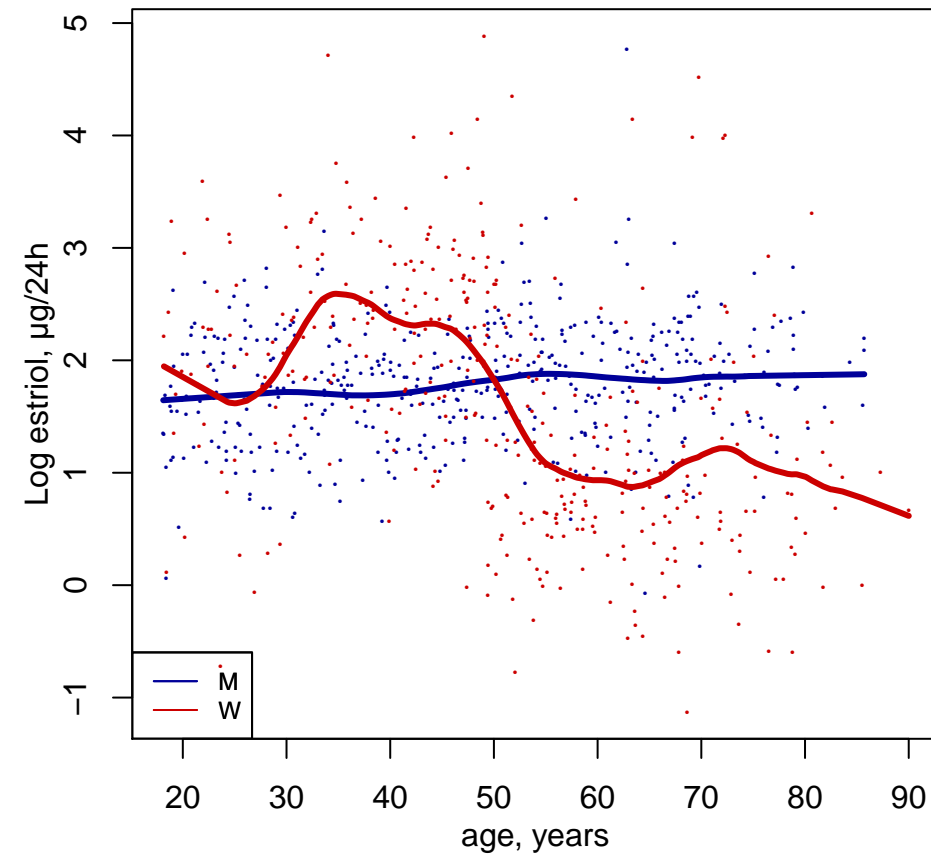

(c)  $\text{TR} = 0.1$   $\text{nout} = 1$   $\text{sk} = -0.04$   $\text{ku} = 0.35$

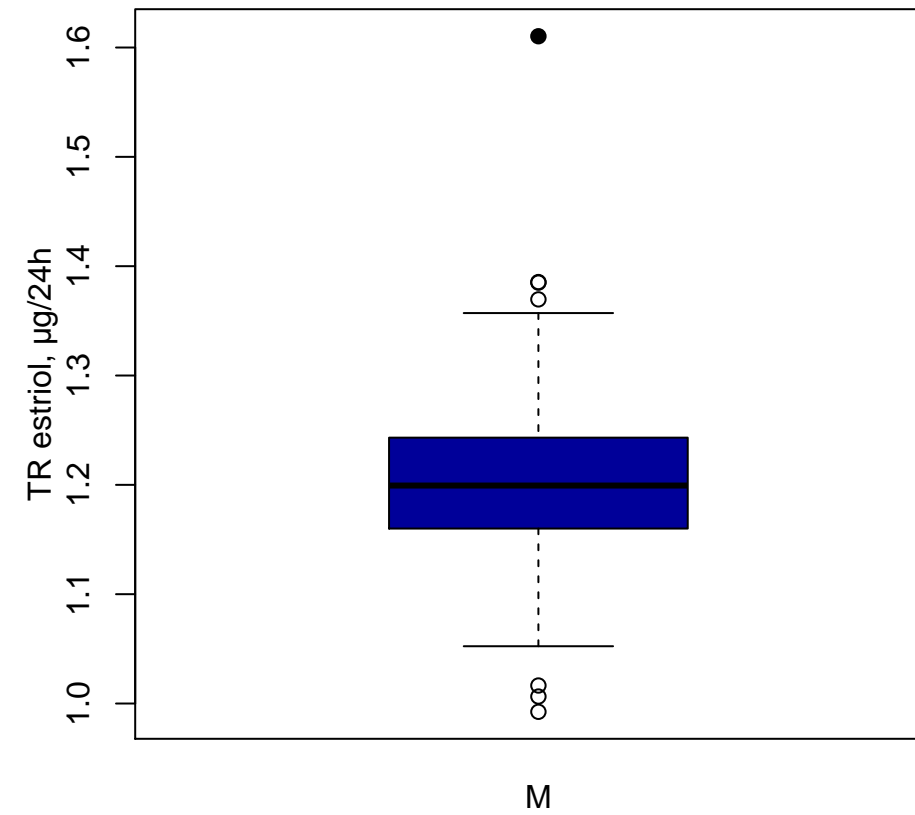

(d)  $\text{TR} = -0.1$   $\text{nout} = 0$   $\text{sk} = 0$   $\text{ku} = 0.35$

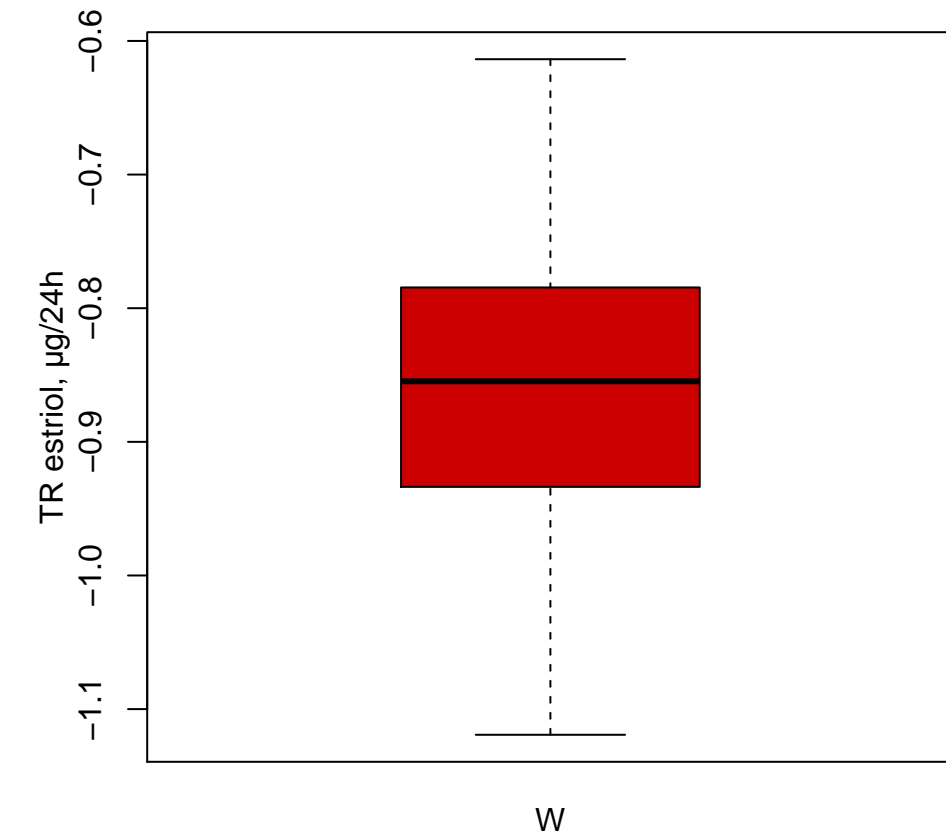

(e) D vs N:  $\delta = -0.07$   $p = 0.287$

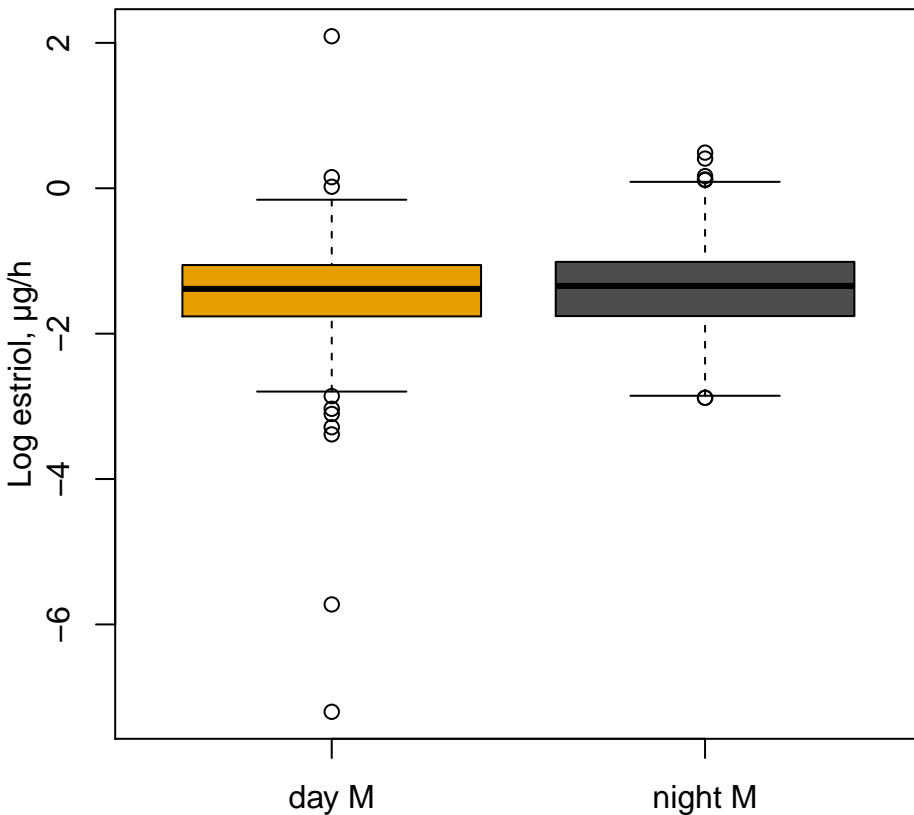

(f) D vs N:  $\delta = -0.01$   $p = 0.984$

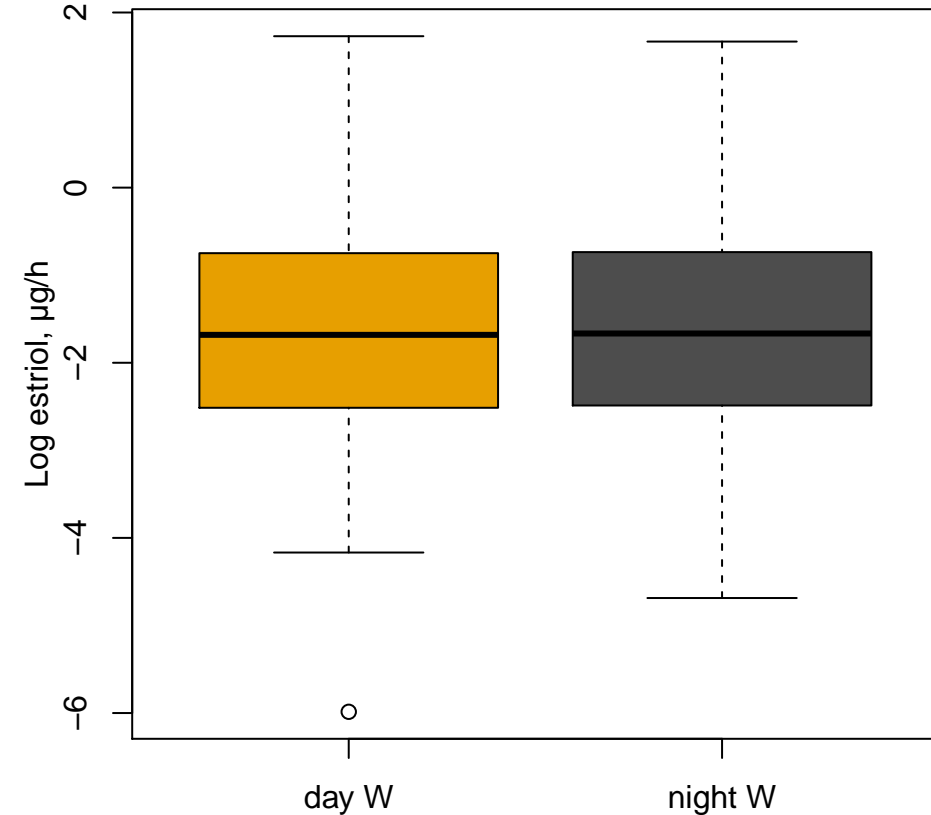

(g) M :  $\rho = 0.654$   $n = 454$

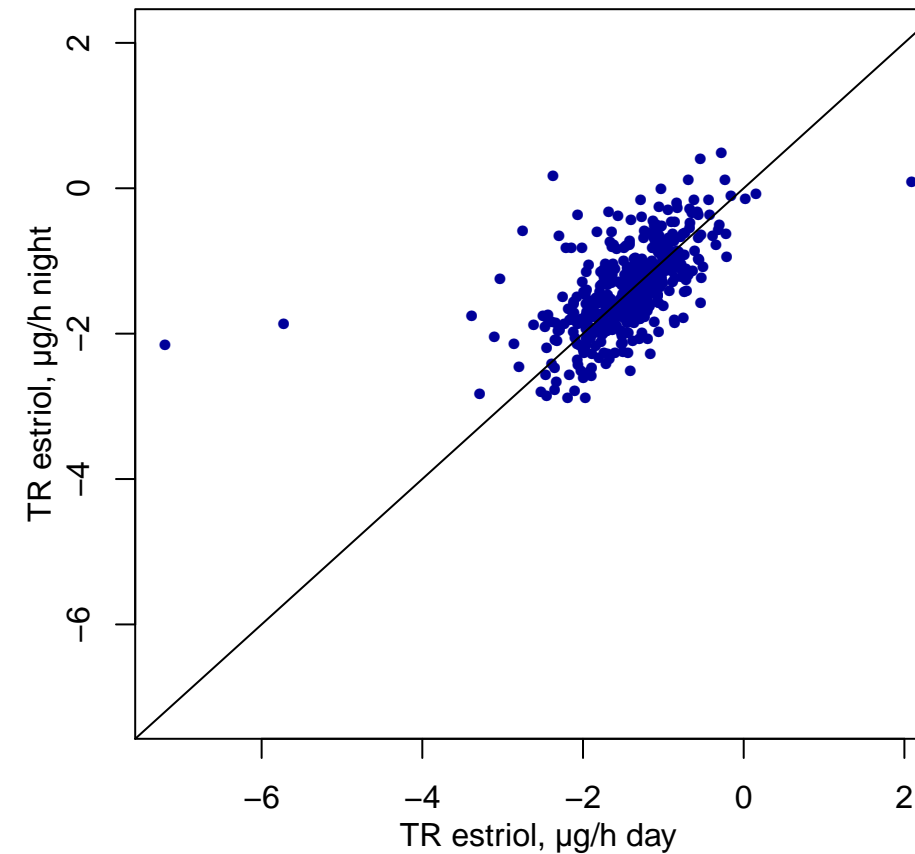

(h) W :  $\rho = 0.891$   $n = 374$

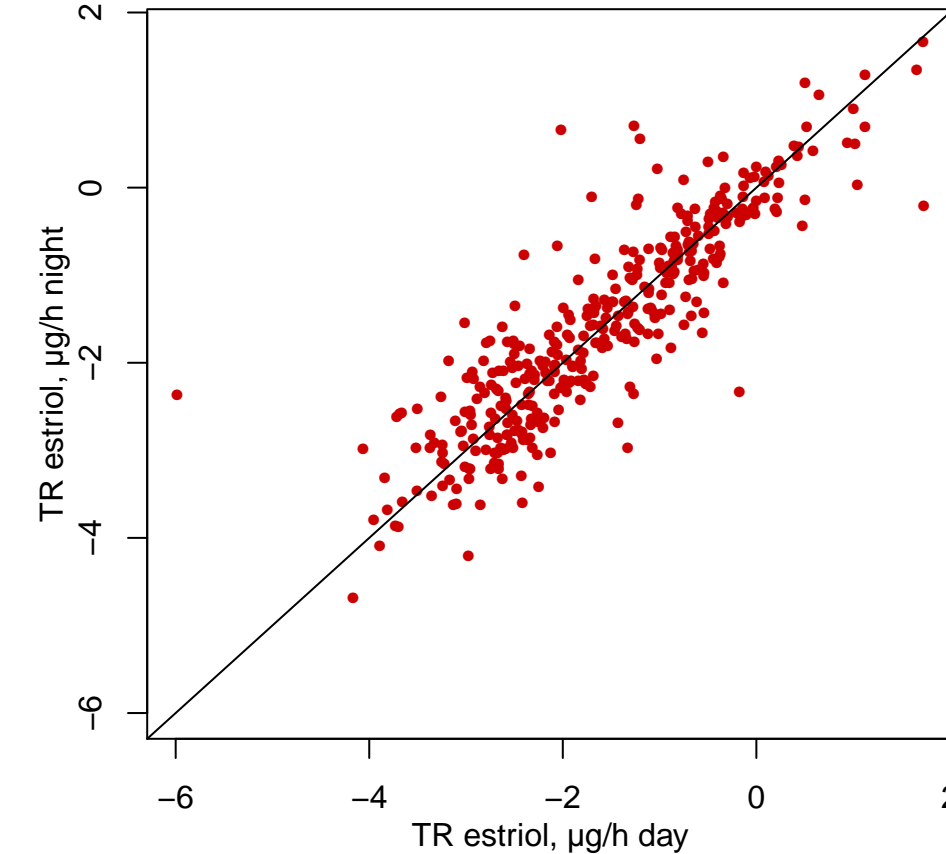

(a) M vs W:  $\delta = 0.29$   $p = 0.001$

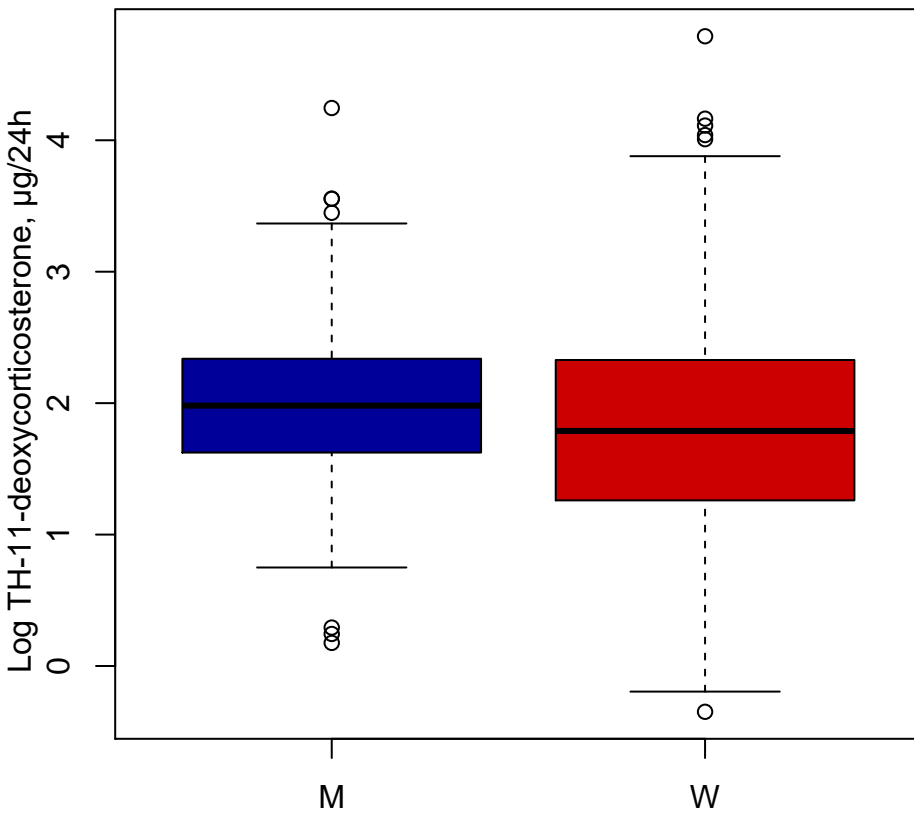

(b) M:  $p = 0$  W:  $p = 0$

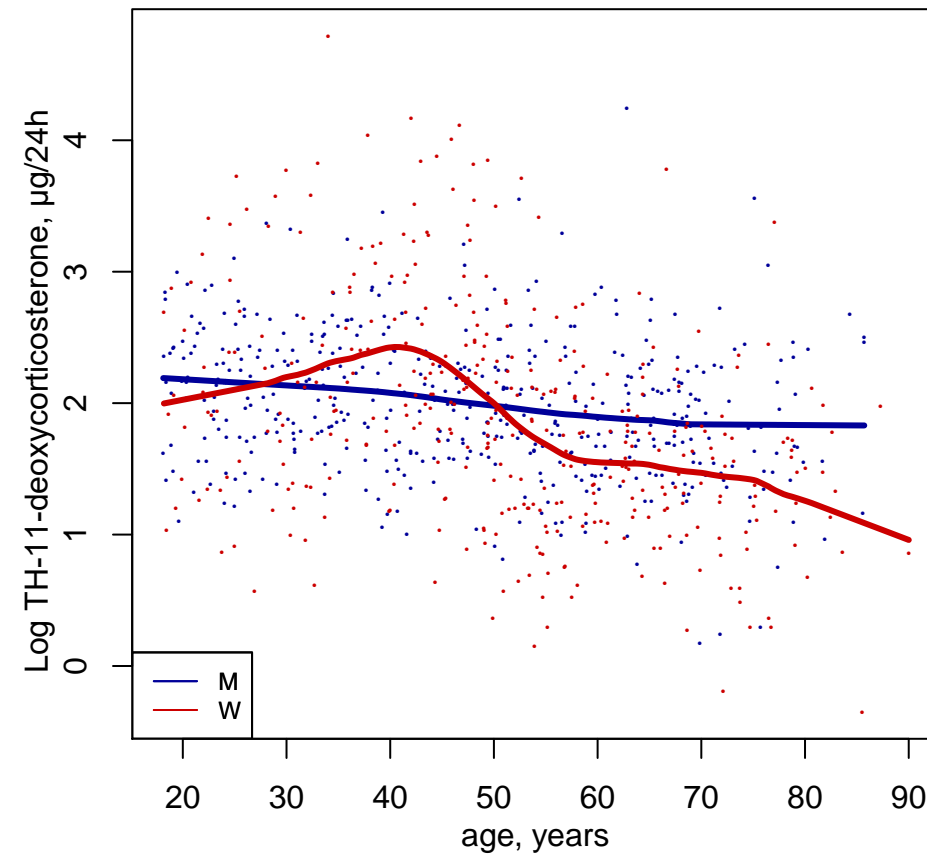

(c) TR= 0 nout= 1 sk= 0.02 ku= 0.36

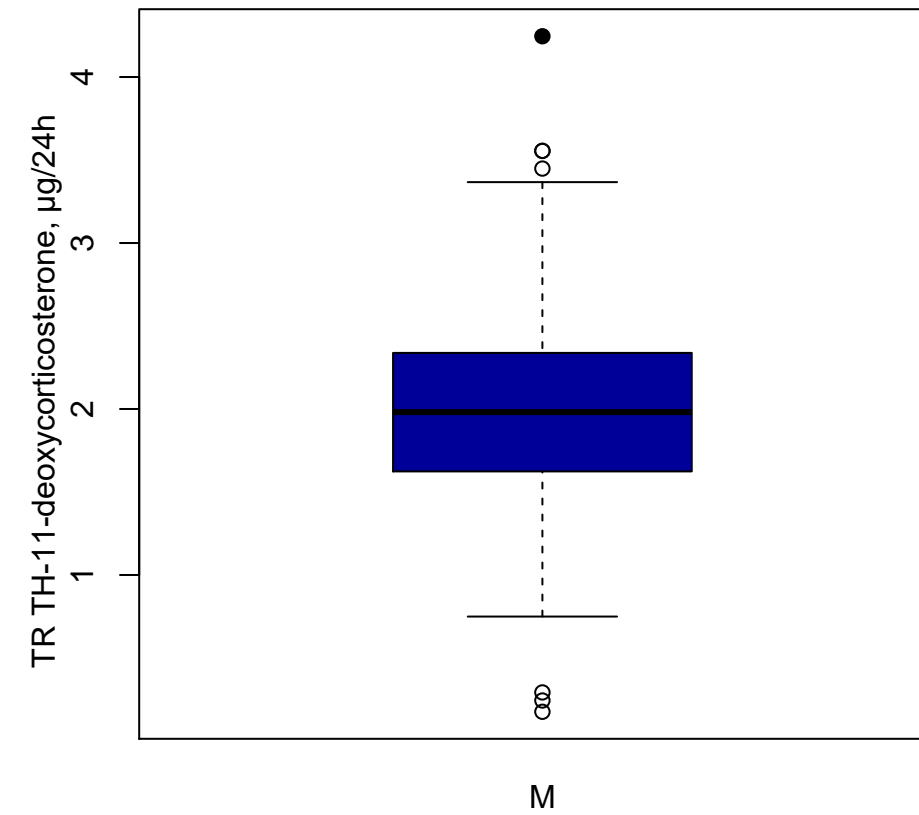

(d) TR= -0.2 nout= 0 sk= 0.02 ku= 0.36

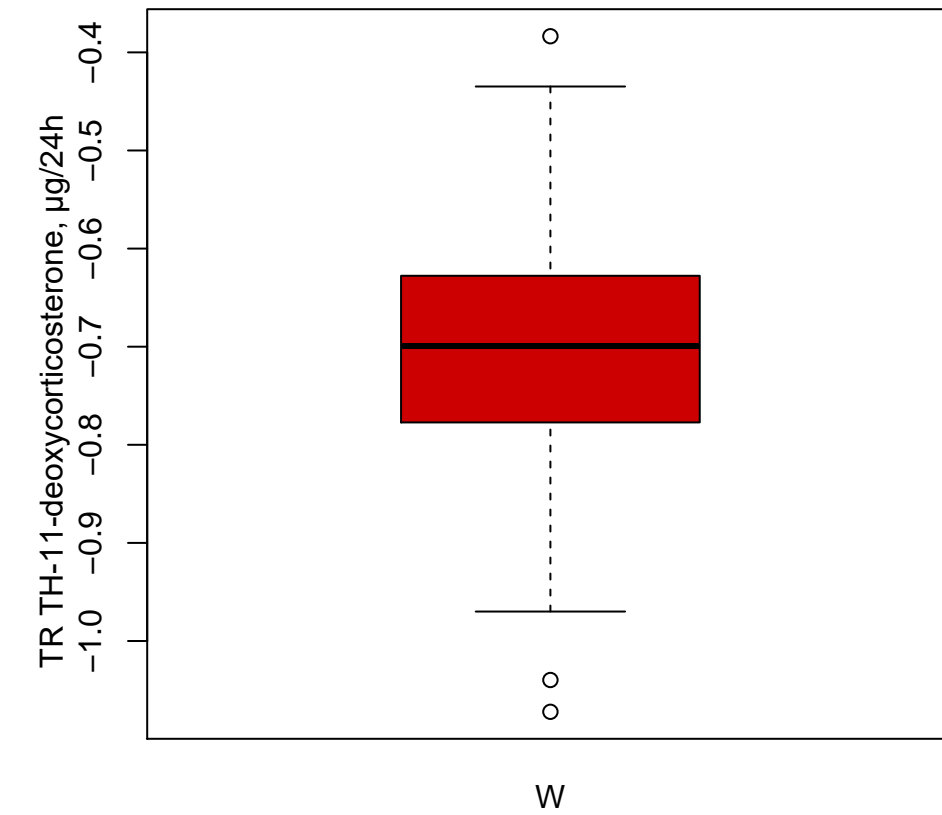

(e) D vs N:  $\delta = 0.26$   $p = 0$

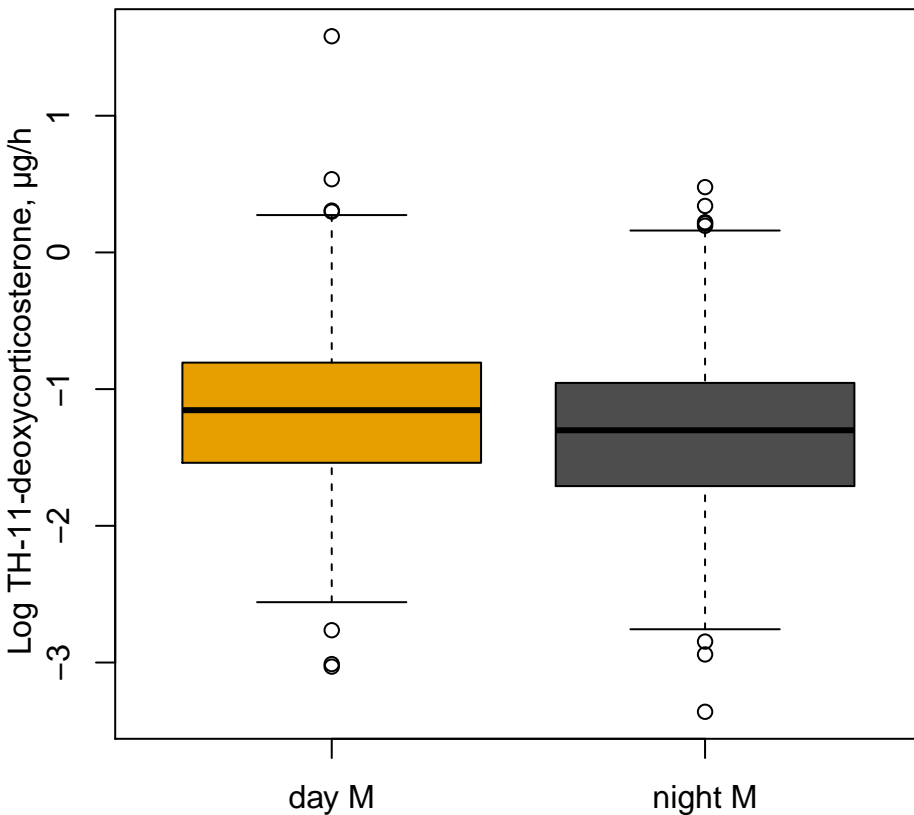

(f) D vs N:  $\delta = 0.19$   $p = 0$

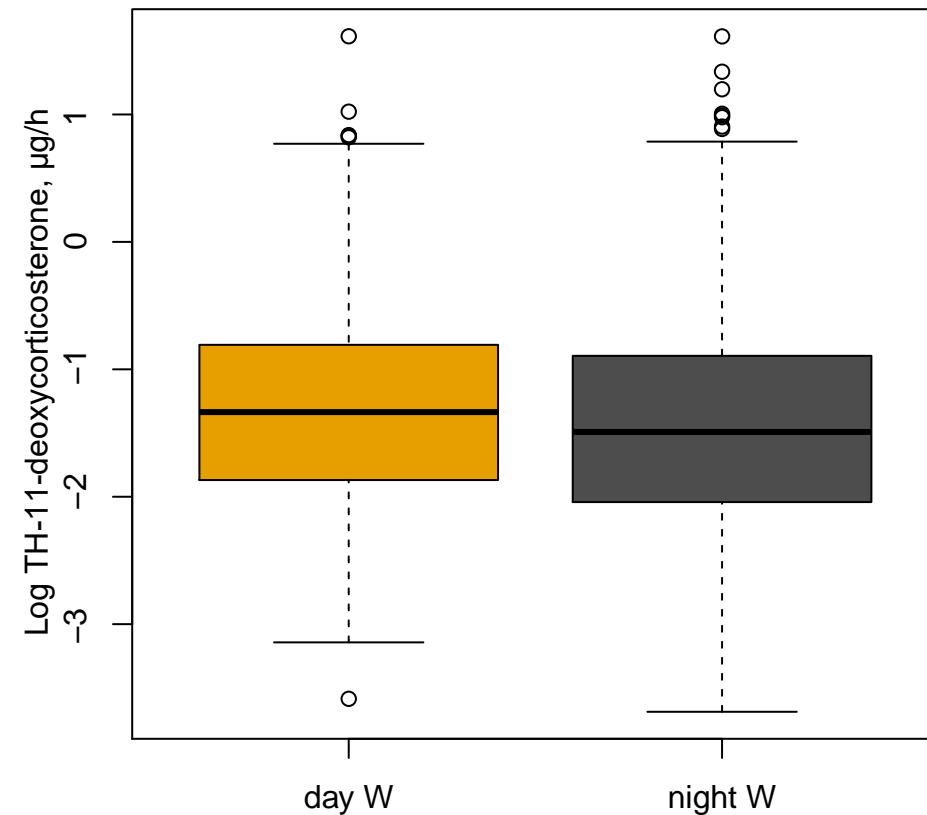

(g) M :  $\rho = 0.653$   $n = 453$

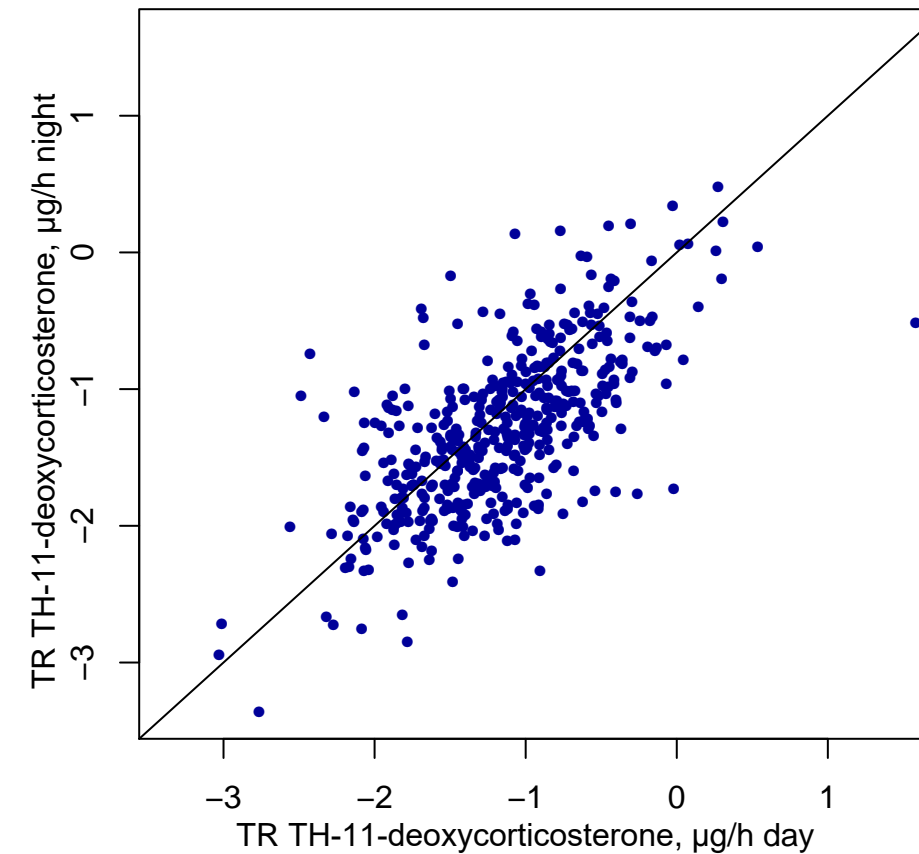

(h) W :  $\rho = 0.851$   $n = 378$

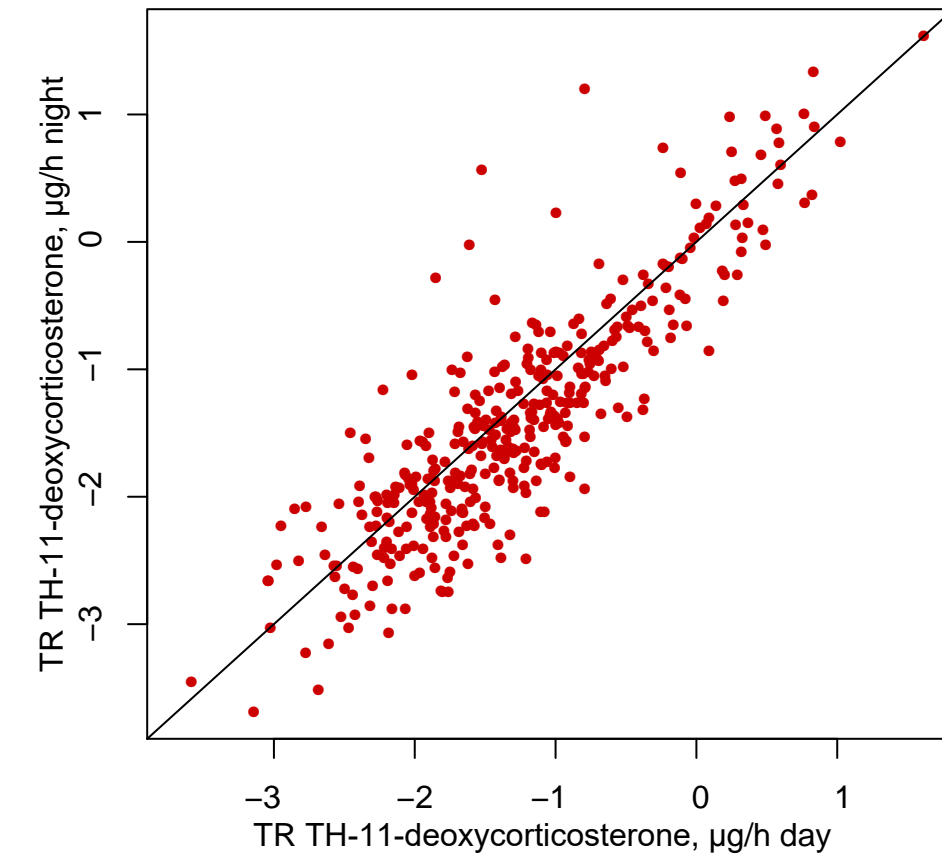

(a) M vs W:  $\delta = 0.72$   $p = 0$

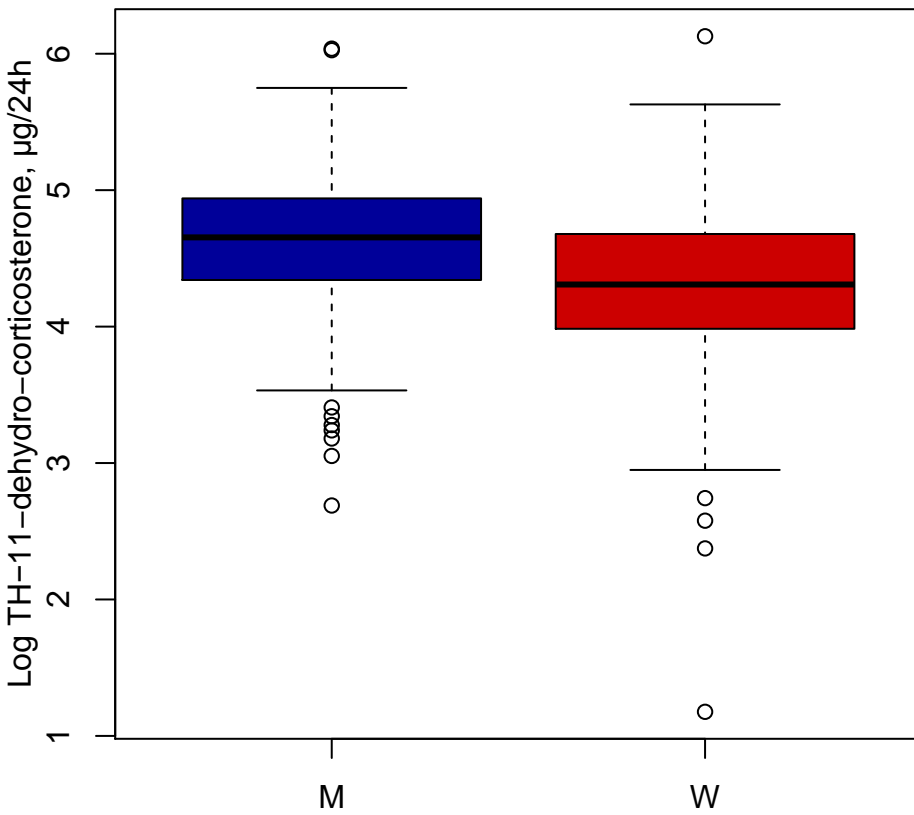

(b) M:  $p = 0$  W:  $p = 0.001$

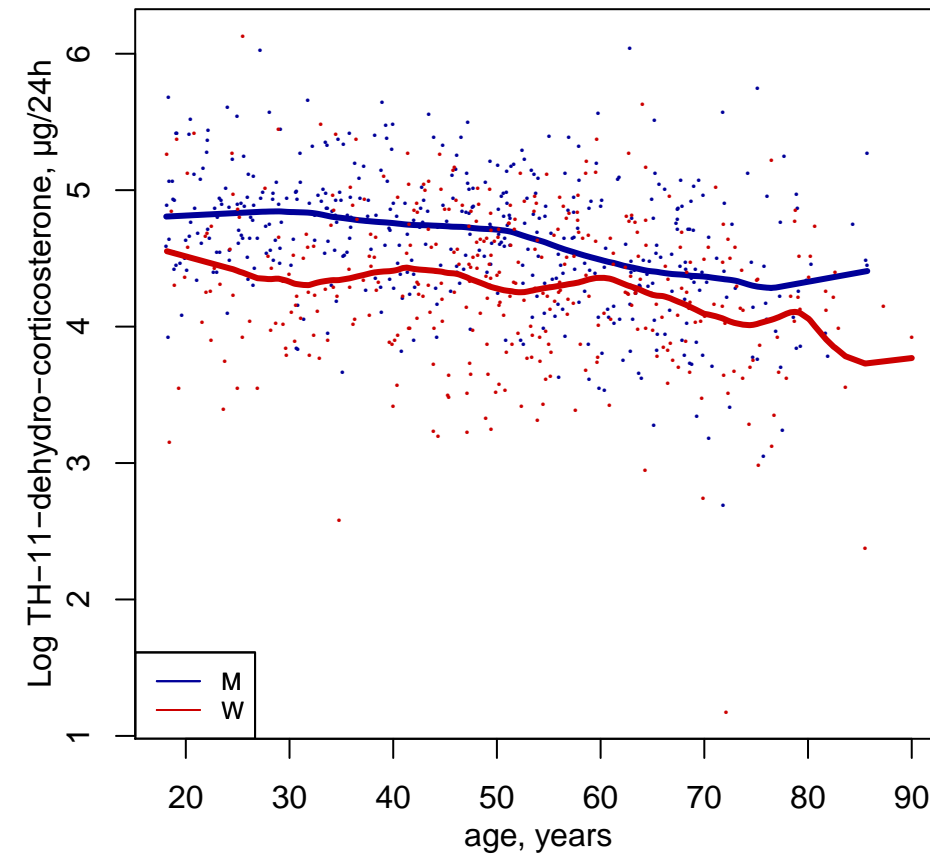

(c)  $\text{TR} = 0.2$   $\text{nout} = 0$   $\text{sk} = 0$   $\text{ku} = 0.28$

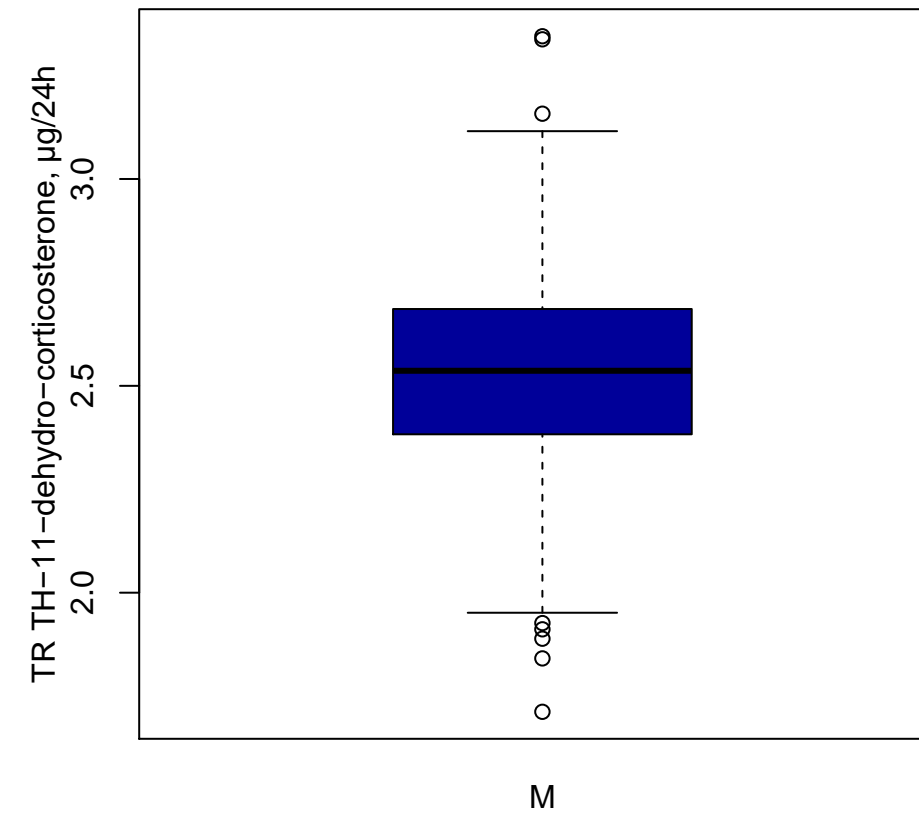

(d)  $\text{TR} = 0.1$   $\text{nout} = 1$   $\text{sk} = -0.03$   $\text{ku} = 0.28$

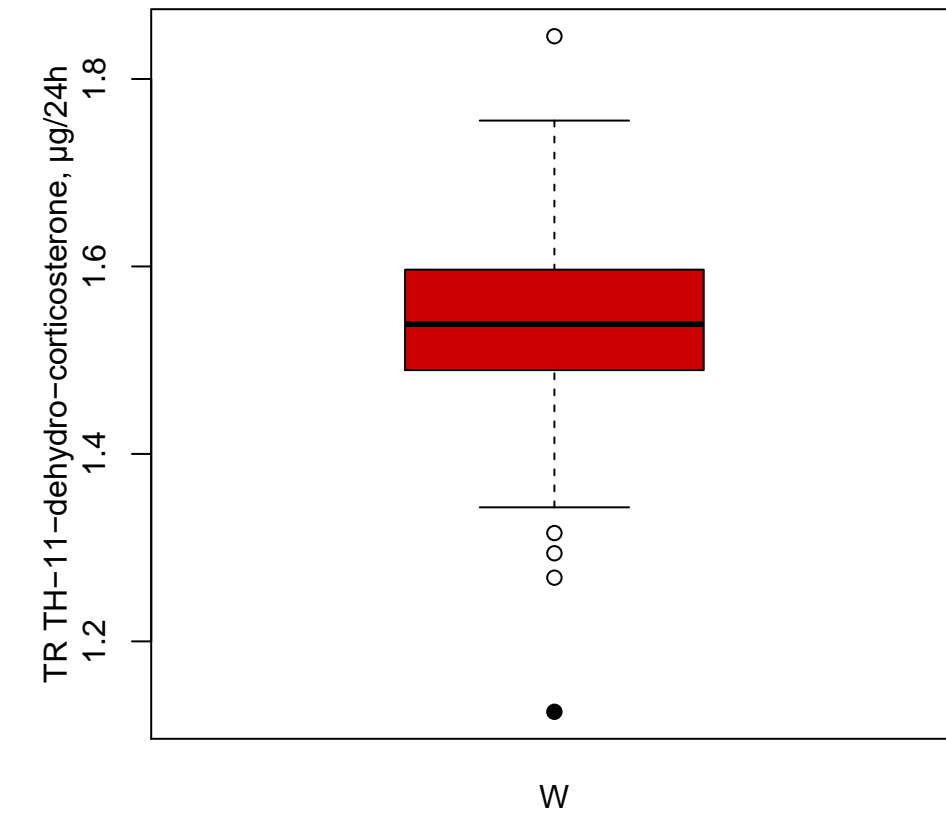

(e) D vs N:  $\delta = 0.65$   $p = 0$

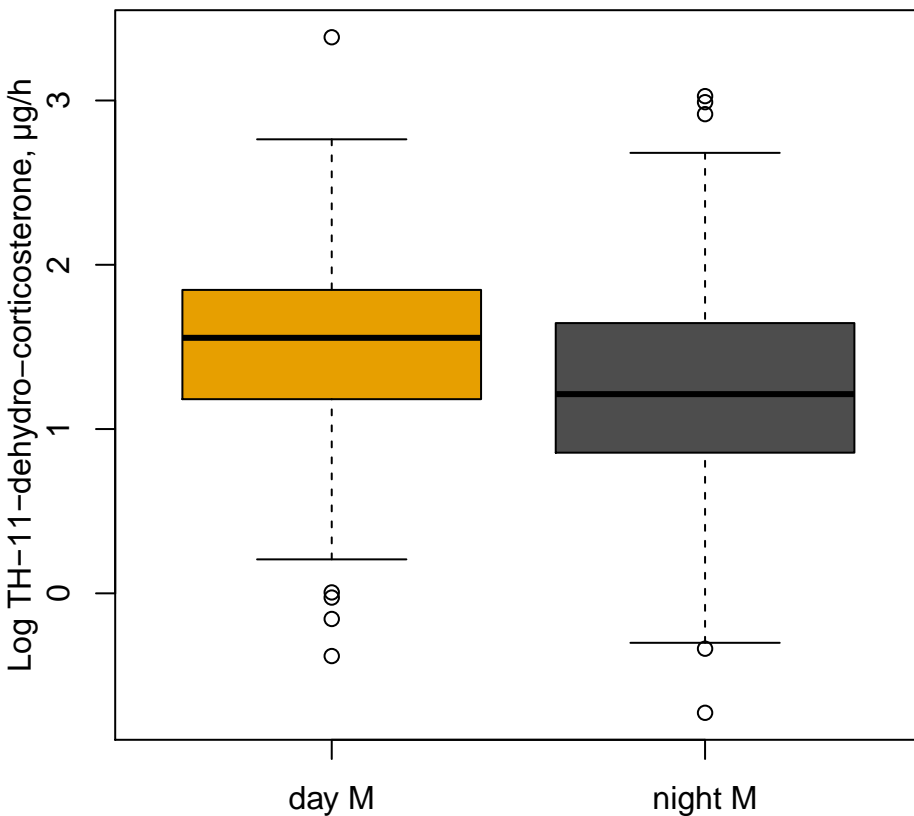

(f) D vs N:  $\delta = 0.49$   $p = 0$

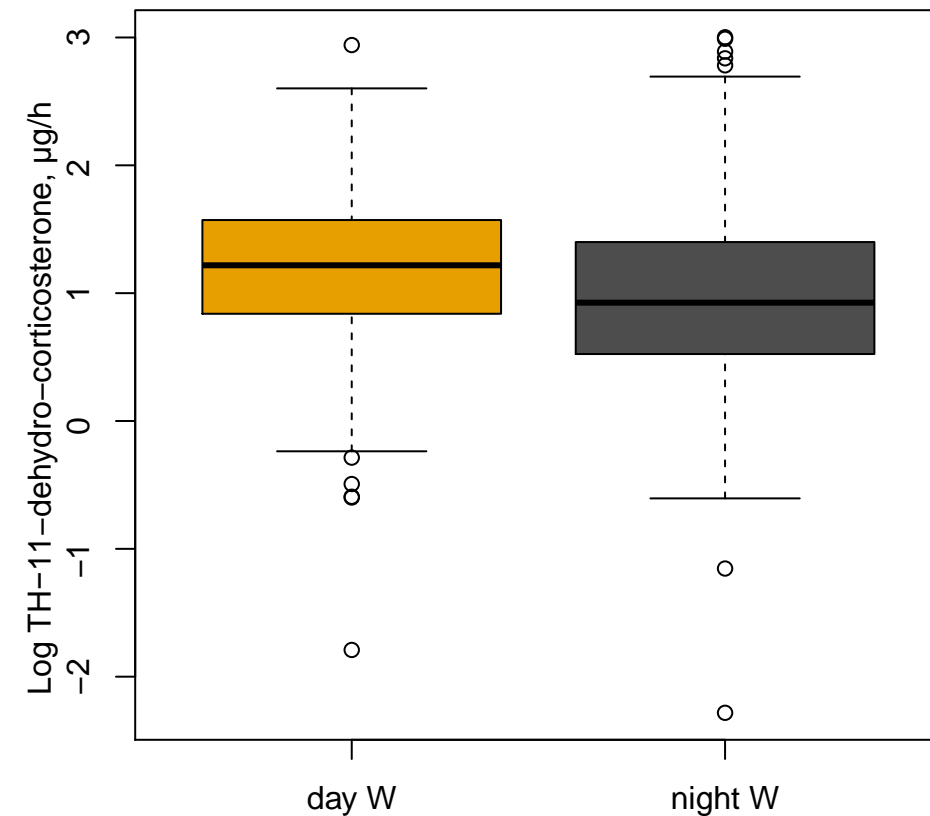

(g) M :  $\rho = 0.599$   $n = 450$

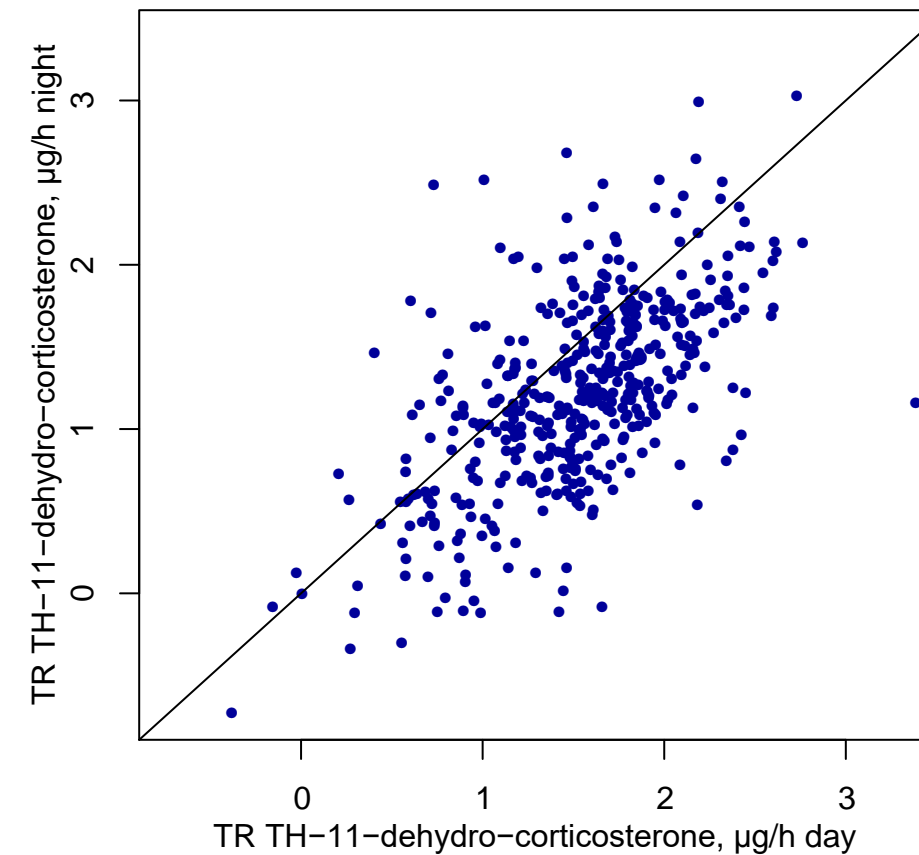

(h) W :  $\rho = 0.677$   $n = 379$

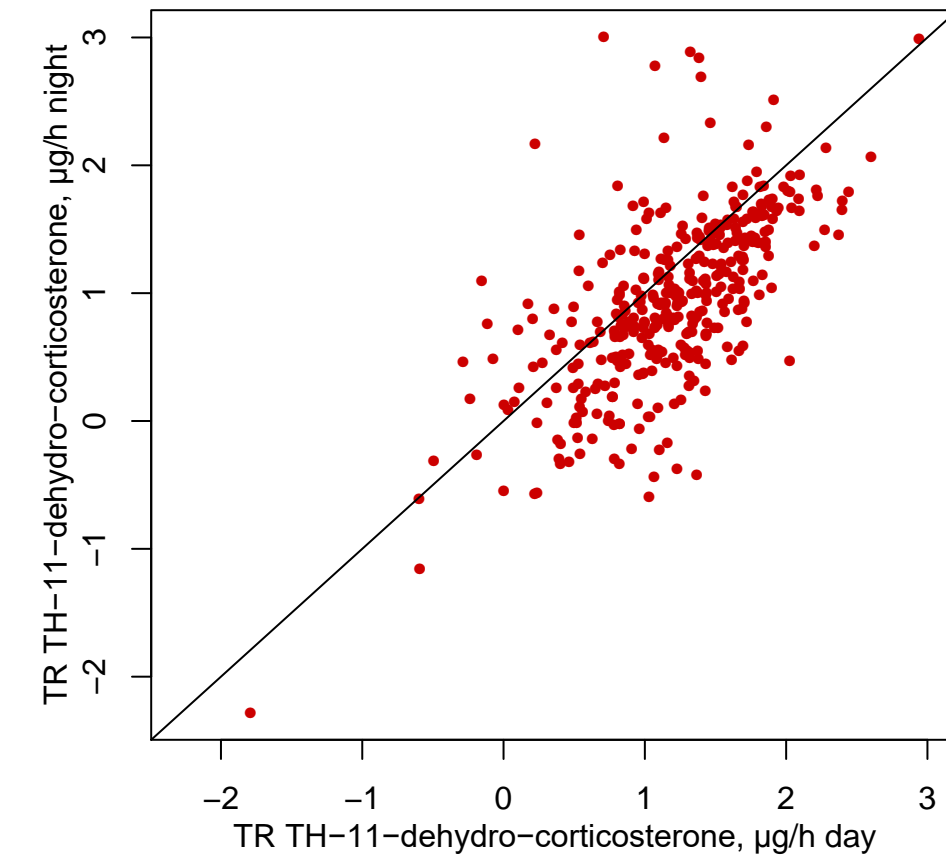

(a) M vs W: delta= 0.73 p = 0

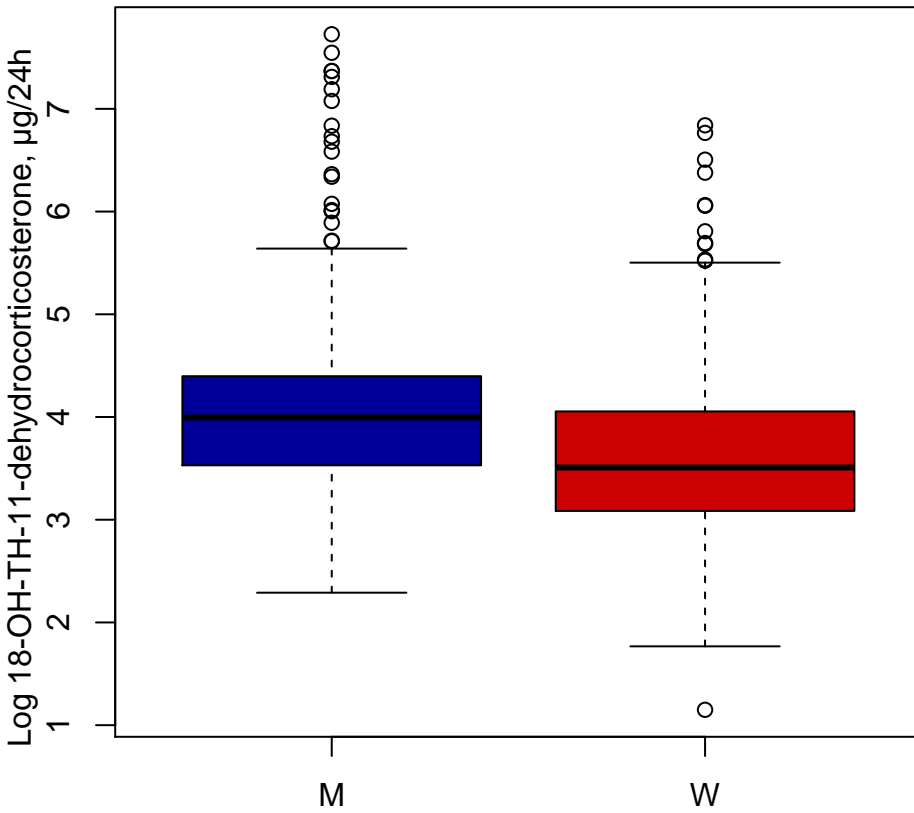

(b) M: p = 0.204 W: p = 0.217

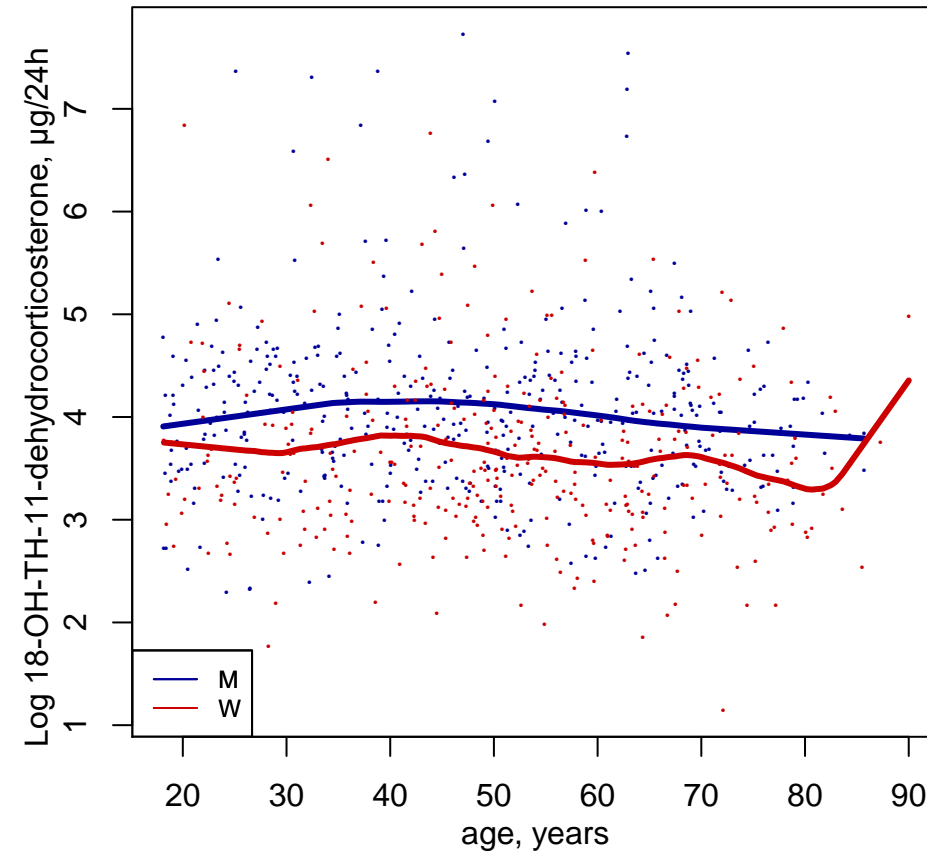

(c) TR= -0.2 nout= 2 sk= 0.35 ku= 1.28

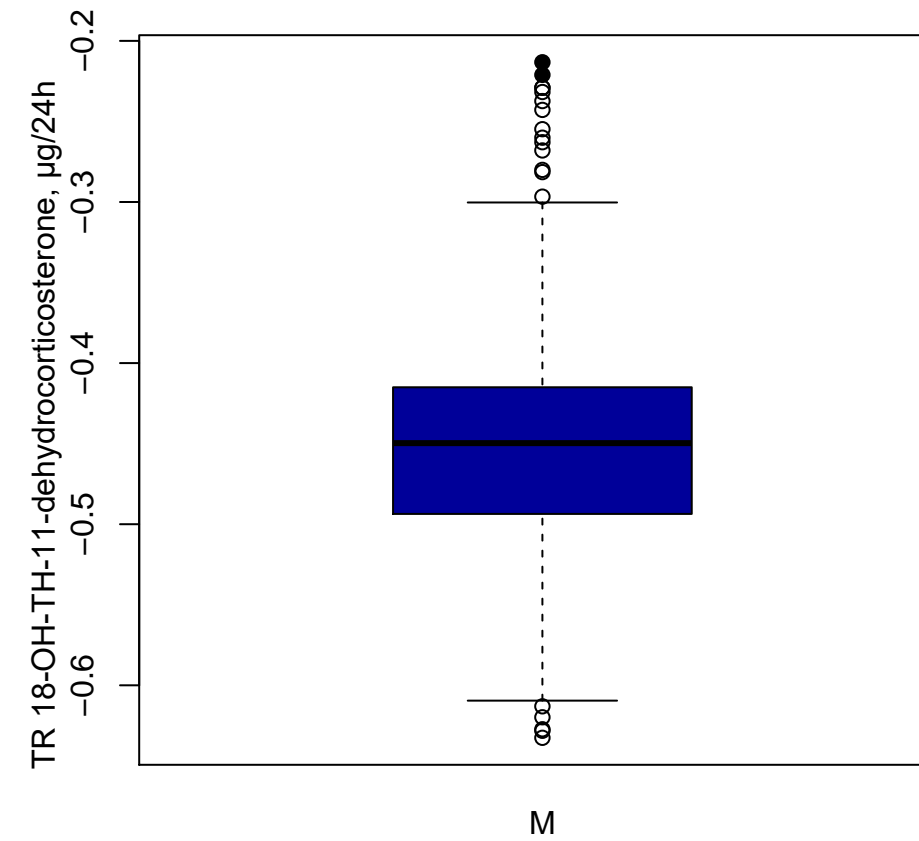

(d) TR= -0.3 nout= 1 sk= 0.03 ku= 1.28

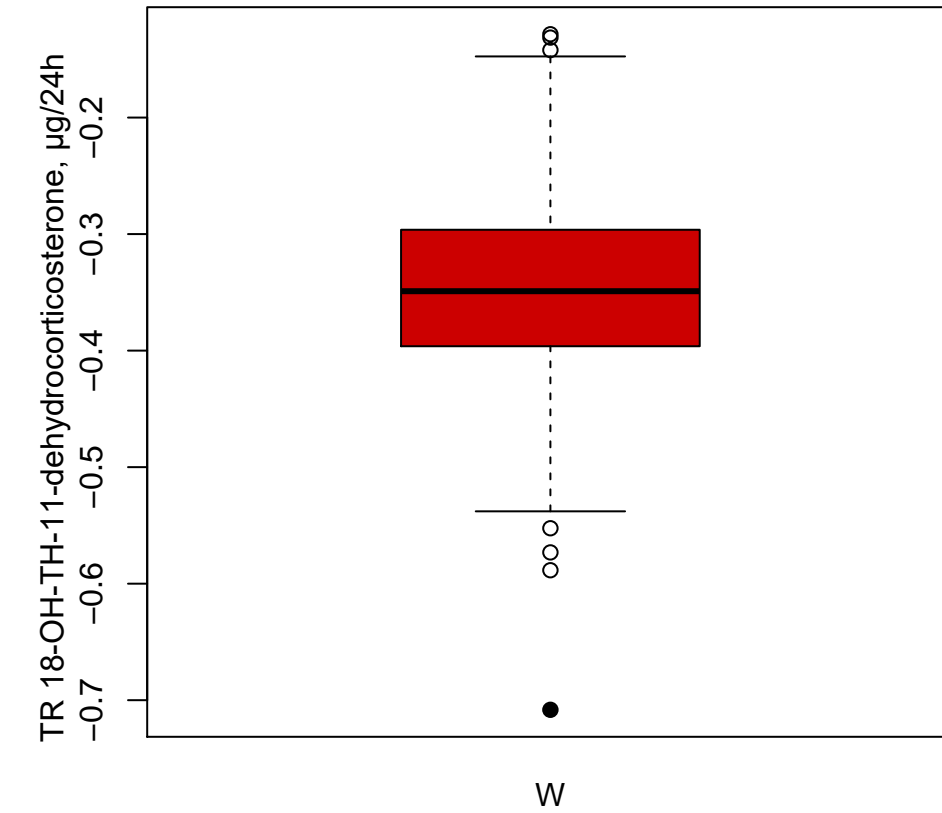

(e) D vs N: delta= 0.33 p = 0

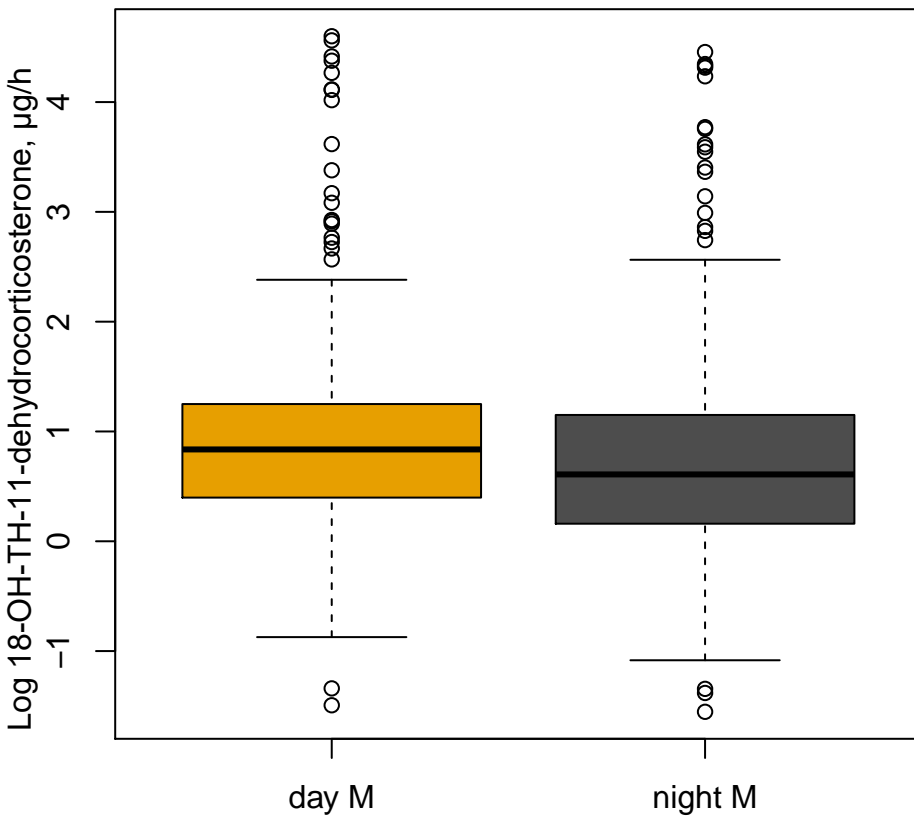

(f) D vs N: delta= 0.4 p = 0

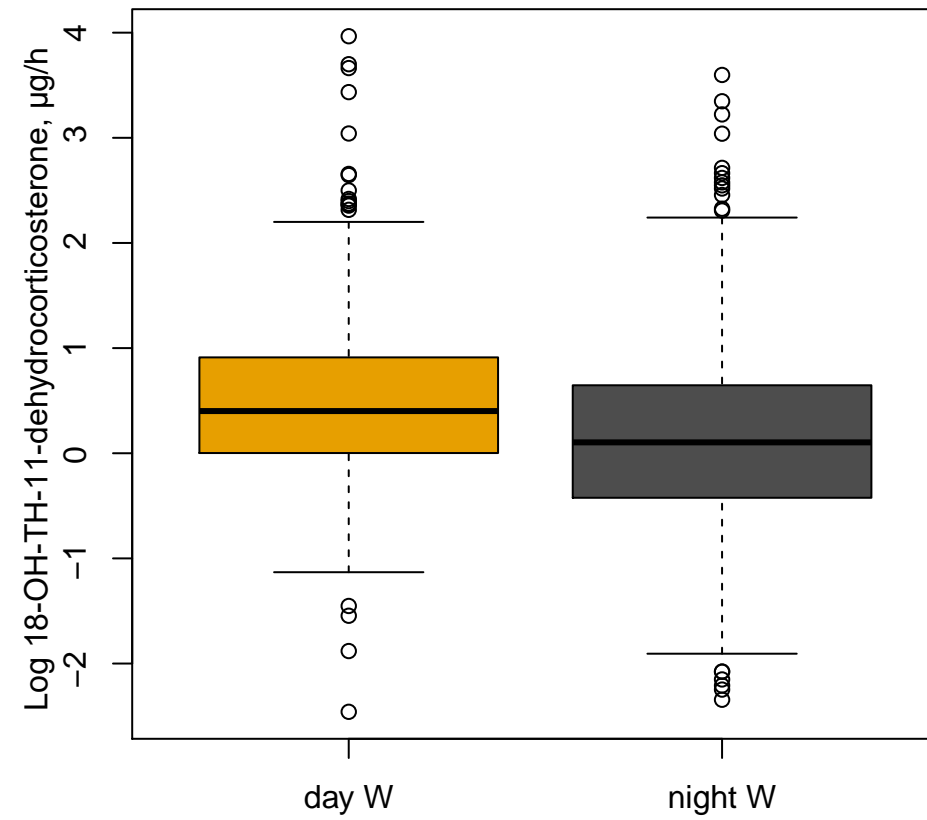

(g) M : rho= 0.673 n= 431

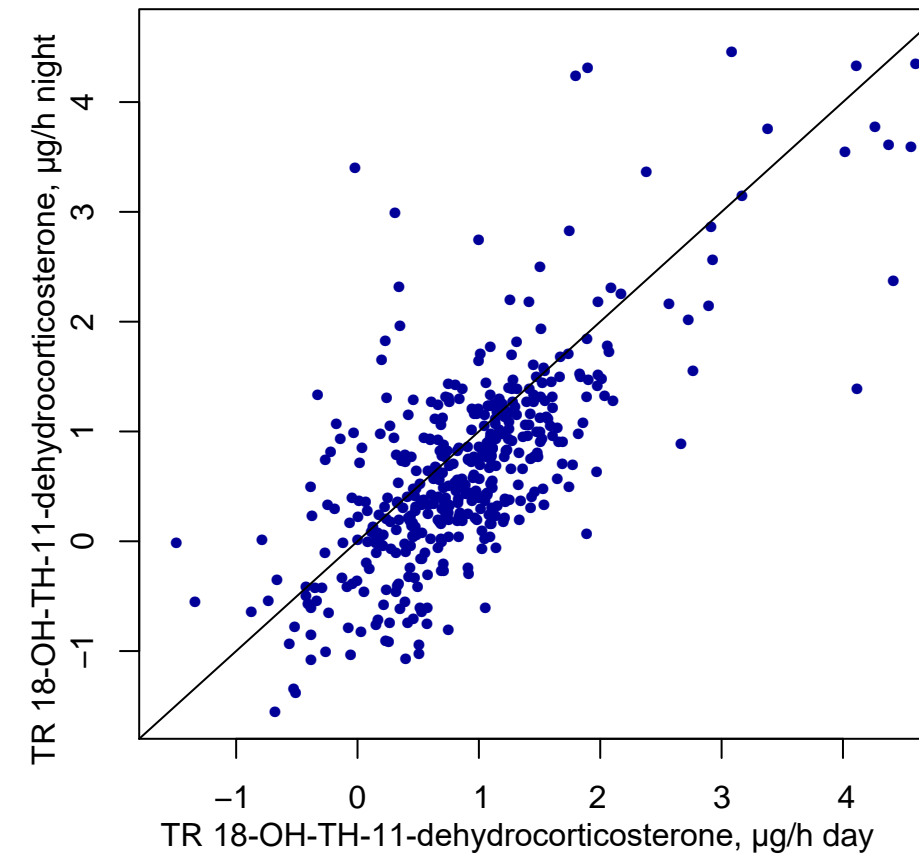

(h) W : rho= 0.668 n= 342

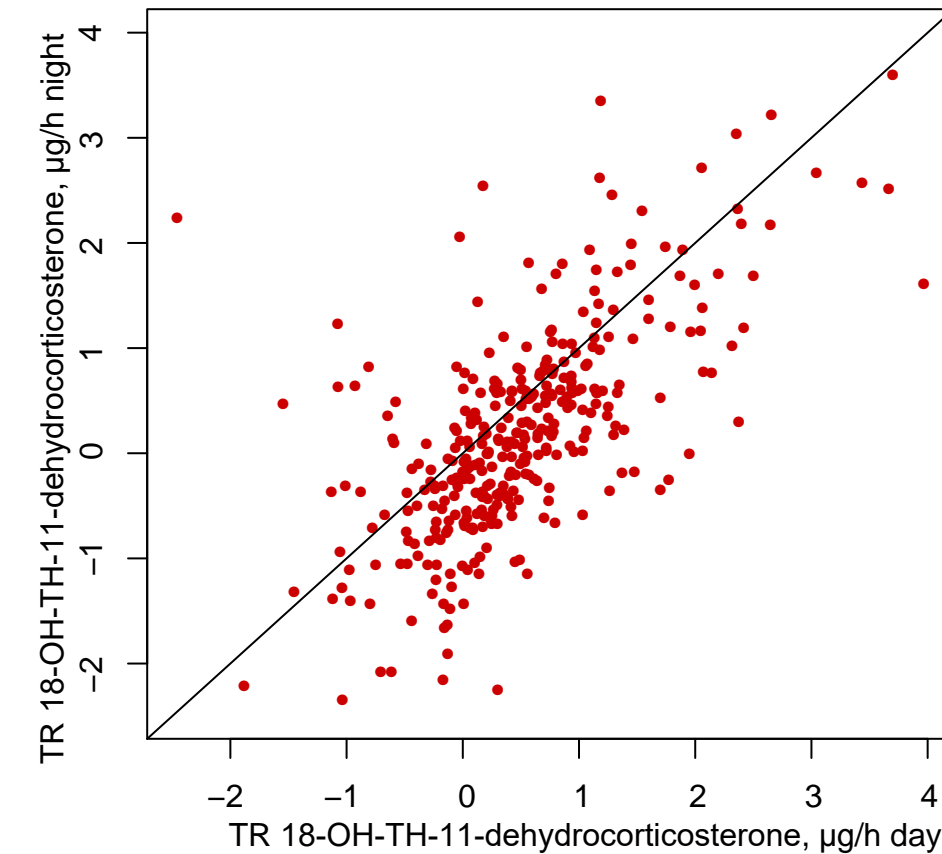

(a) M vs W:  $\delta = 0.53$   $p = 0$

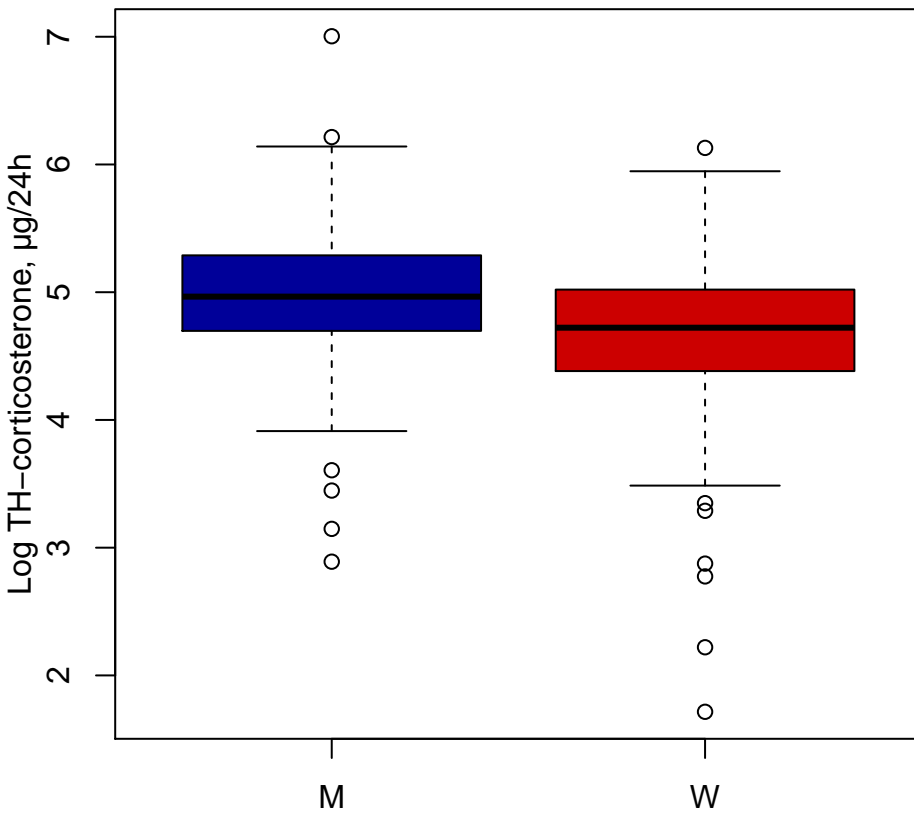

(b) M:  $p = 0.219$  W:  $p = 0.919$

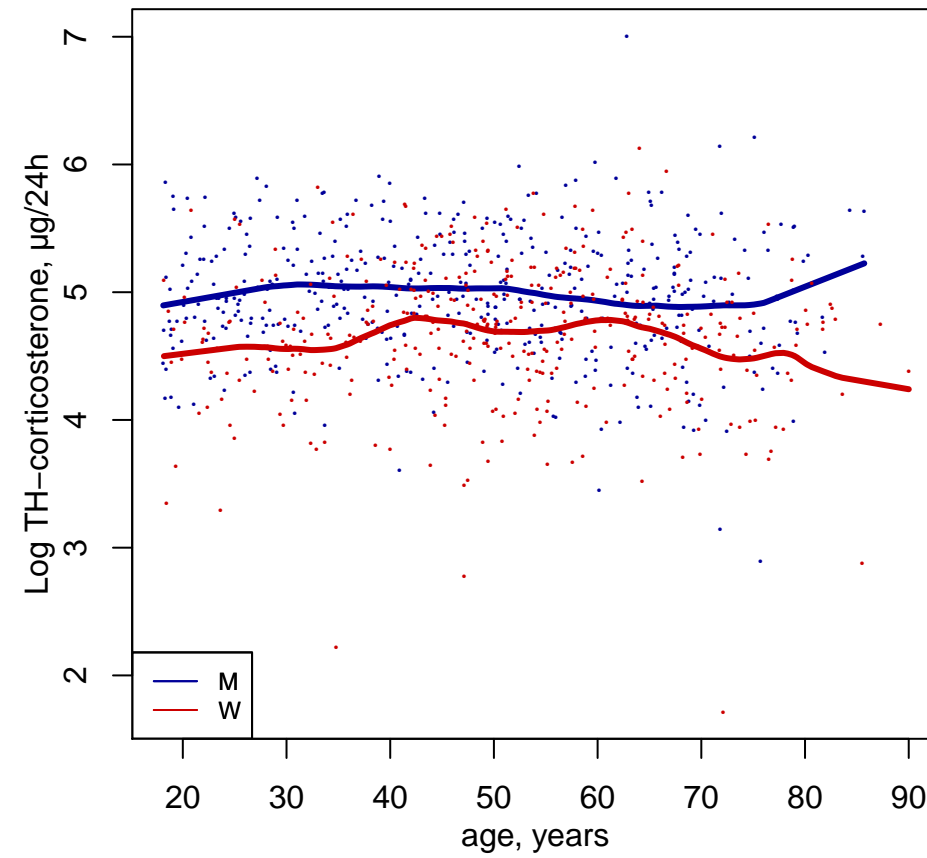

(c) TR= 0.2 nout= 2 sk= 0.06 ku= -0.02

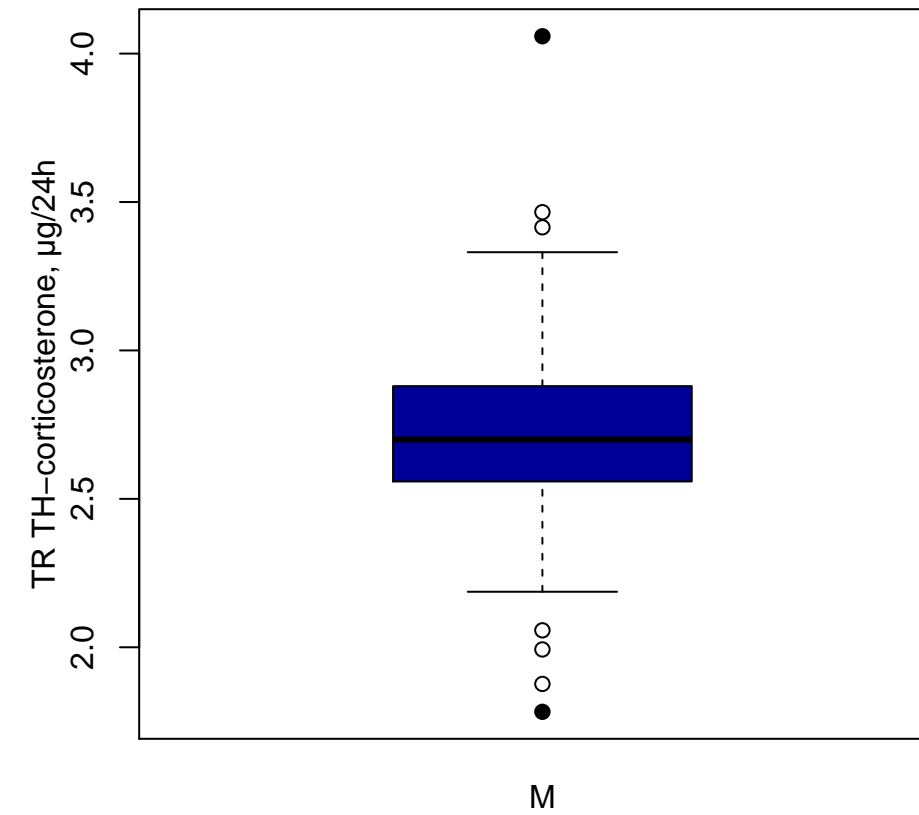

(d) TR= 0.2 nout= 2 sk= 0.02 ku= -0.02

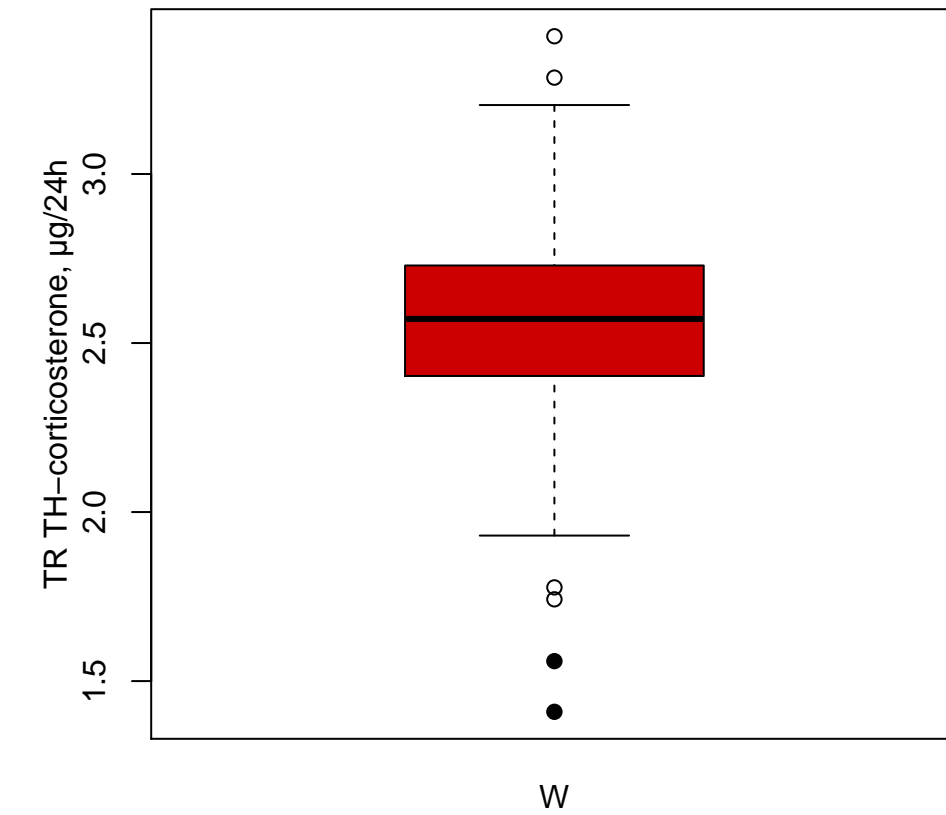

(e) D vs N:  $\delta = 0.35$   $p = 0$

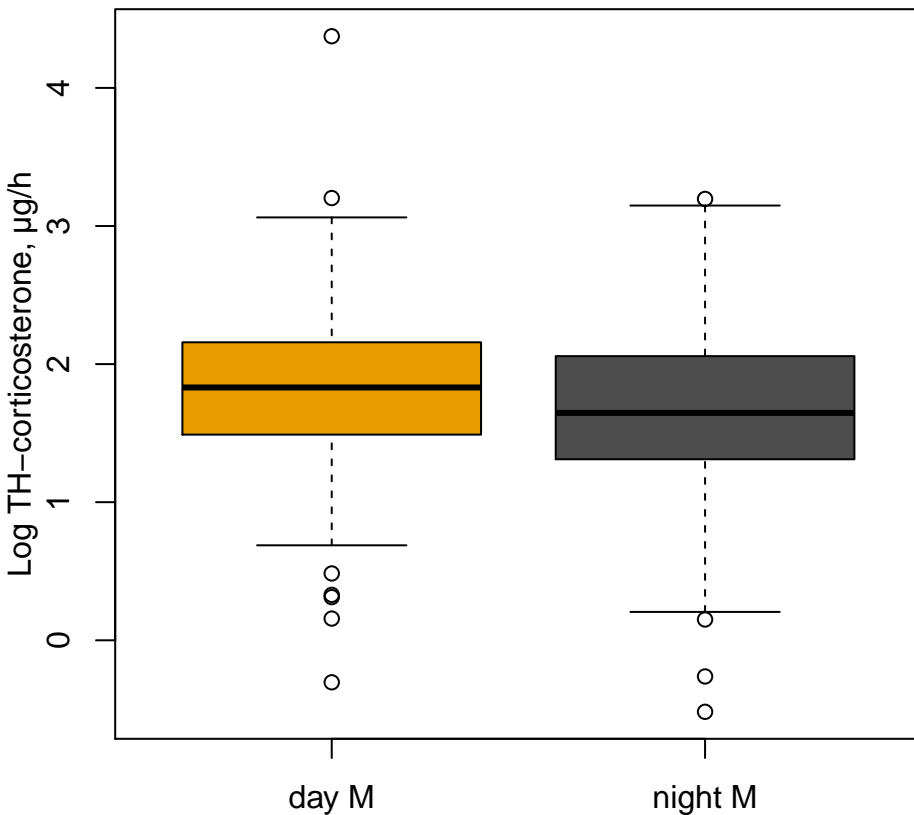

(f) D vs N:  $\delta = 0.26$   $p = 0$

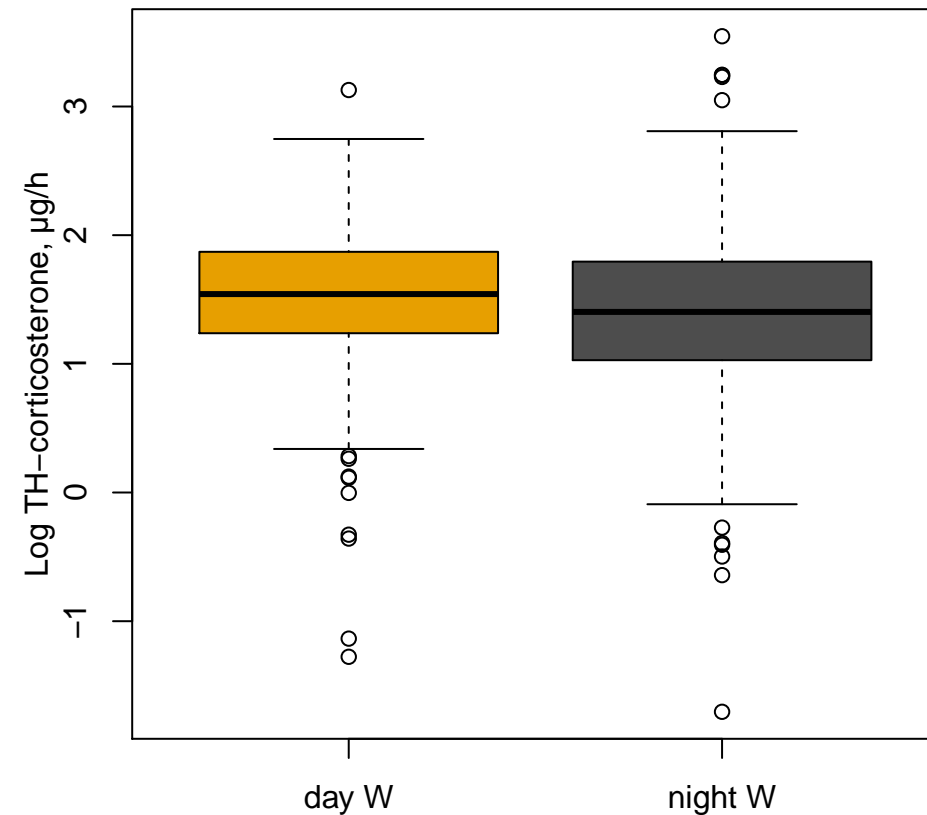

(g) M :  $\rho = 0.597$   $n = 455$

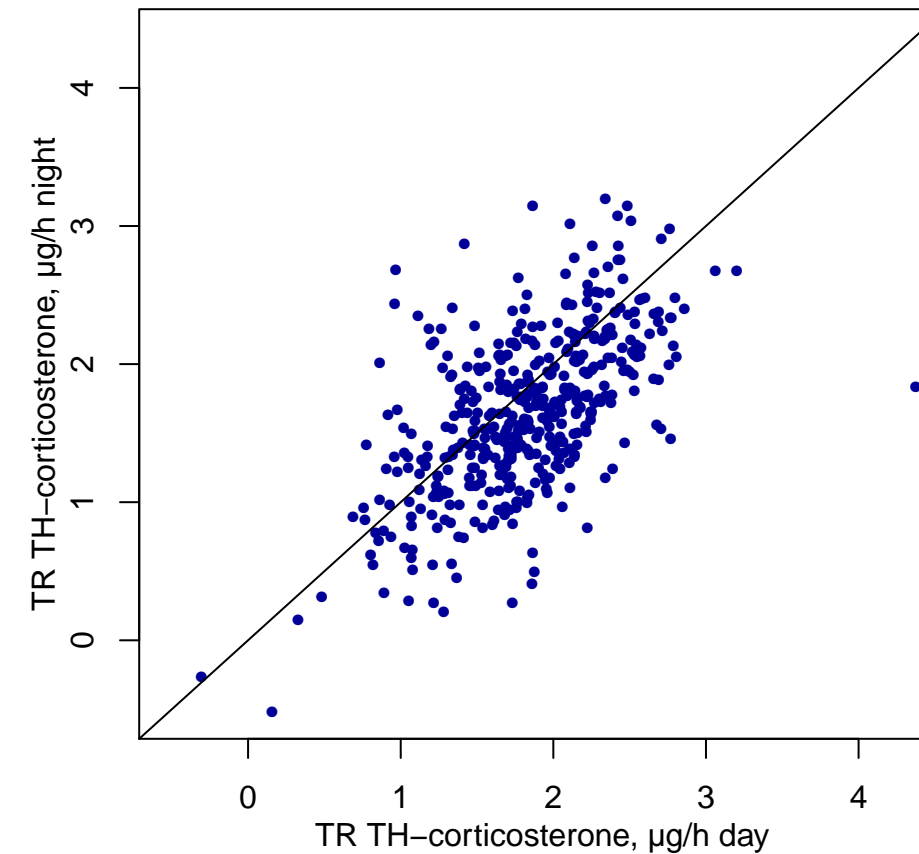

(h) W :  $\rho = 0.625$   $n = 379$

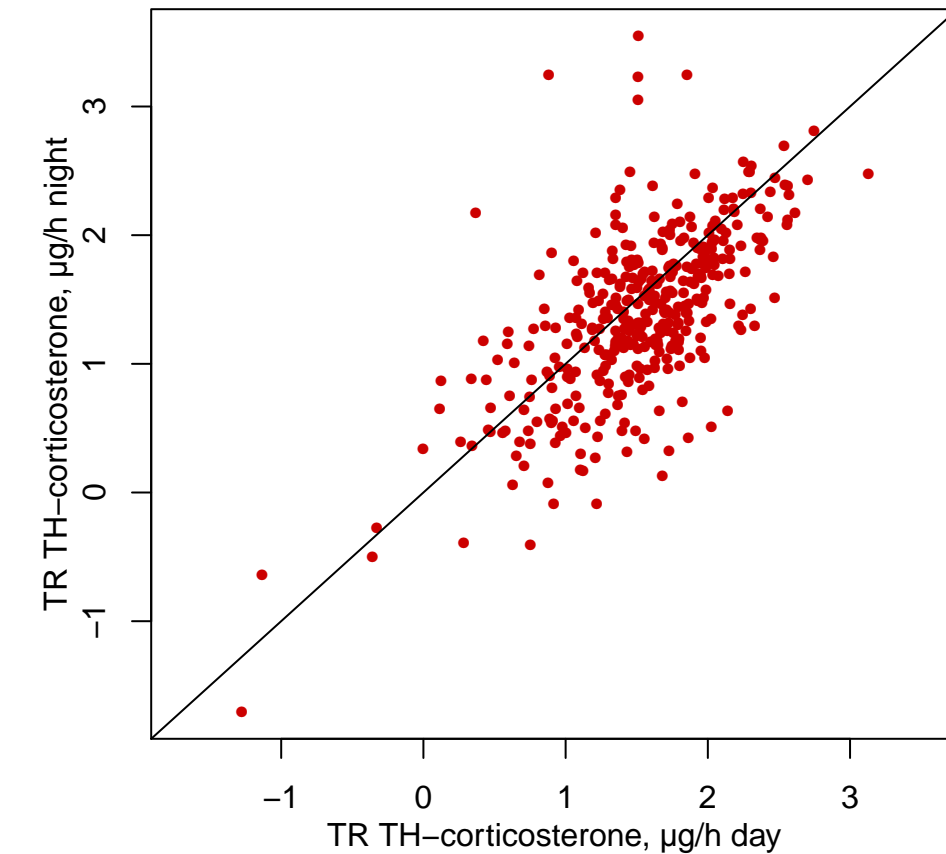

**(a) M vs W: delta= 1.13 p = 0**

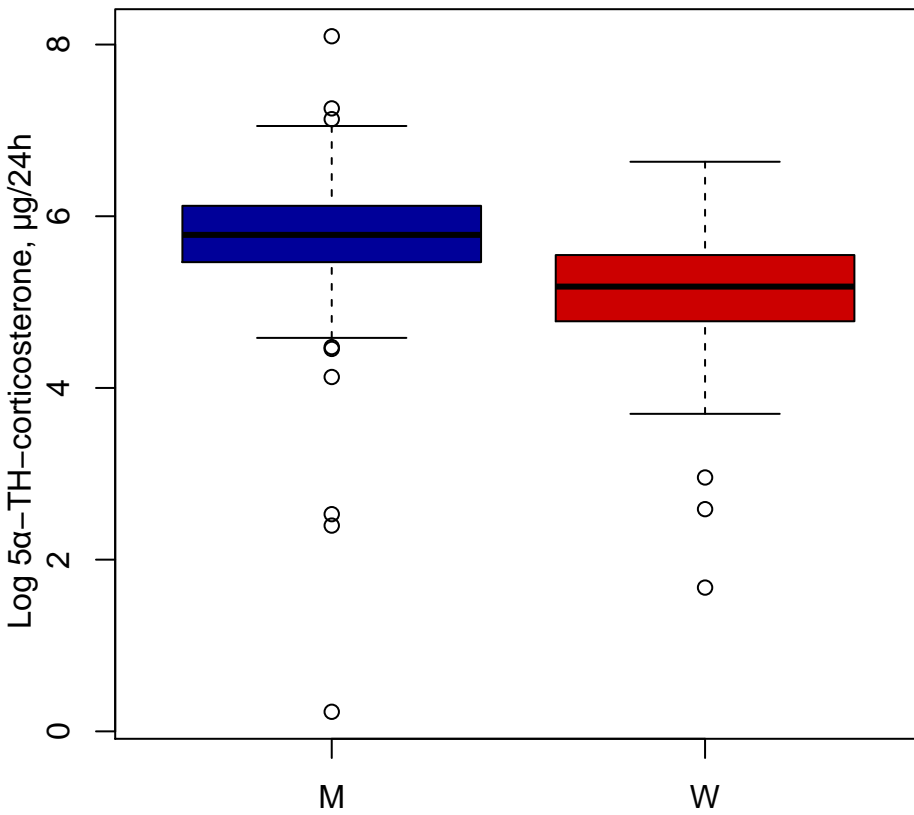

**(b) M: p = 0 W: p = 0.002**

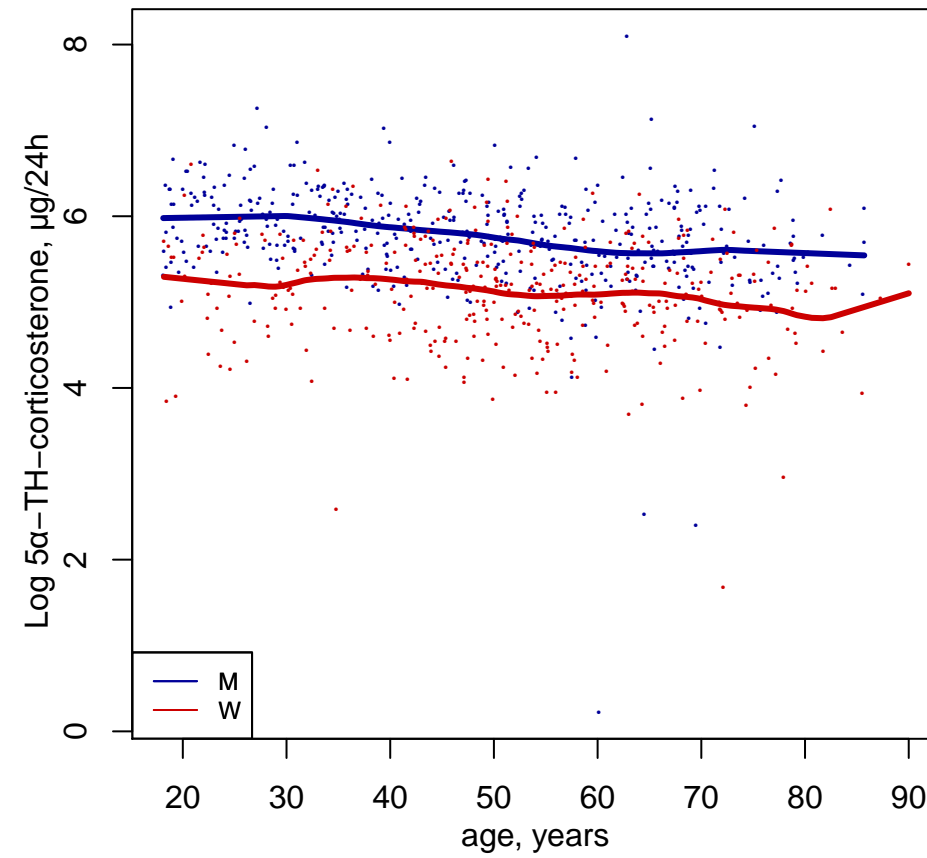

**(c) TR= 0 nout= 4 sk= -0.05 ku= 0.24**

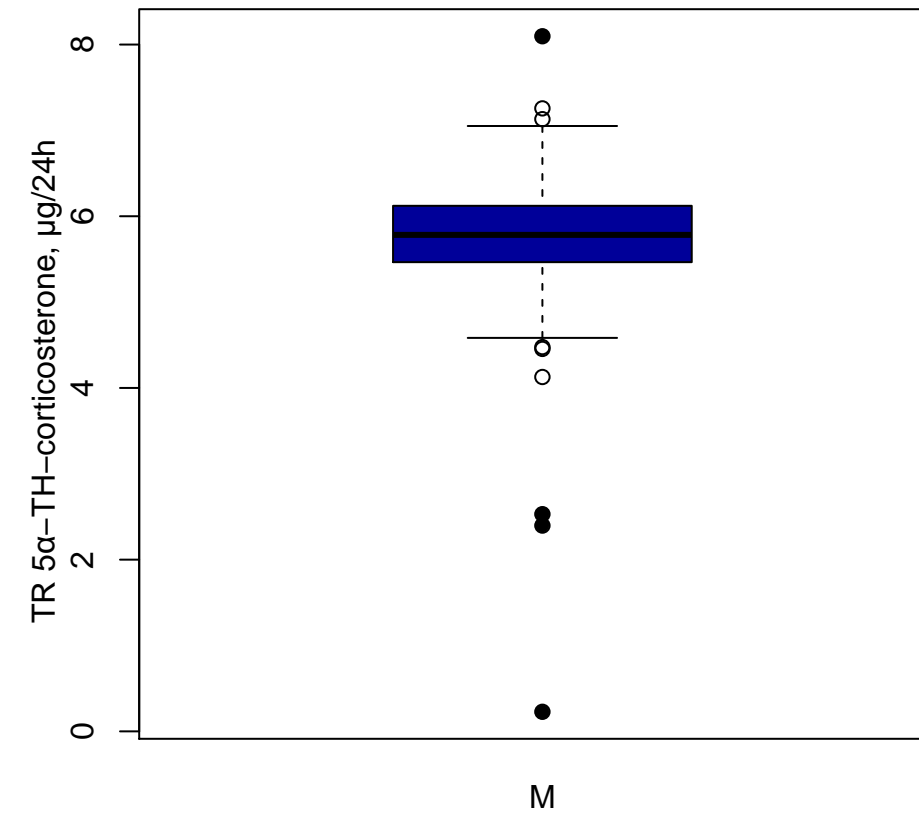

**(d) TR= 0.2 nout= 1 sk= -0.02 ku= 0.24**

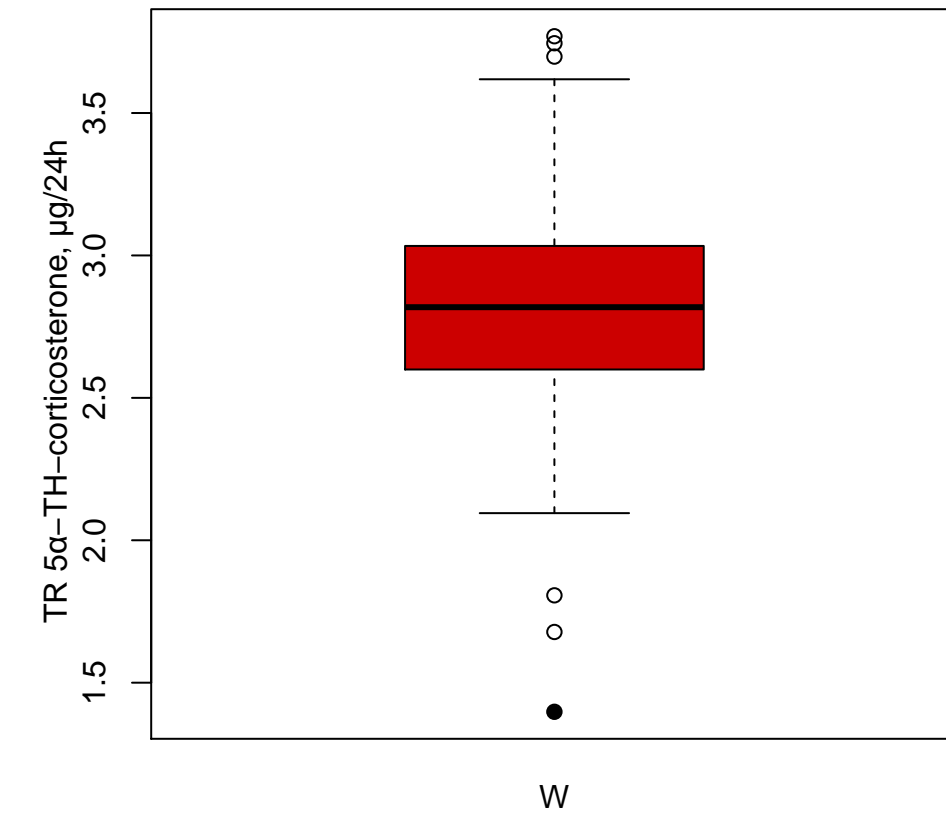

**(e) D vs N: delta= 0.93 p = 0**

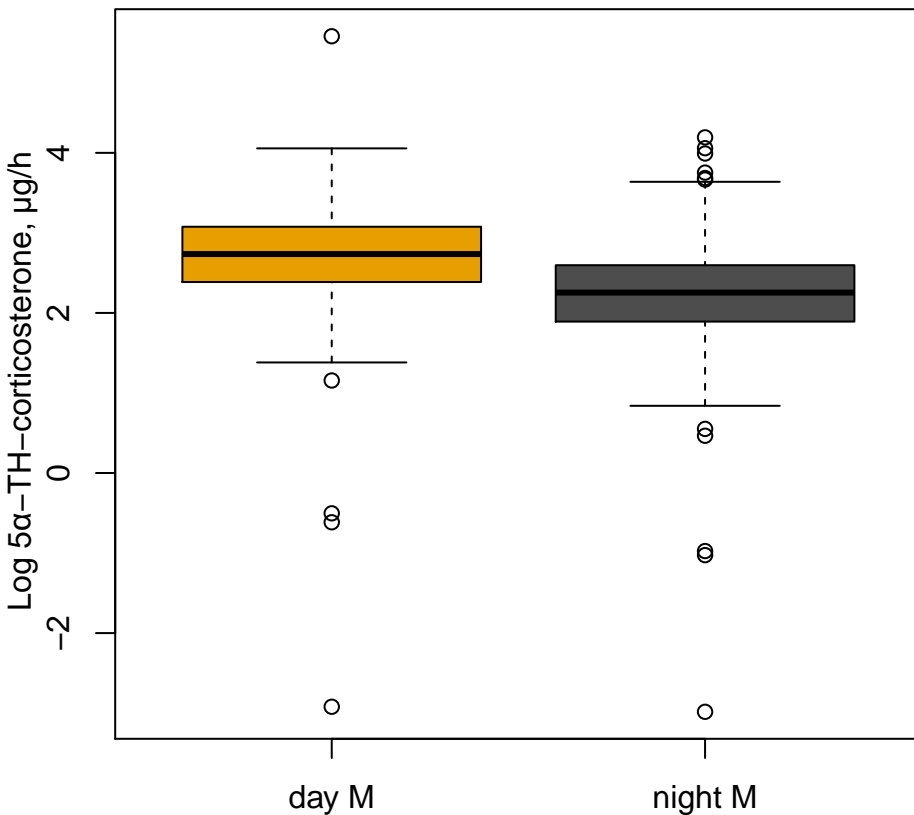

**(f) D vs N: delta= 0.77 p = 0**

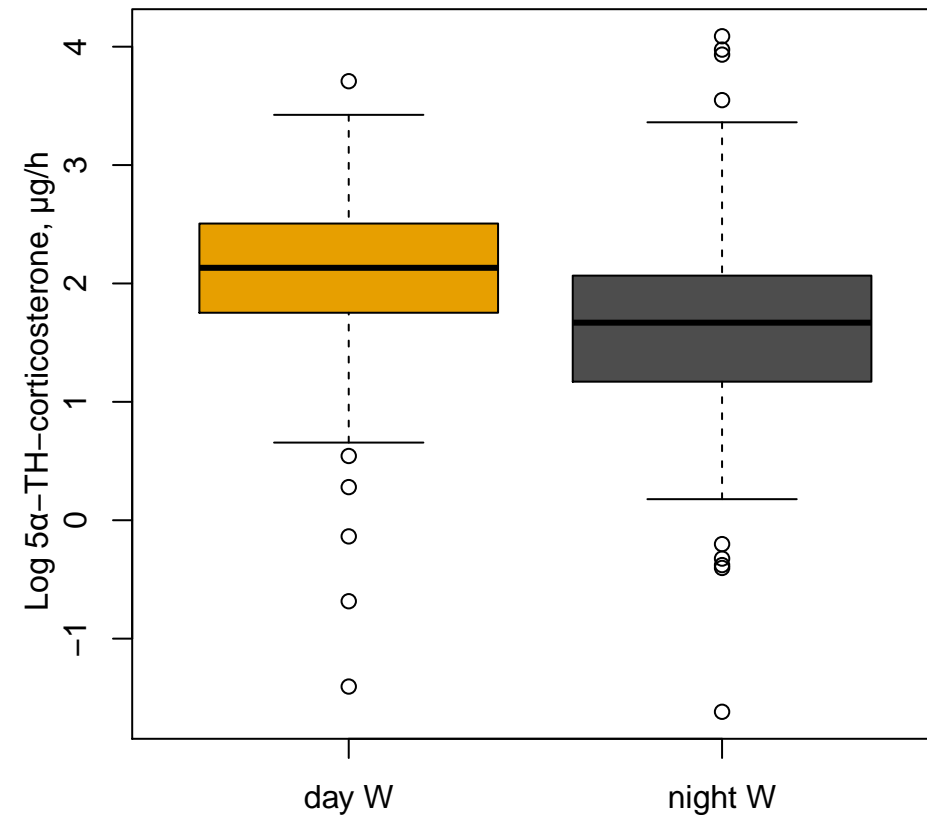

**(g) M : rho= 0.573 n= 455**

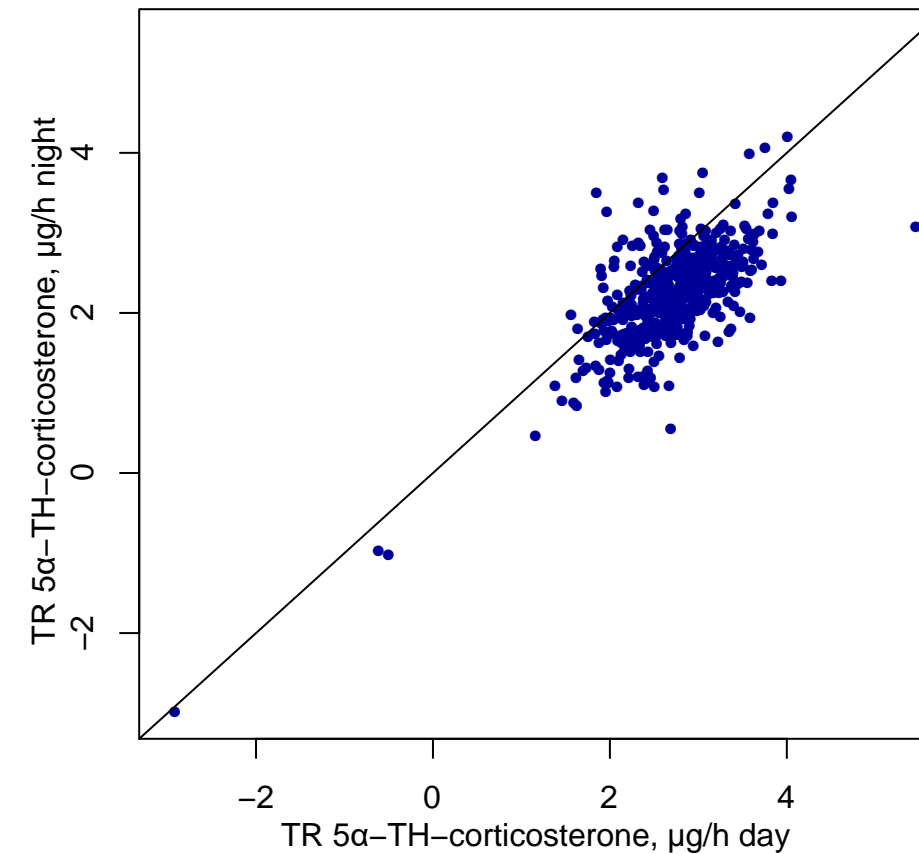

**(h) W : rho= 0.684 n= 379**

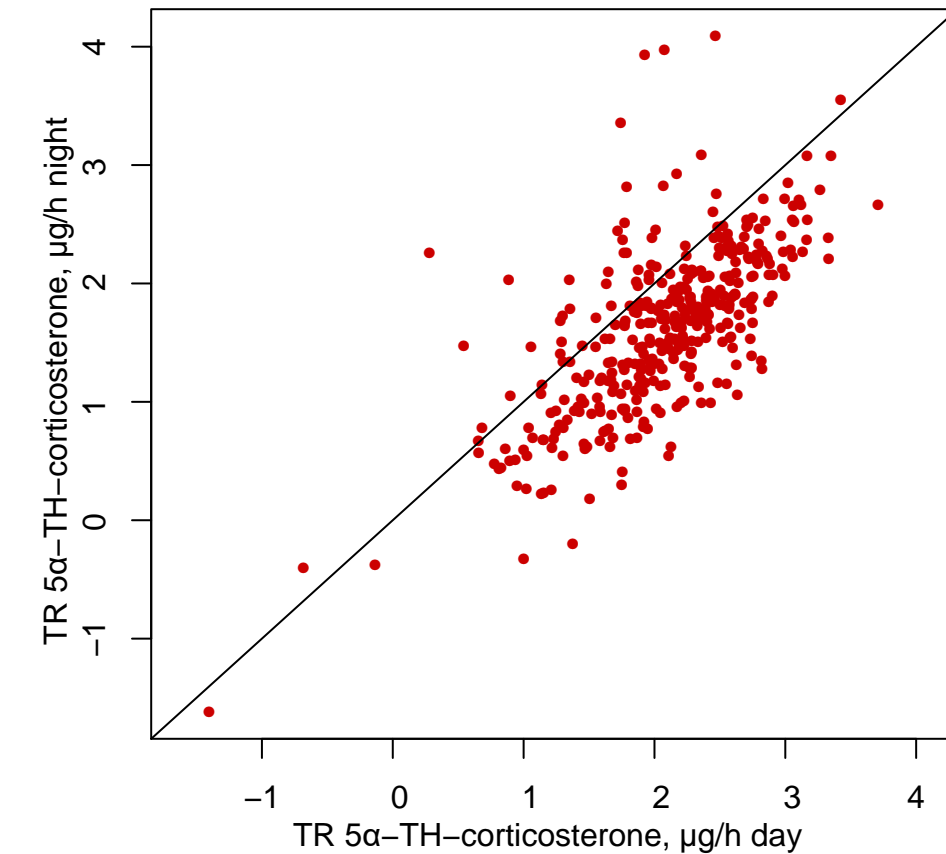

(a) M vs W:  $\delta = 0.21$   $p = 0.084$

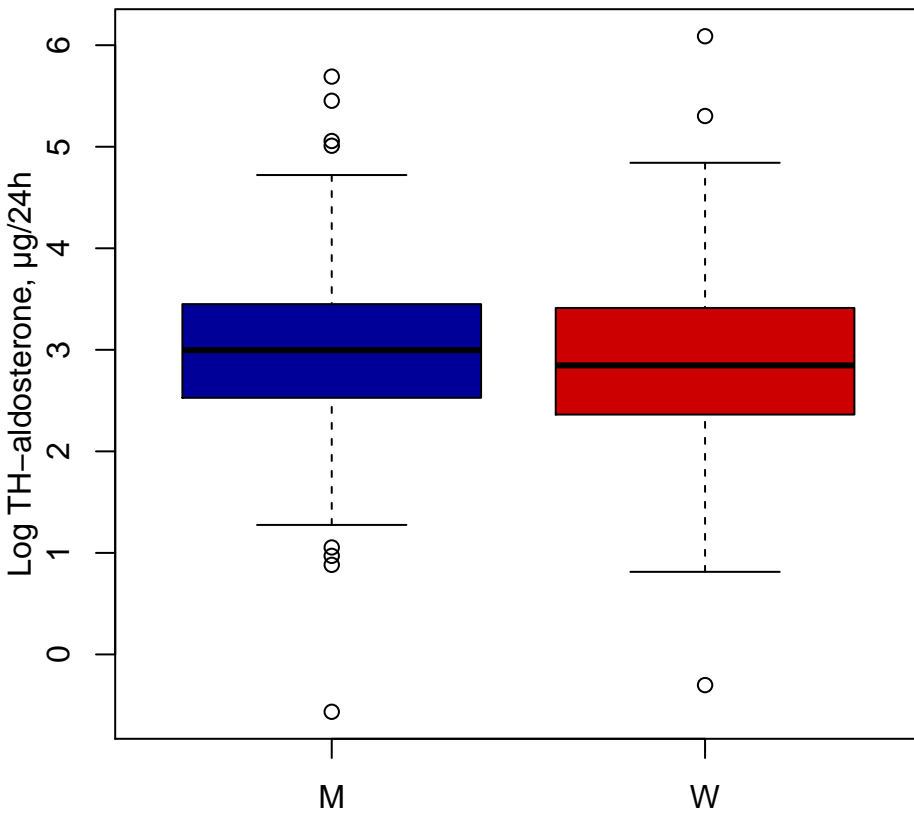

(b) M:  $p = 0.007$  W:  $p = 0$

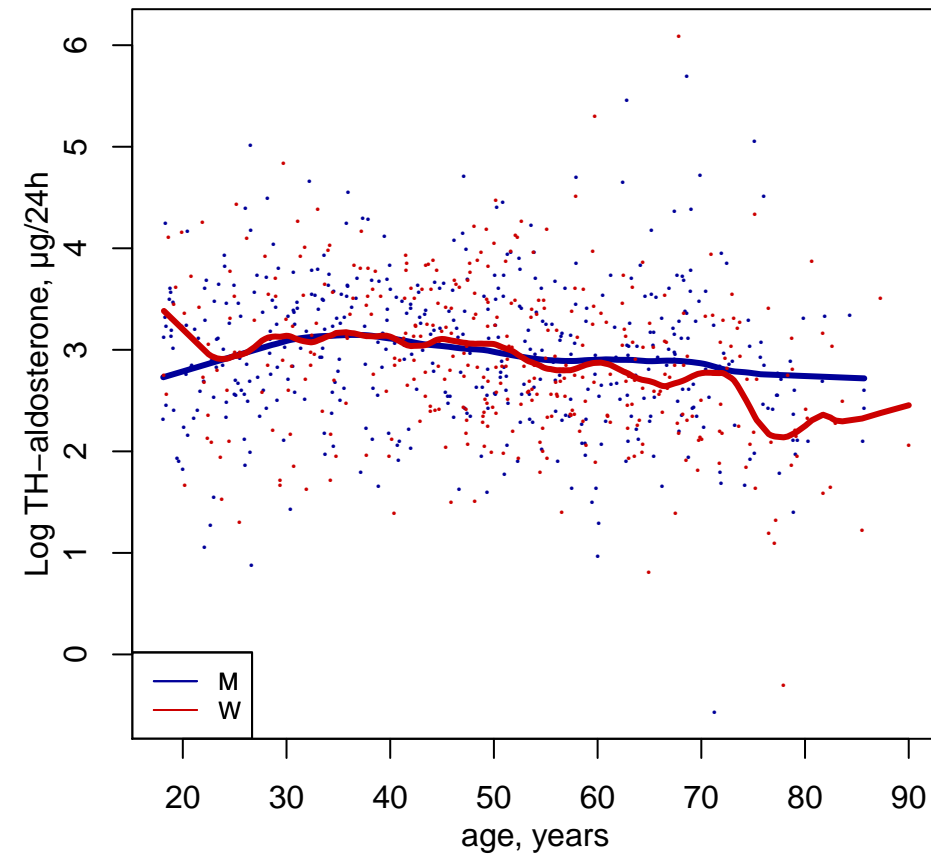

(c) TR= 0 nout= 2 sk= 0.09 ku= 0.32

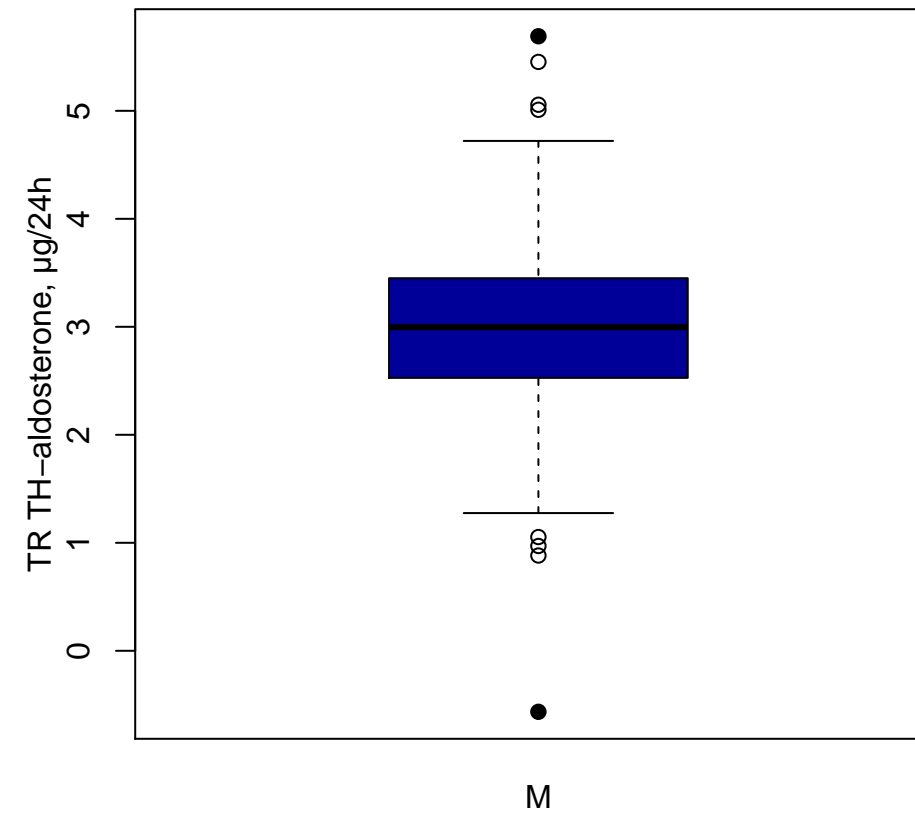

(d) TR= 0 nout= 2 sk= 0.05 ku= 0.32

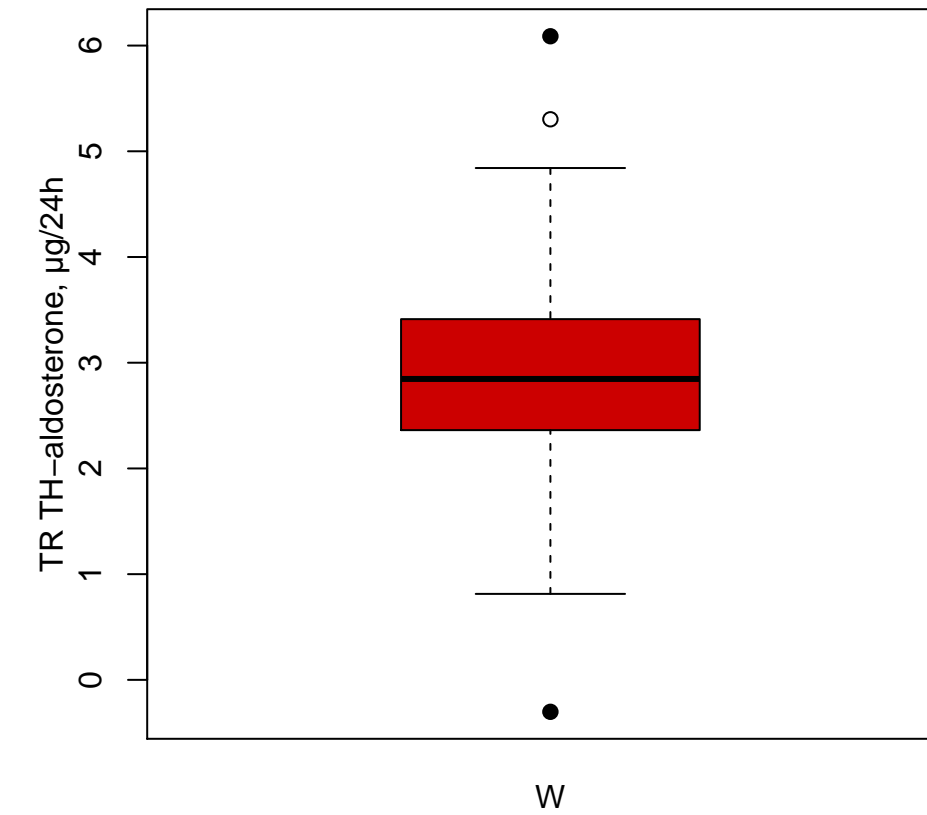

(e) D vs N:  $\delta = 0.29$   $p = 0$

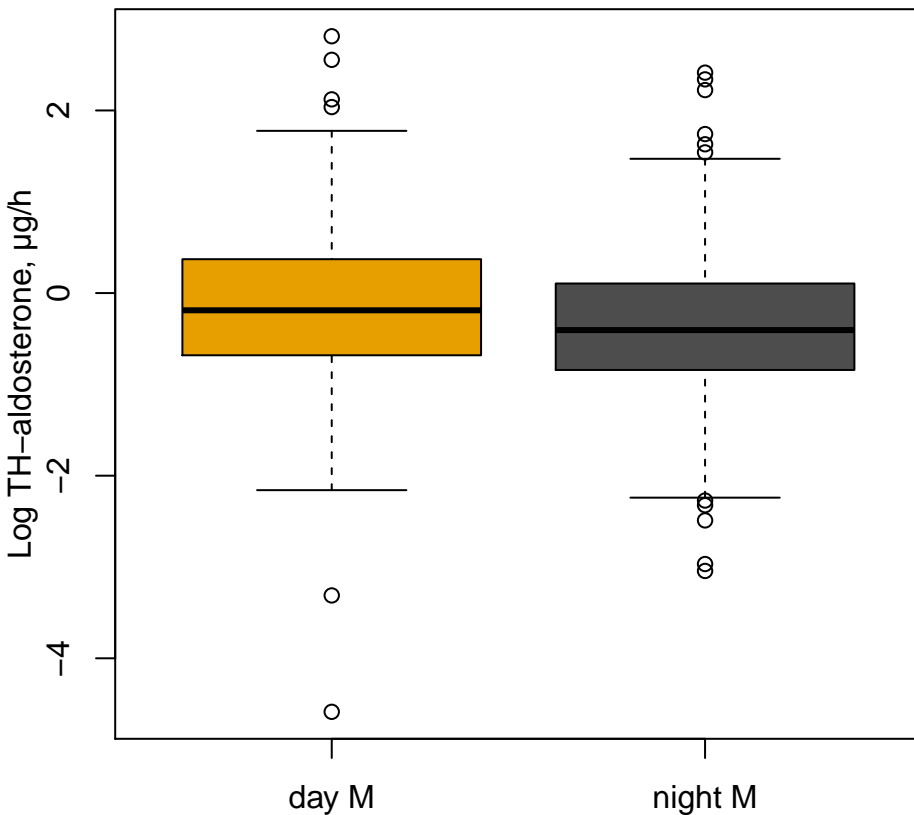

(f) D vs N:  $\delta = 0.25$   $p = 0$

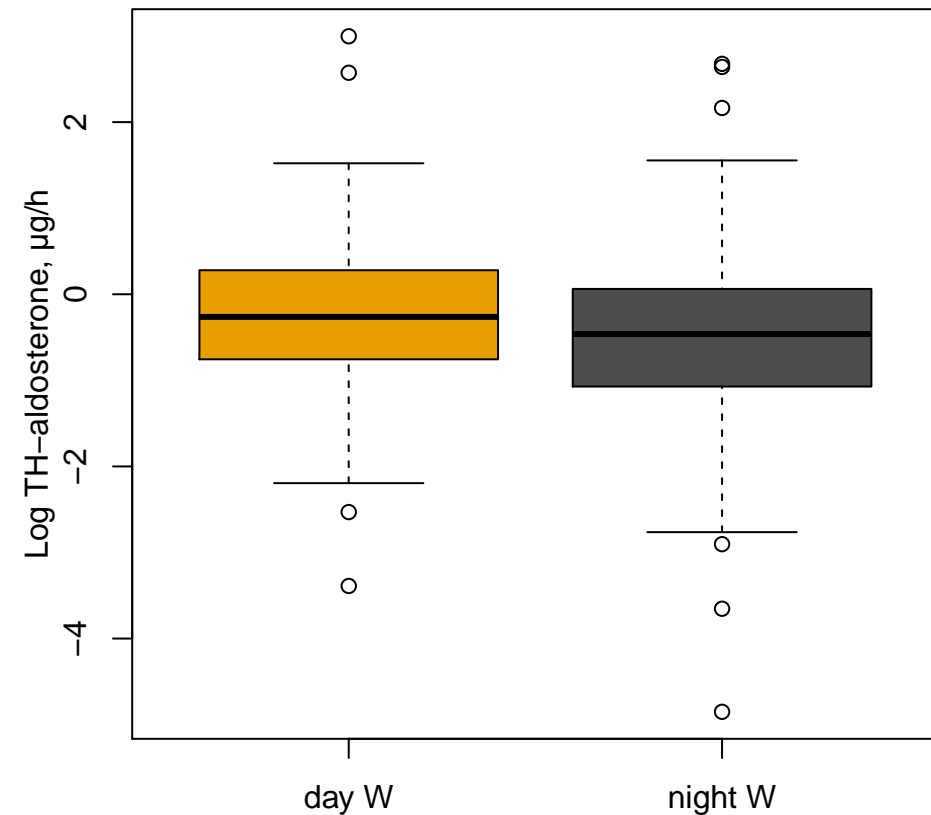

(g) M :  $\rho = 0.691$   $n = 454$

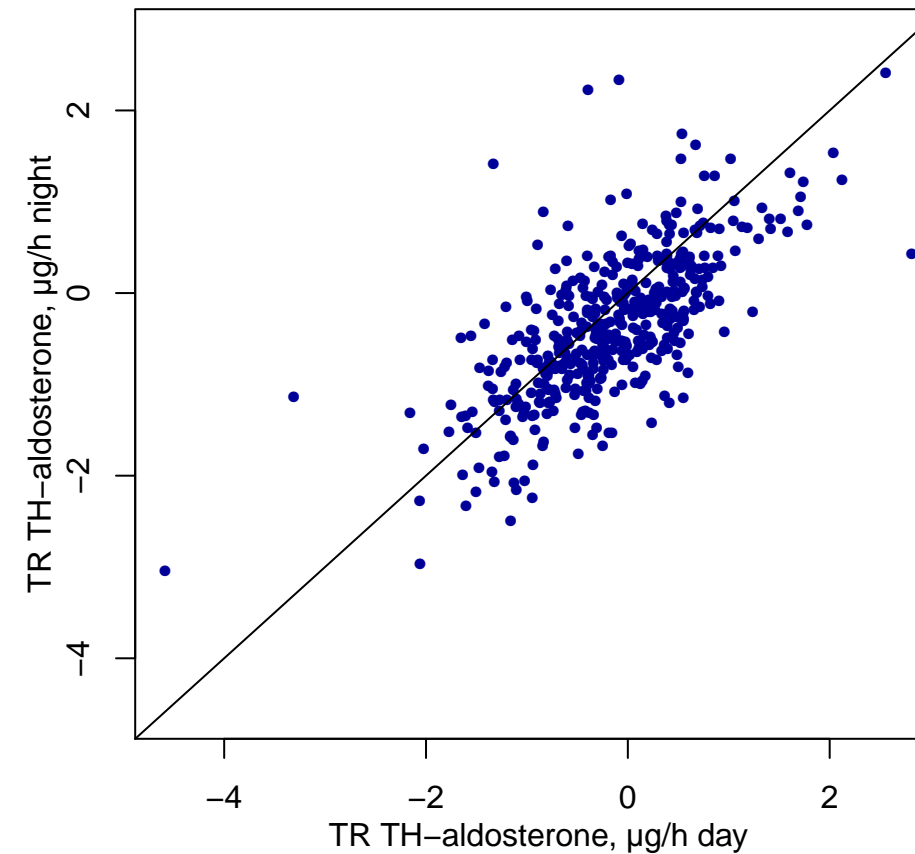

(h) W :  $\rho = 0.739$   $n = 378$

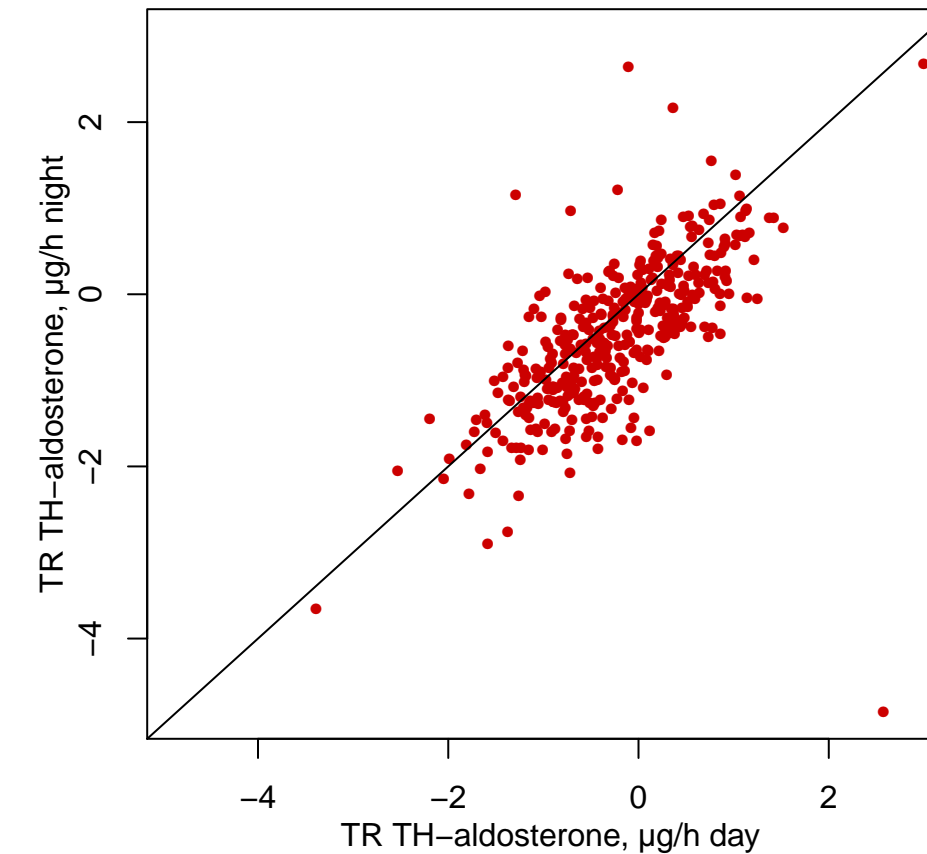



(a) M vs W:  $\delta = 0.58$   $p = 0$

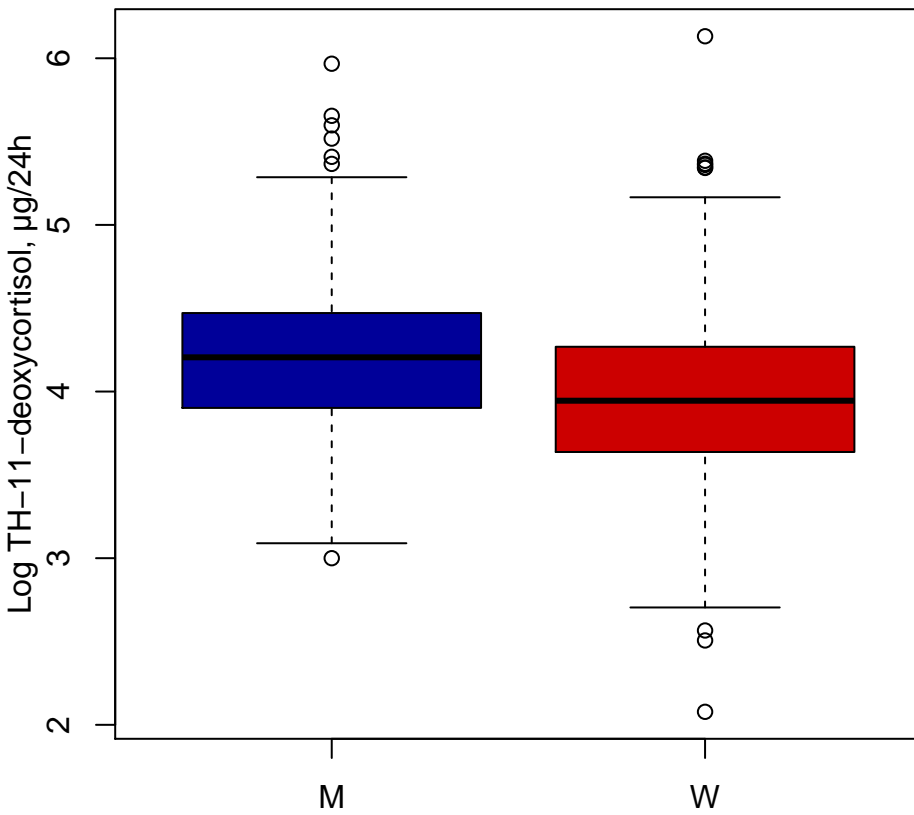

(b) M:  $p = 0$  W:  $p = 0$

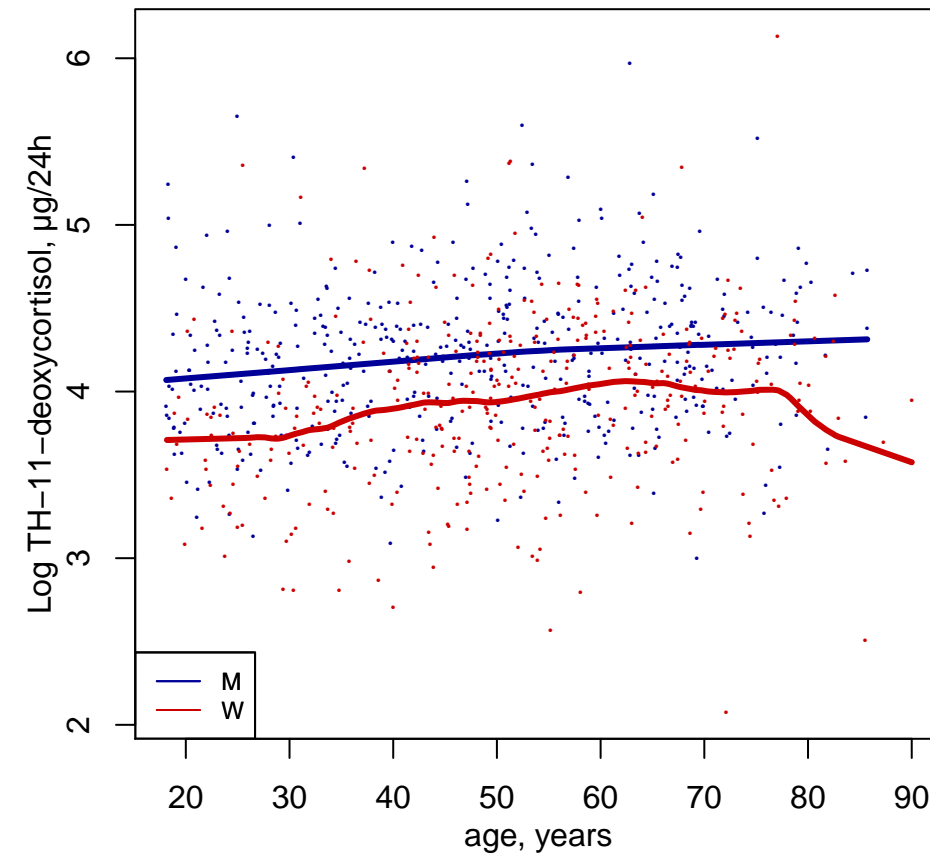

(c)  $TR = -0.2$   $n_{out} = 0$   $sk = 0.03$   $ku = 0.22$

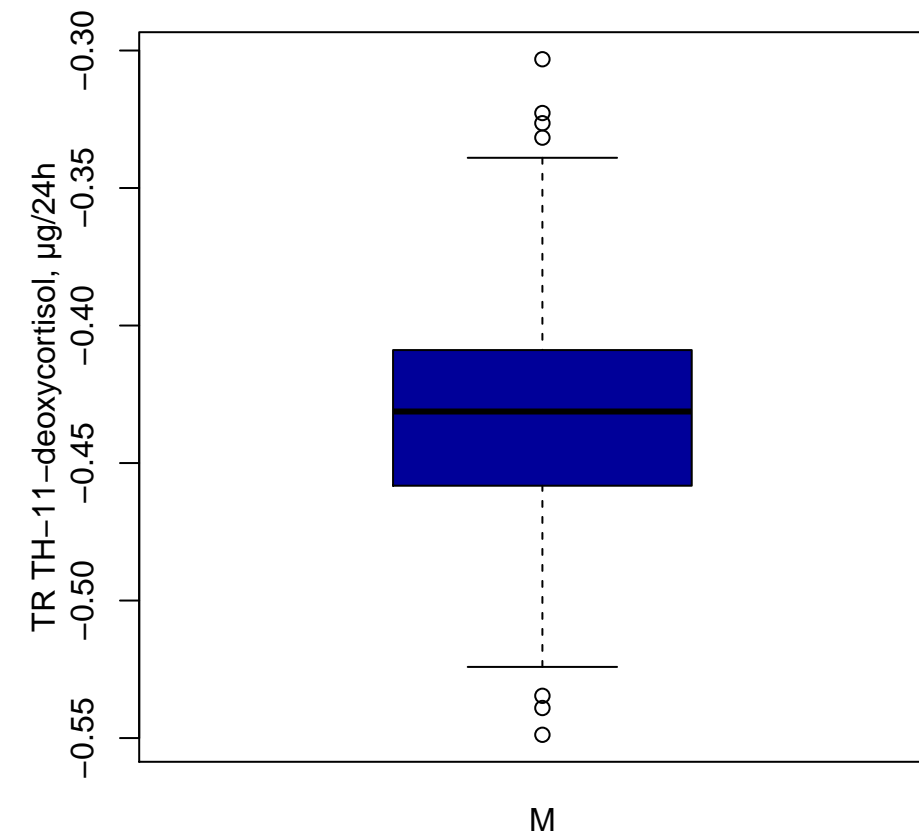

(d)  $TR = 0$   $n_{out} = 2$   $sk = 0$   $ku = 0.22$

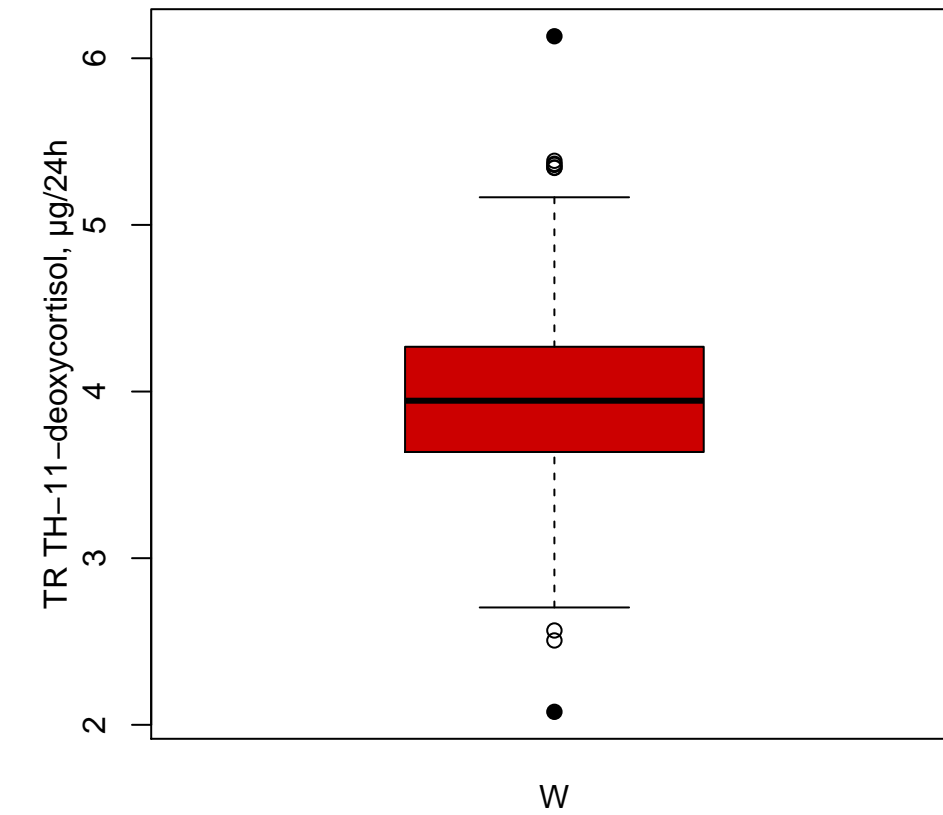

(e) D vs N:  $\delta = 0.55$   $p = 0$

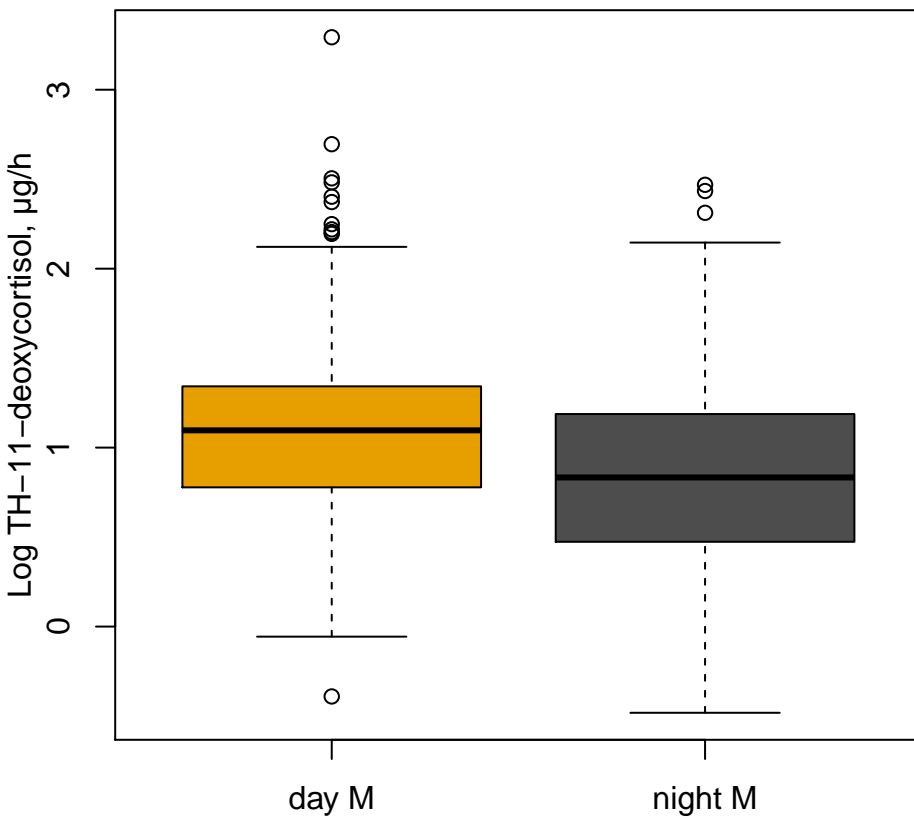

(f) D vs N:  $\delta = 0.5$   $p = 0$

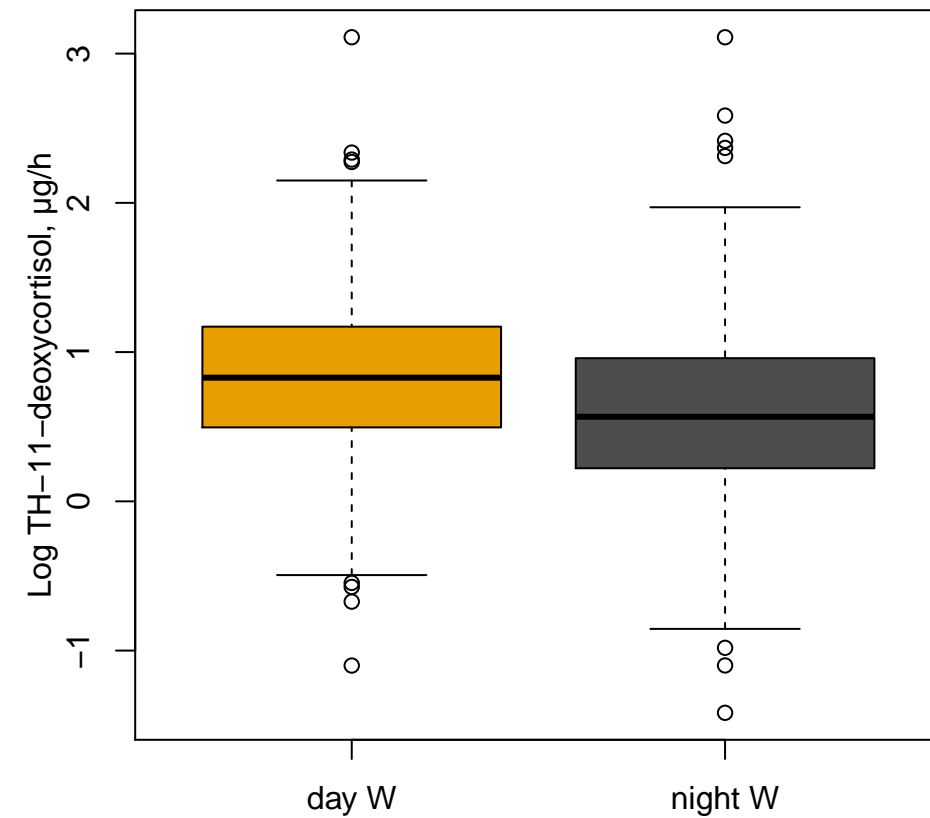

(g) M :  $\rho = 0.614$   $n = 455$

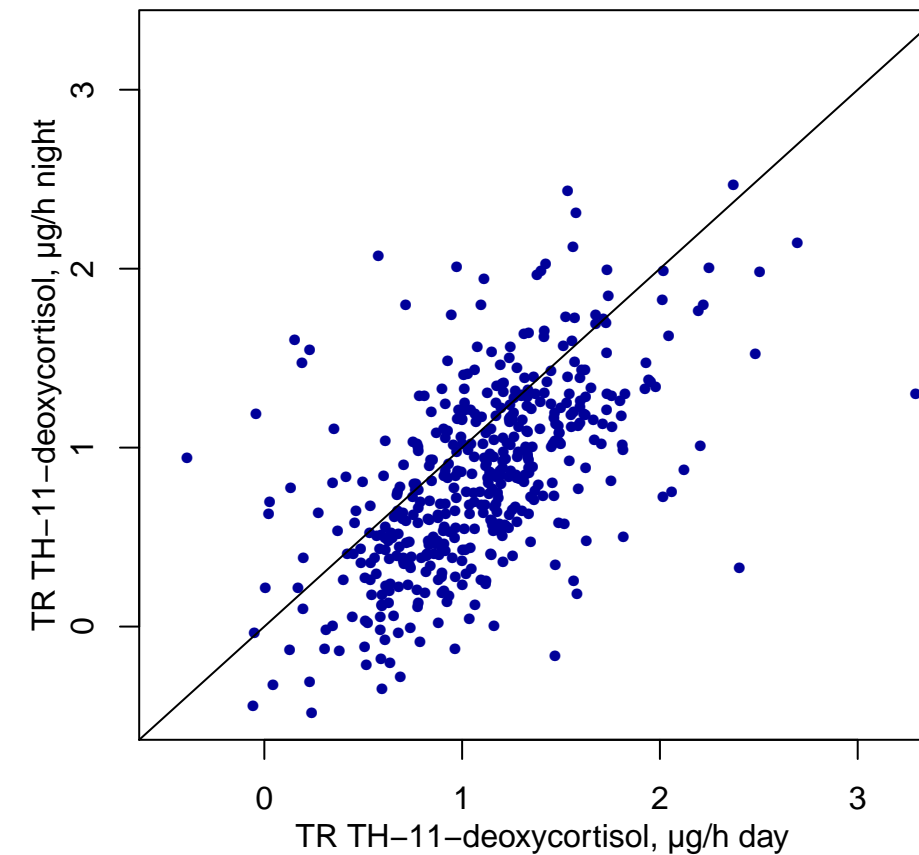

(h) W :  $\rho = 0.661$   $n = 379$

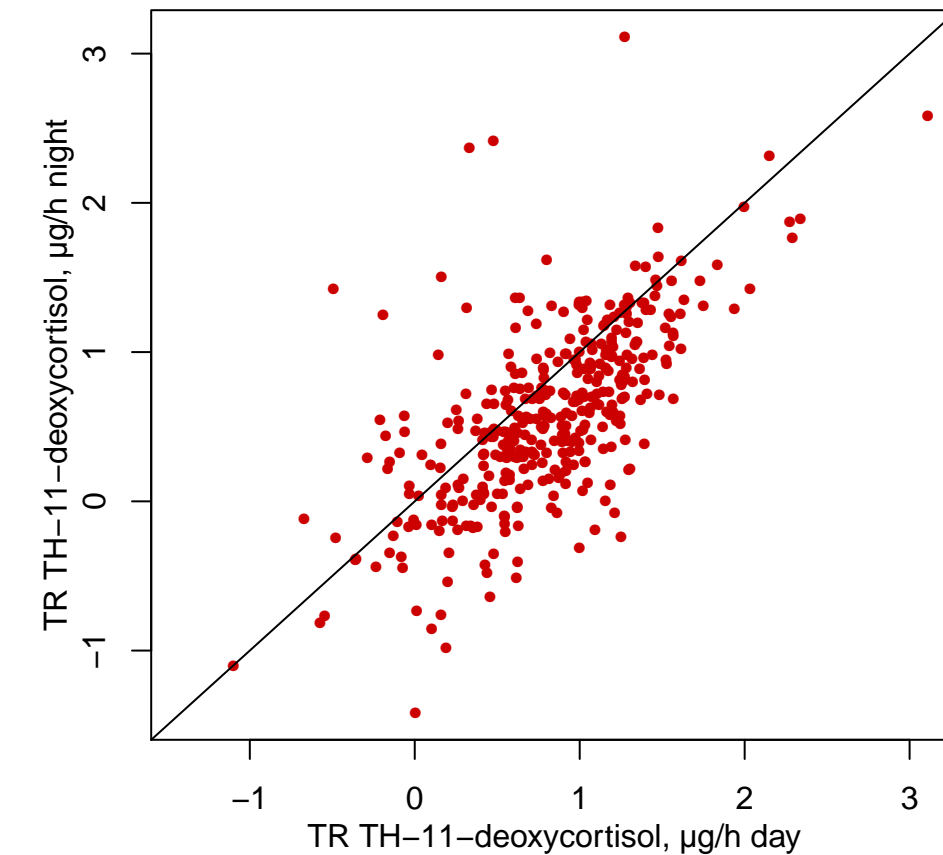

(a) M vs W:  $\delta = 0.54$   $p = 0$

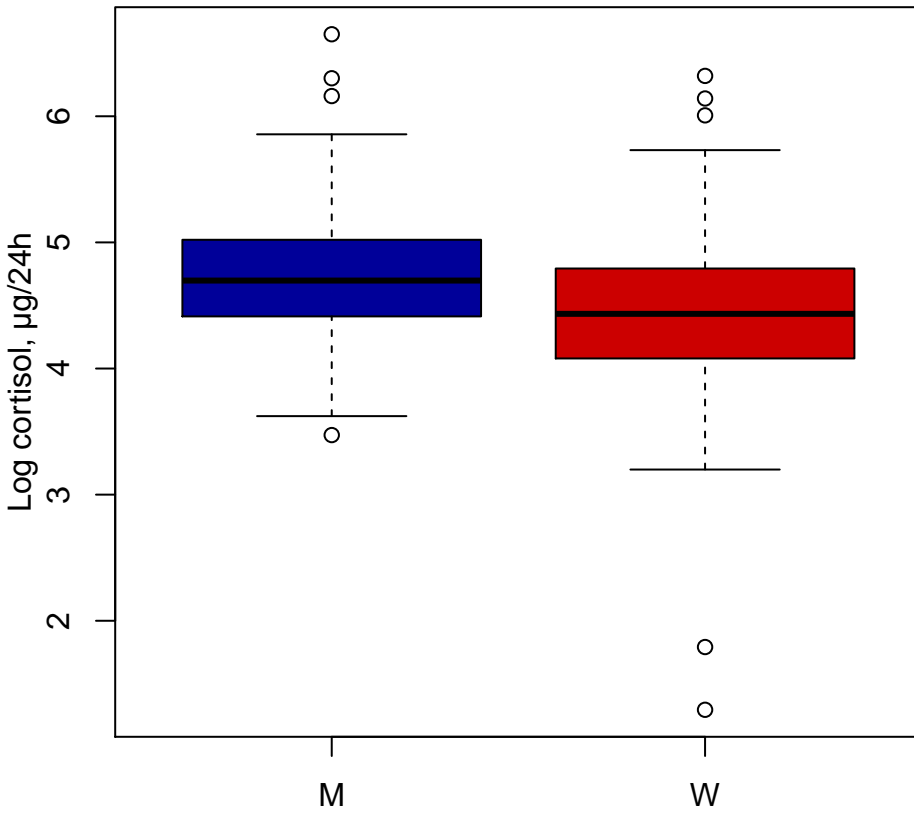

(b) M:  $p = 0.159$  W:  $p = 0.67$

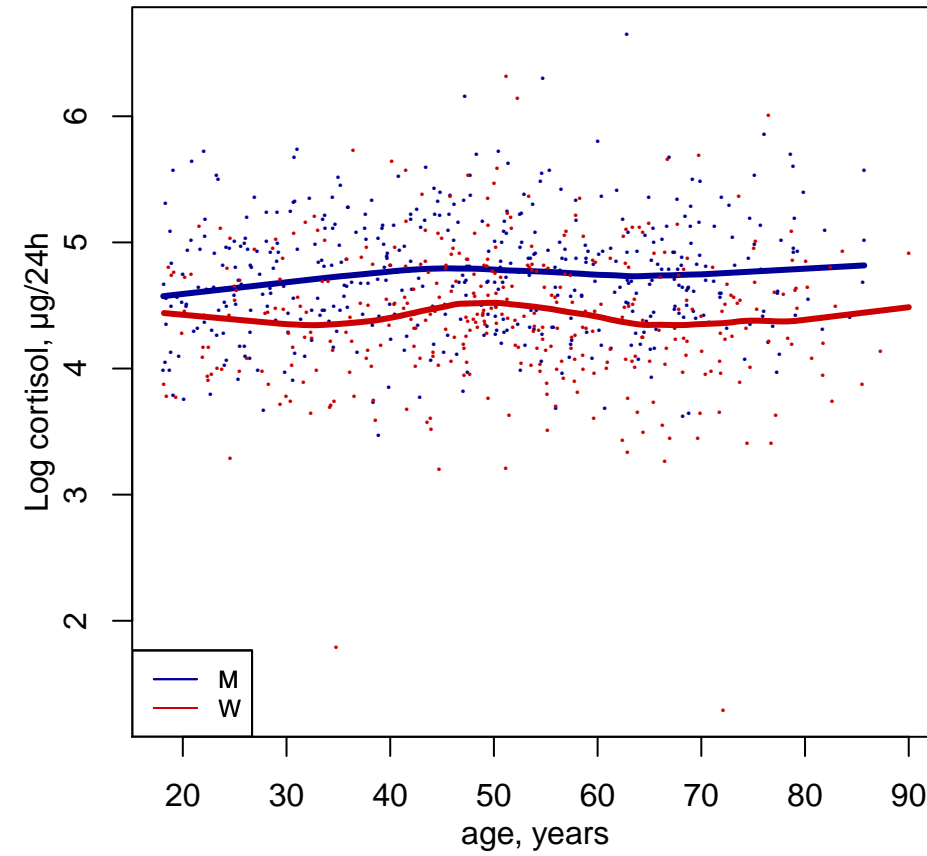

(c)  $\text{TR} = -0.1$   $\text{nout} = 1$   $\text{sk} = 0.02$   $\text{ku} = -0.1$

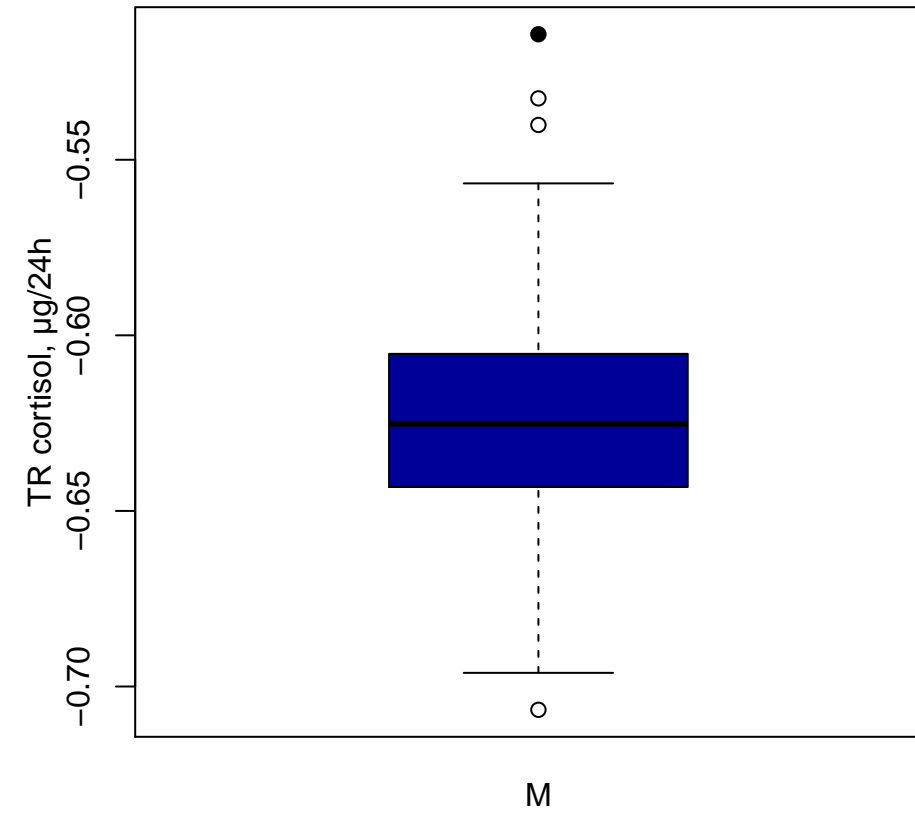

(d)  $\text{TR} = -0.2$   $\text{nout} = 2$   $\text{sk} = -0.07$   $\text{ku} = -0.1$

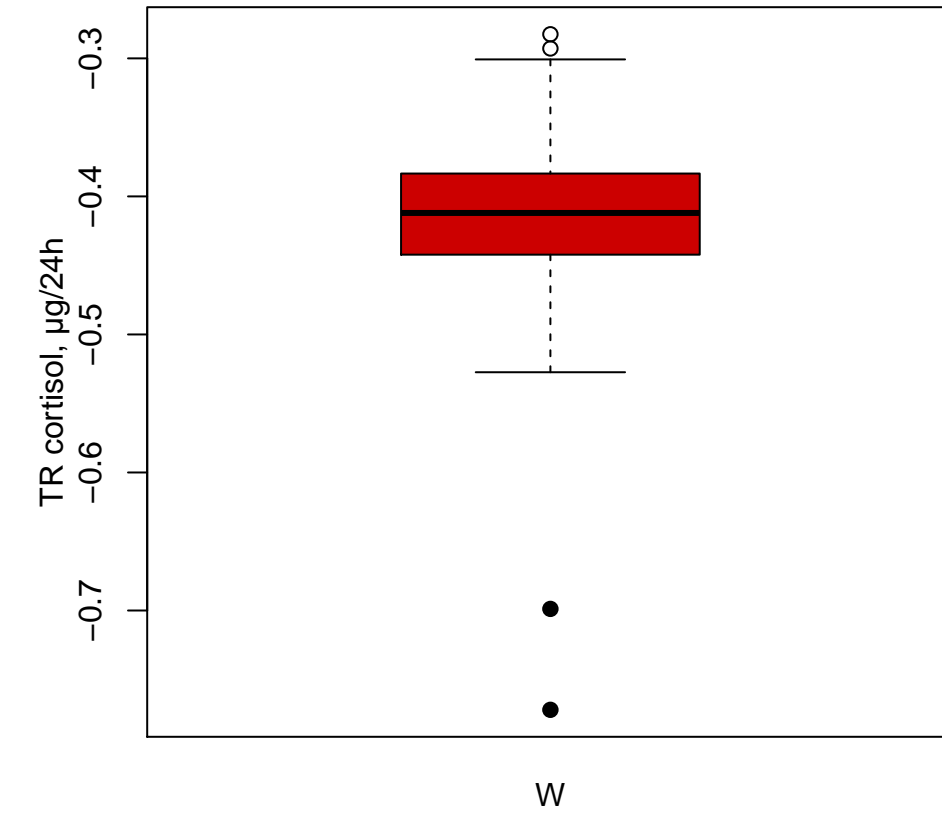

(e) D vs N:  $\delta = 0.51$   $p = 0$

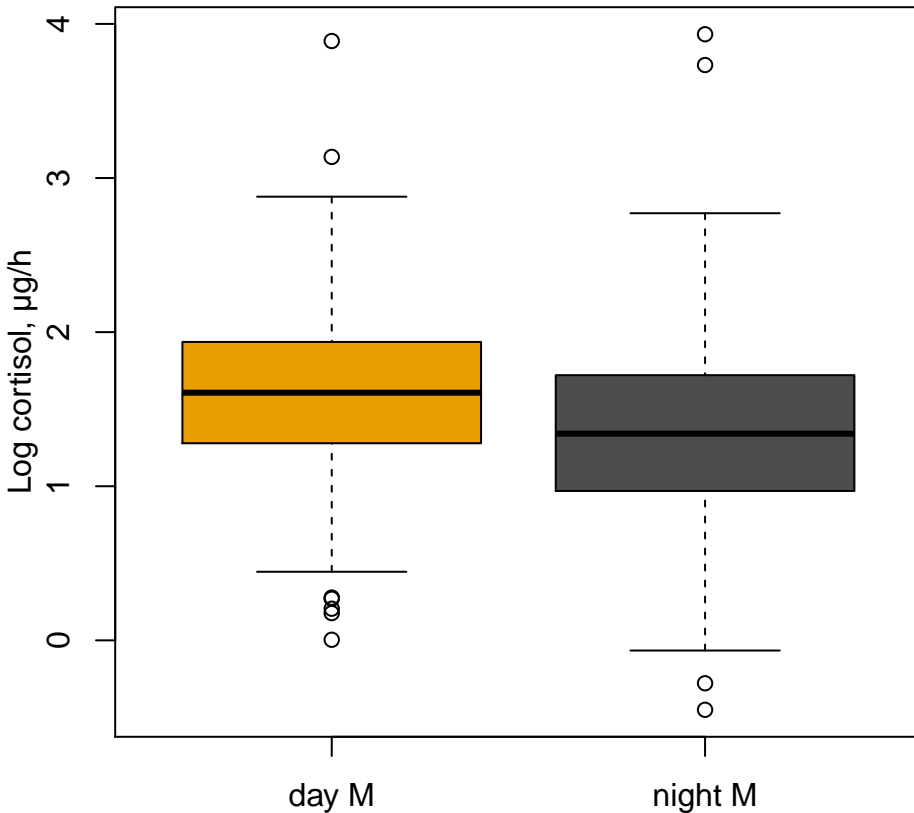

(f) D vs N:  $\delta = 0.53$   $p = 0$

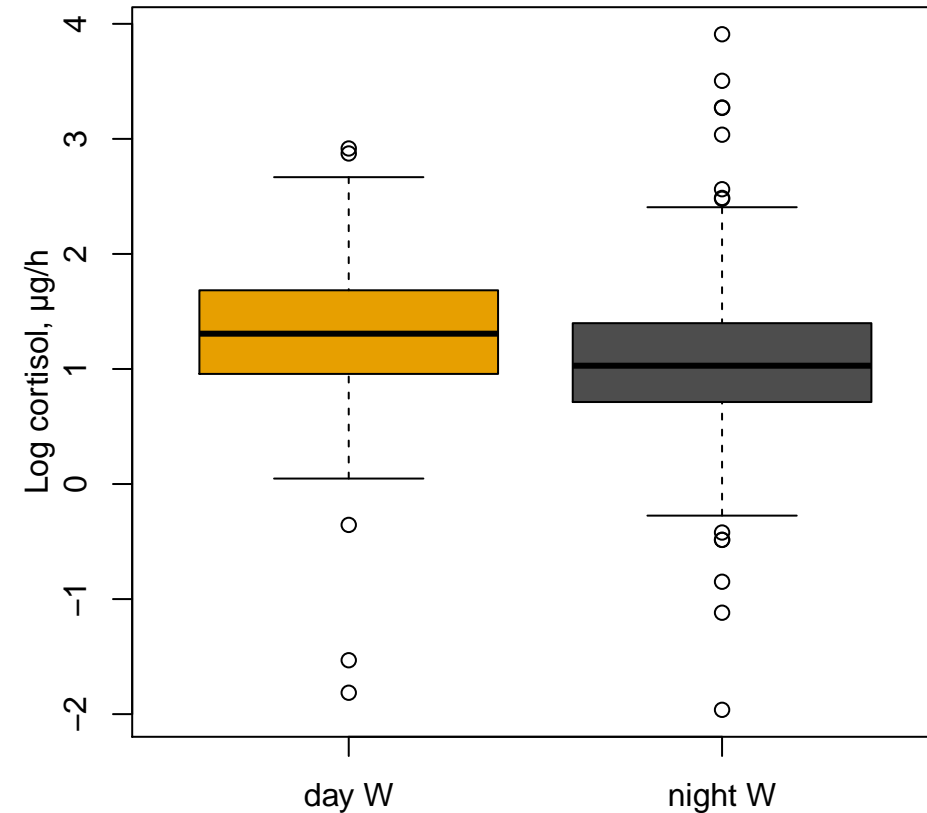

(g) M :  $\rho = 0.563$   $n = 455$

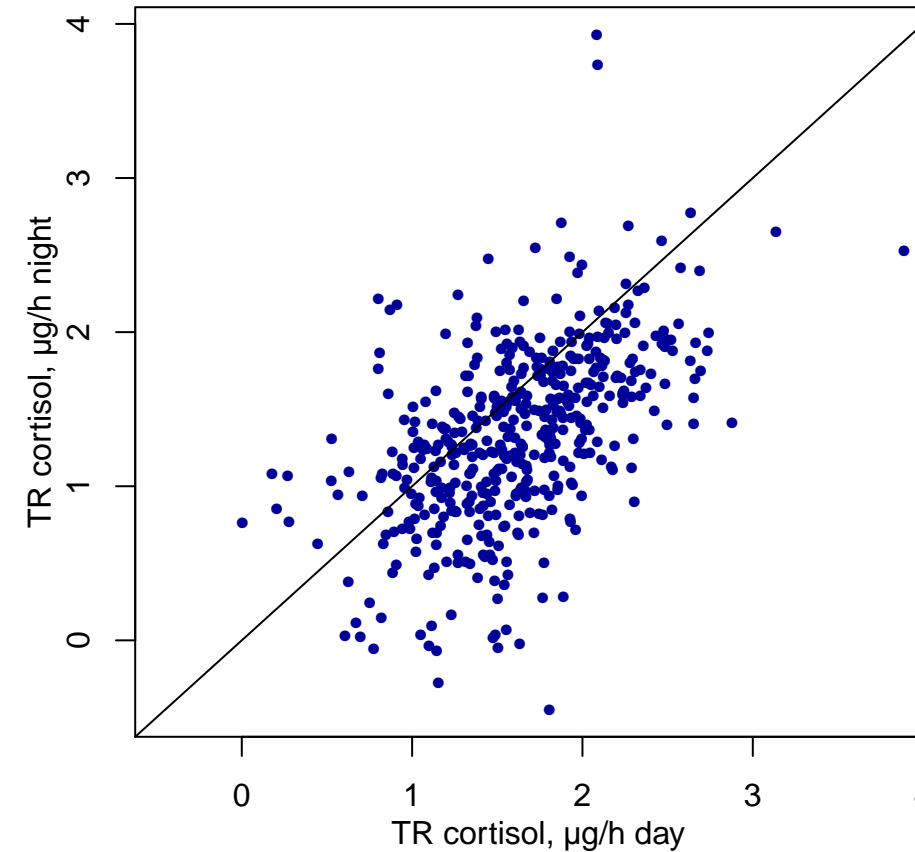

(h) W :  $\rho = 0.516$   $n = 379$

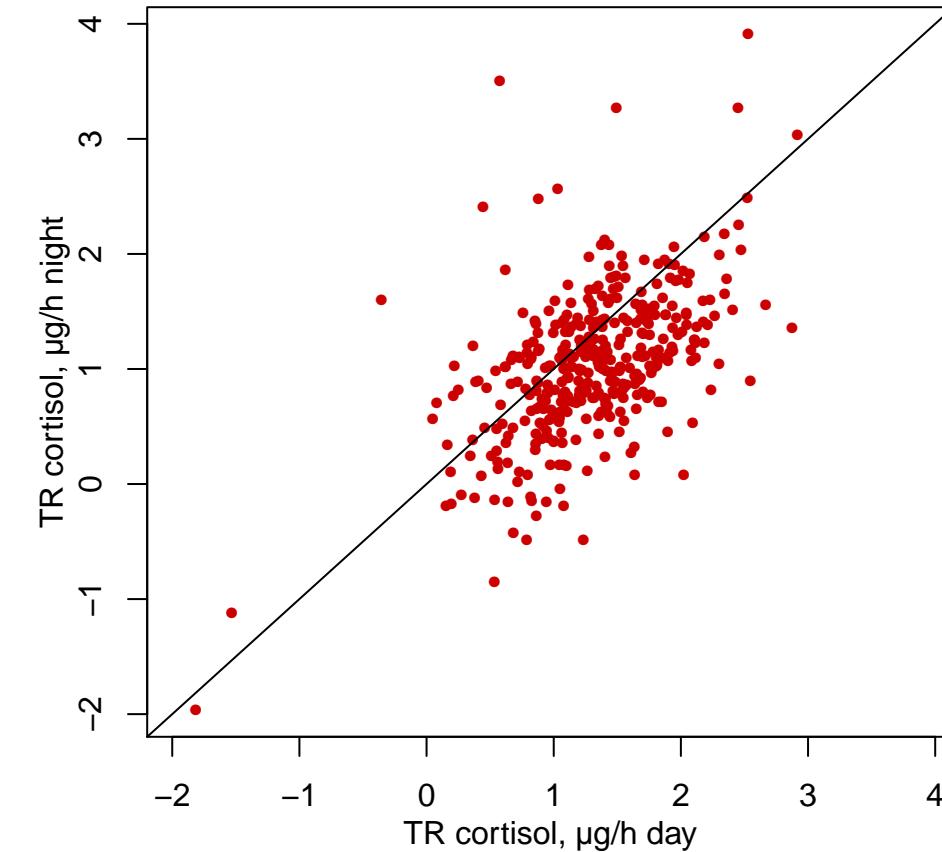

(a) M vs W: delta= 0.28 p = 0

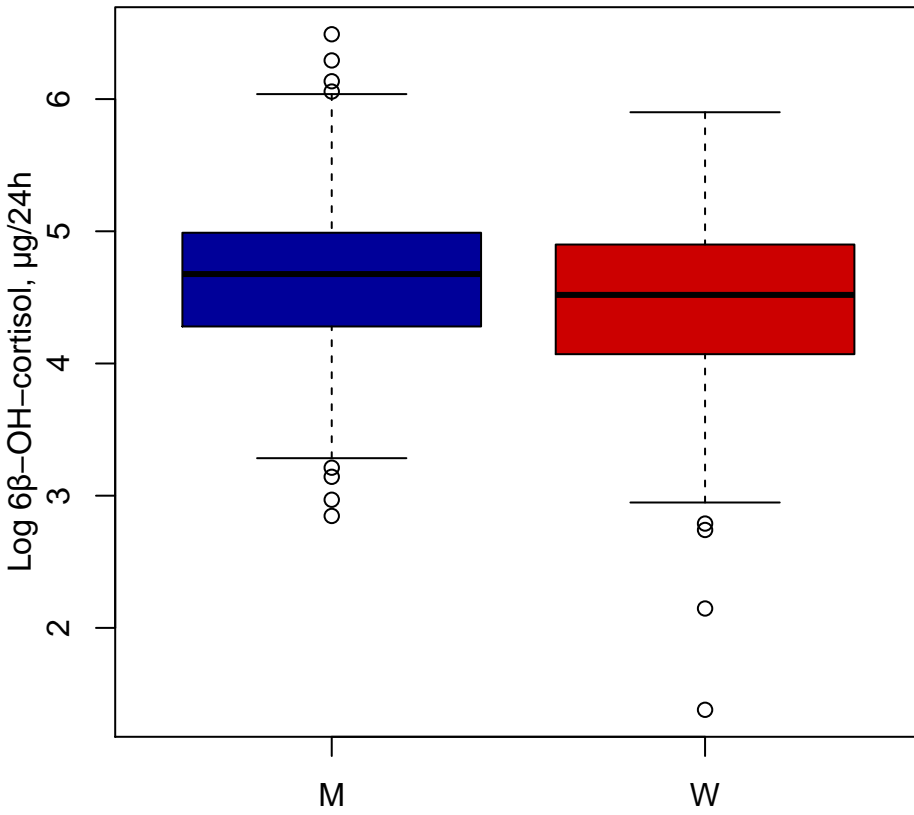

(b) M: p = 0.468 W: p = 0.16

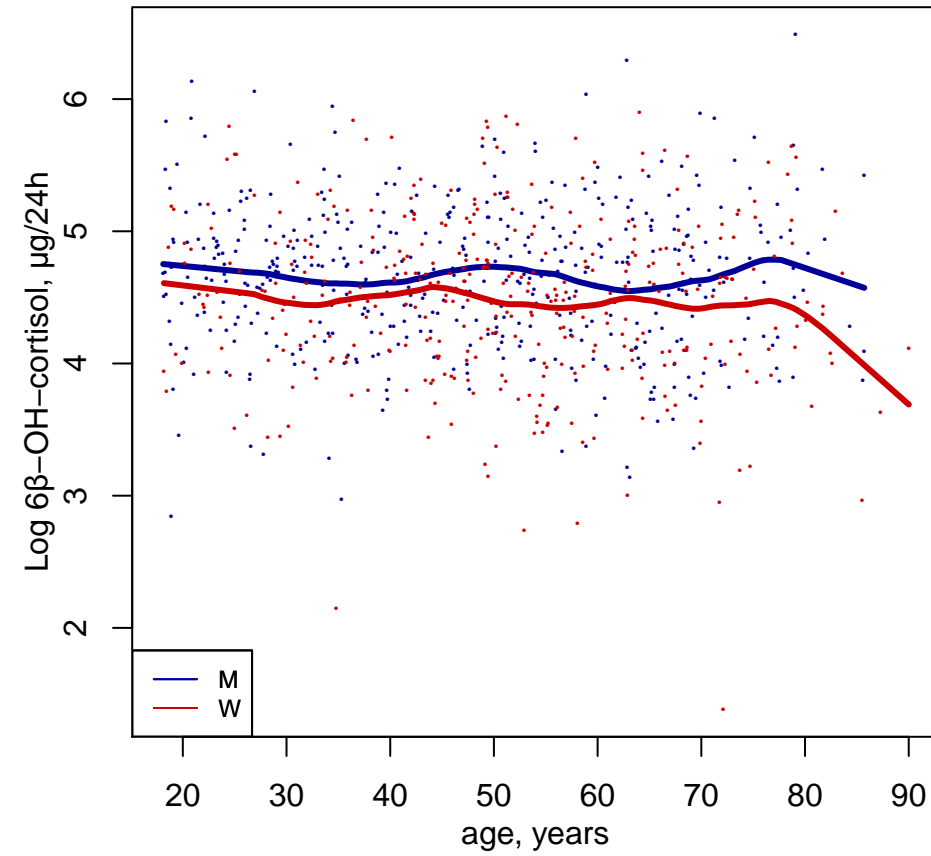

(c) TR= 0 nout= 0 sk= -0.05 ku= 0.42

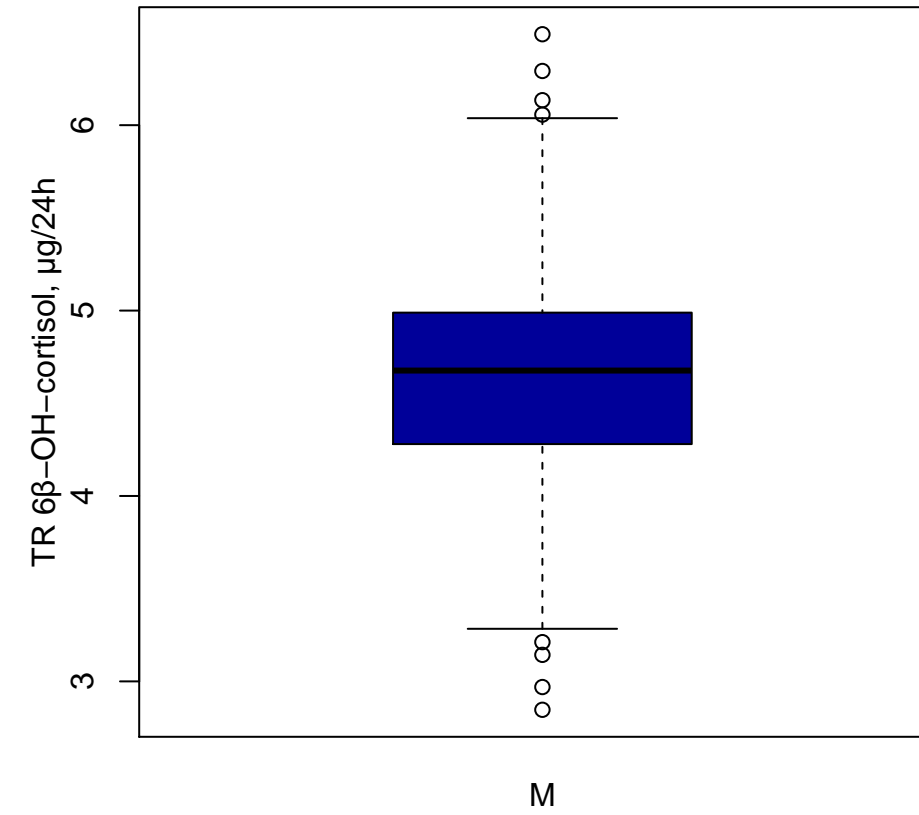

(d) TR= 0.1 nout= 1 sk= 0 ku= 0.42

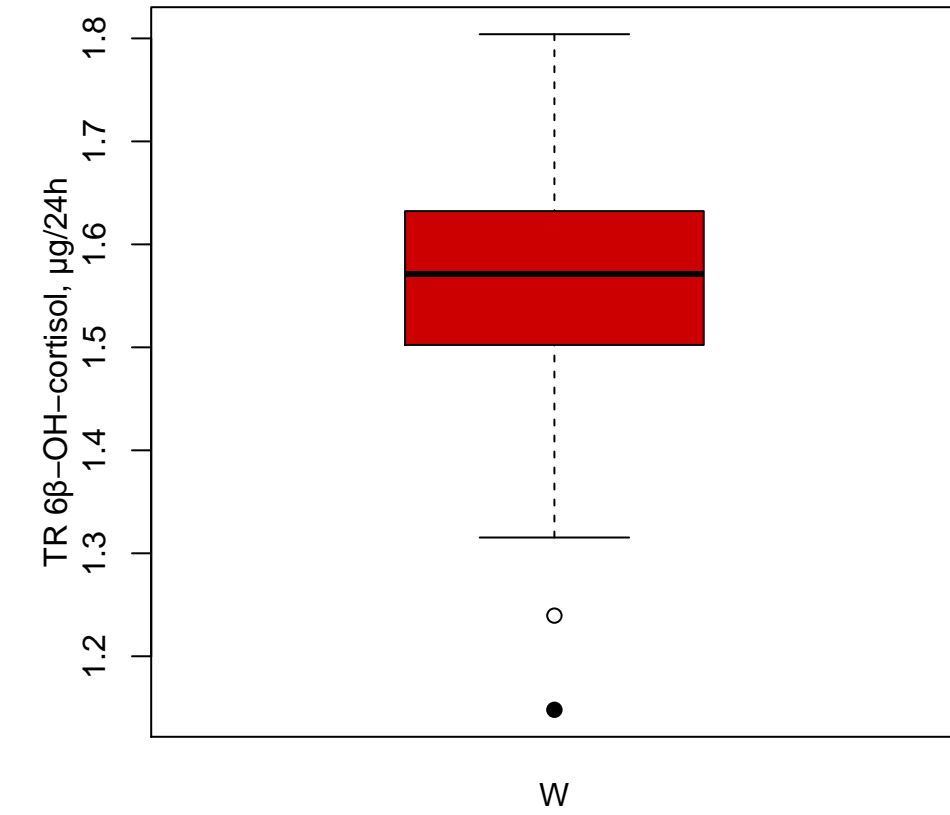

(e) D vs N: delta= 0.5 p = 0

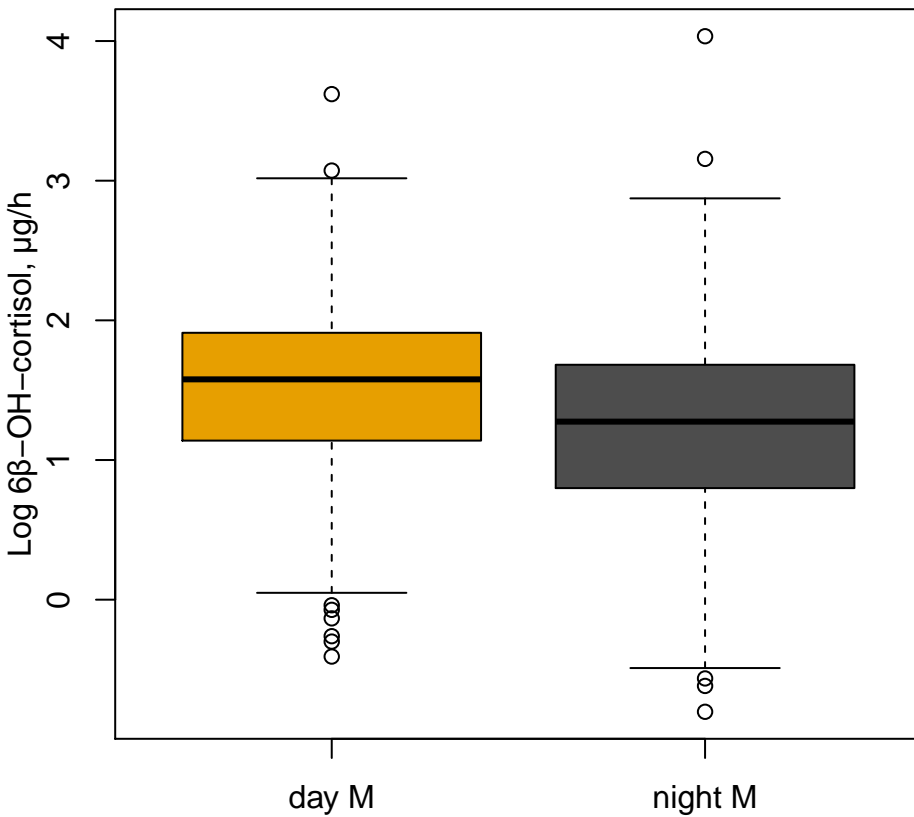

(f) D vs N: delta= 0.54 p = 0

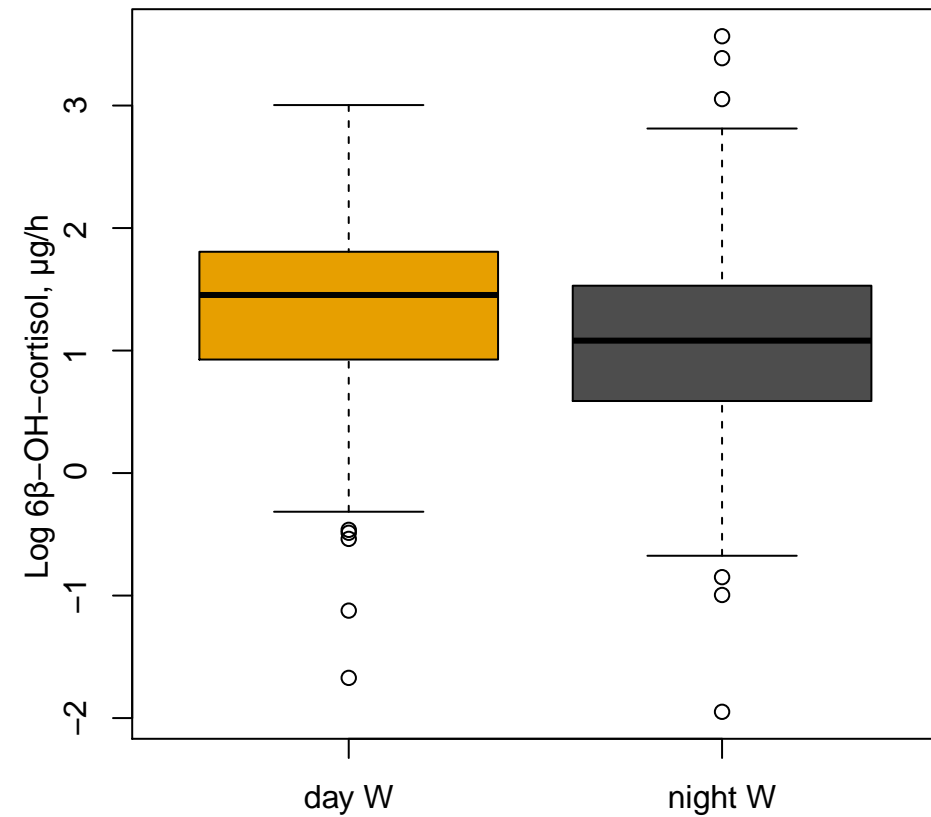

(g) M : rho= 0.457 n= 455

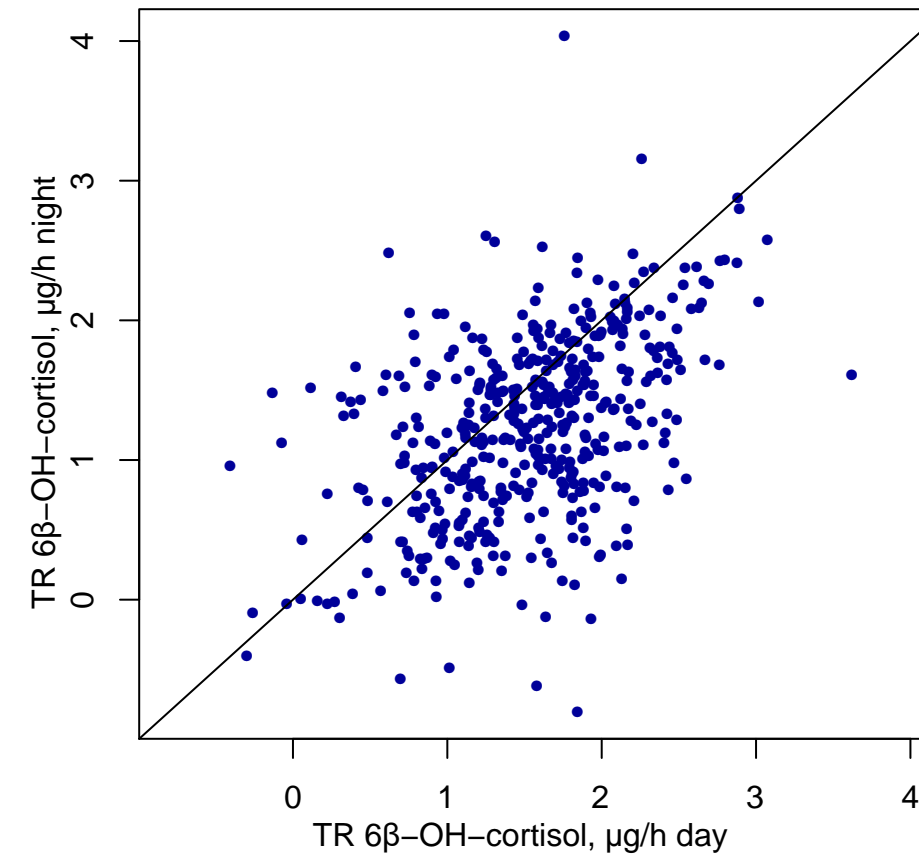

(h) W : rho= 0.581 n= 378

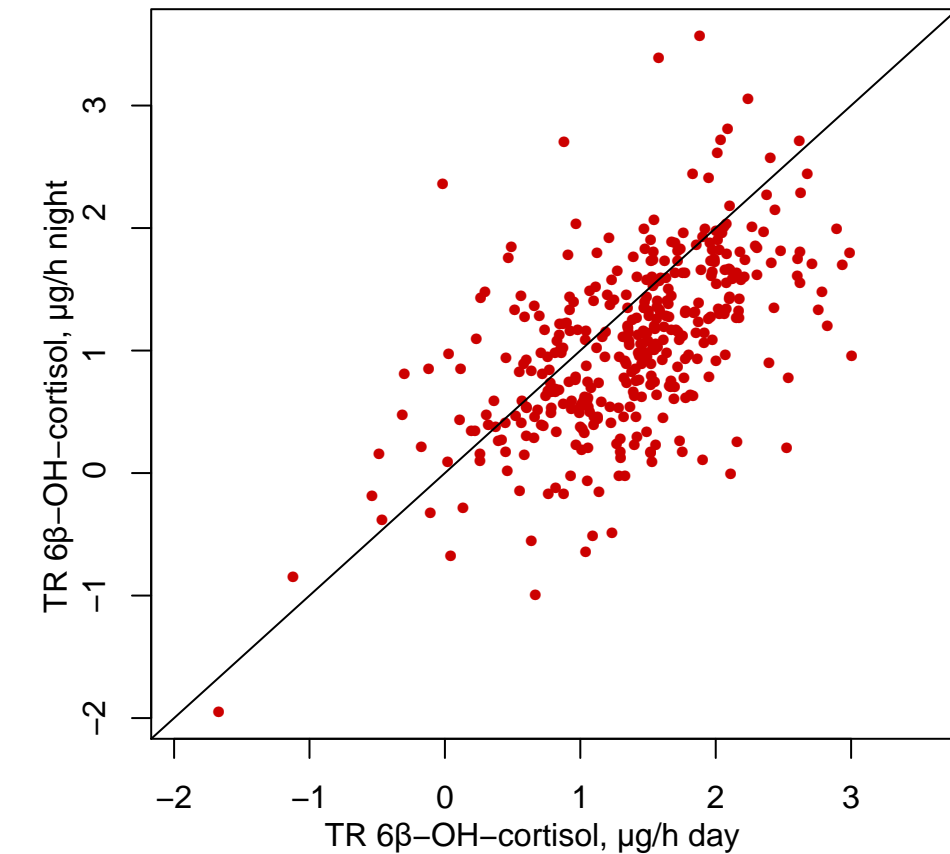

(a) M vs W: delta= 0.07 p = 0.155

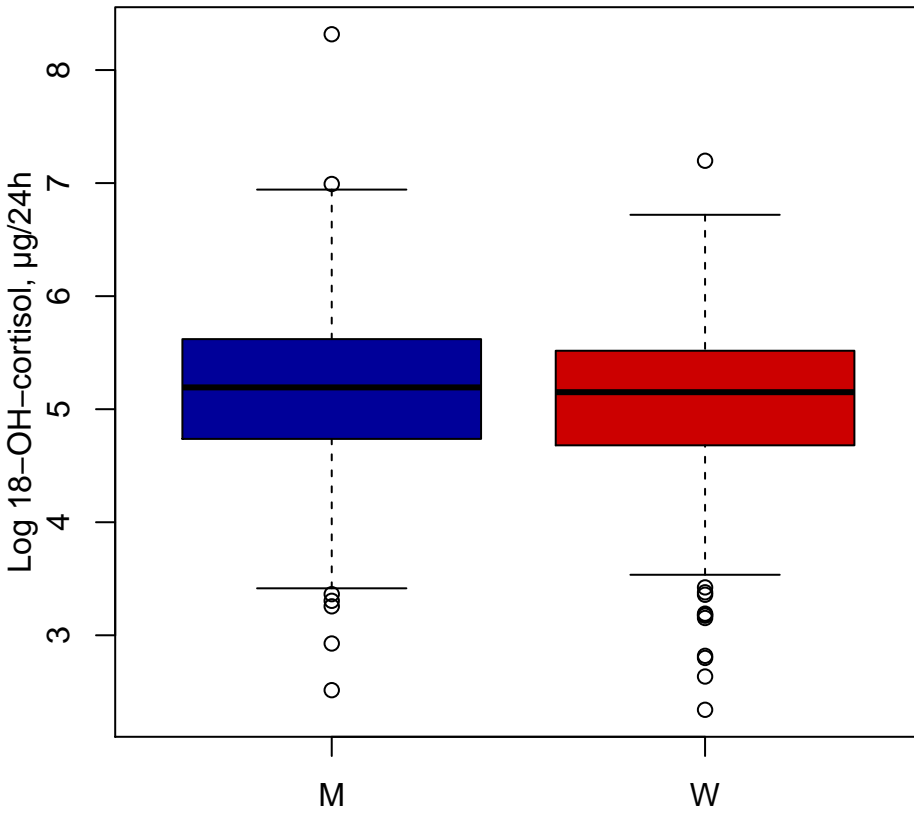

(b) M: p = 0.176 W: p = 0.373

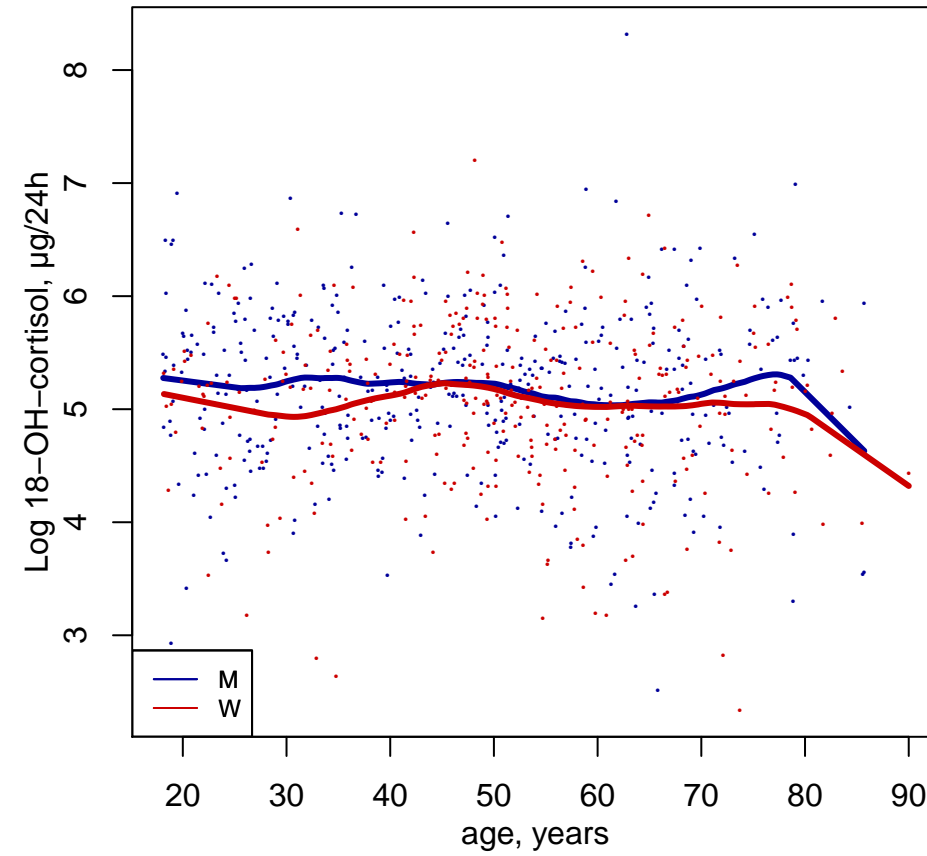

(c) TR= 0.1 nout= 1 sk= -0.03 ku= 0.33

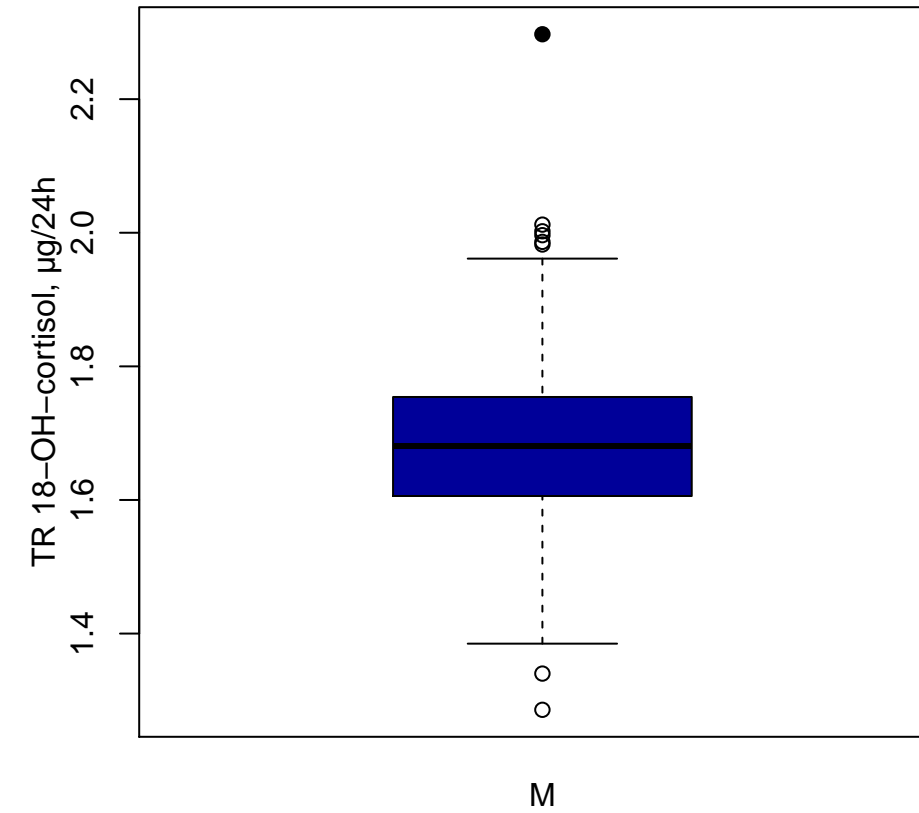

(d) TR= 0.3 nout= 1 sk= 0.01 ku= 0.33

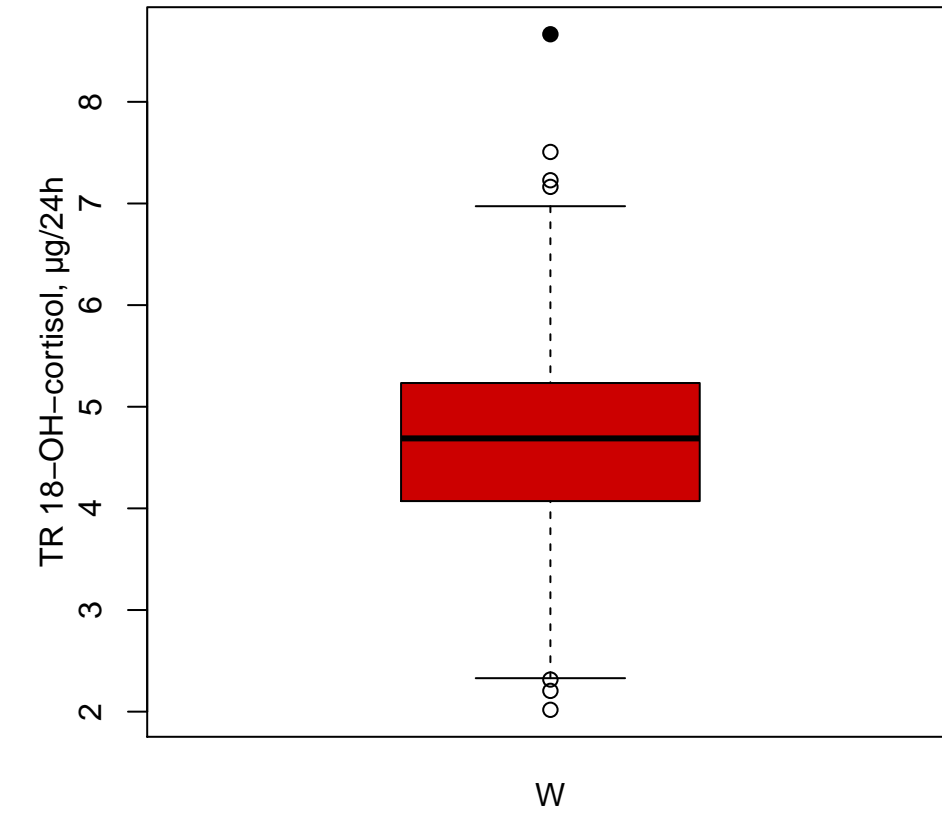

(e) D vs N: delta= 0.72 p = 0

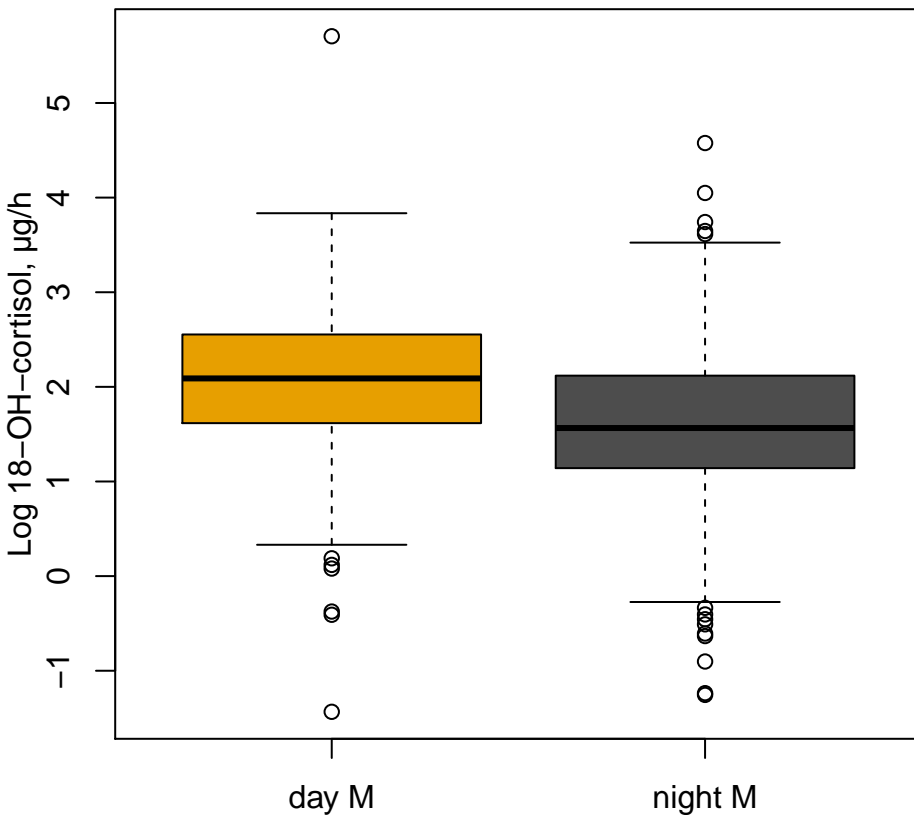

(f) D vs N: delta= 0.63 p = 0

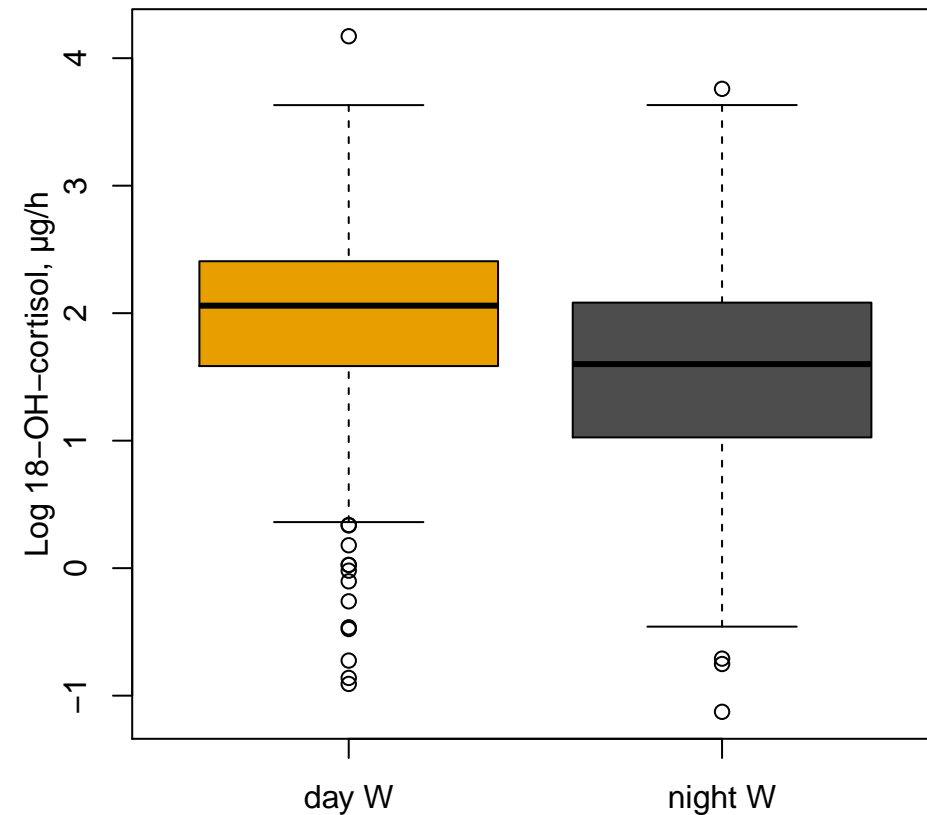

(g) M : rho= 0.551 n= 422

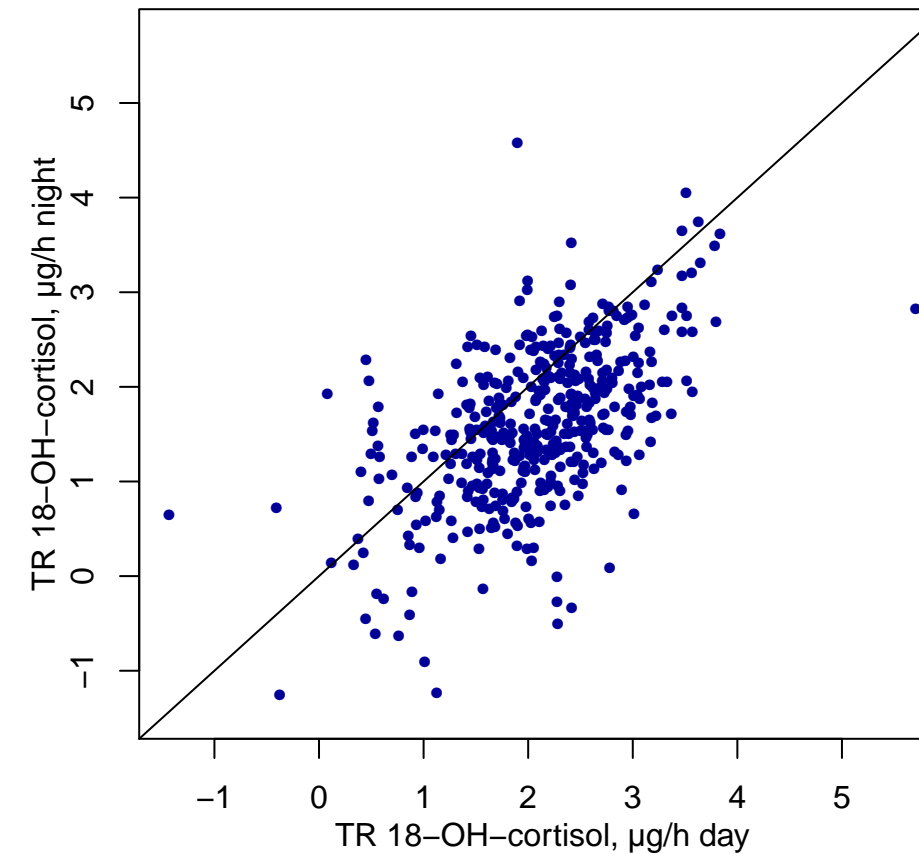

(h) W : rho= 0.625 n= 344

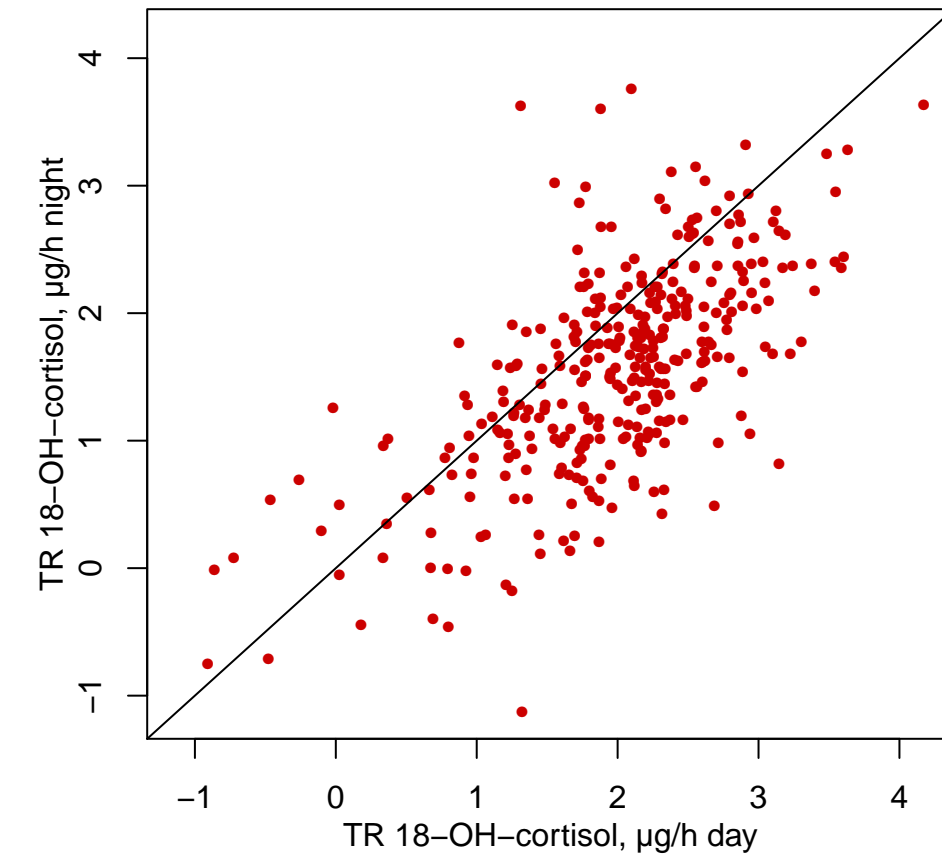

(a) M vs W:  $\delta = 0.38$   $p = 0$

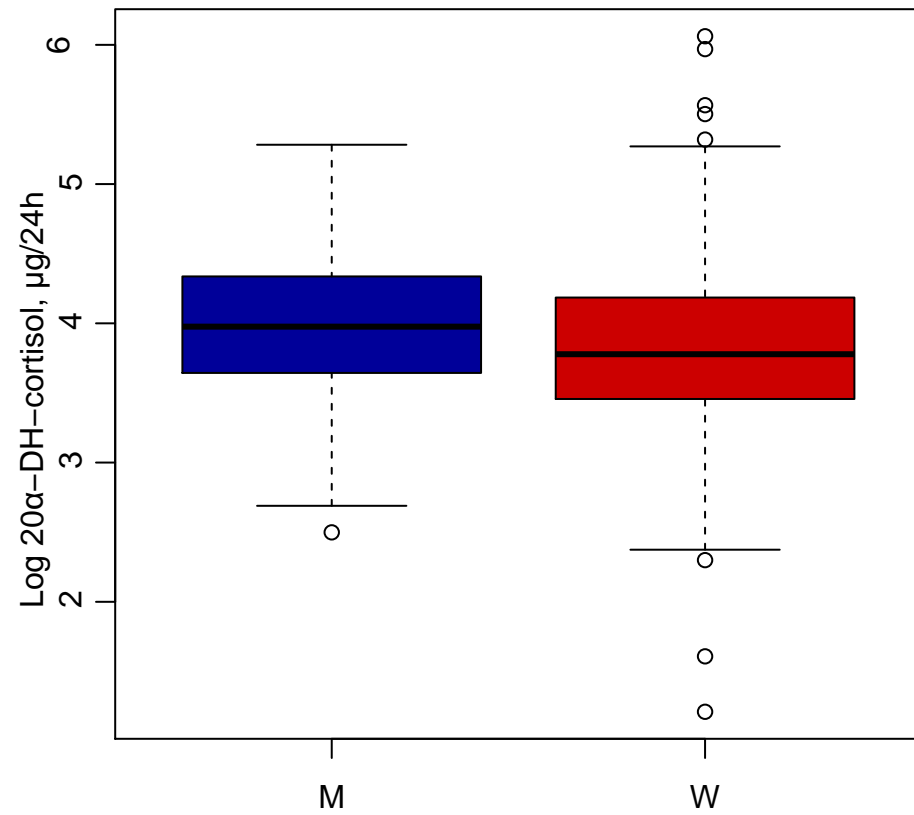

(b) M:  $p = 0.075$  W:  $p = 0.032$

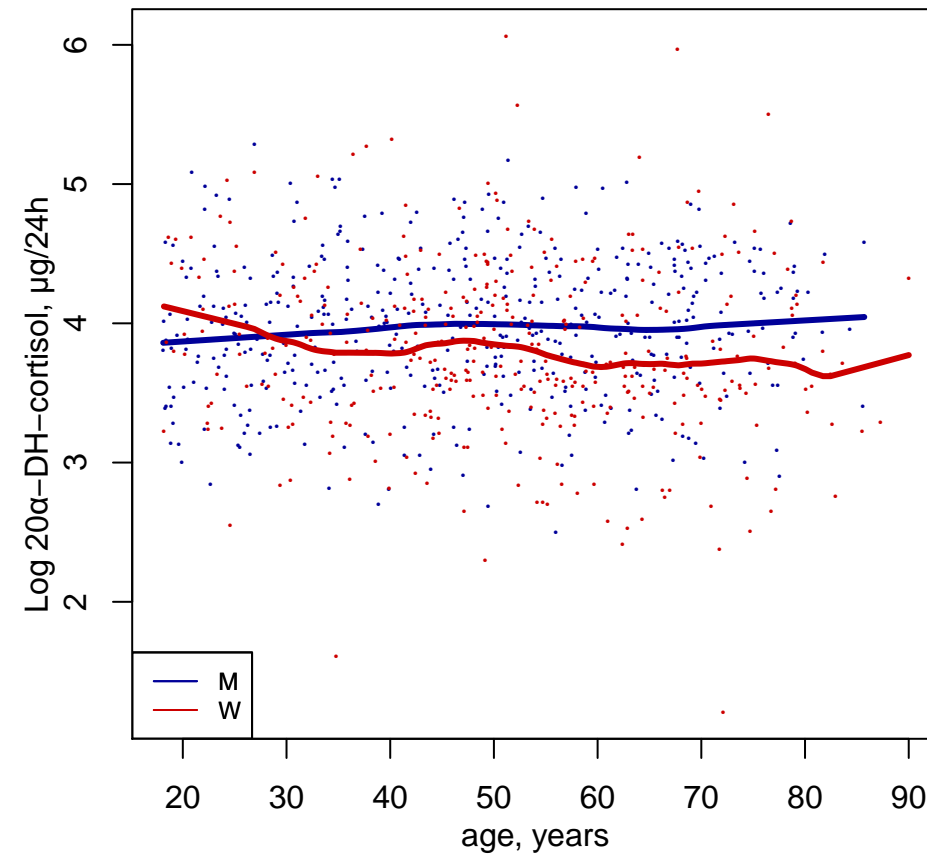

(c) TR= 0.1 nout= 0 sk= 0.02 ku= -0.29

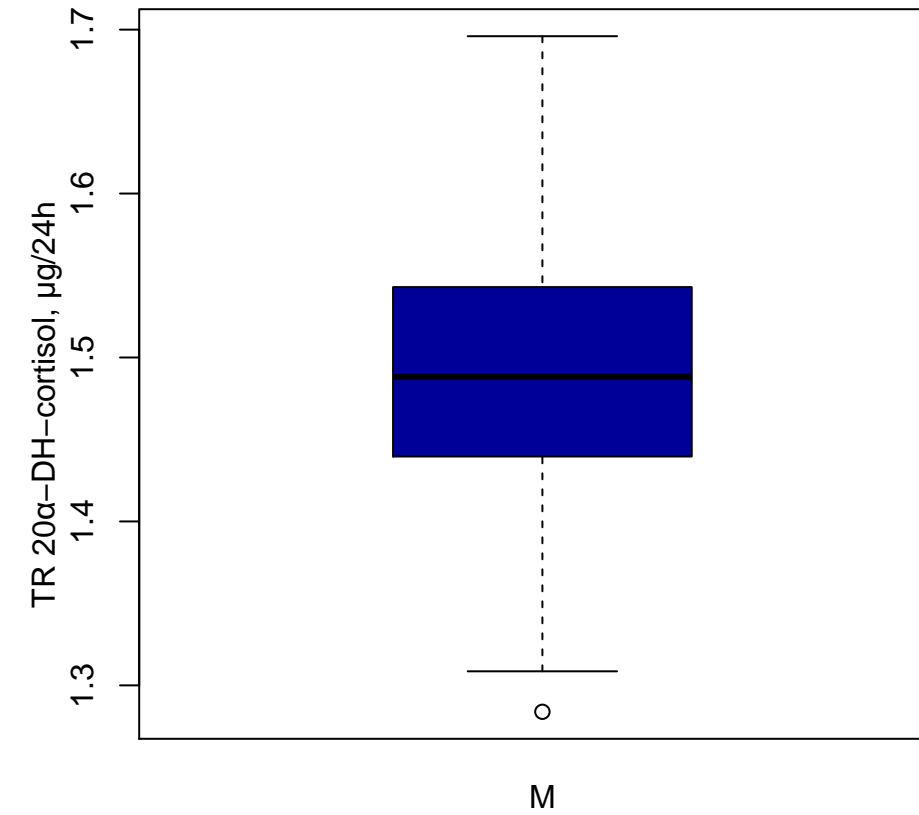

(d) TR= -0.1 nout= 2 sk= 0.09 ku= -0.29

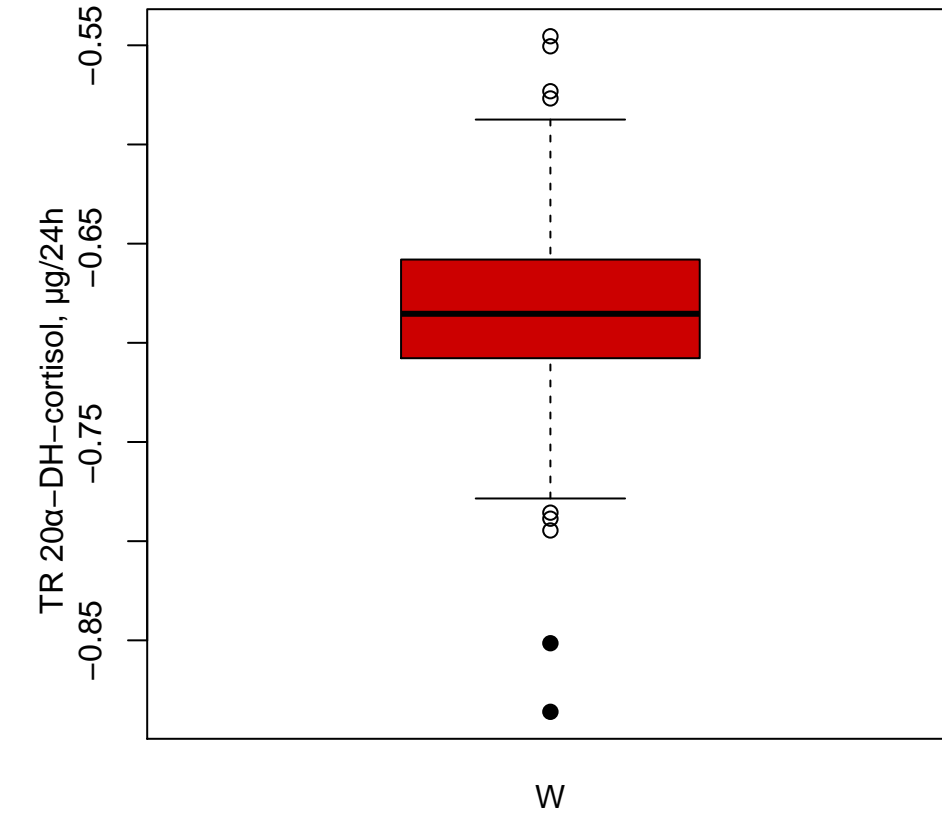

(e) D vs N:  $\delta = 0.65$   $p = 0$

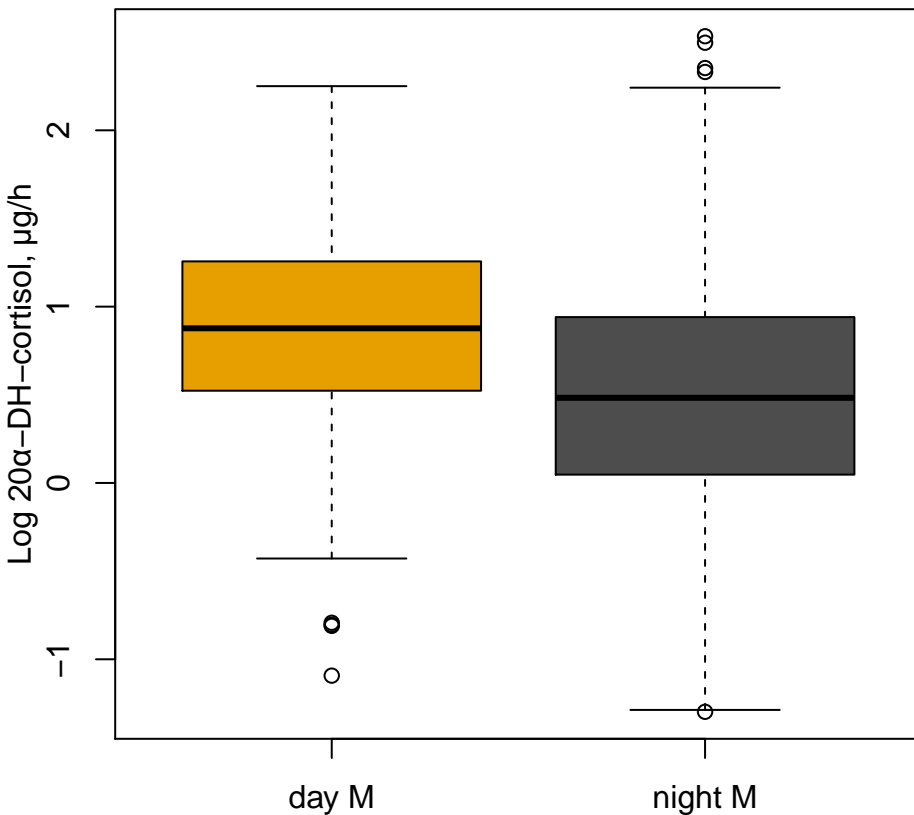

(f) D vs N:  $\delta = 0.4$   $p = 0$

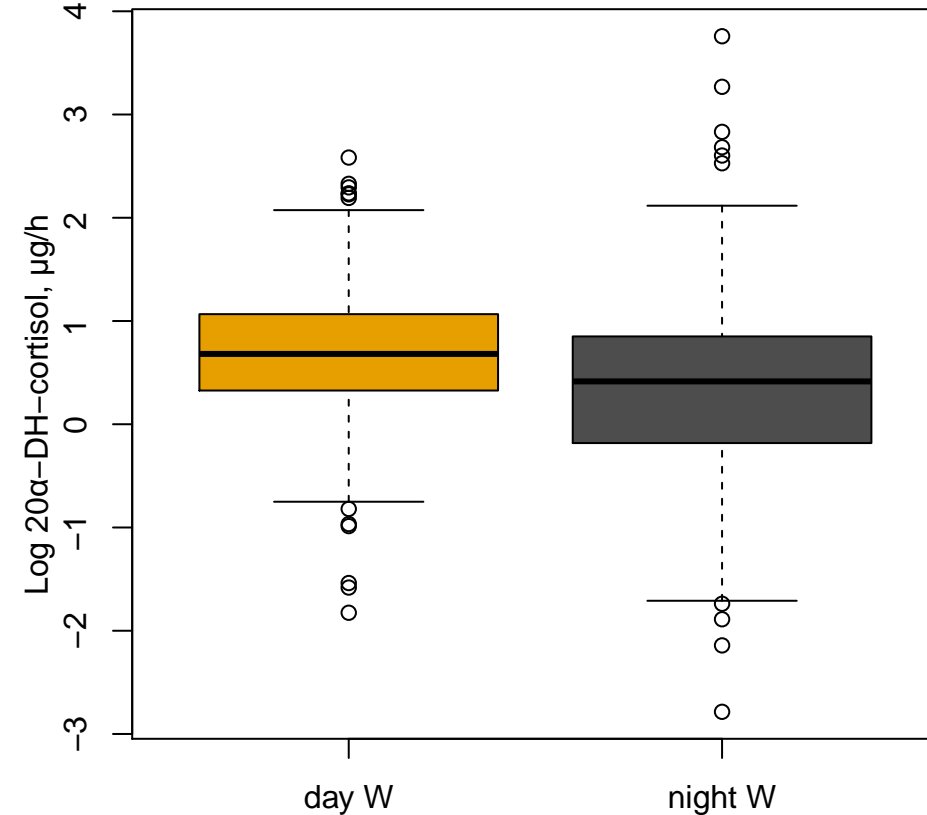

(g) M :  $\rho = 0.454$   $n = 455$

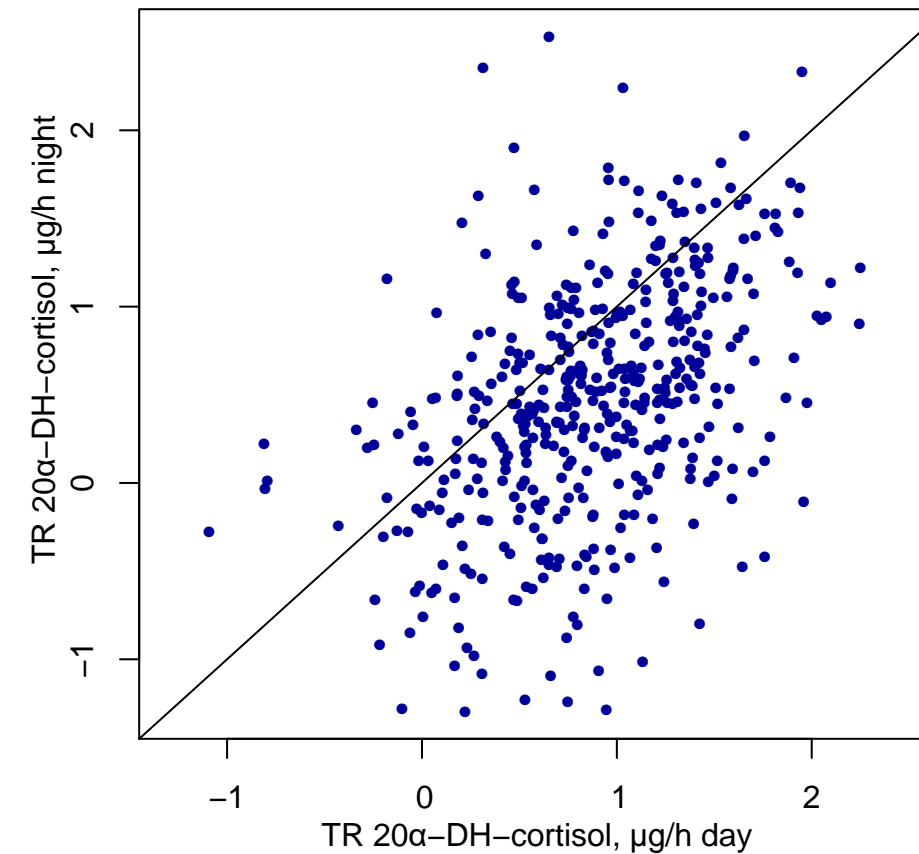

(h) W :  $\rho = 0.489$   $n = 379$

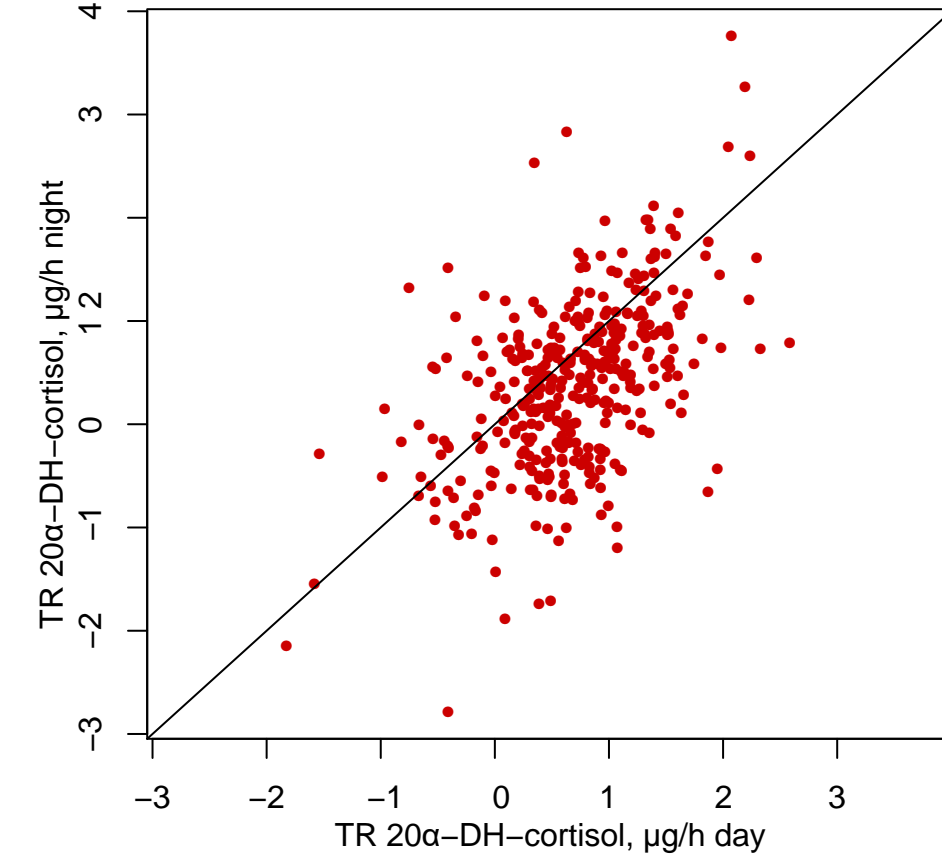

(a) M vs W:  $\delta = 1.13$   $p = 0$

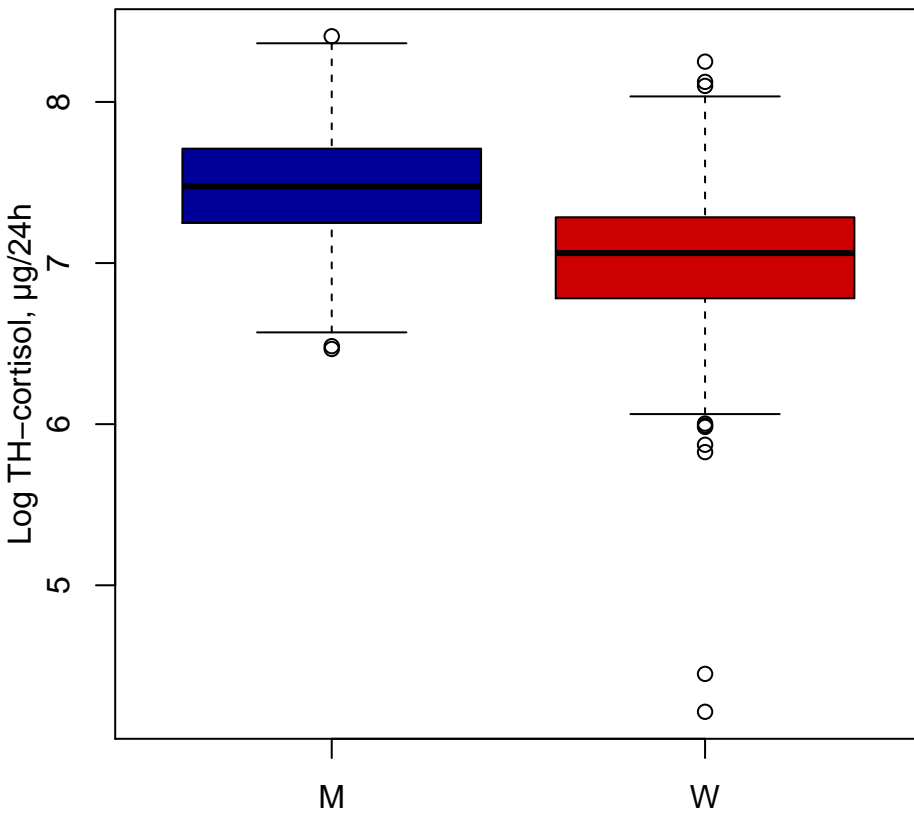

(b) M:  $p = 0.001$  W:  $p = 0$

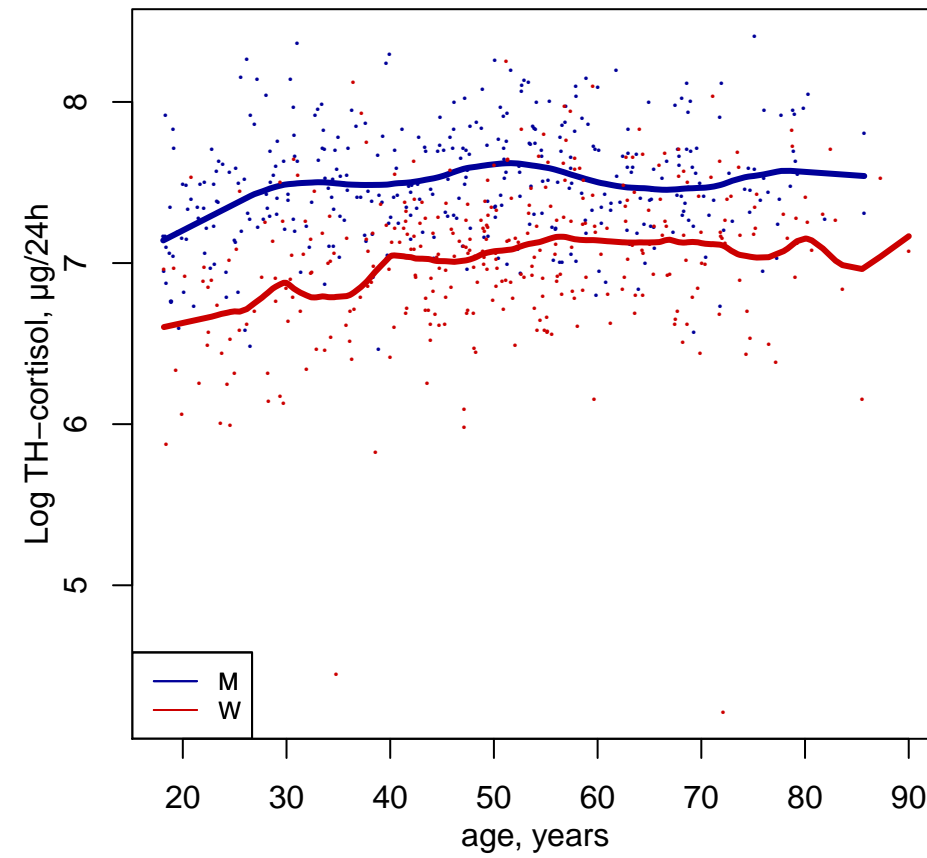

(c) TR= 0 nout= 0 sk= -0.04 ku= -0.12

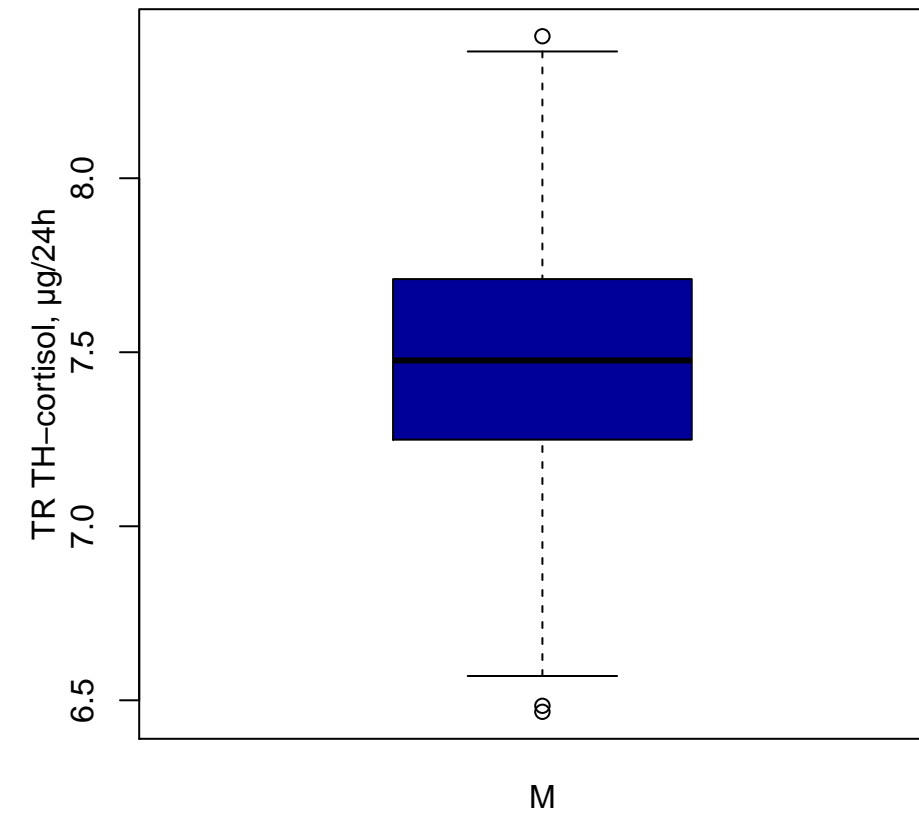

(d) TR= 0.1 nout= 2 sk= -0.01 ku= -0.12

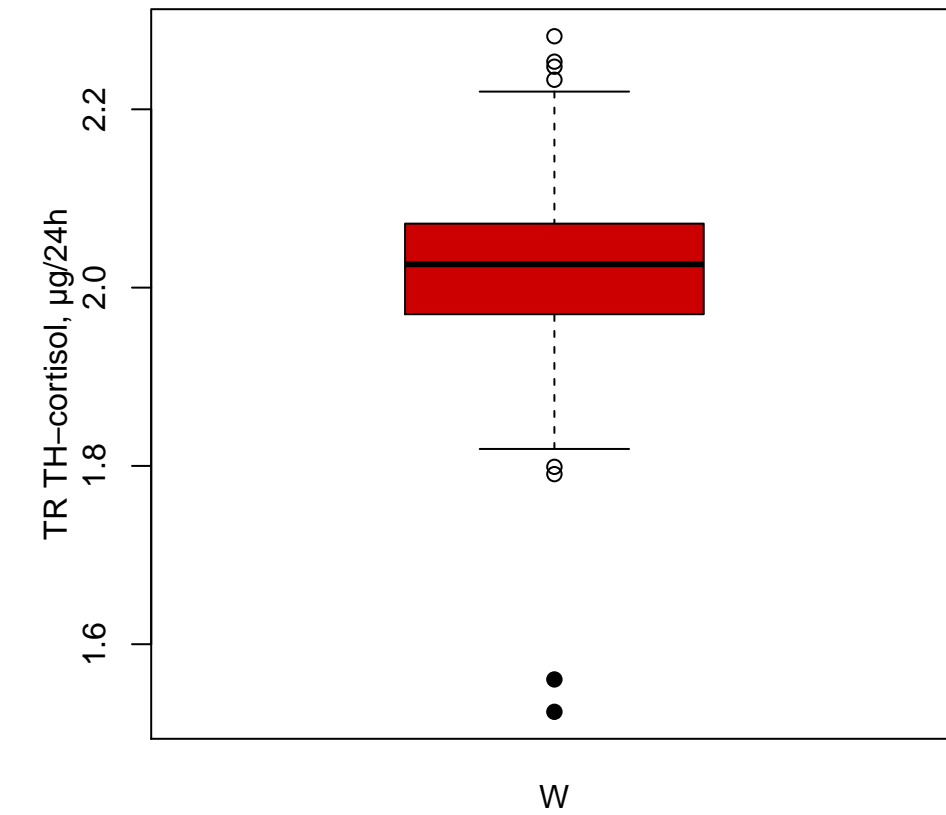

(e) D vs N:  $\delta = 1.12$   $p = 0$

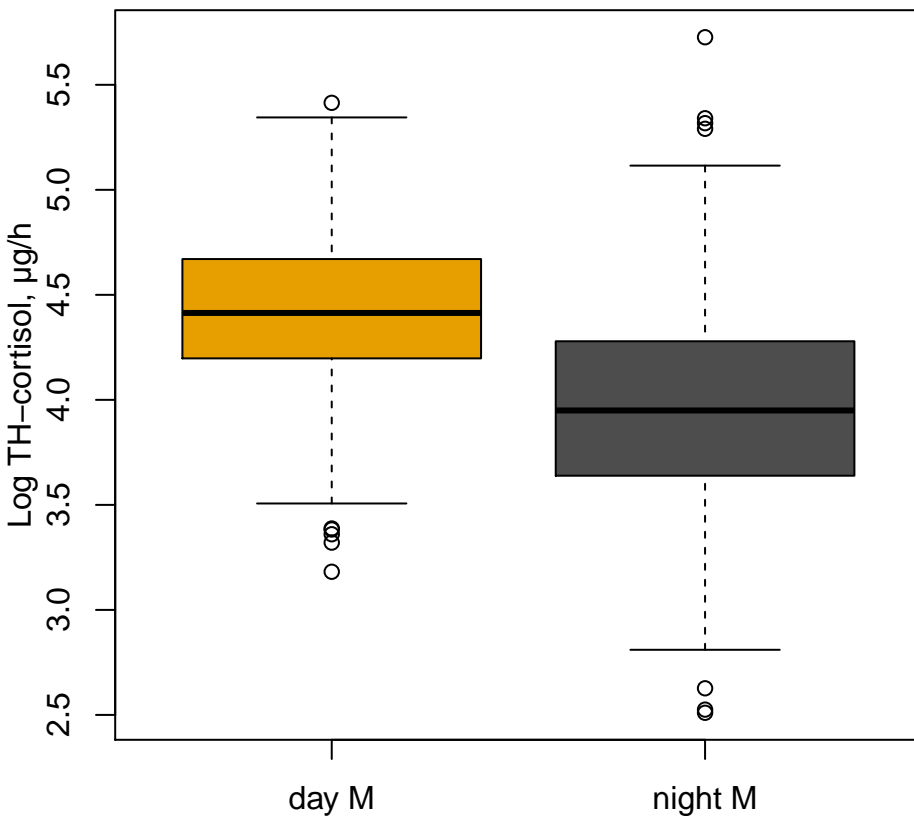

(f) D vs N:  $\delta = 1.12$   $p = 0$

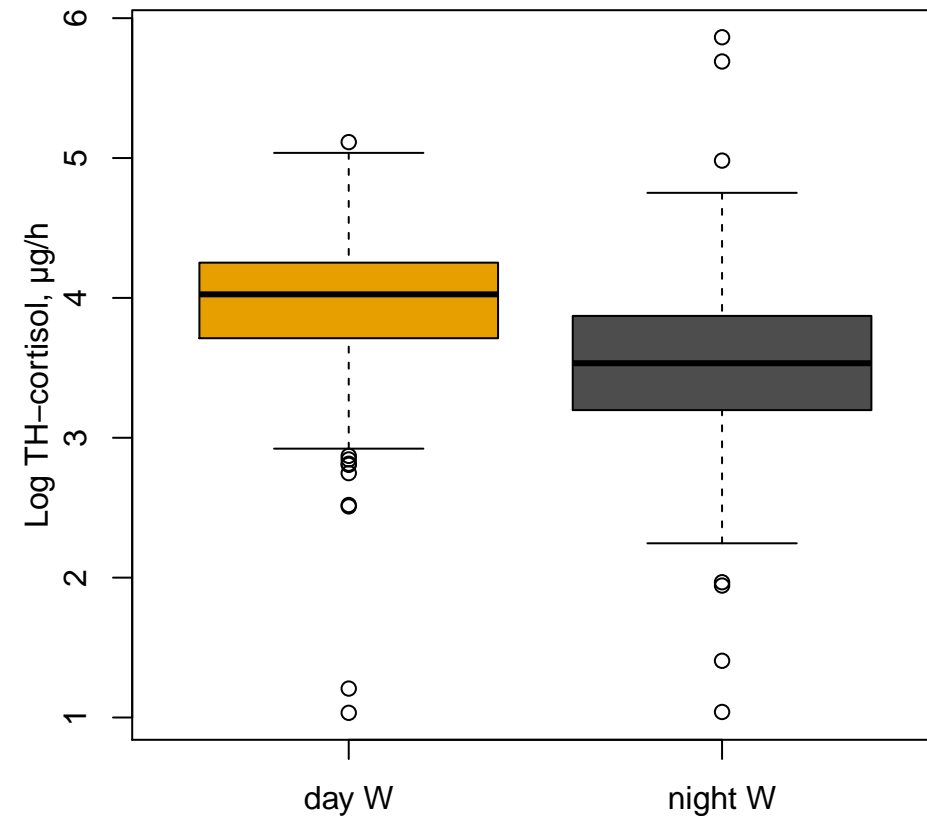

(g) M :  $\rho = 0.492$   $n = 369$

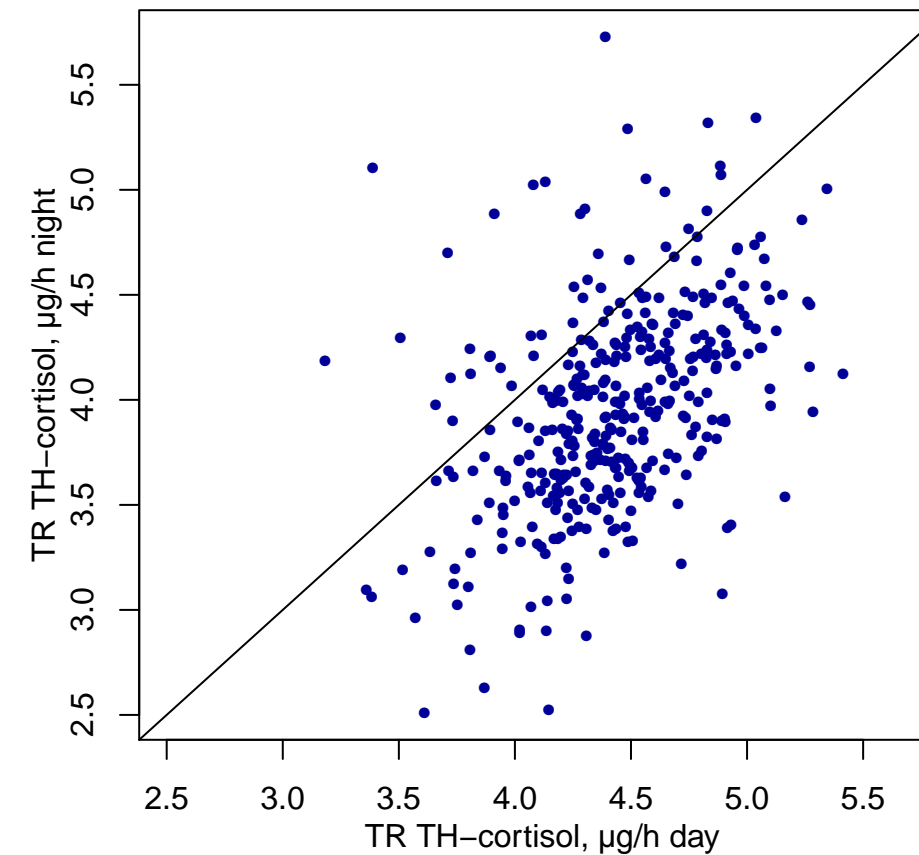

(h) W :  $\rho = 0.598$   $n = 340$

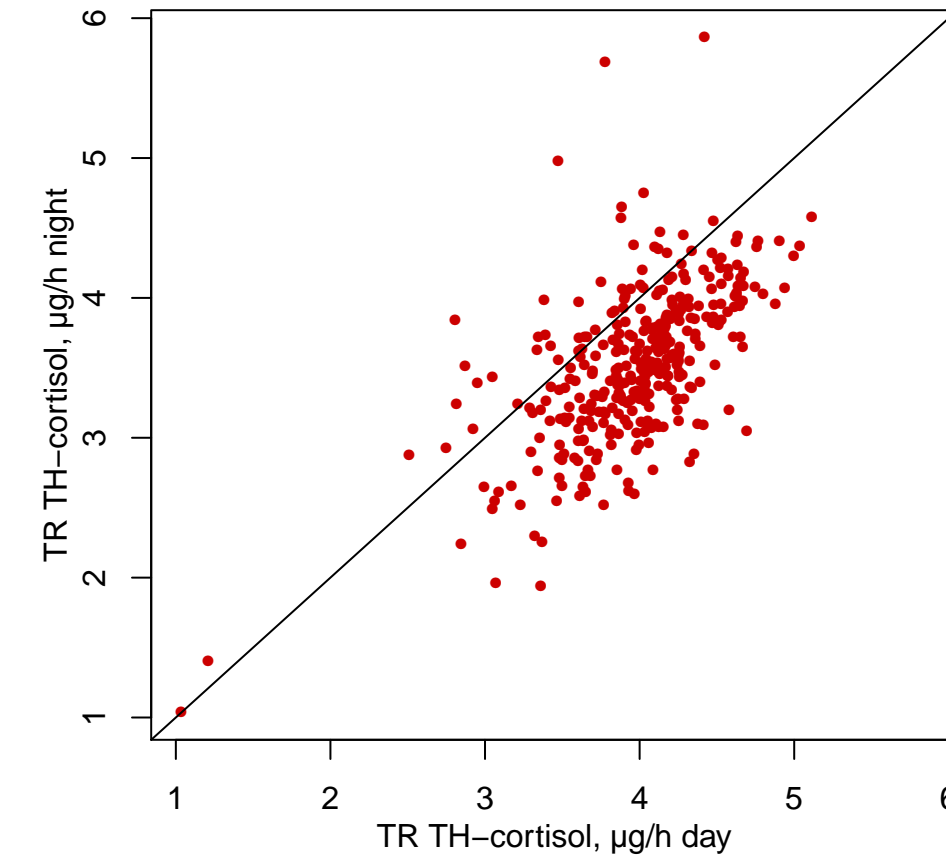

(a) M vs W: delta= 1.03 p = 0

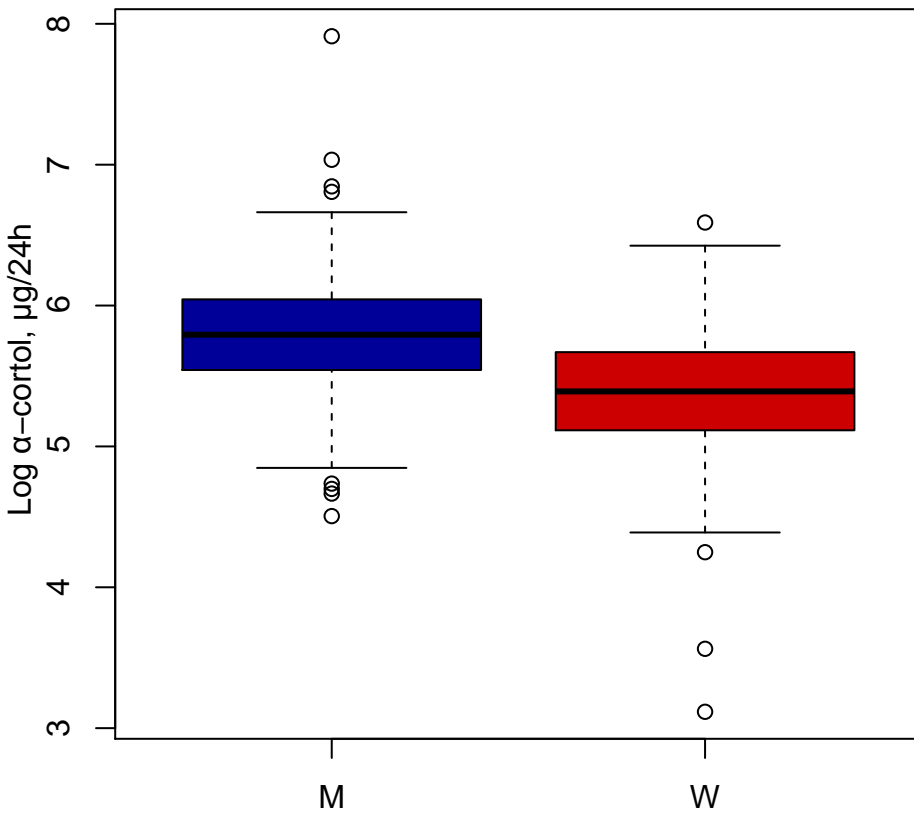

(b) M: p = 0 W: p = 0.036

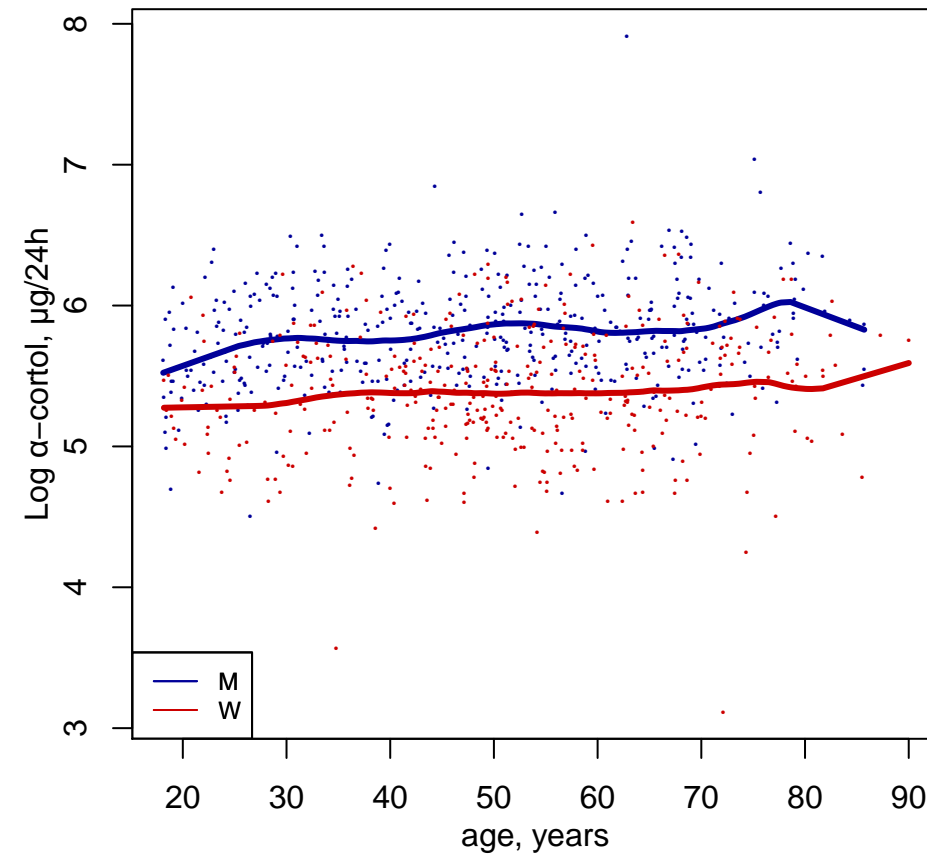

(c) TR= 0 nout= 1 sk= -0.05 ku= 0.39

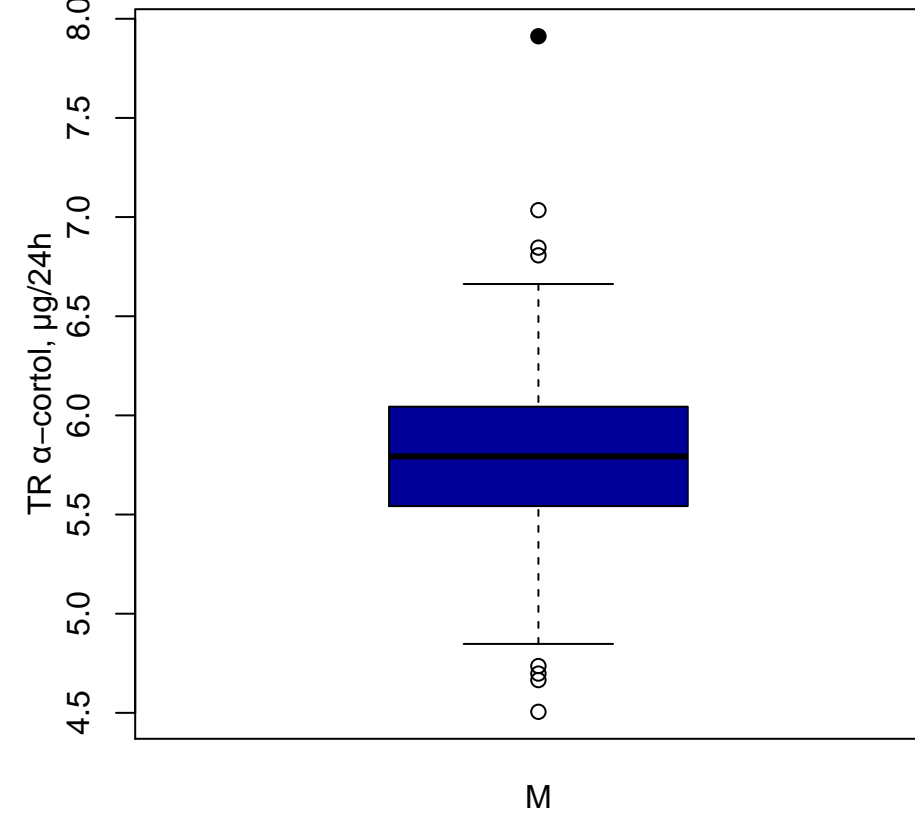

(d) TR= -0.1 nout= 2 sk= -0.04 ku= 0.39

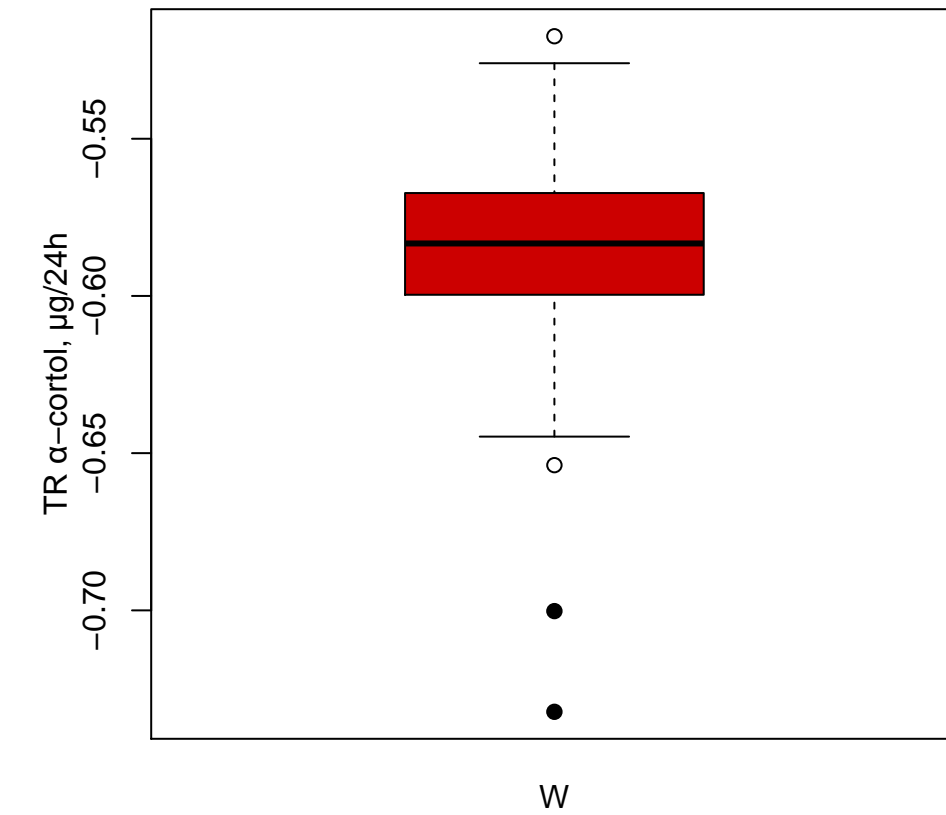

(e) D vs N: delta= 0.88 p = 0

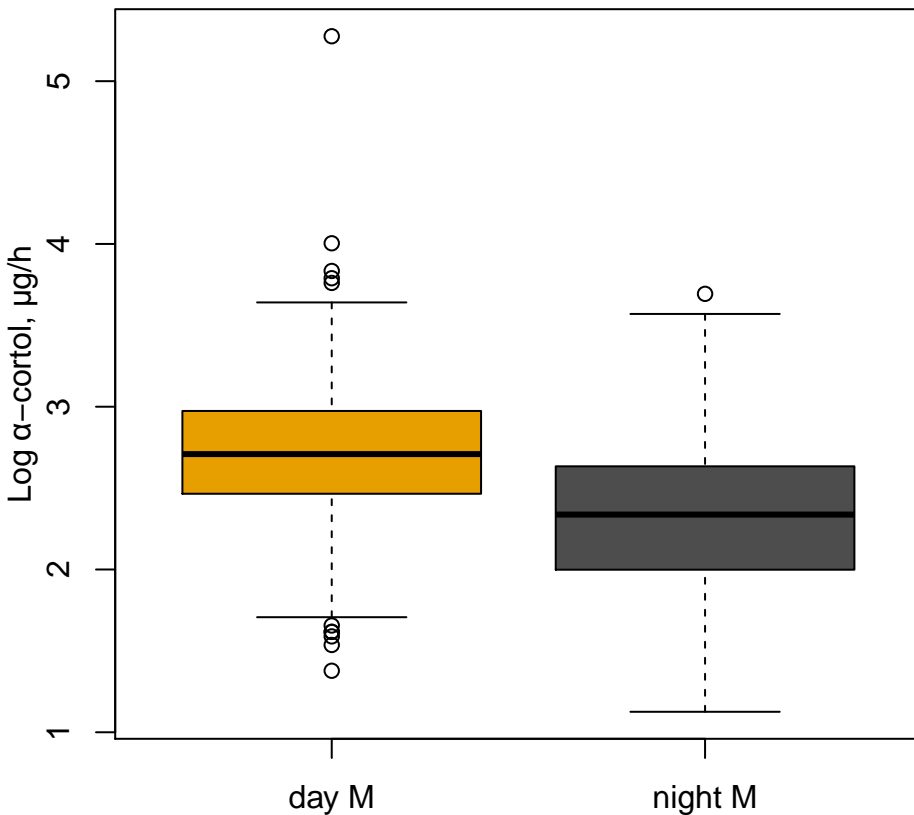

(f) D vs N: delta= 0.92 p = 0

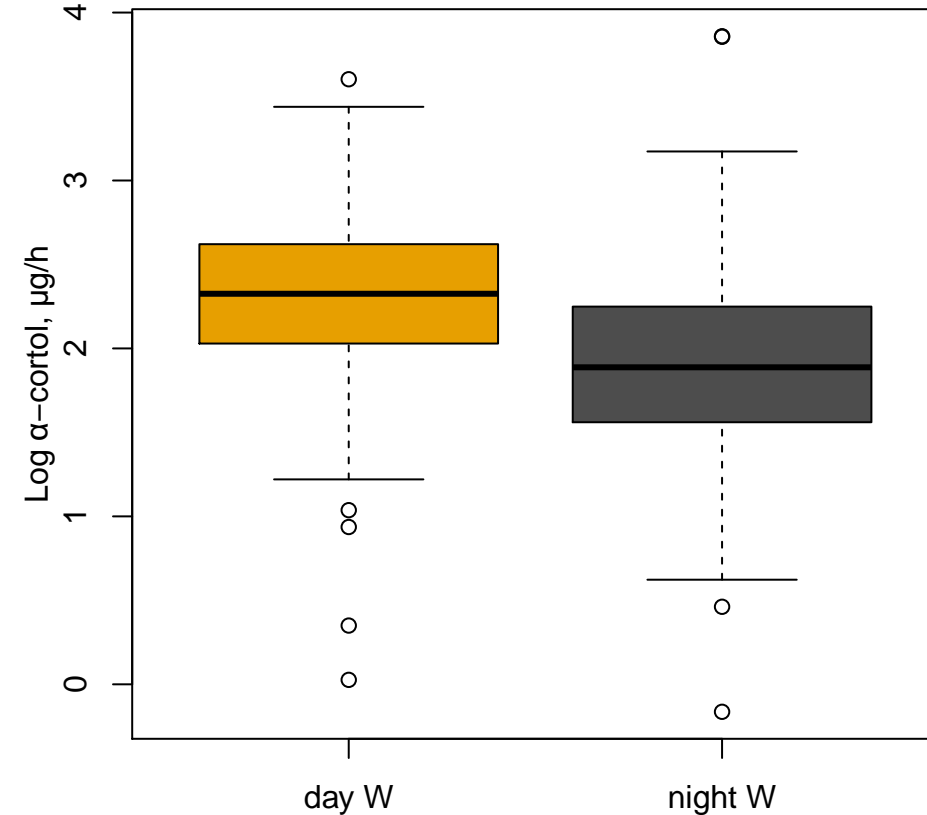

(g) M : rho= 0.526 n= 450

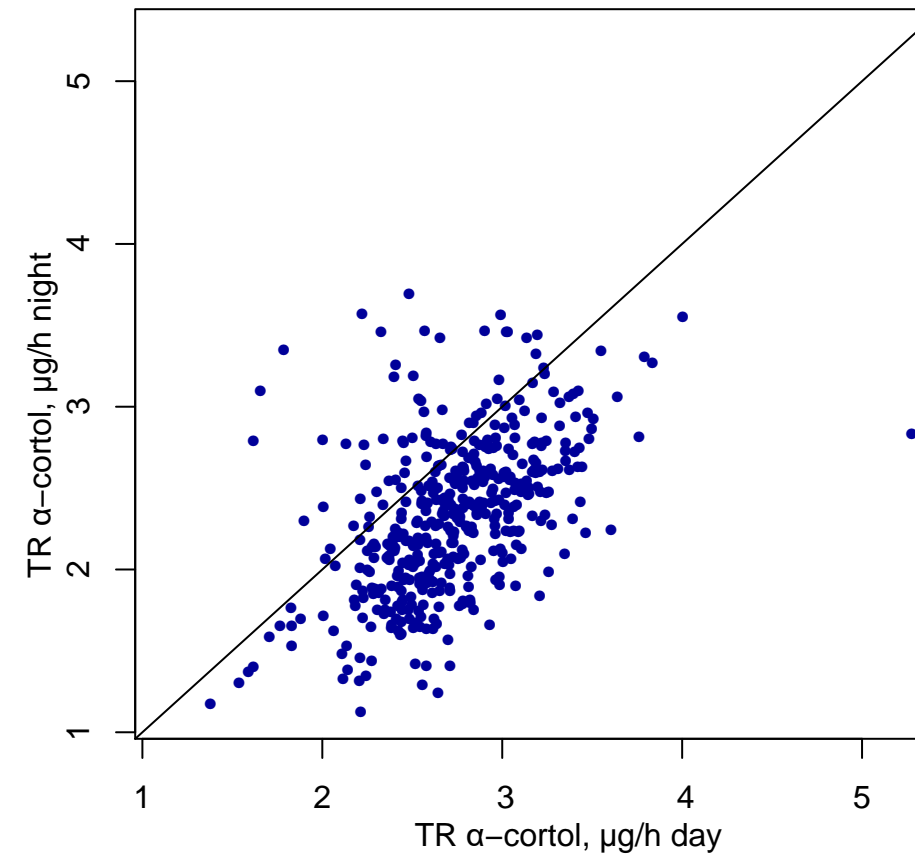

(h) W : rho= 0.624 n= 379

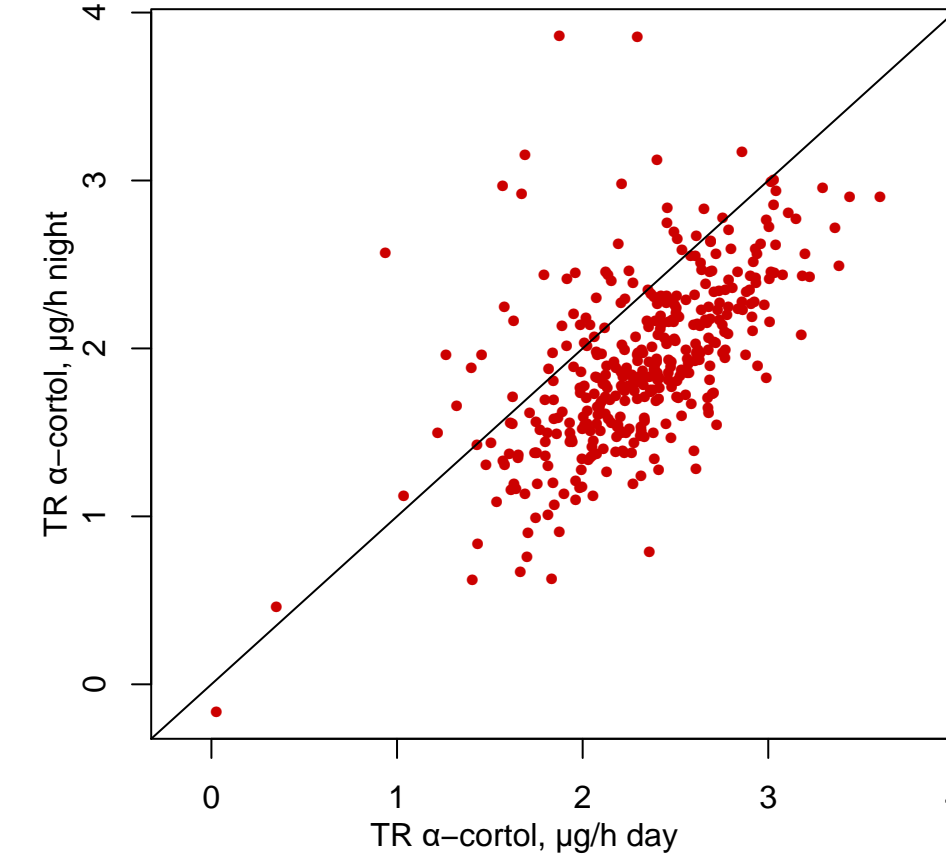

(a) M vs W: delta= 1.17 p = 0

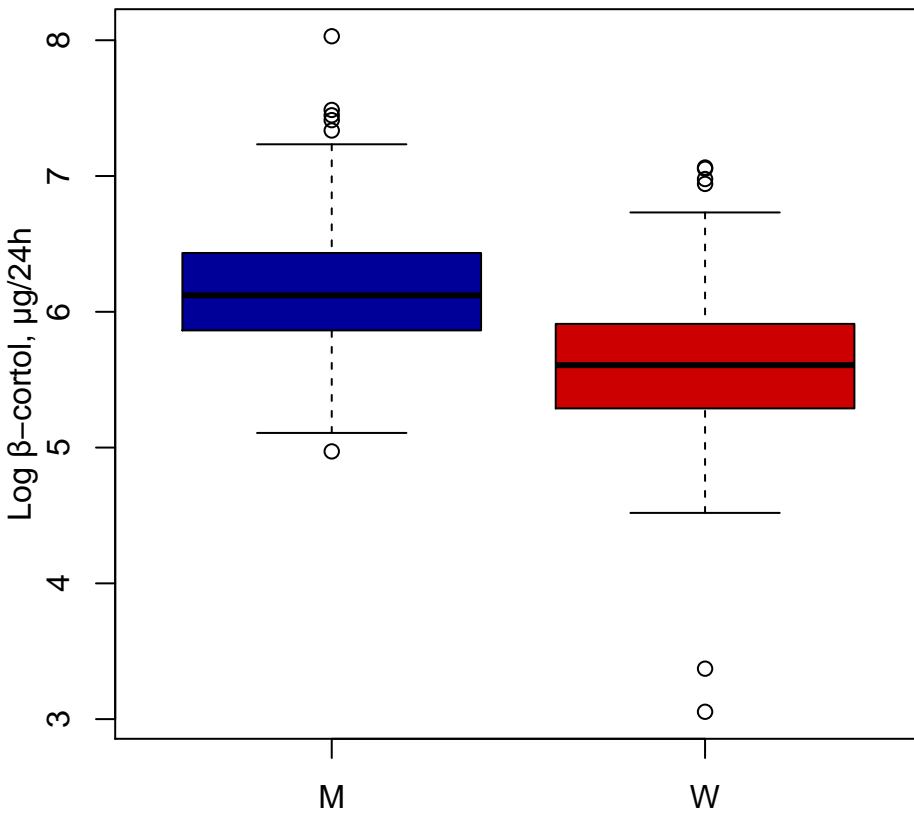

(b) M: p = 0.019 W: p = 0.561

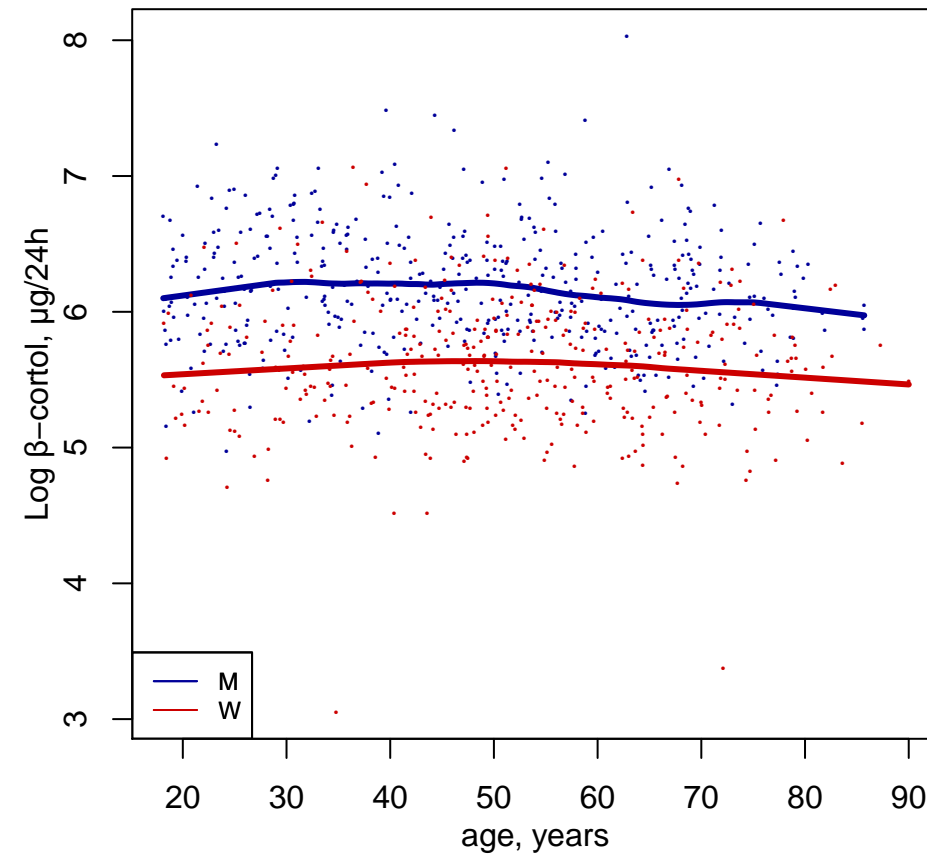

(c) TR= -0.2 nout= 0 sk= 0.06 ku= 0.14

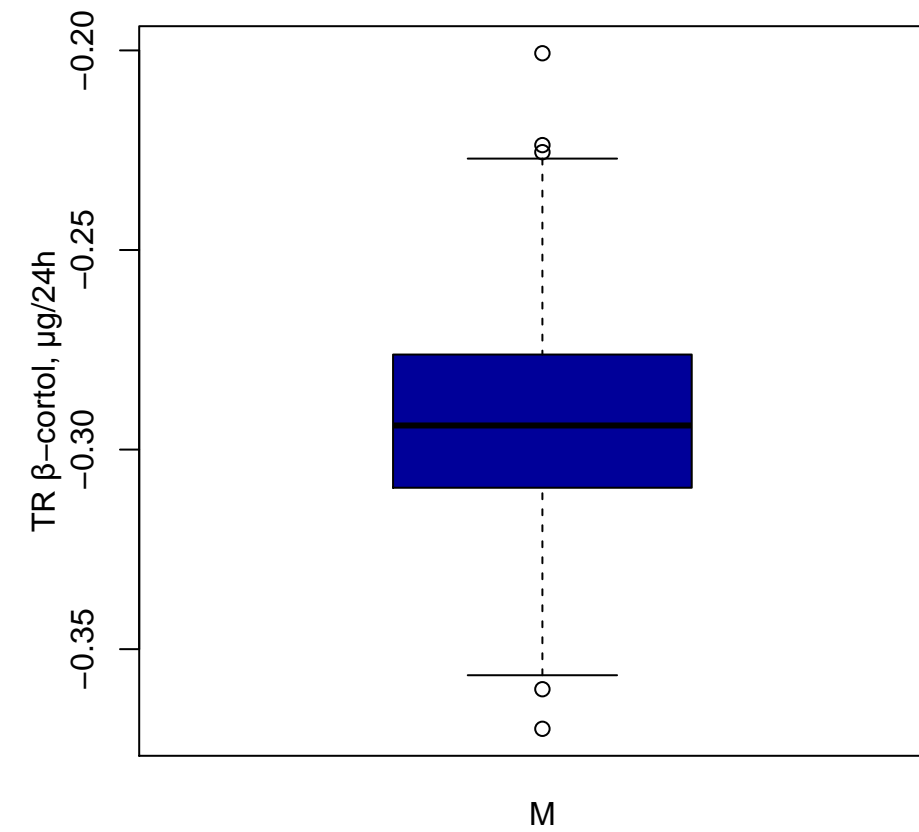

(d) TR= -0.3 nout= 2 sk= 0.01 ku= 0.14

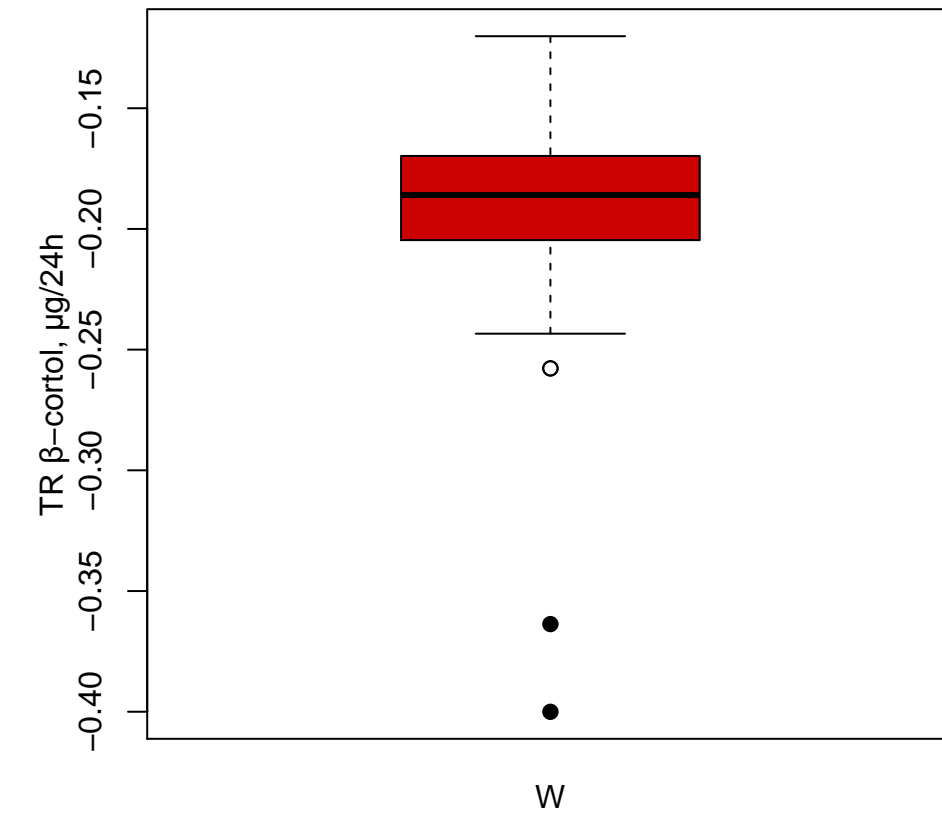

(e) D vs N: delta= 0.47 p = 0

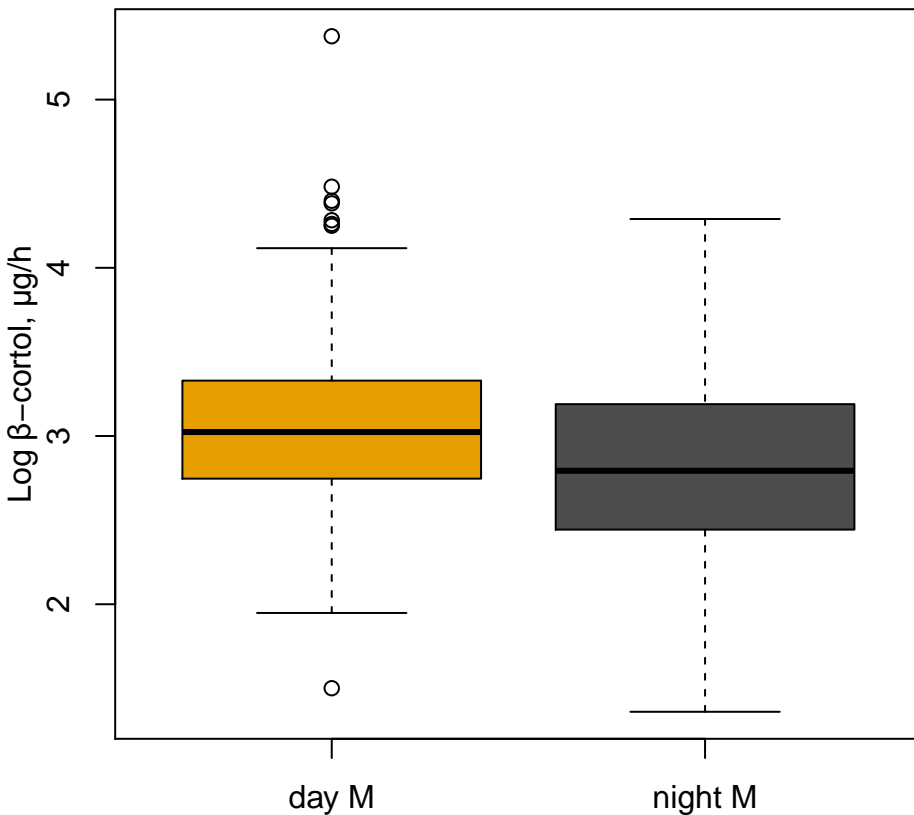

(f) D vs N: delta= 0.58 p = 0

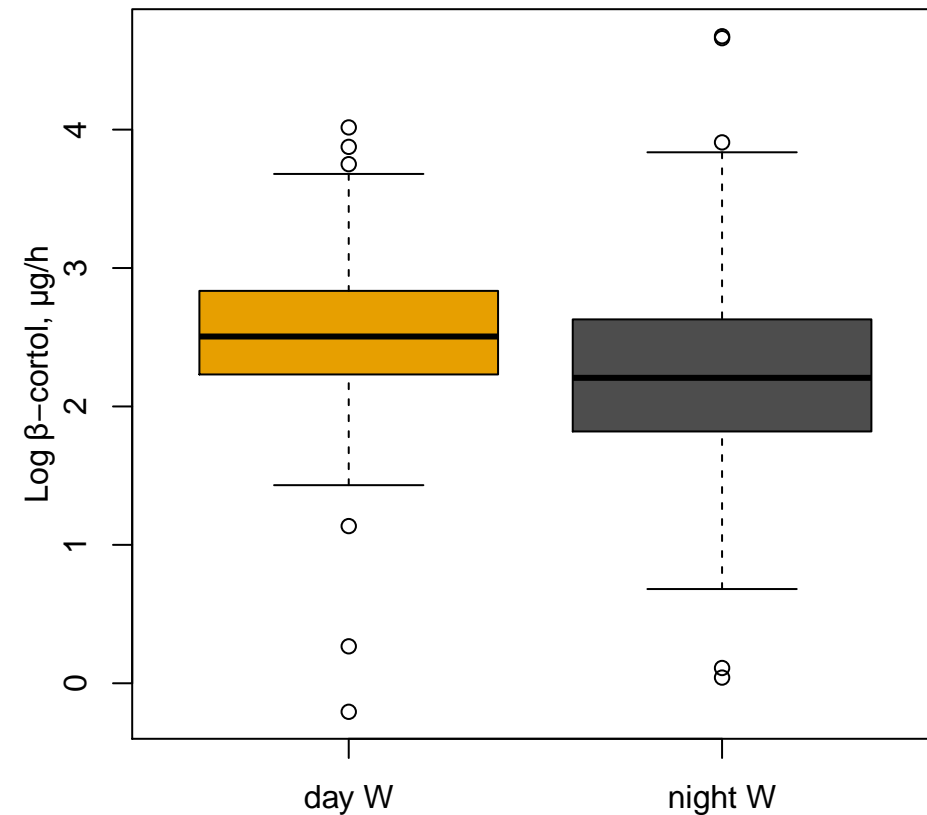

(g) M : rho= 0.608 n= 451

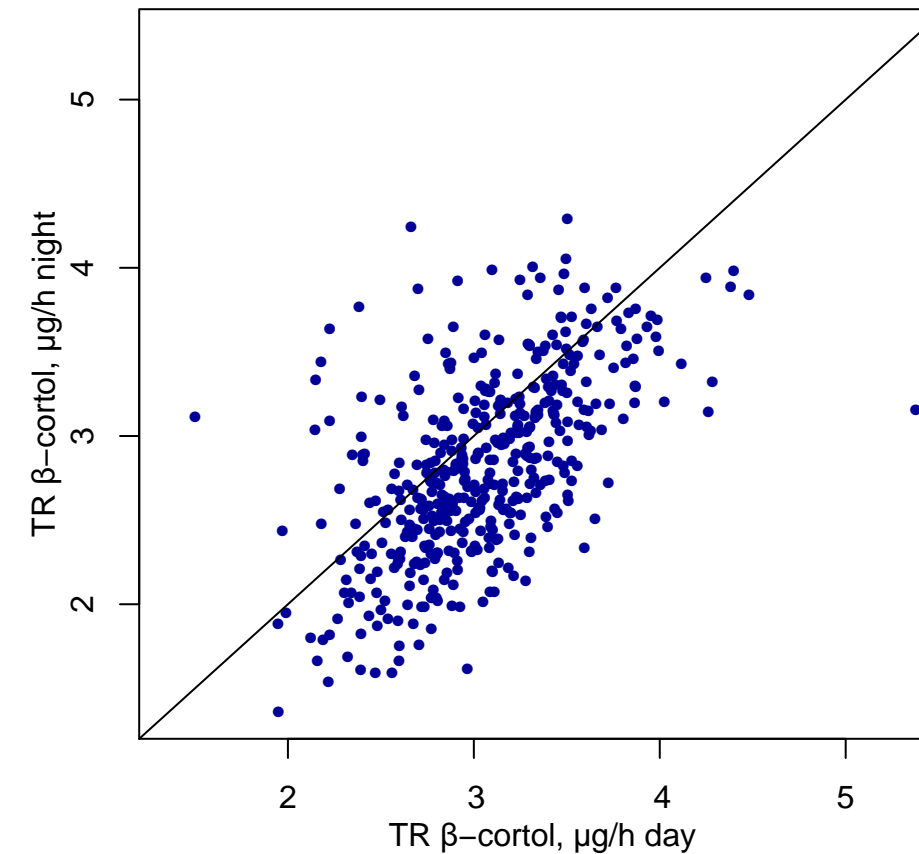

(h) W : rho= 0.677 n= 378

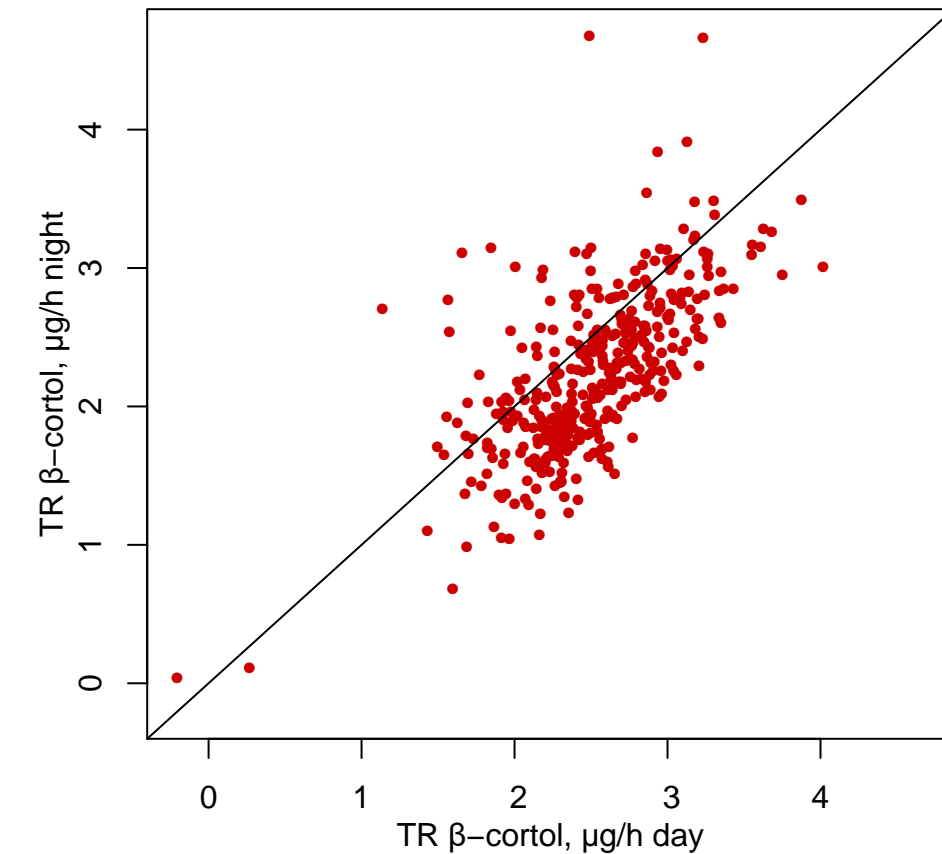



(a) M vs W:  $\delta = 0.34$   $p = 0$

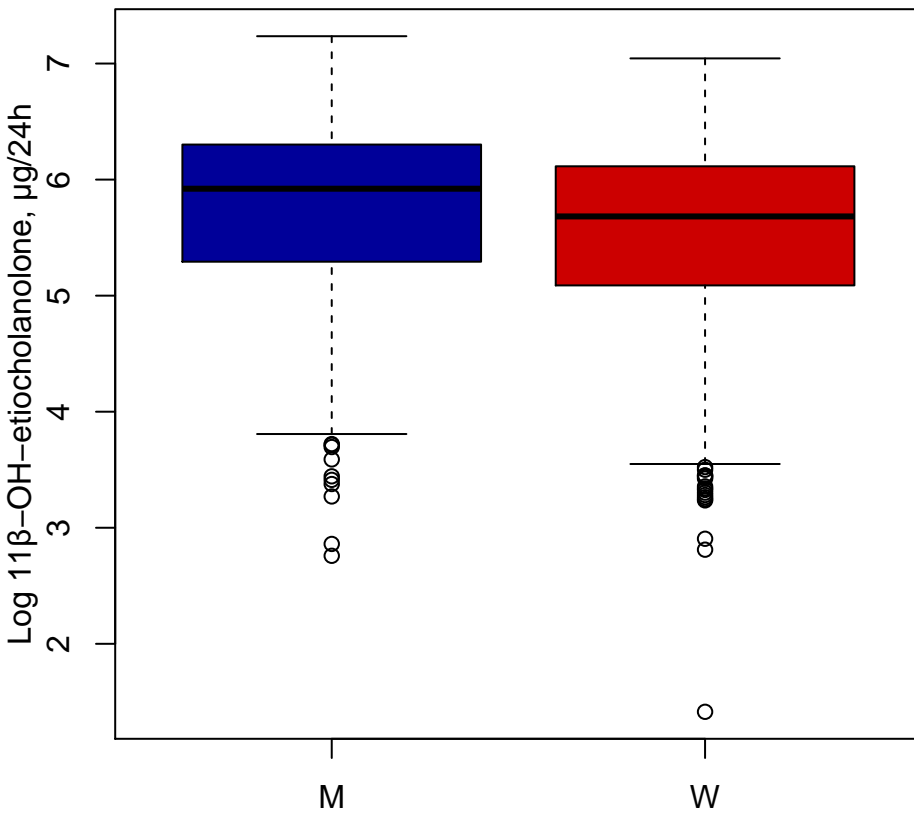

(b) M:  $p = 0.001$  W:  $p = 0.097$

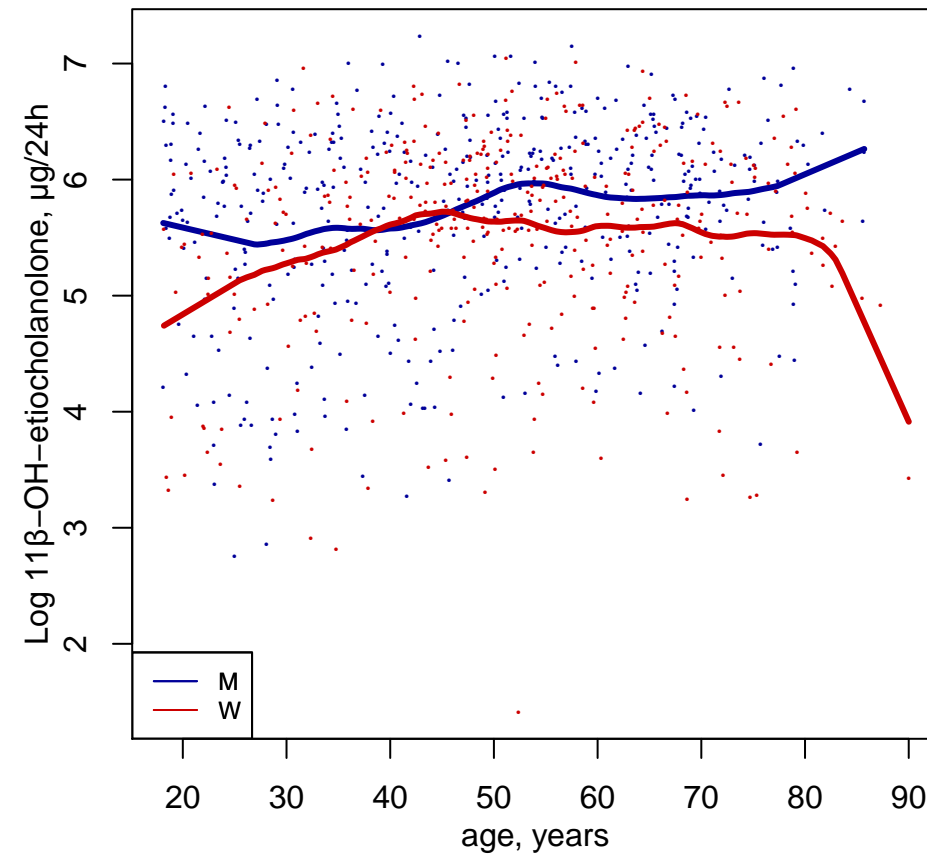

(c) TR= 0.5 nout= 0 sk= -0.02 ku= -0.49

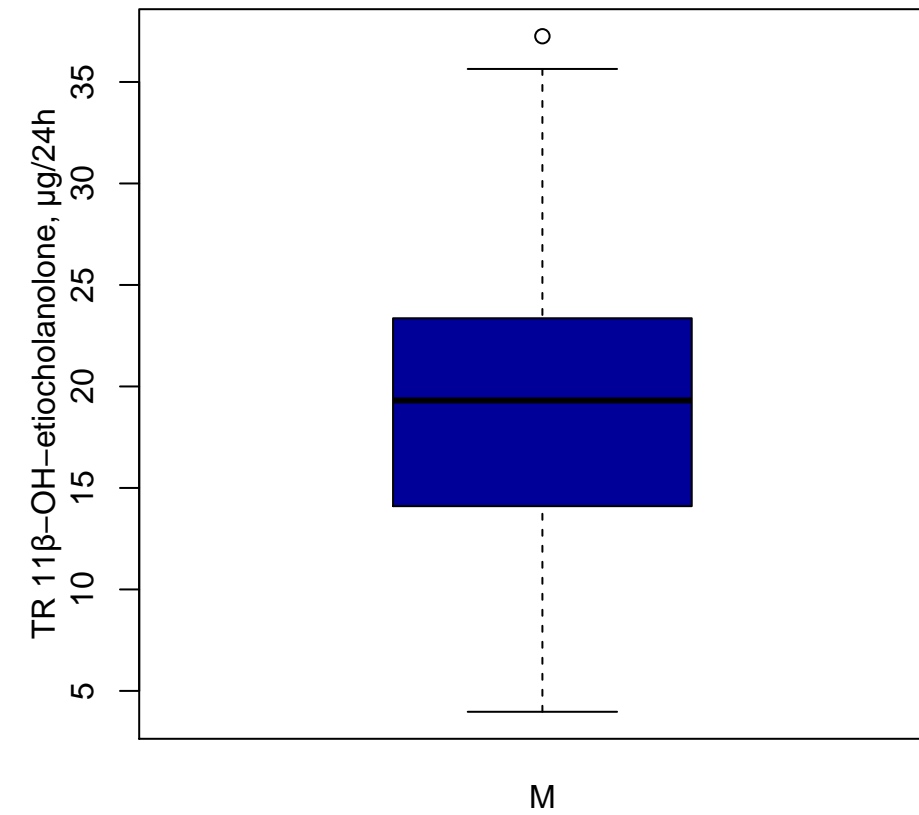

(d) TR= 0.5 nout= 0 sk= -0.01 ku= -0.49

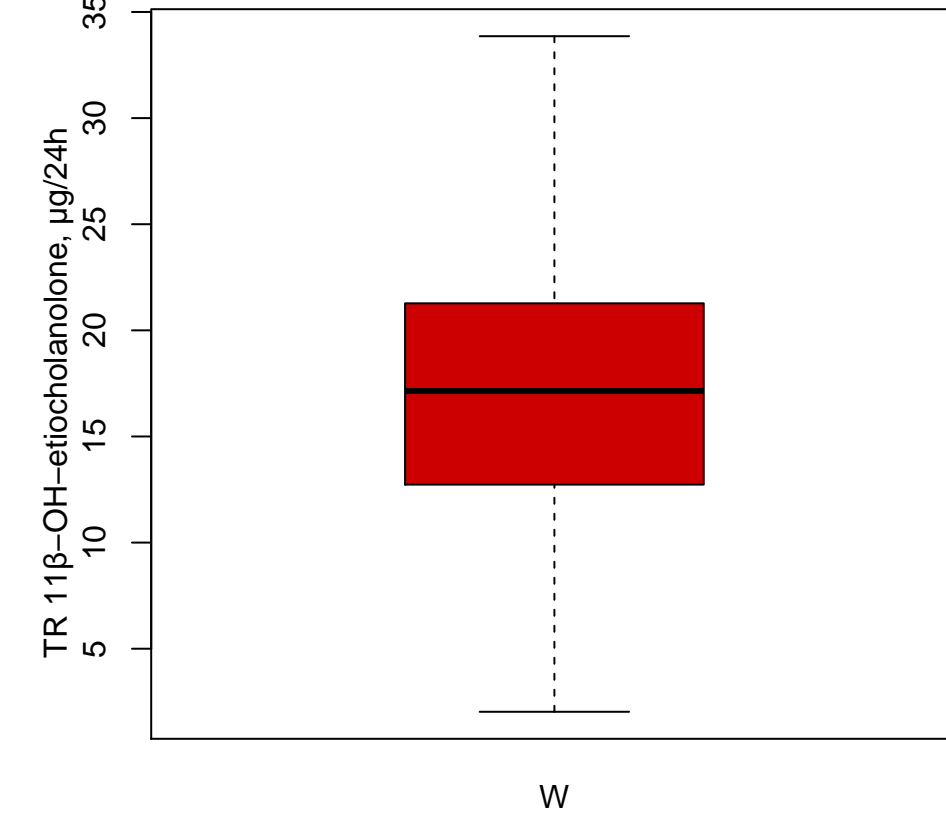

(e) D vs N:  $\delta = -0.1$   $p = 0.422$

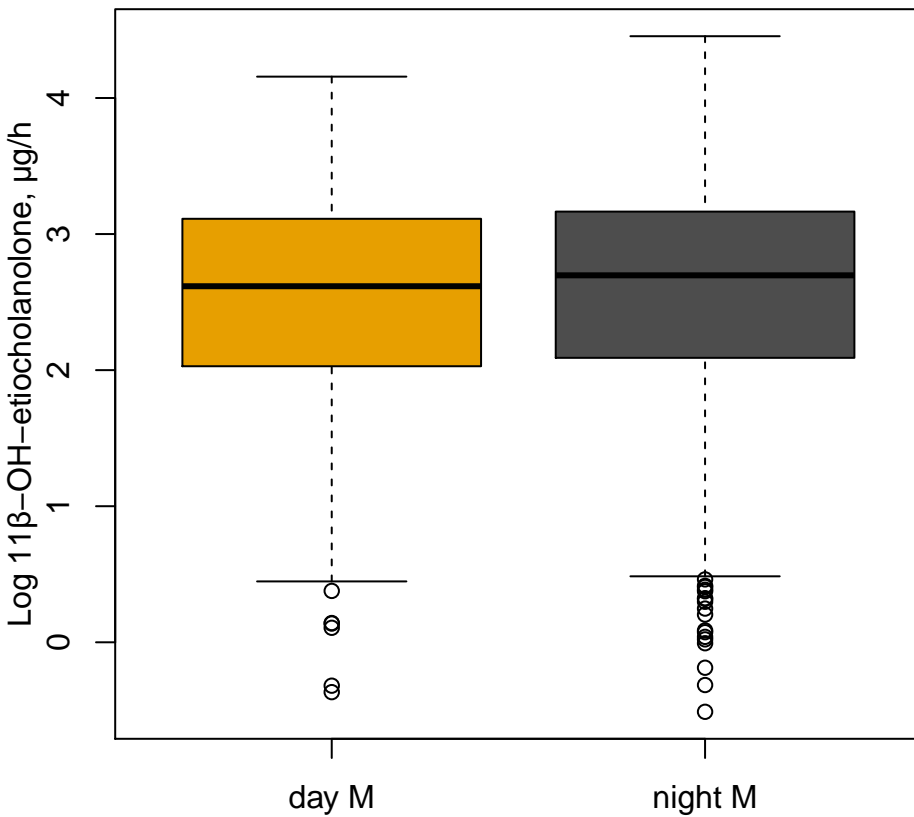

(f) D vs N:  $\delta = 0.01$   $p = 0.124$

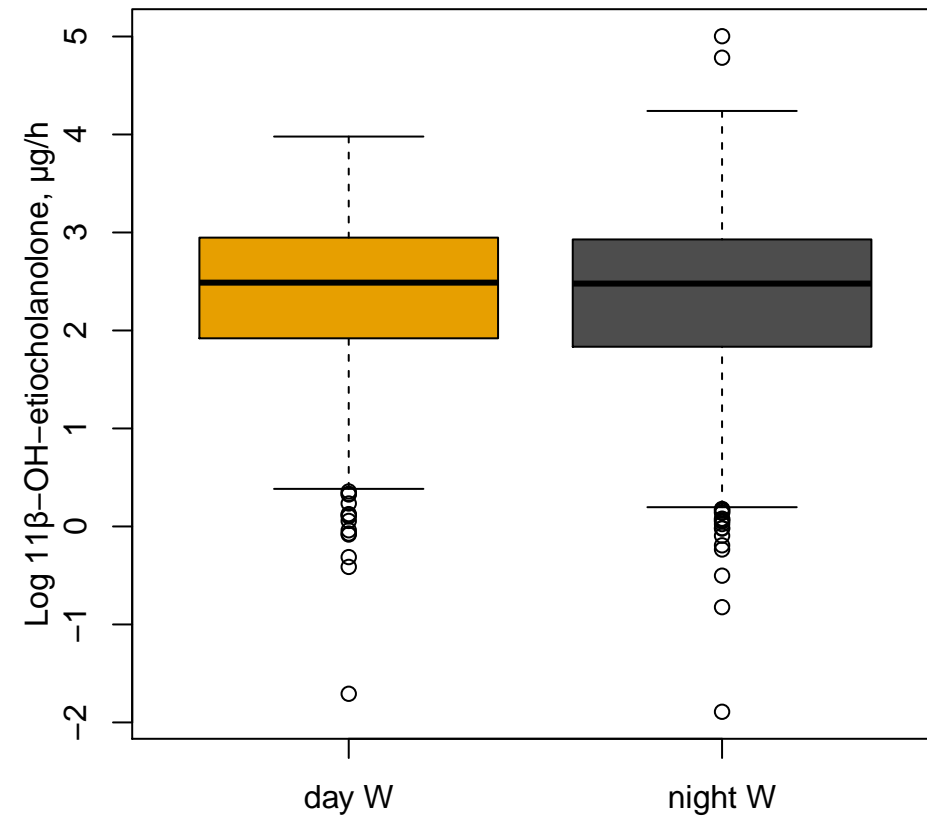

(g) M :  $\rho = 0.741$   $n = 453$

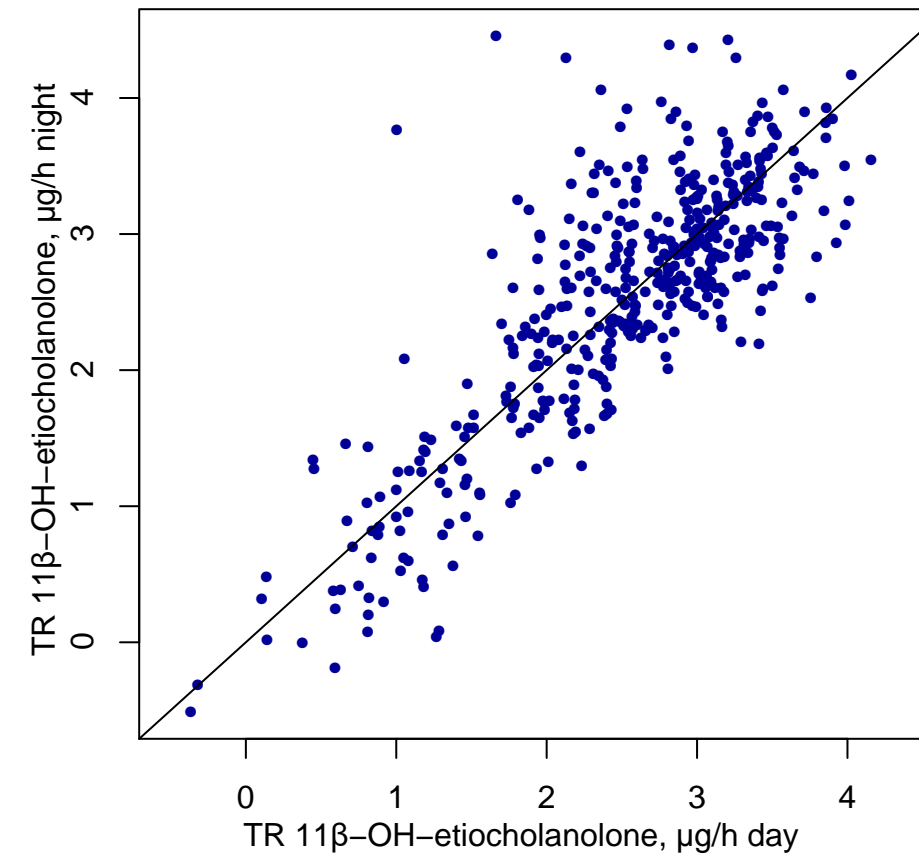

(h) W :  $\rho = 0.77$   $n = 378$

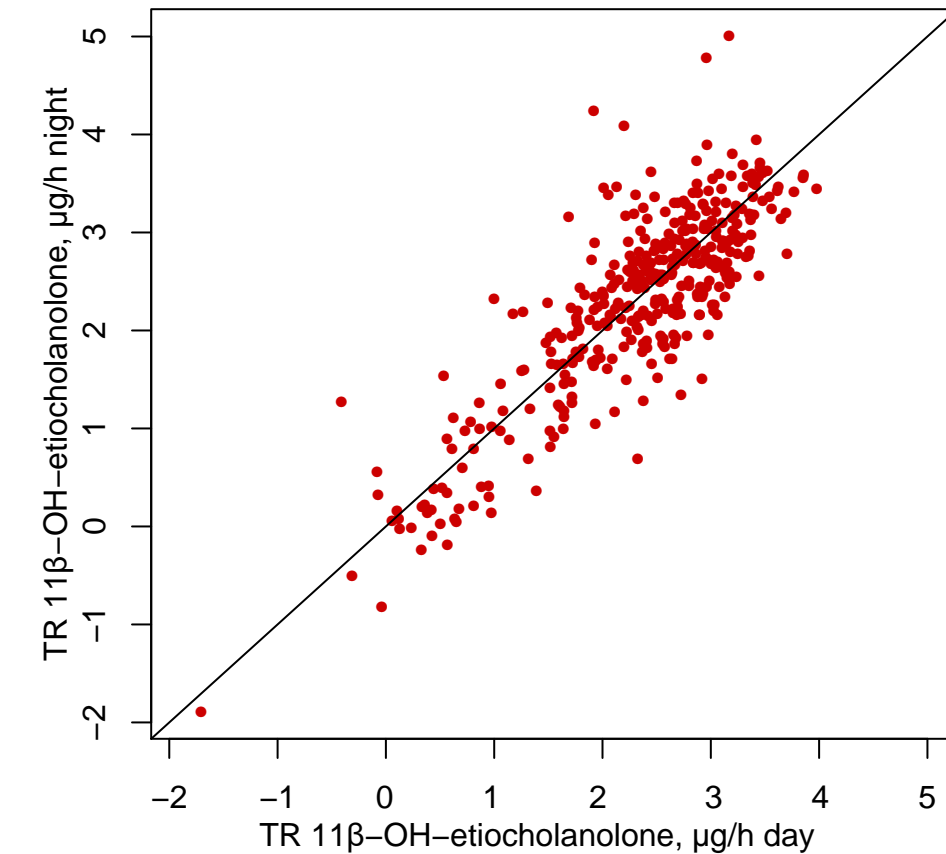

(a) M vs W: delta= 1.81 p = 0

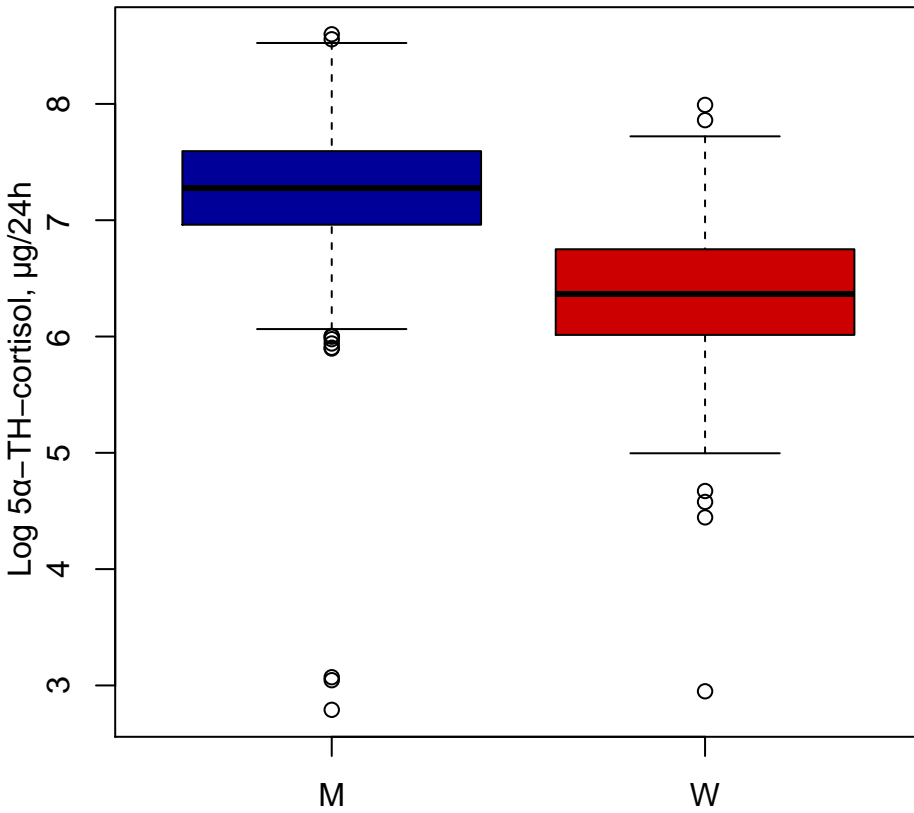

(b) M: p = 0.002 W: p = 0.606

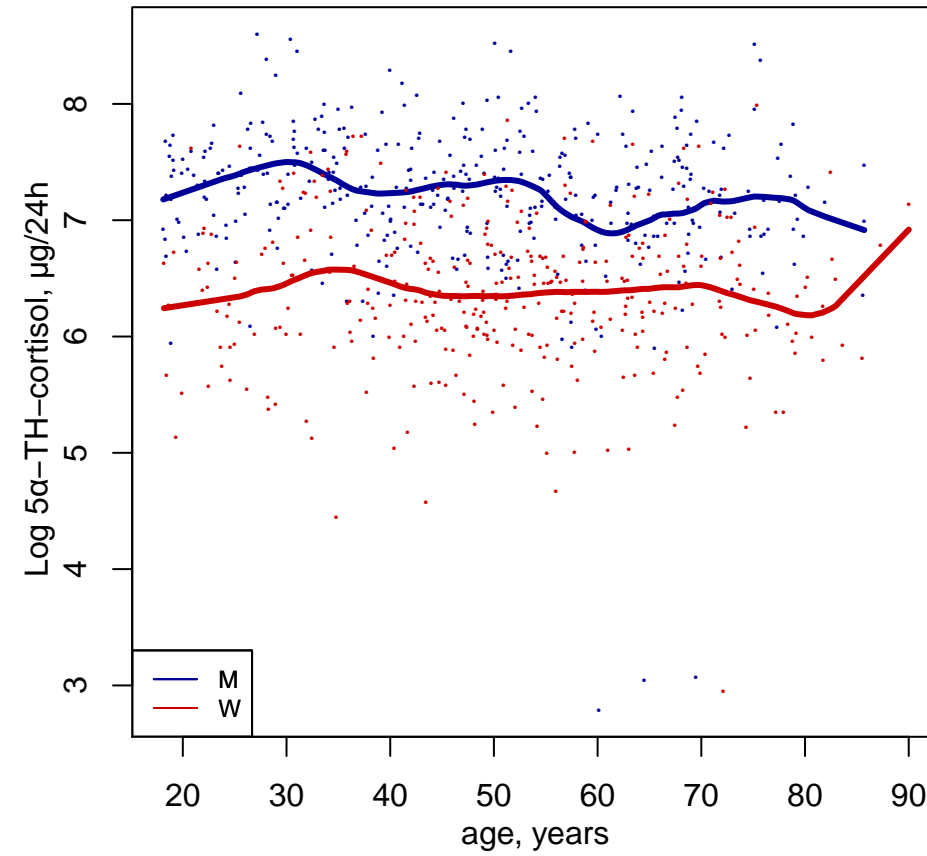

(c) TR= 0.1 nout= 3 sk= 0.02 ku= 0.33

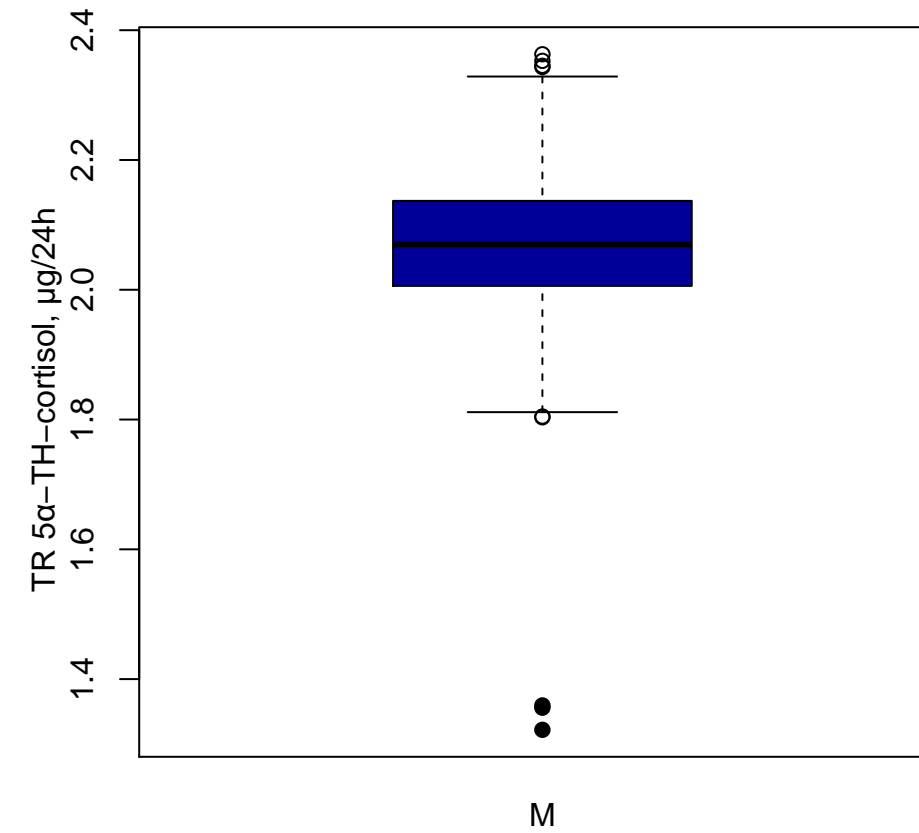

(d) TR= 0 nout= 1 sk= -0.09 ku= 0.33

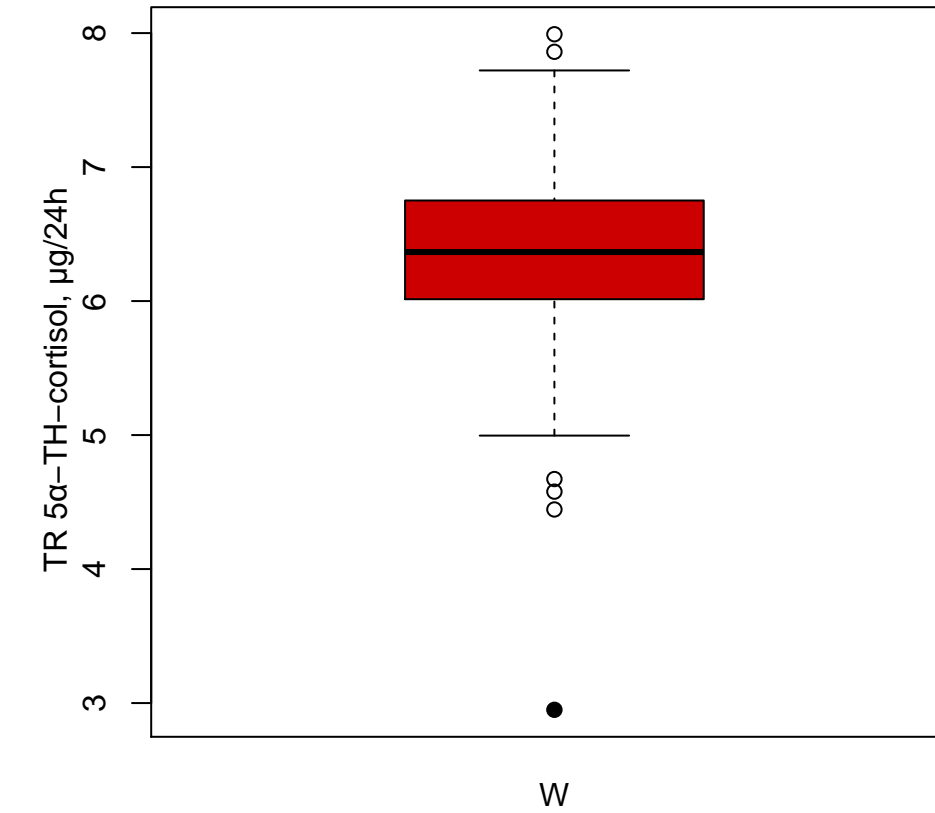

(e) D vs N: delta= 0.89 p = 0

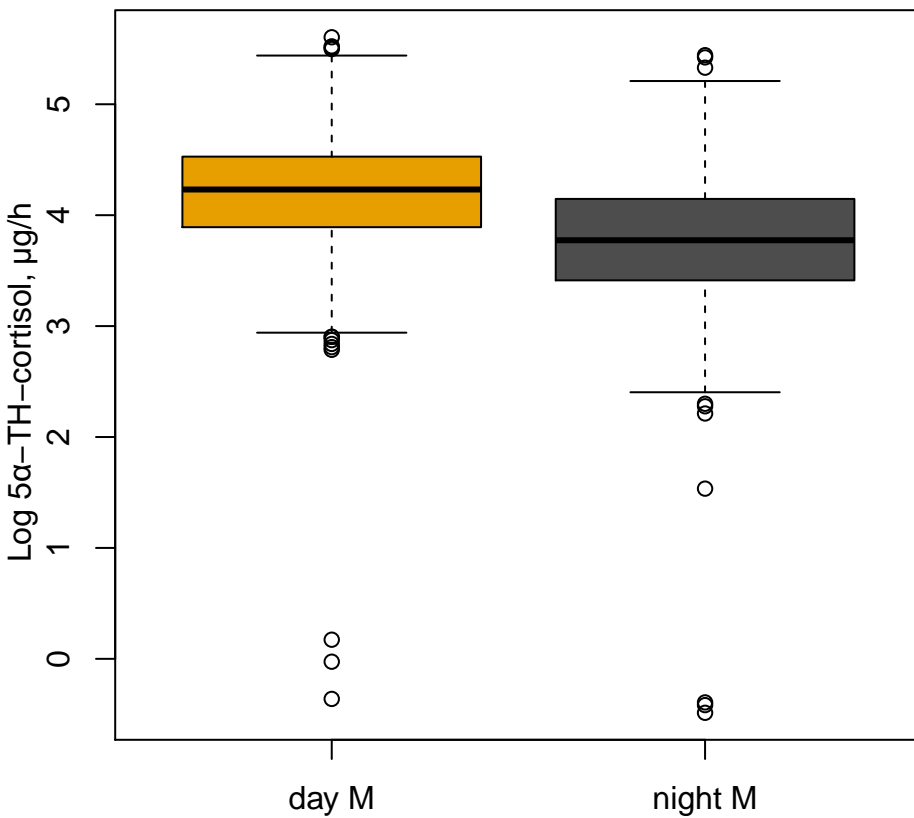

(f) D vs N: delta= 0.84 p = 0

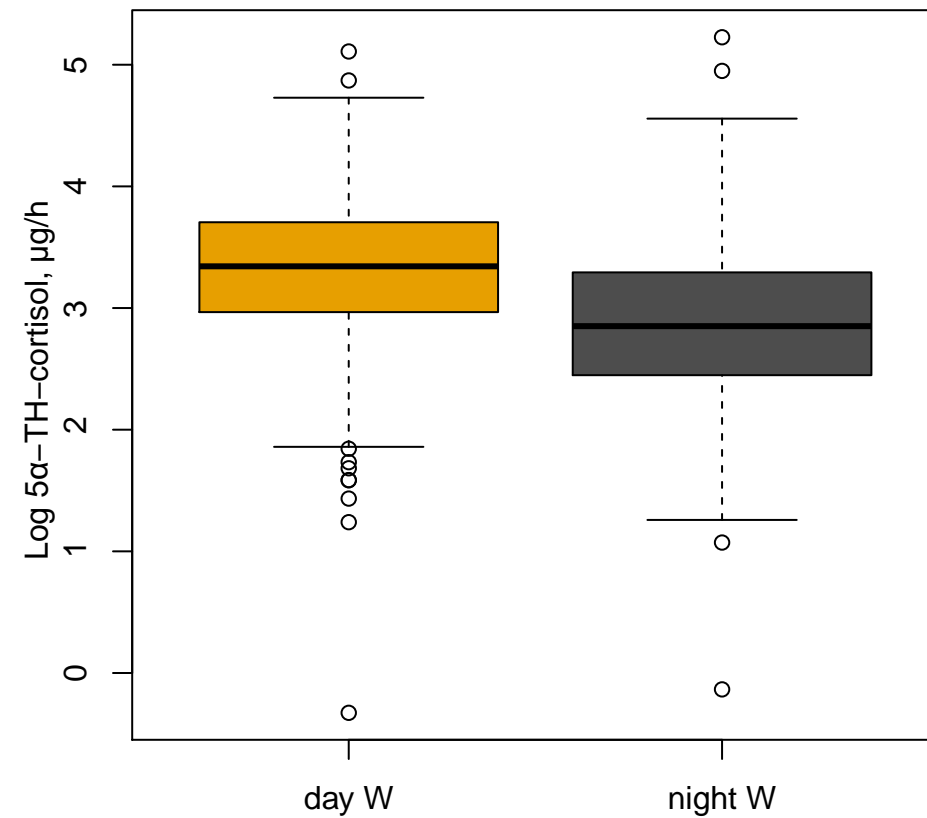

(g) M : rho= 0.645 n= 379

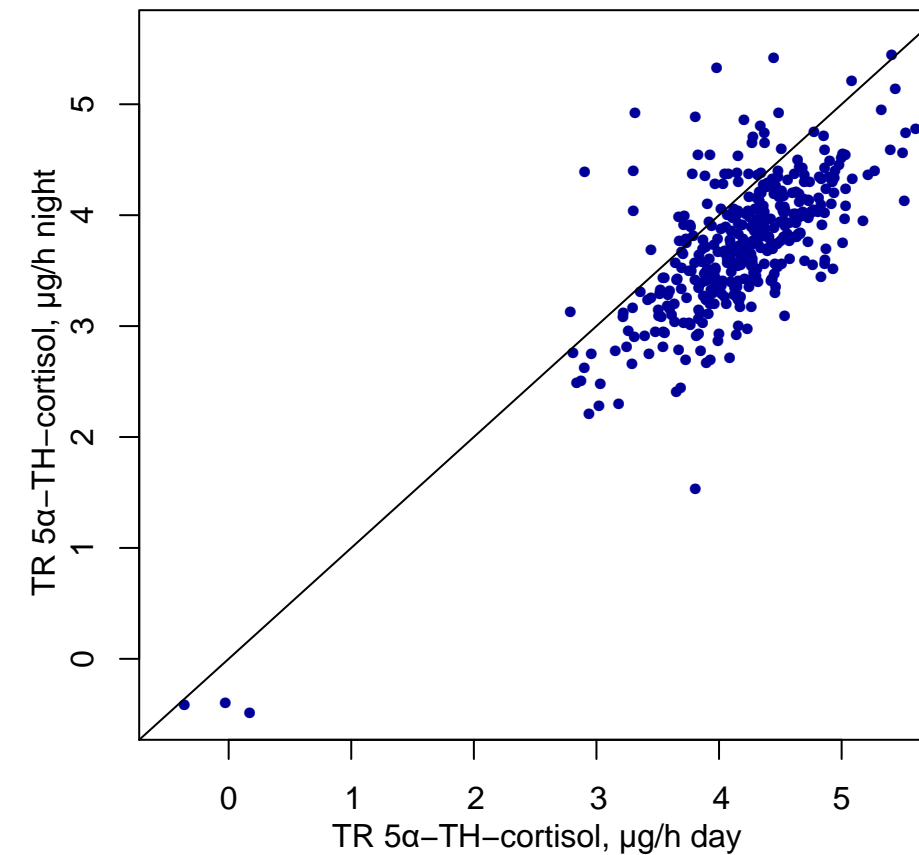

(h) W : rho= 0.784 n= 362

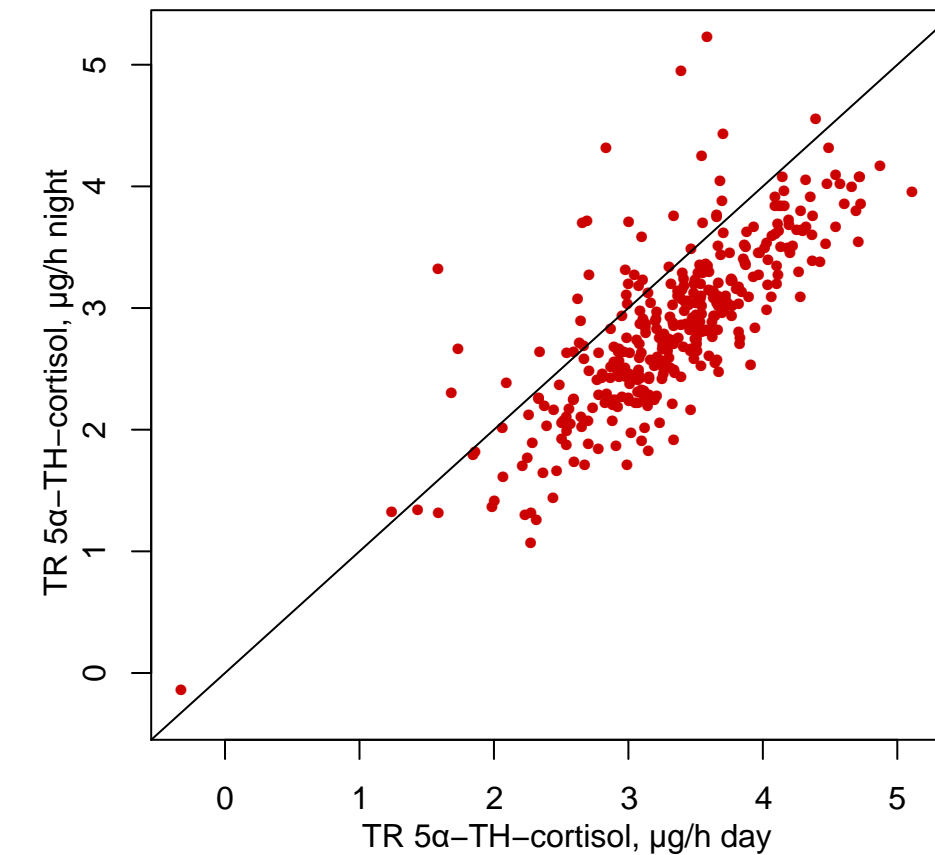

(a) M vs W:  $\delta = 0.44$   $p = 0$

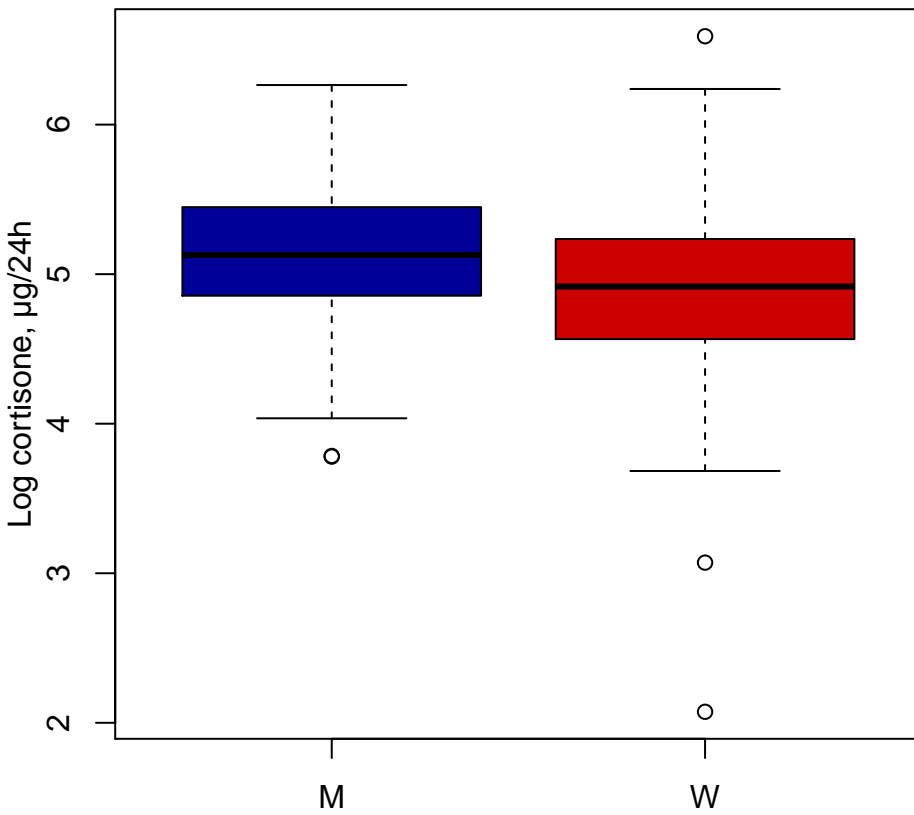

(b) M:  $p = 0.801$  W:  $p = 0.005$

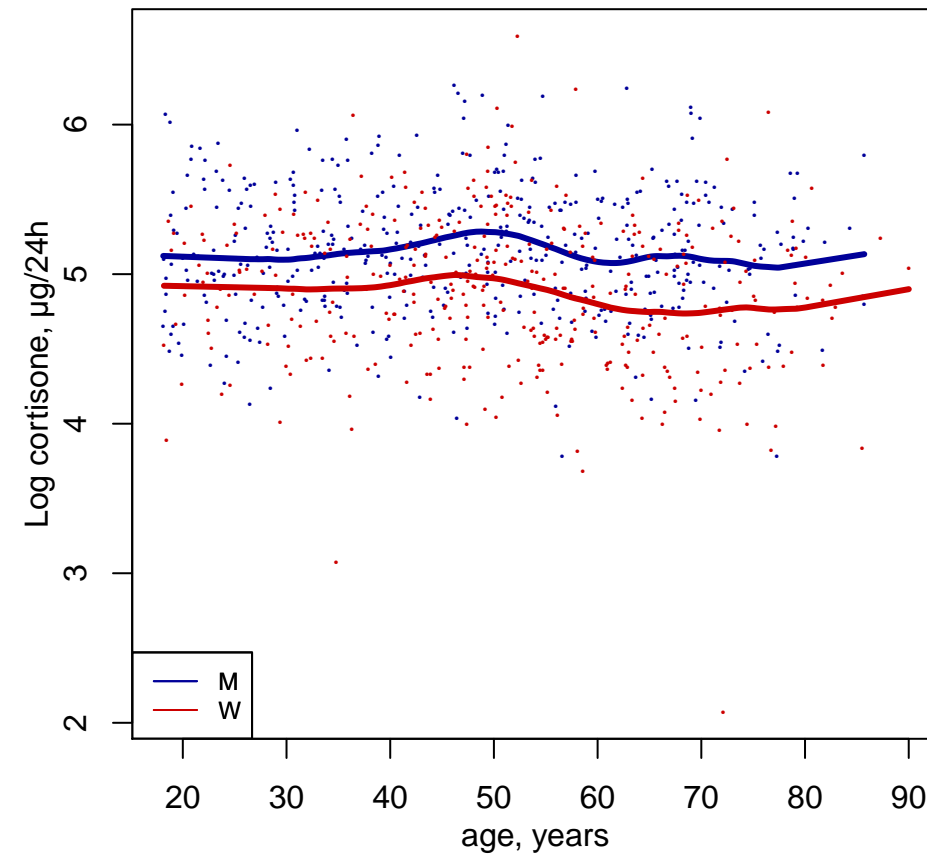

(c) TR= 0 nout= 0 sk= 0 ku= 0.07

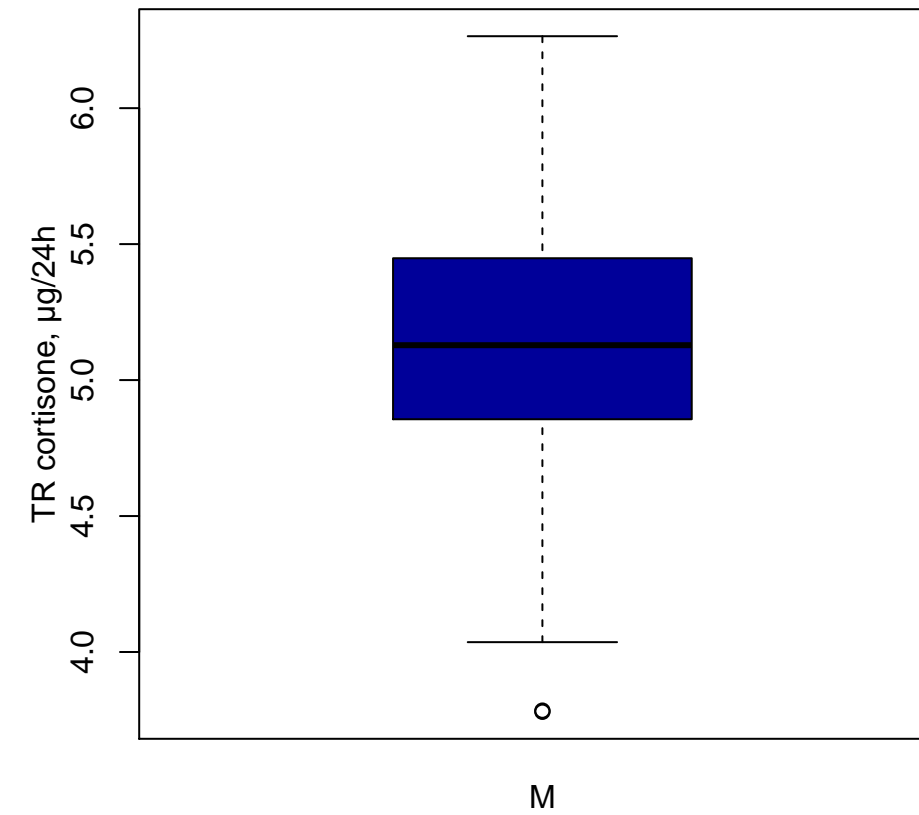

(d) TR= 0 nout= 1 sk= -0.07 ku= 0.07

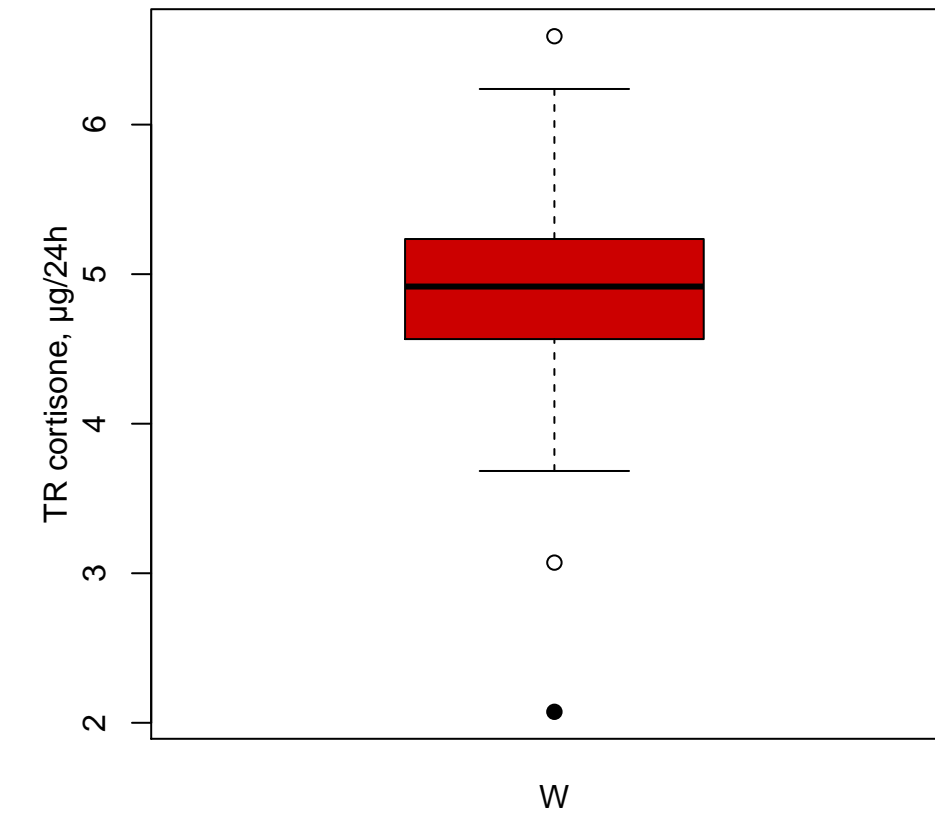

(e) D vs N:  $\delta = 0.4$   $p = 0$

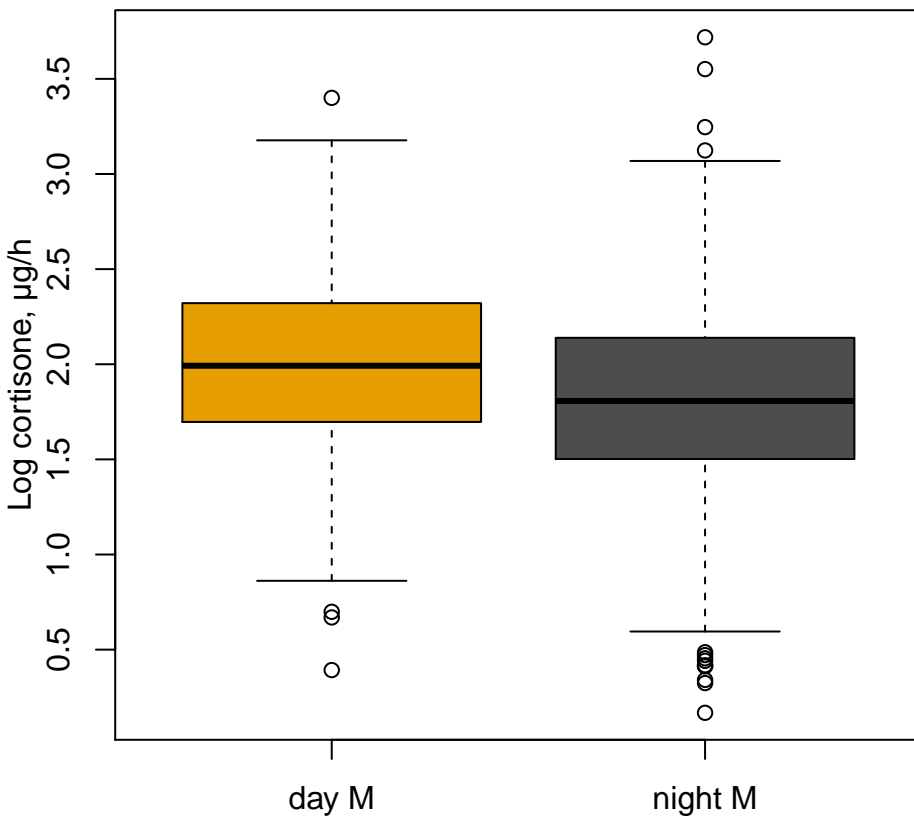

(f) D vs N:  $\delta = 0.53$   $p = 0$

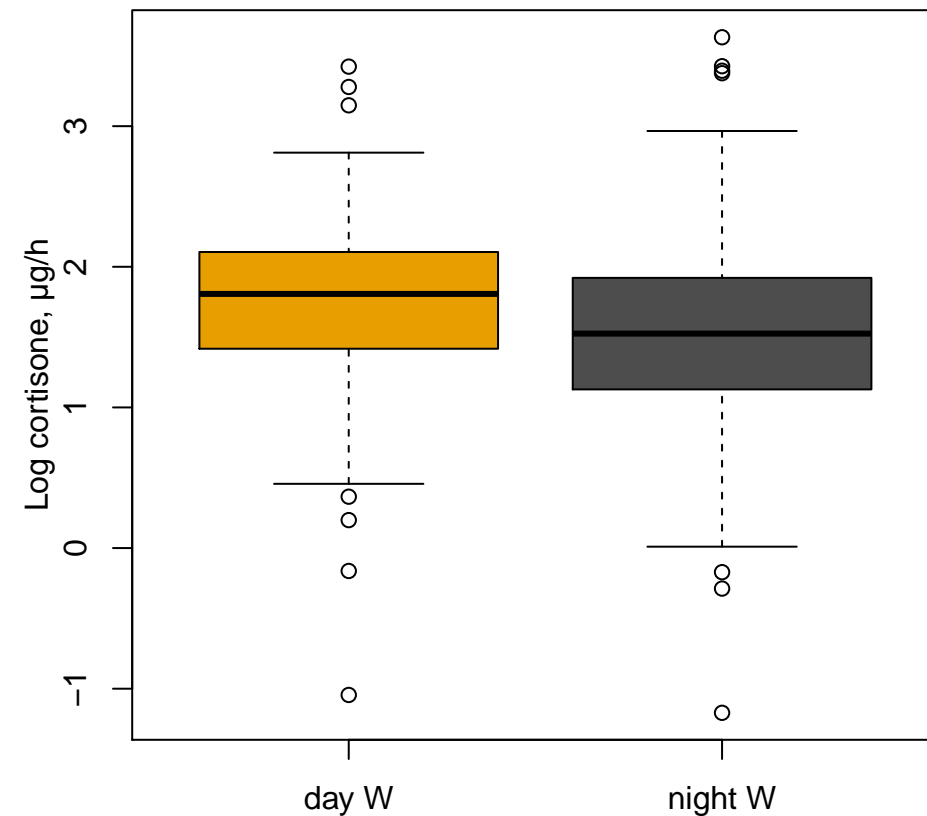

(g) M :  $\rho = 0.502$   $n = 454$

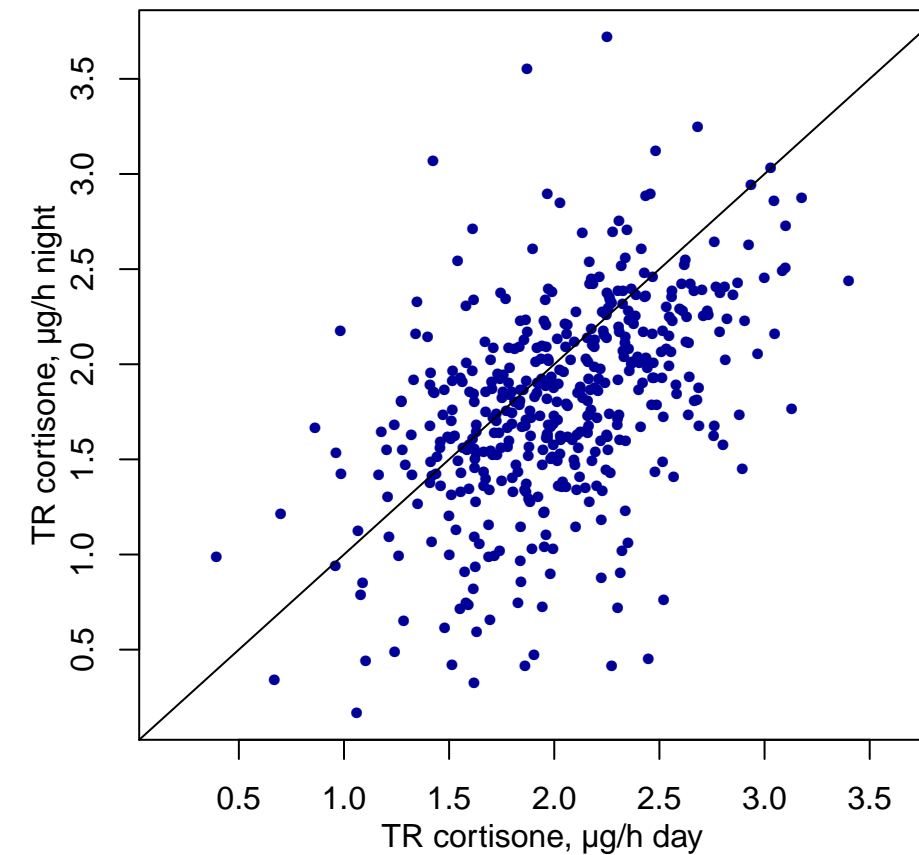

(h) W :  $\rho = 0.55$   $n = 379$

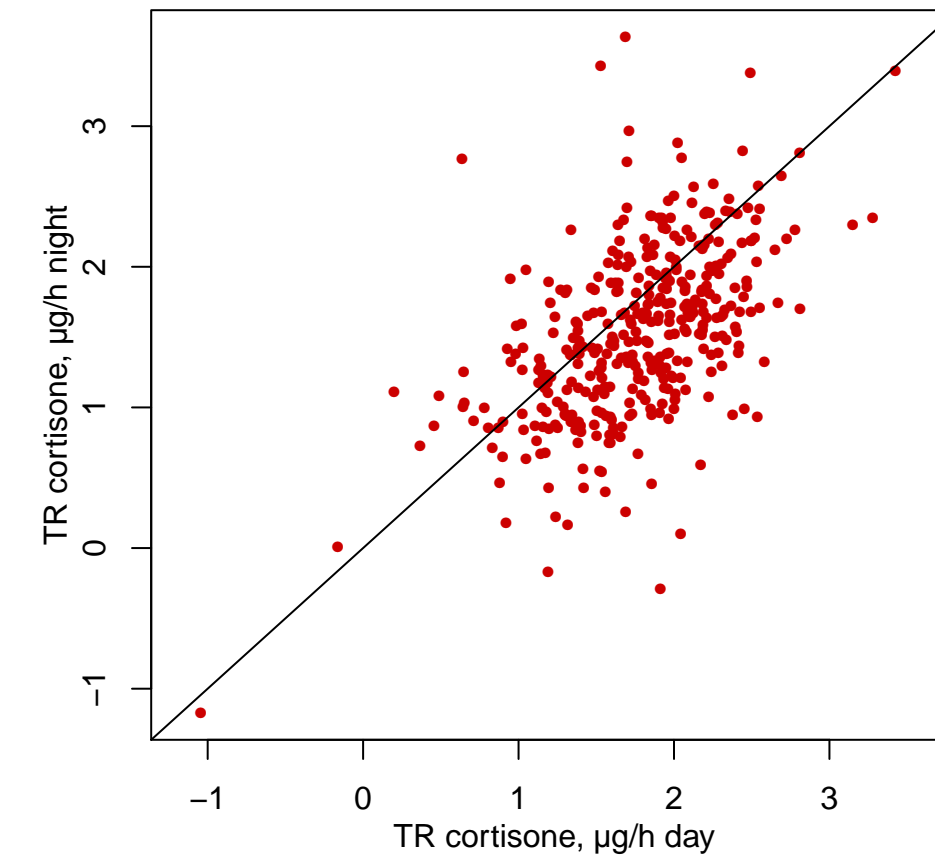

**(a) M vs W: delta= 0.85 p = 0**

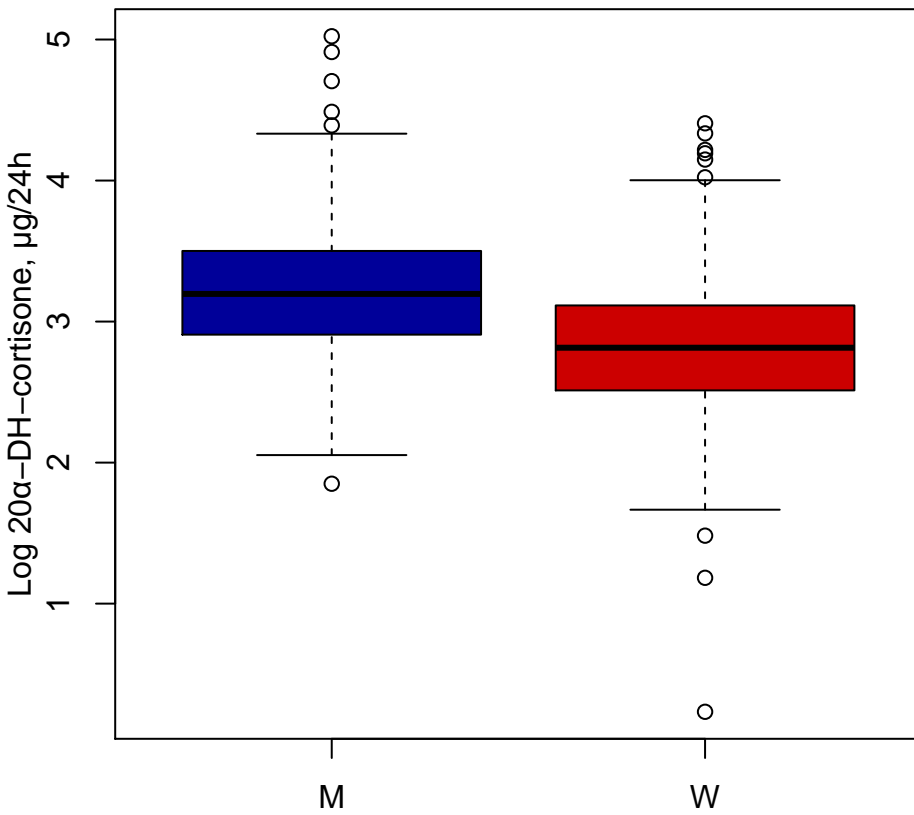

**(b) M: p = 0.189 W: p = 0**

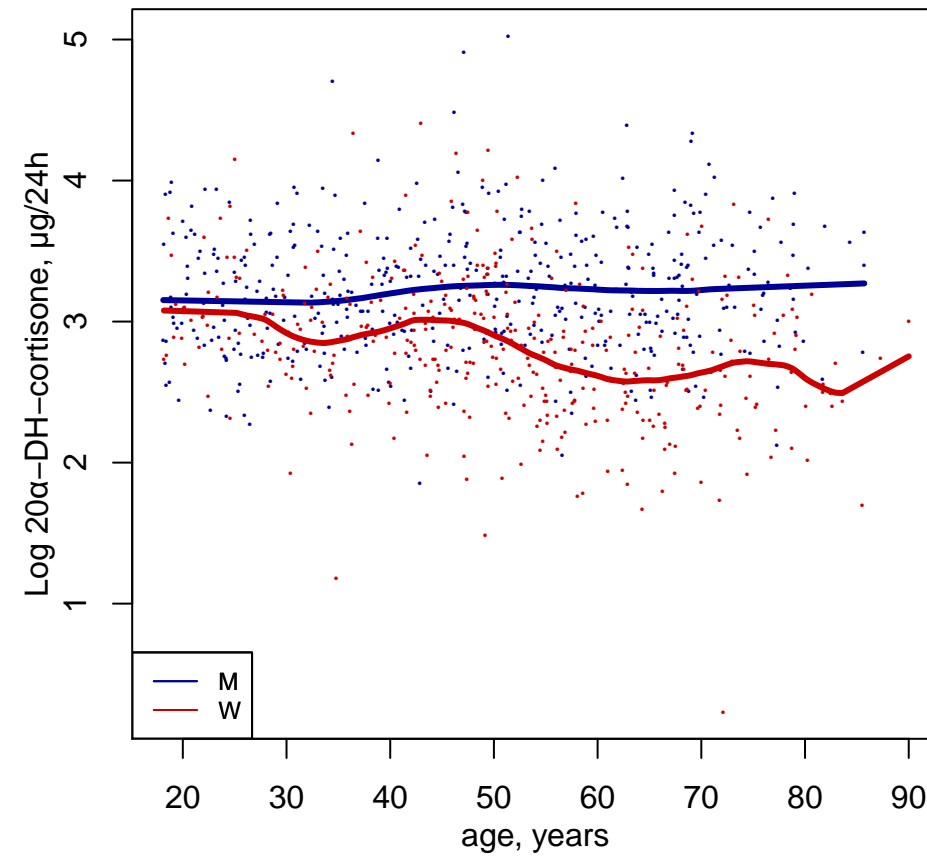

**(c) TR= -0.2 nout= 0 sk= 0.02 ku= 0.31**

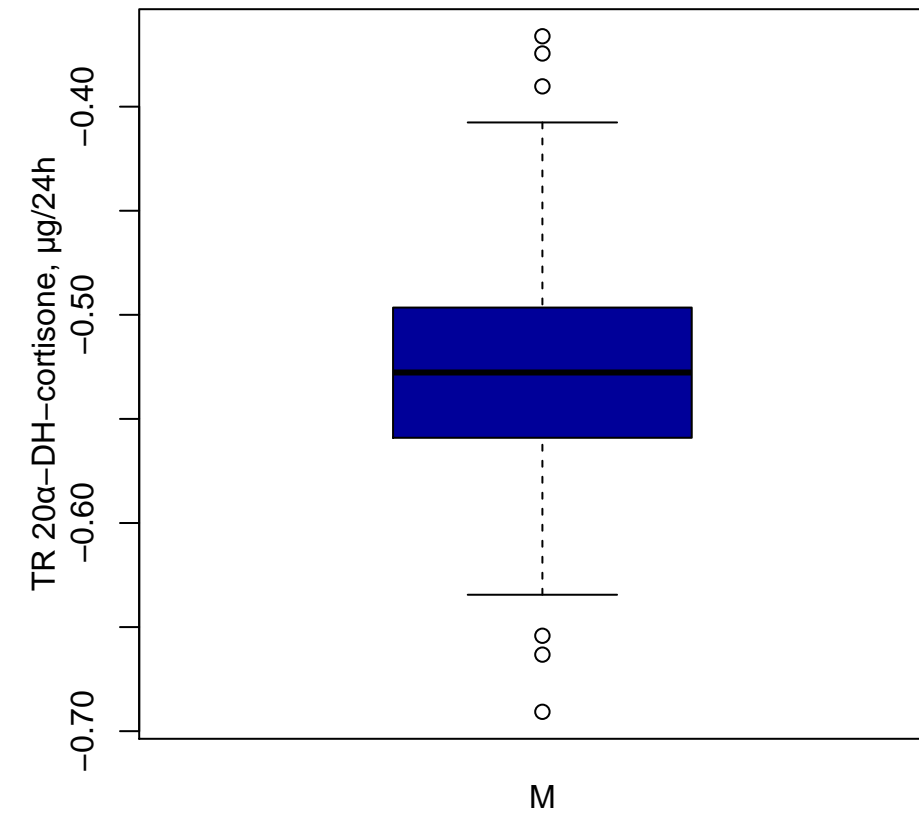

**(d) TR= -0.1 nout= 2 sk= 0.06 ku= 0.31**

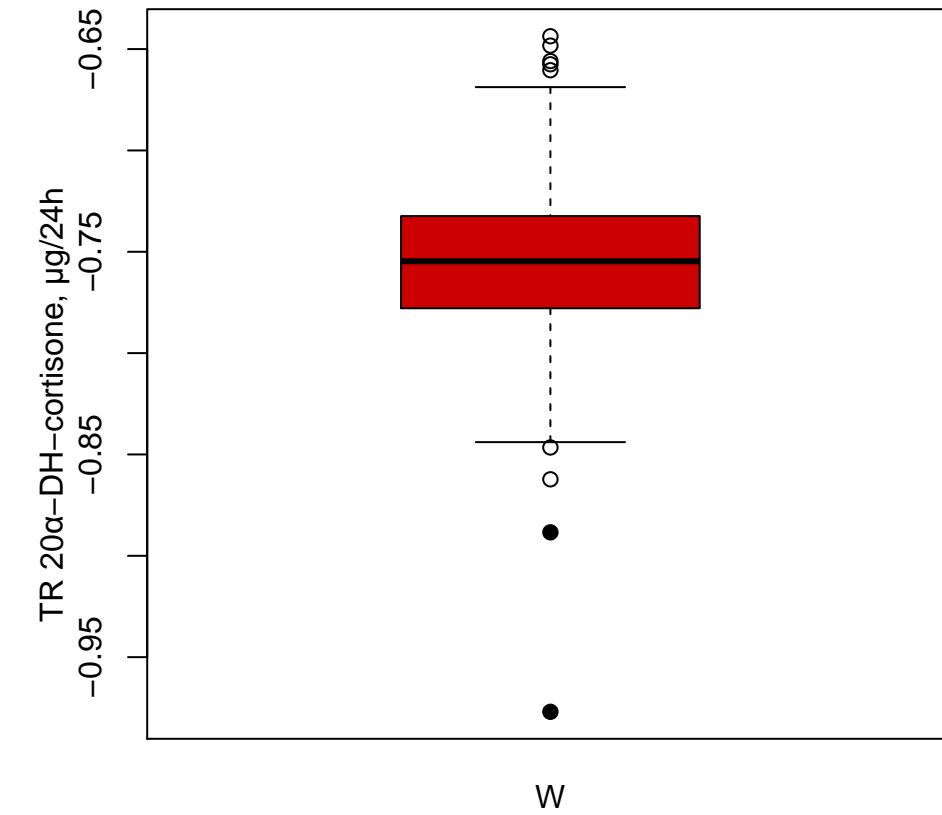

**(e) D vs N: delta= 0.89 p = 0**

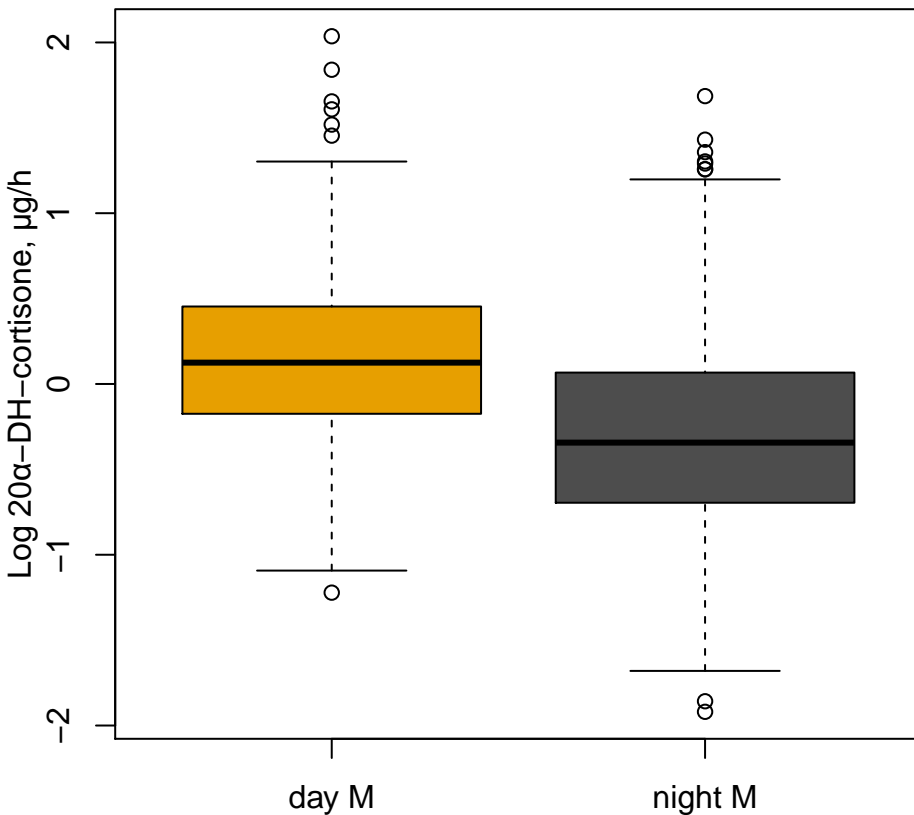

**(f) D vs N: delta= 1.09 p = 0**

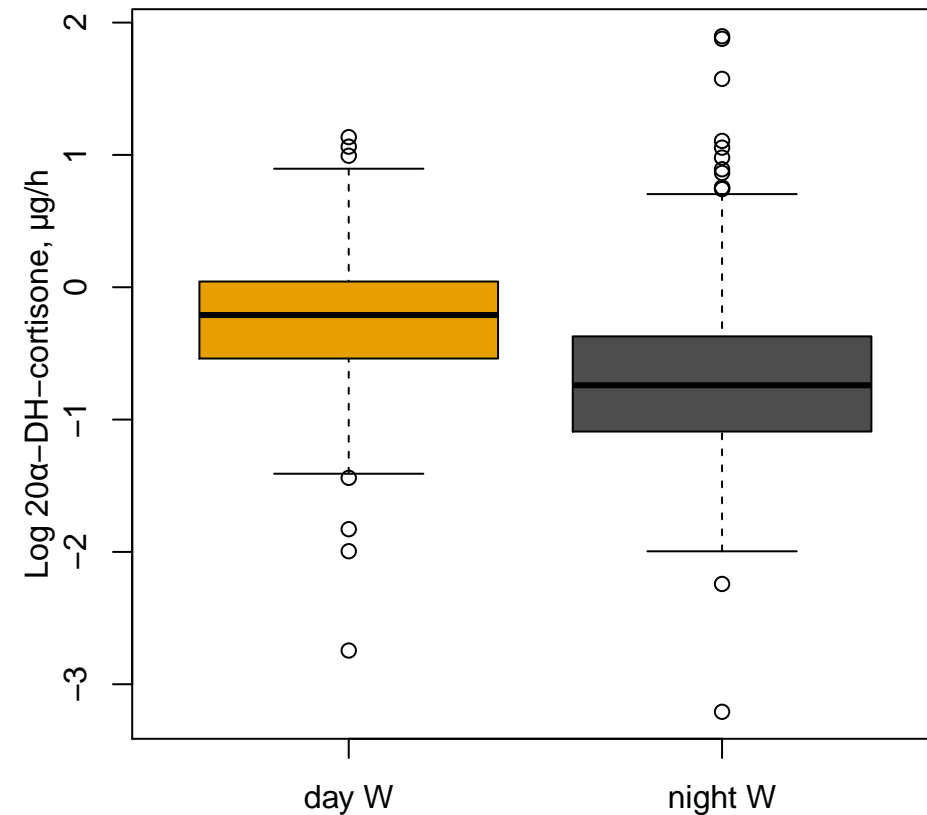

**(g) M : rho= 0.523 n= 455**

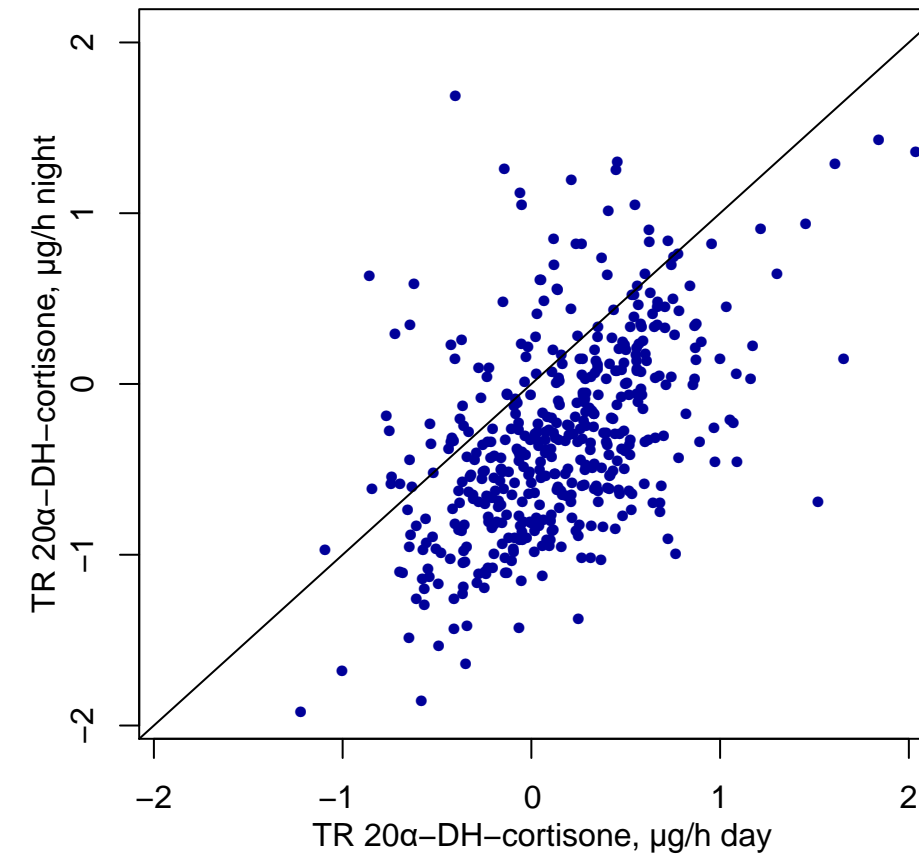

**(h) W : rho= 0.614 n= 379**

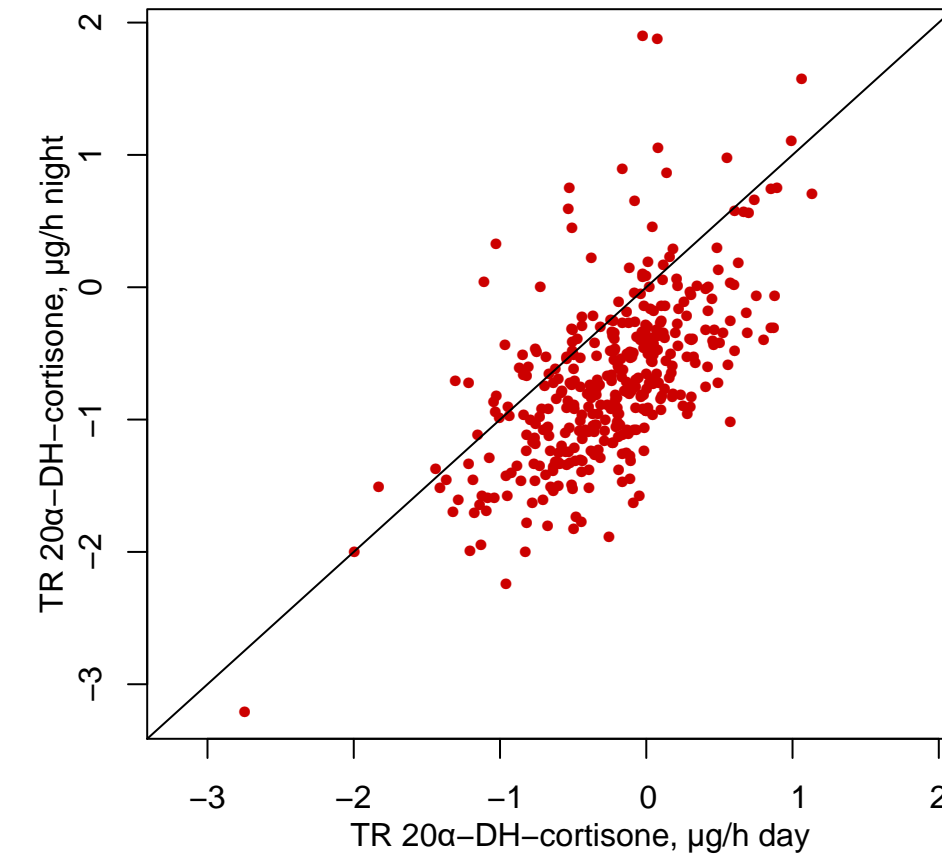

(a) M vs W: delta= 0.56 p = 0

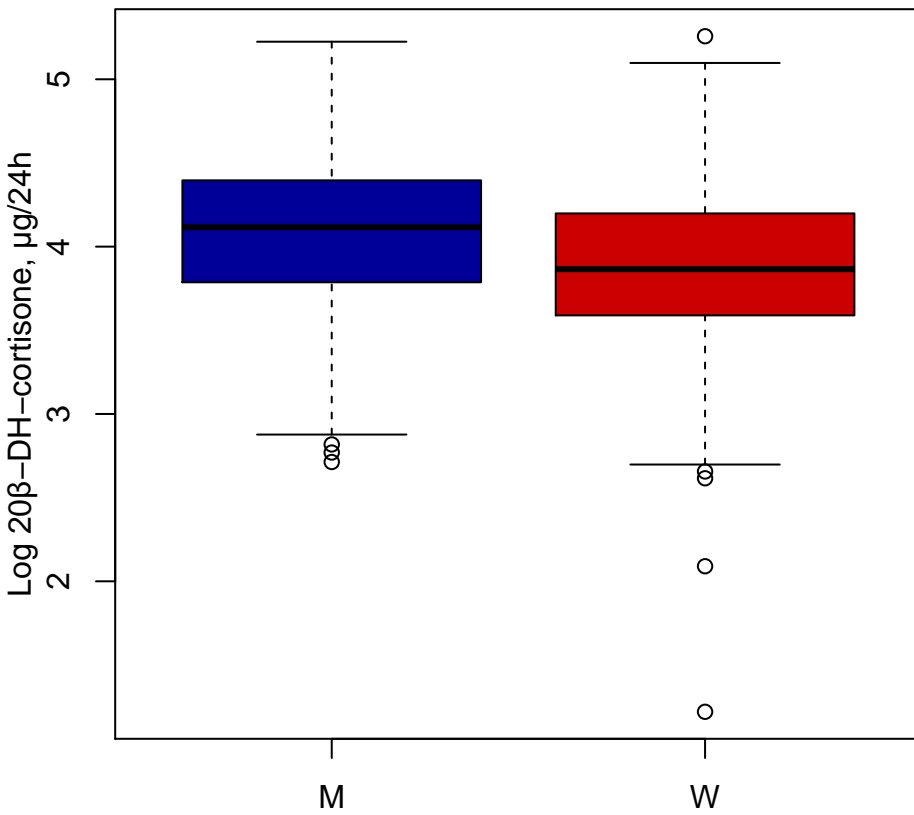

(b) M: p = 0.011 W: p = 0

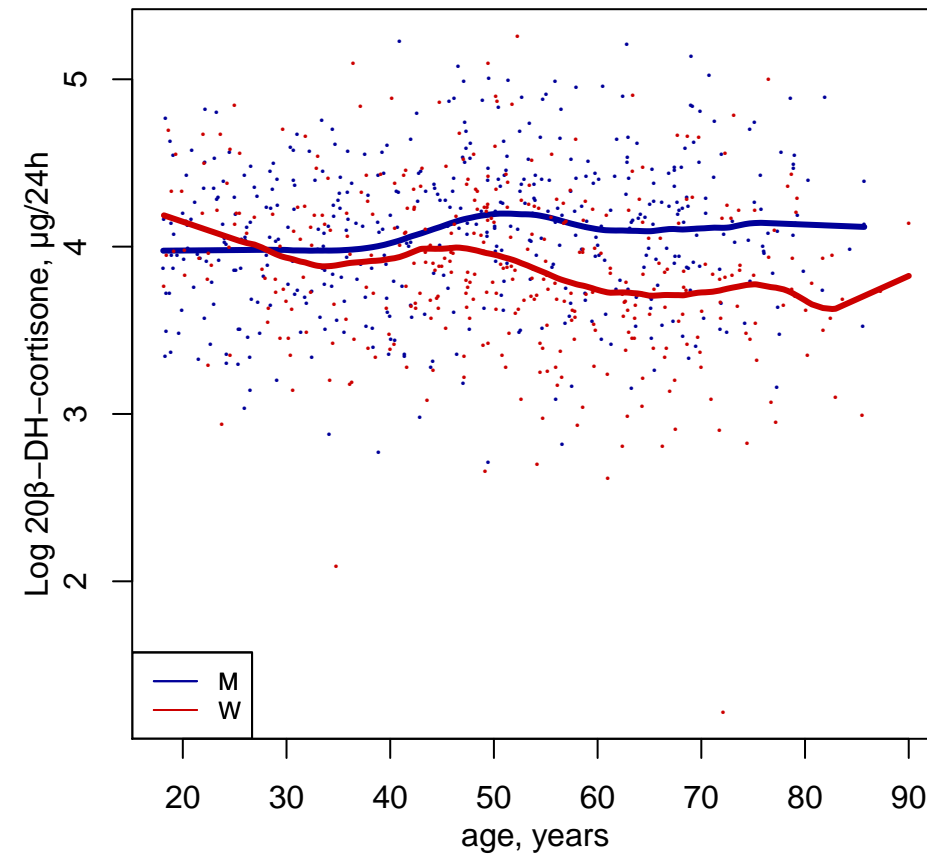

(c) TR= 0.1 nout= 0 sk= -0.05 ku= -0.14

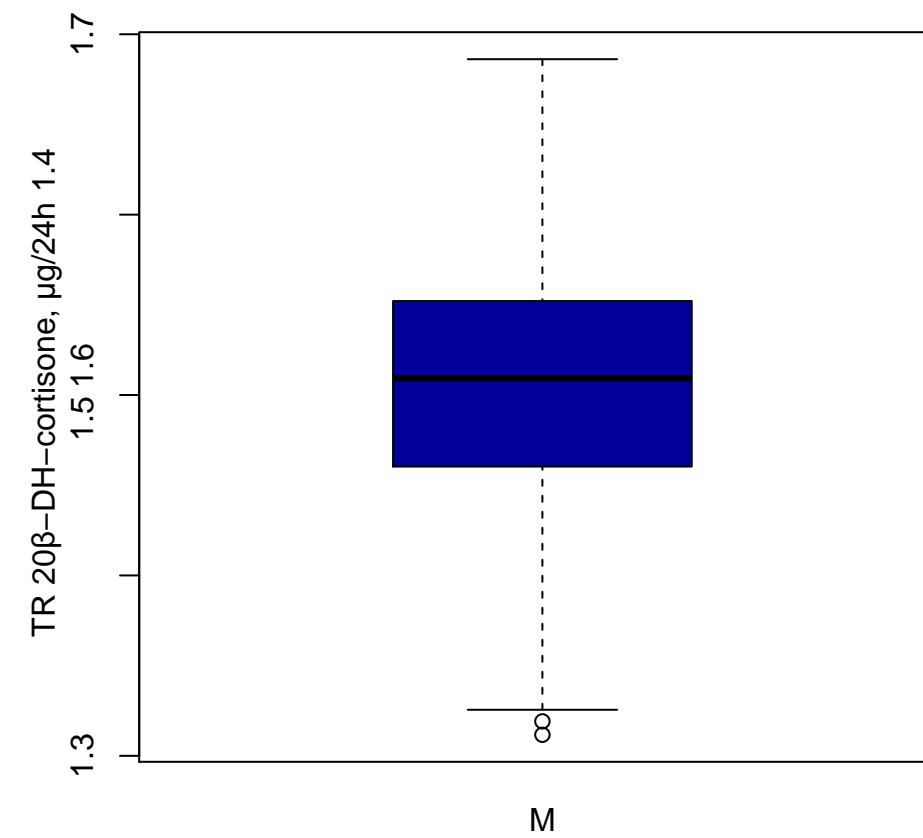

(d) TR= 0 nout= 2 sk= 0.01 ku= -0.14

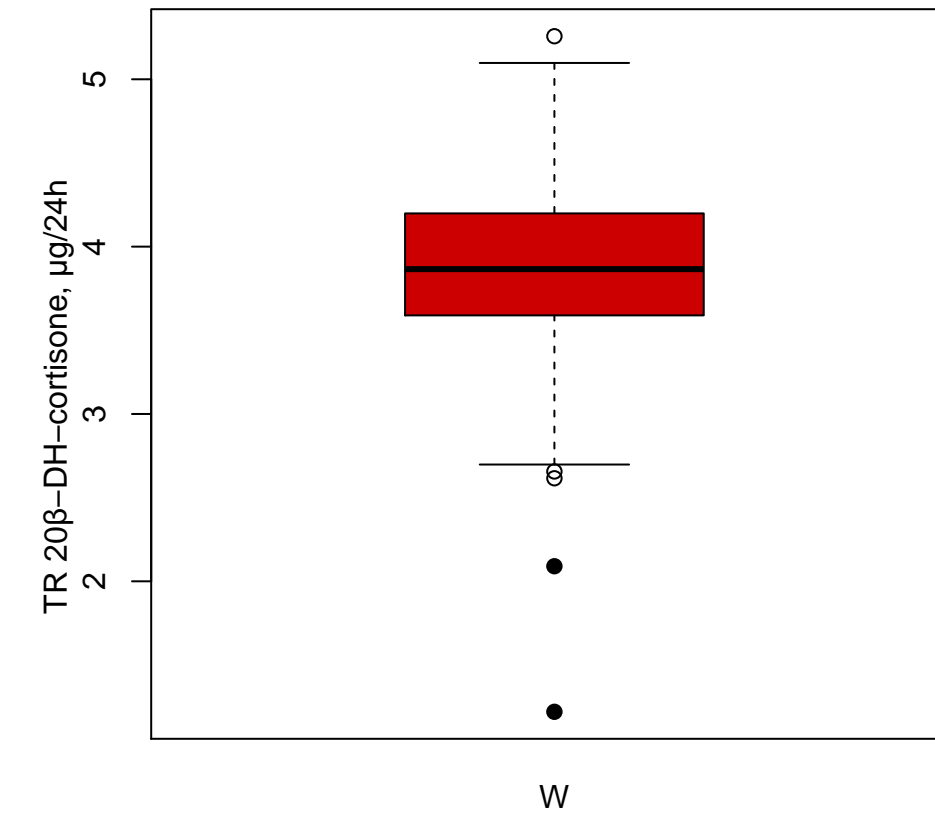

(e) D vs N: delta= 0.92 p = 0

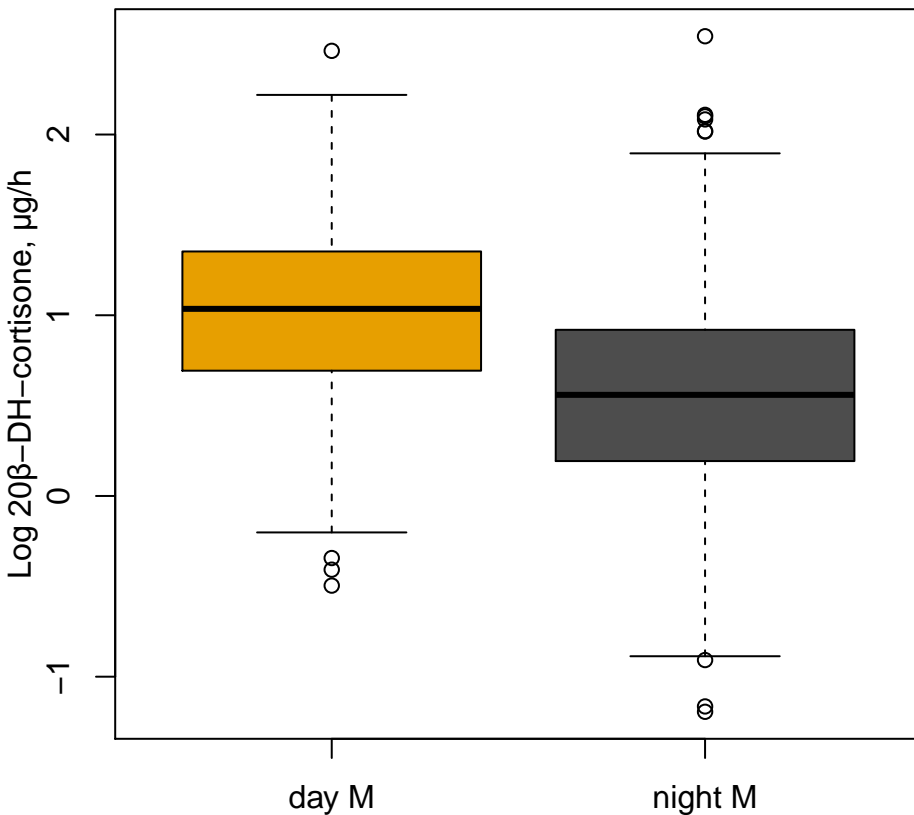

(f) D vs N: delta= 0.79 p = 0

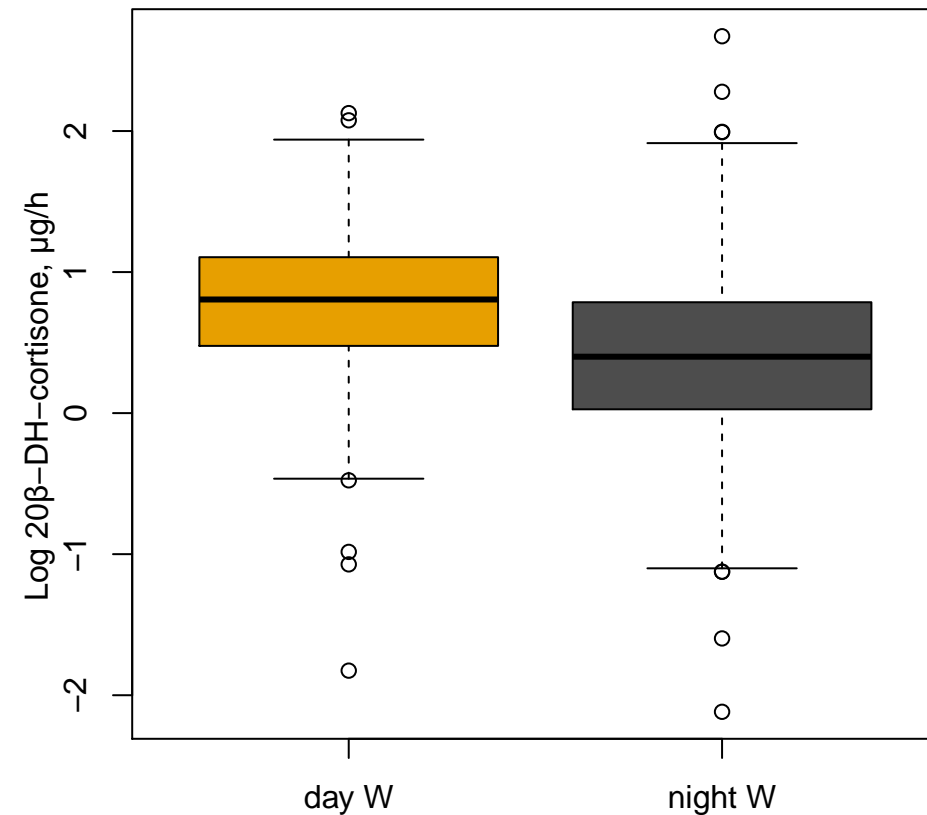

(g) M : rho= 0.522 n= 455

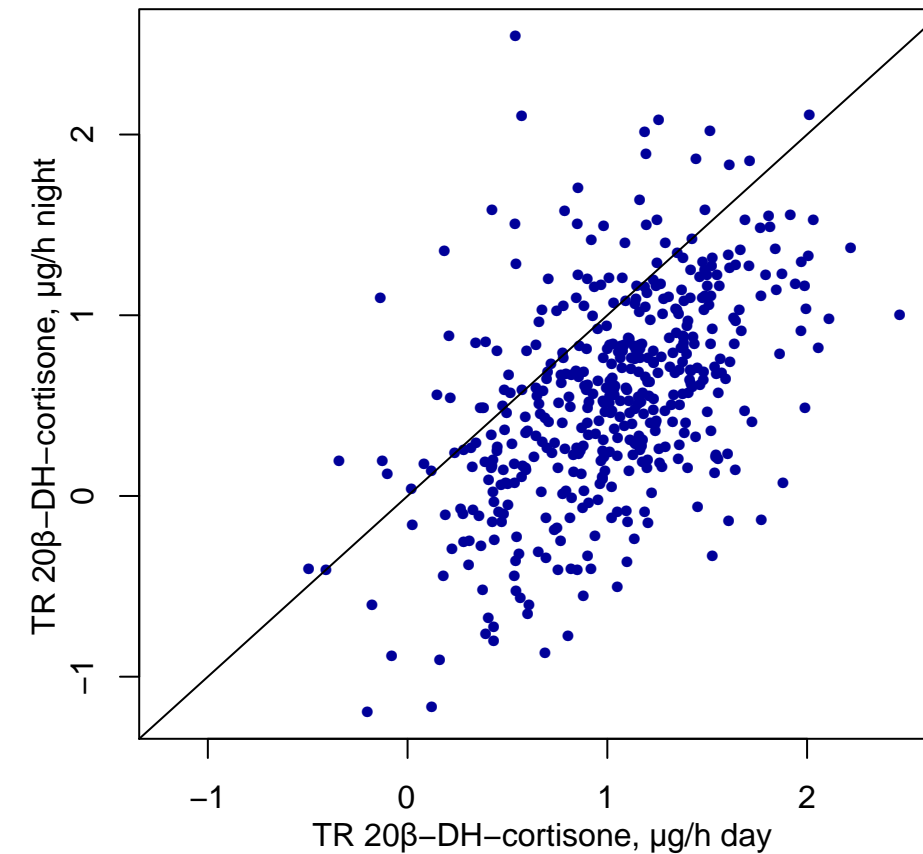

(h) W : rho= 0.567 n= 379

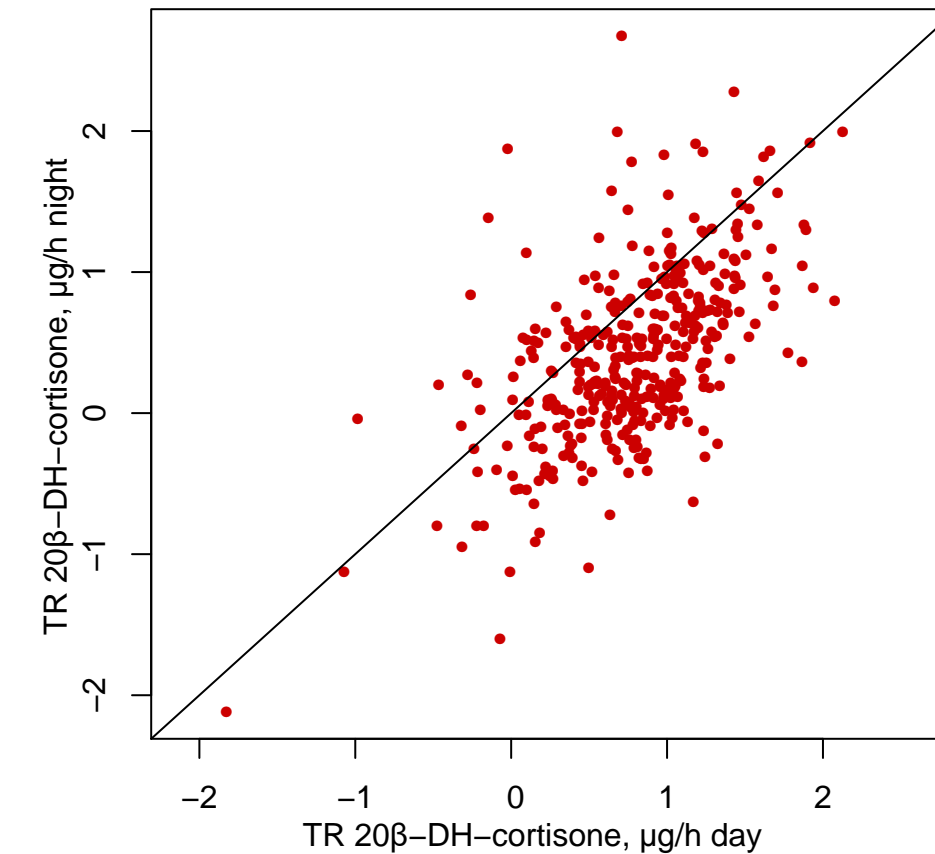

(a) M vs W: delta= 1.11 p = 0

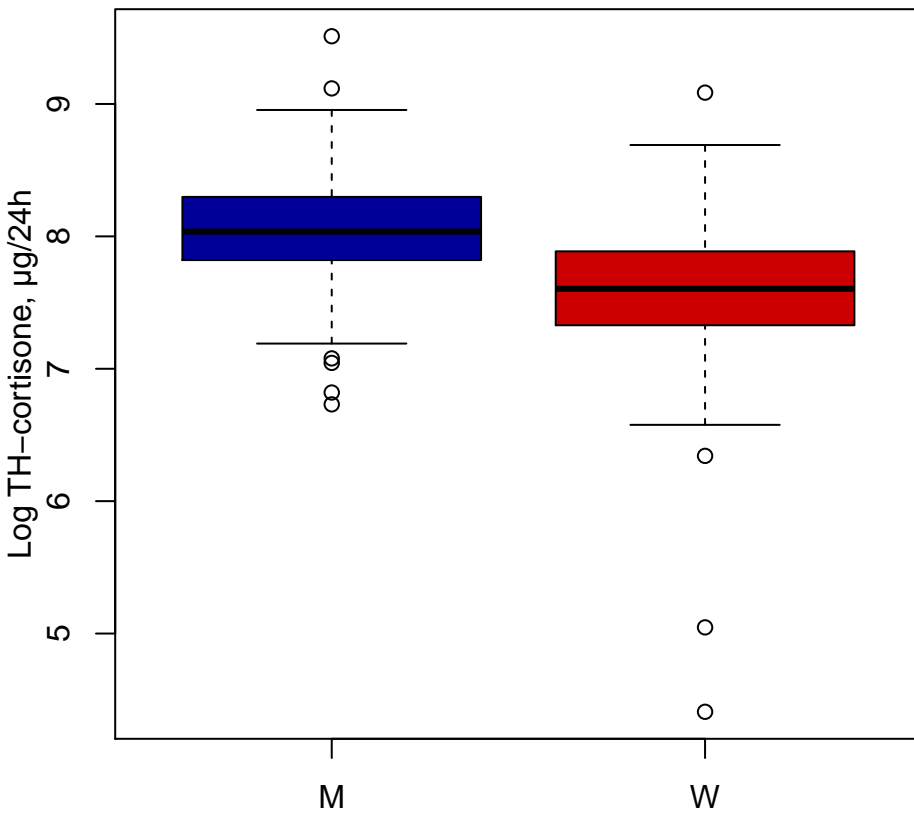

(b) M: p = 0 W: p = 0.138

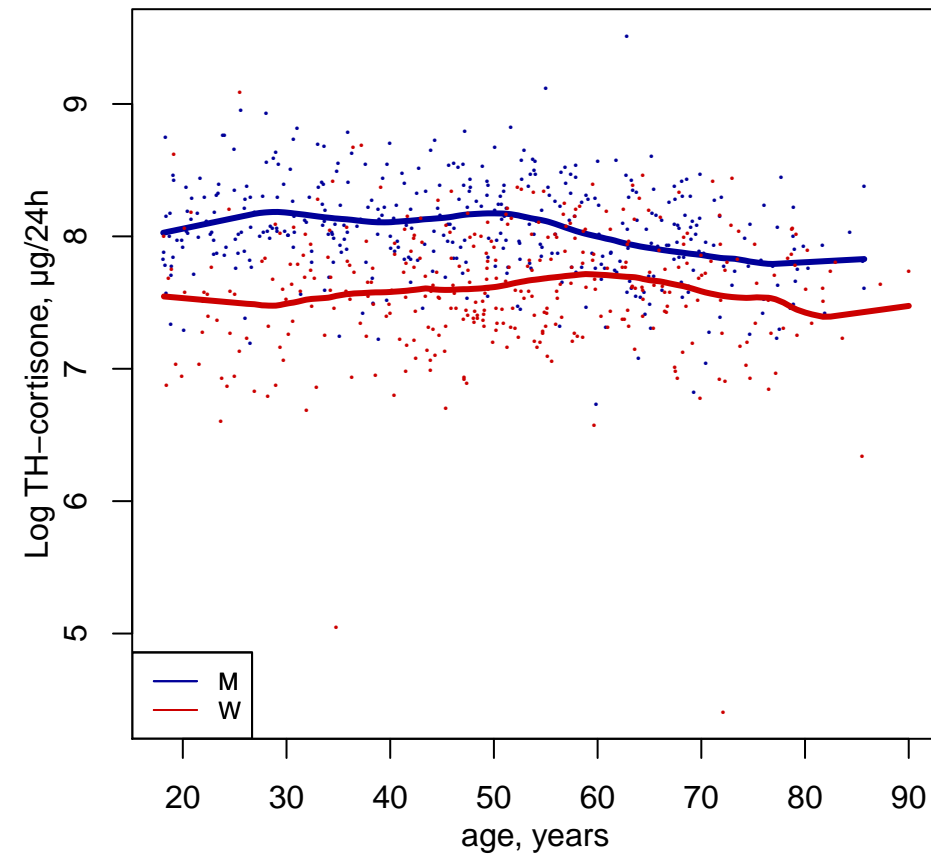

(c) TR= 0.2 nout= 1 sk= 0.02 ku= 0.14

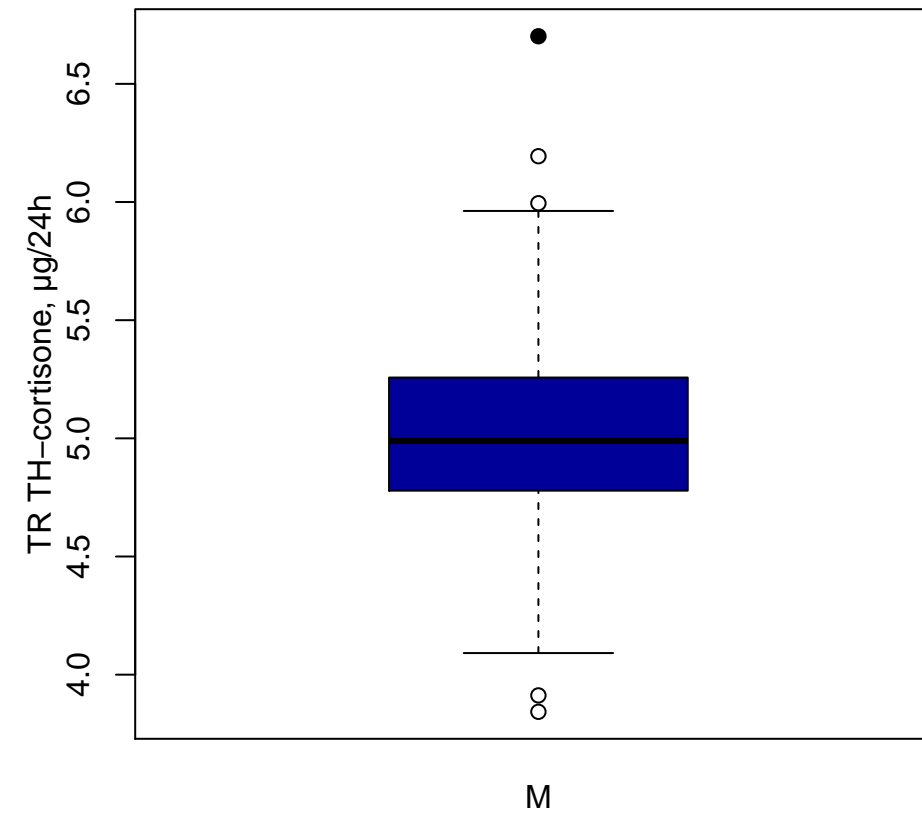

(d) TR= 0 nout= 2 sk= 0.01 ku= 0.14

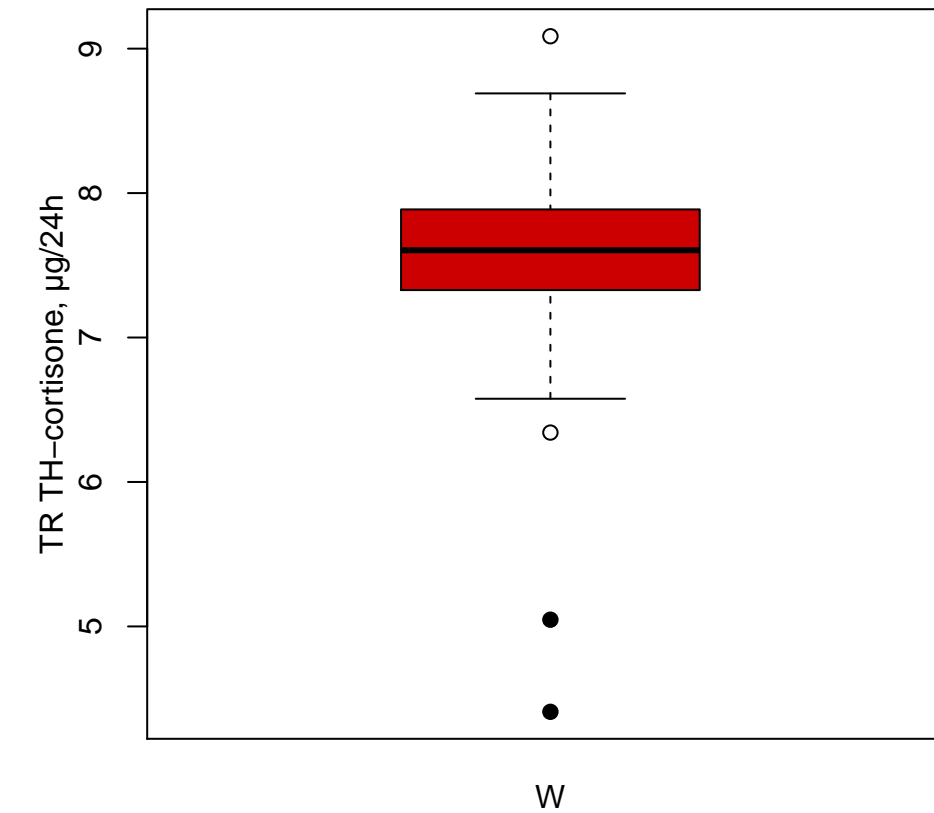

(e) D vs N: delta= 1.07 p = 0

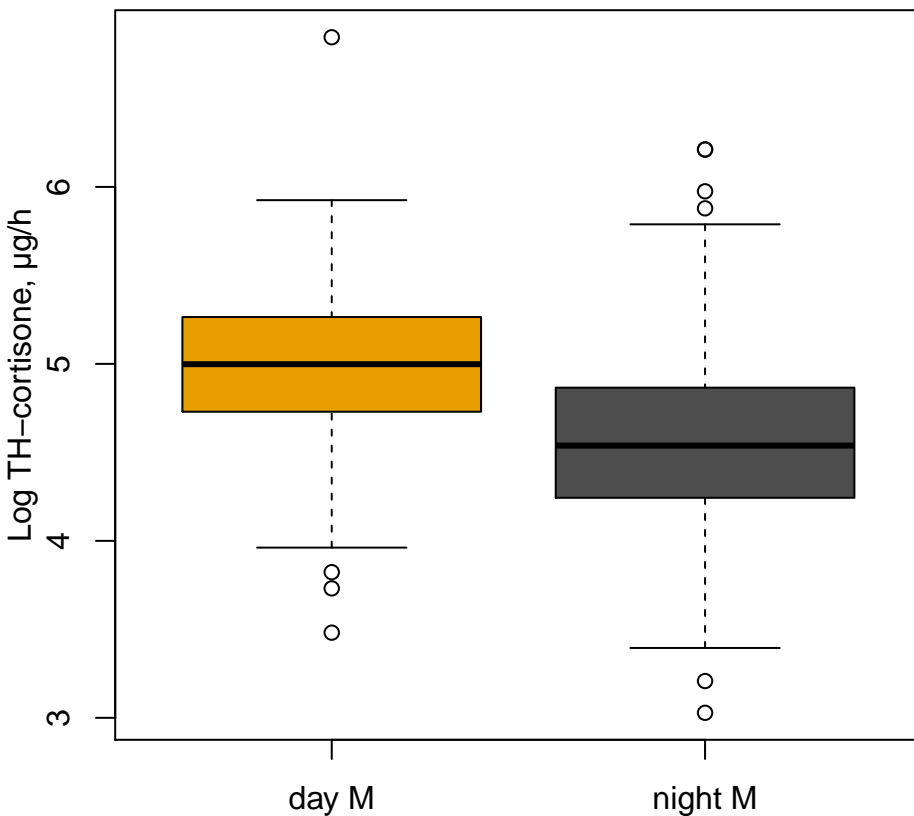

(f) D vs N: delta= 0.87 p = 0

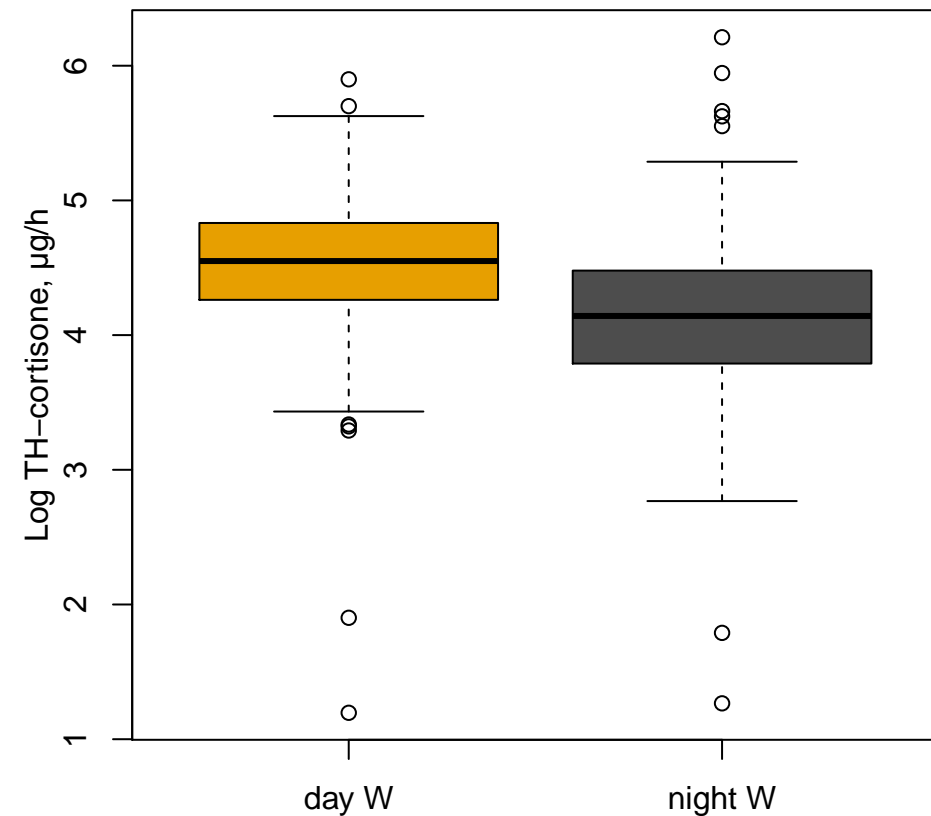

(g) M : rho= 0.495 n= 405

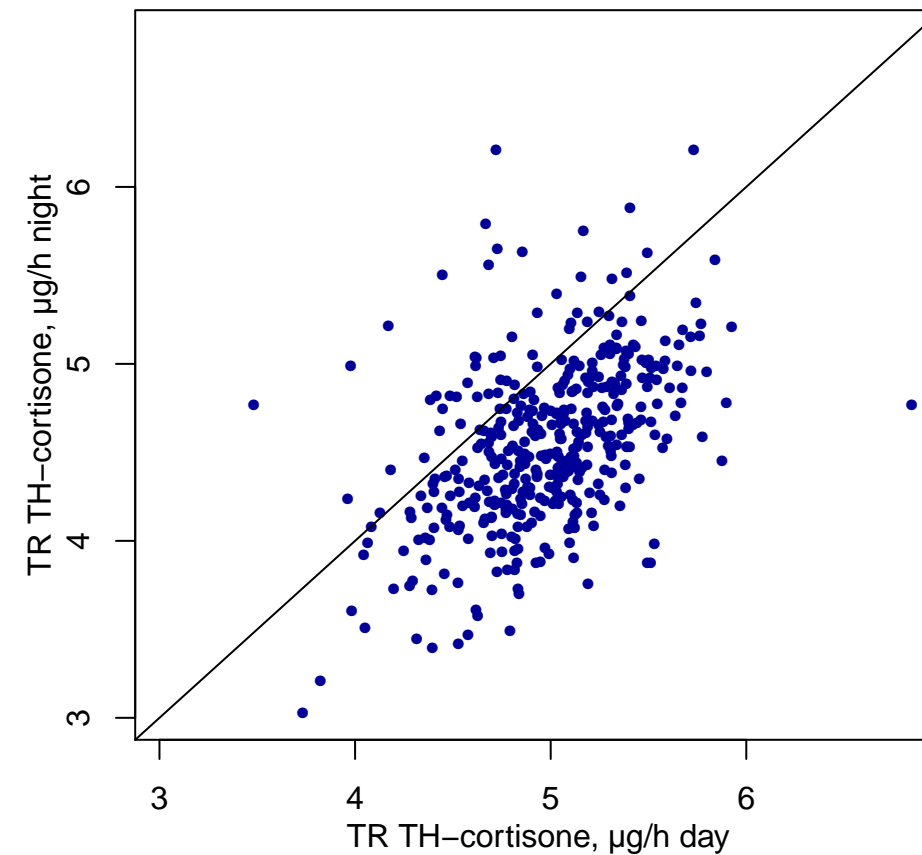

(h) W : rho= 0.609 n= 360

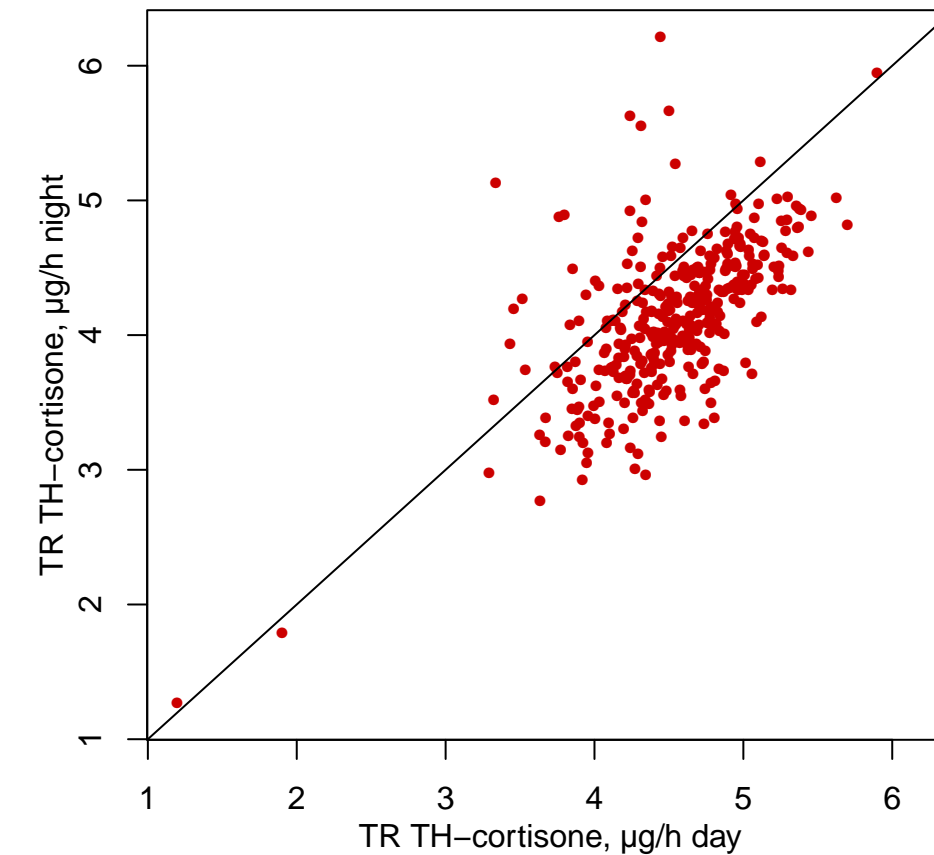

(a) M vs W: delta= 0.88 p = 0

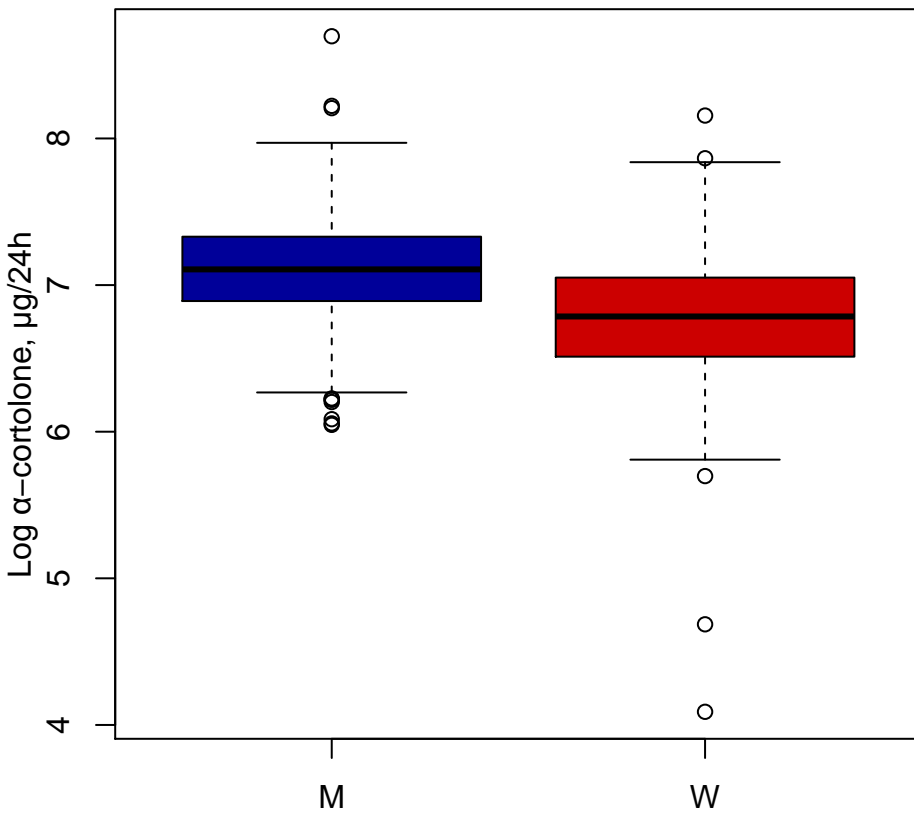

(b) M: p = 0.541 W: p = 0.757

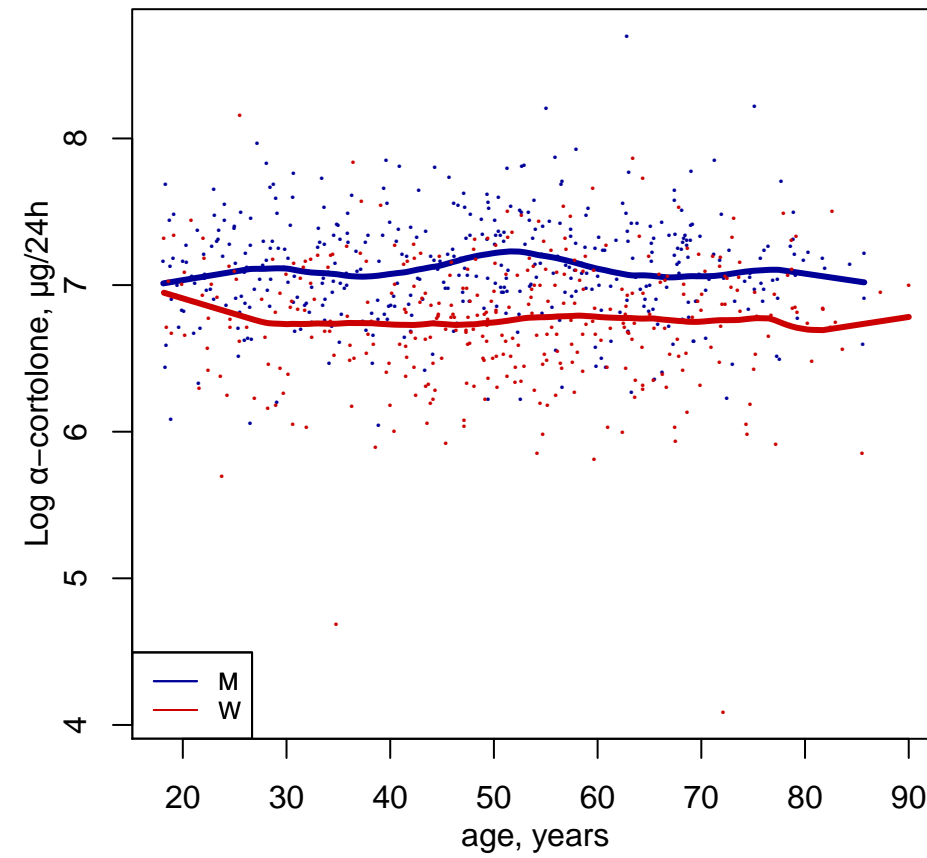

(c) TR= 0.1 nout= 1 sk= 0.03 ku= 0.39

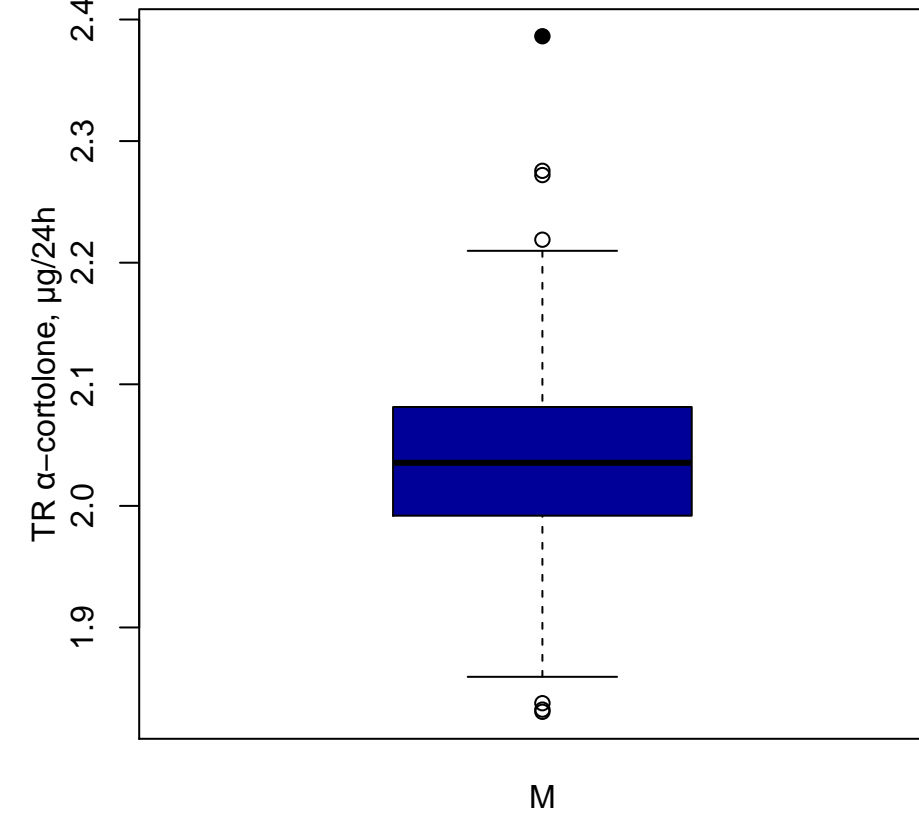

(d) TR= 0 nout= 2 sk= -0.03 ku= 0.39

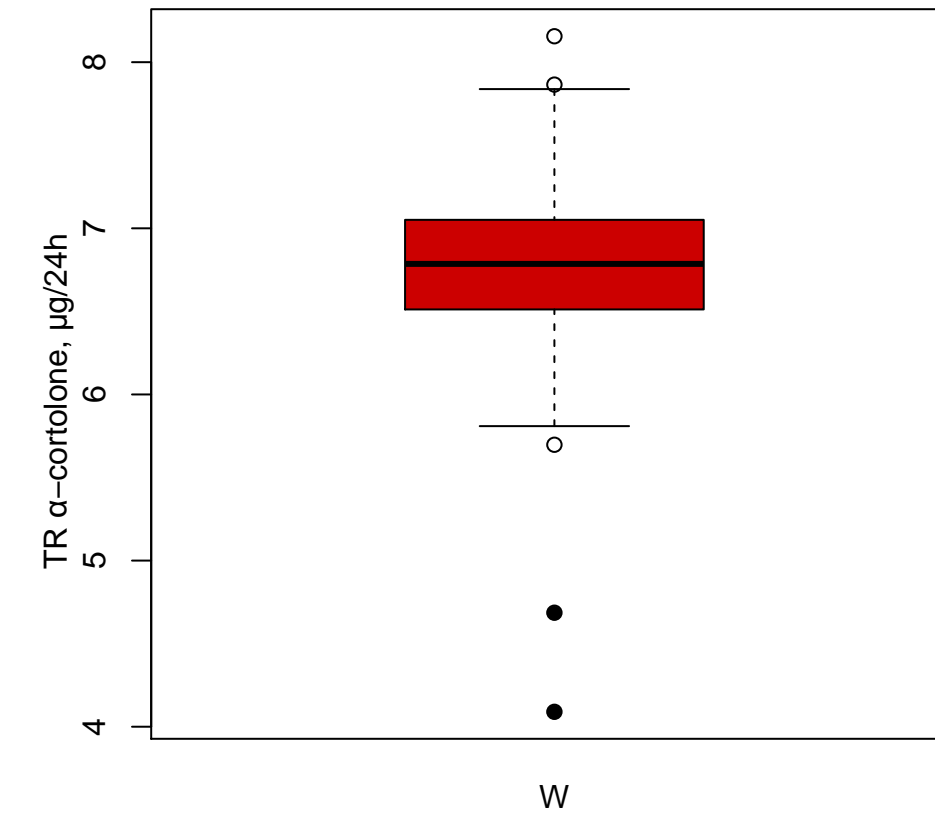

(e) D vs N: delta= 1.18 p = 0

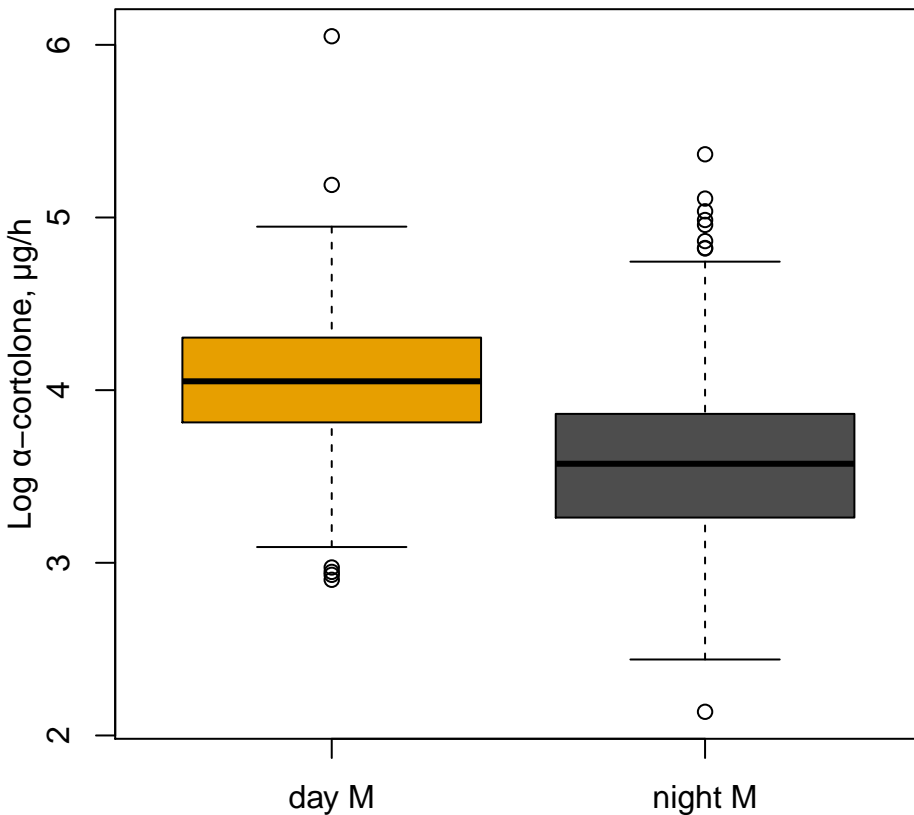

(f) D vs N: delta= 1.06 p = 0

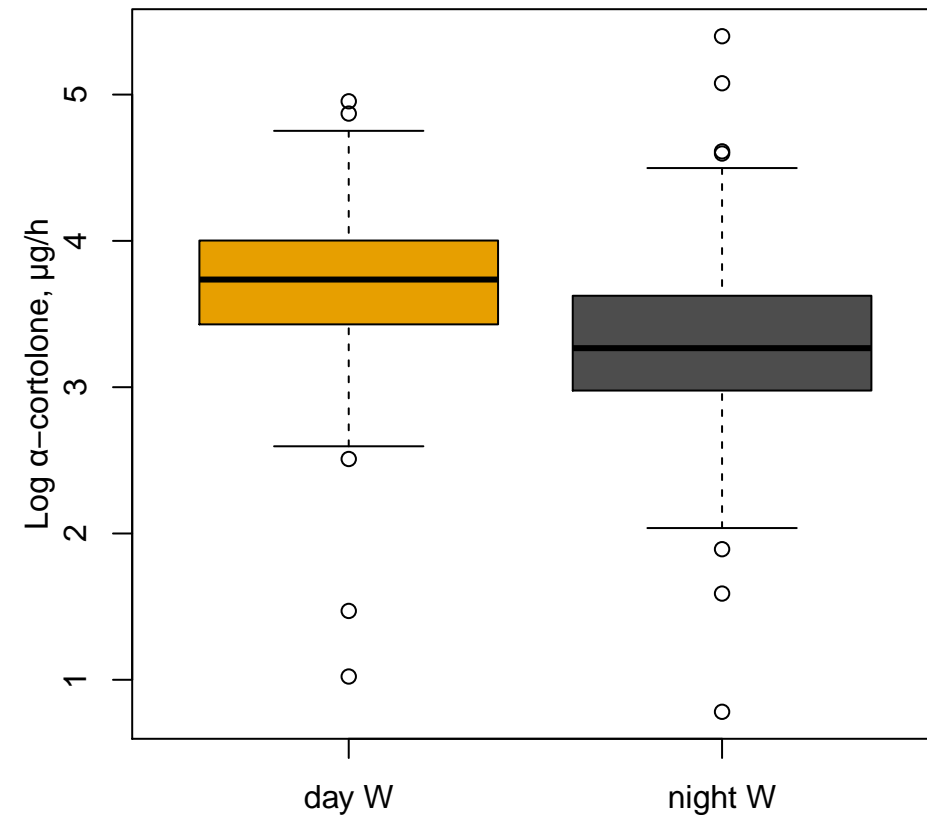

(g) M : rho= 0.446 n= 425

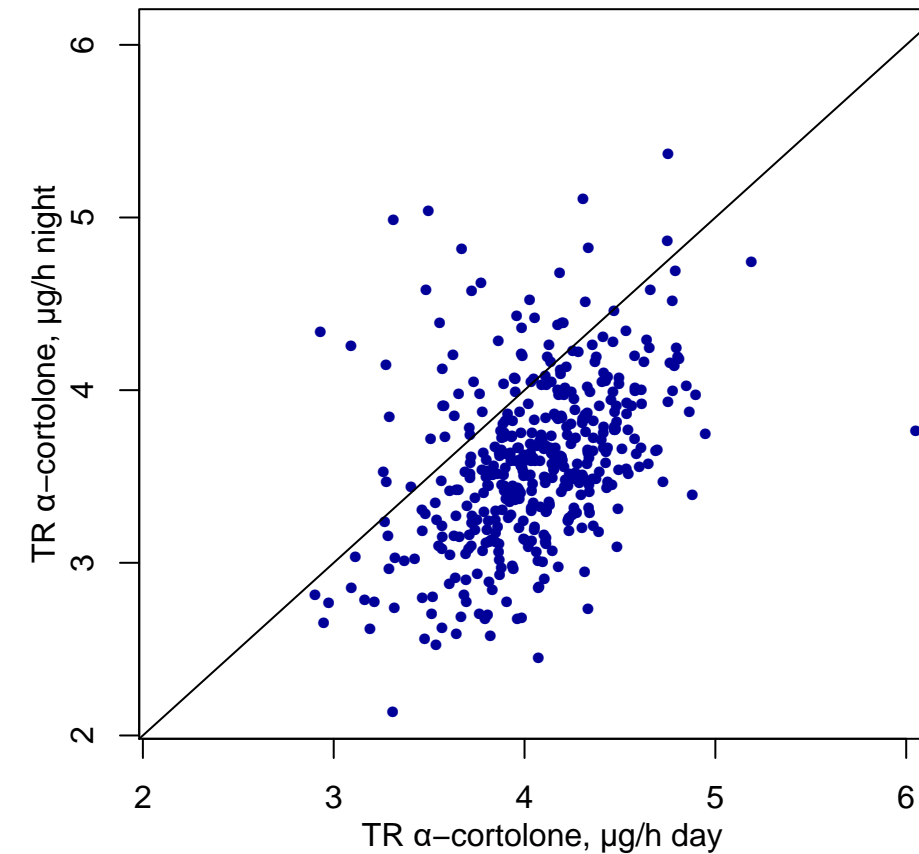

(h) W : rho= 0.577 n= 362

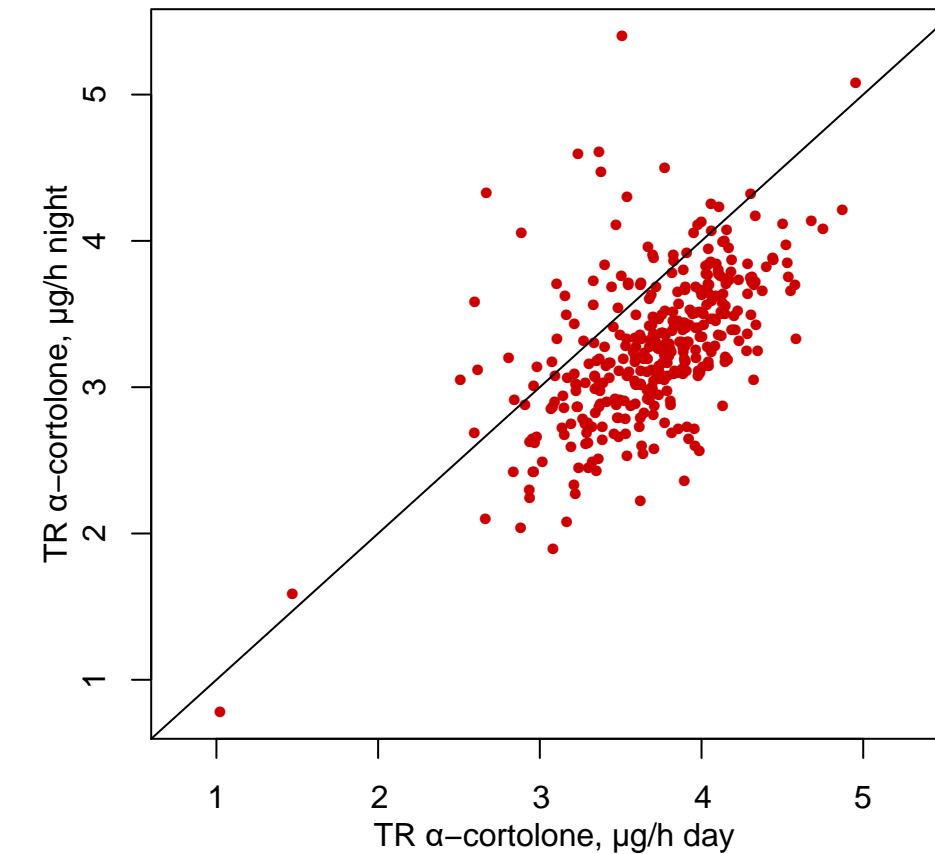

(a) M vs W:  $\delta = 1.43$   $p = 0$

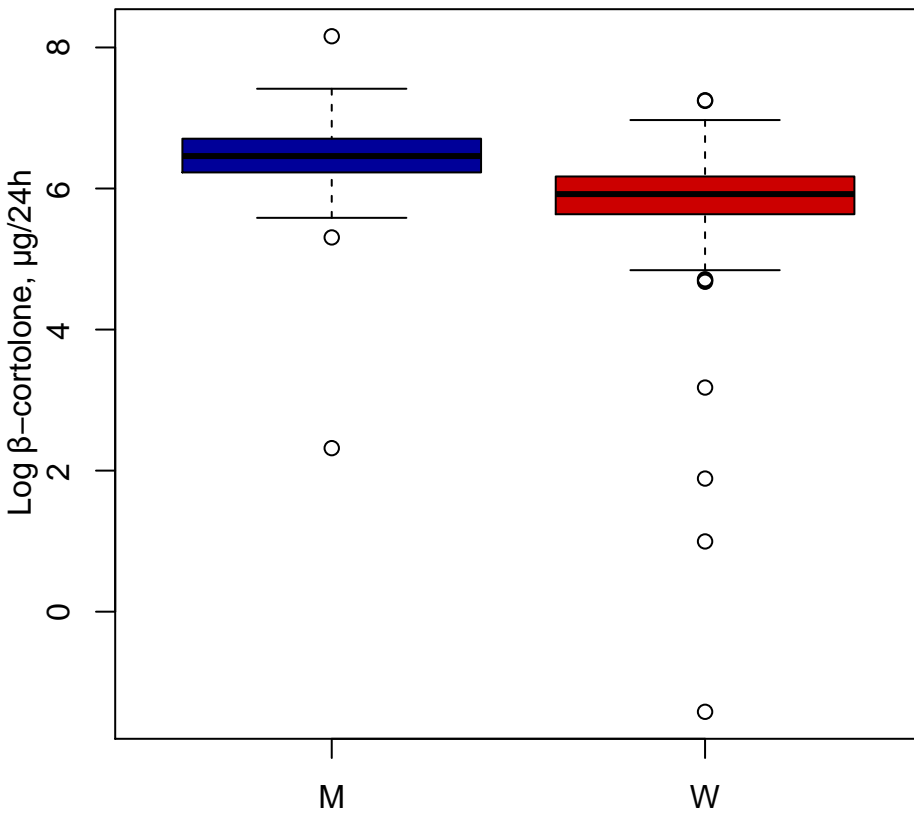

(b) M:  $p = 0$  W:  $p = 0.92$

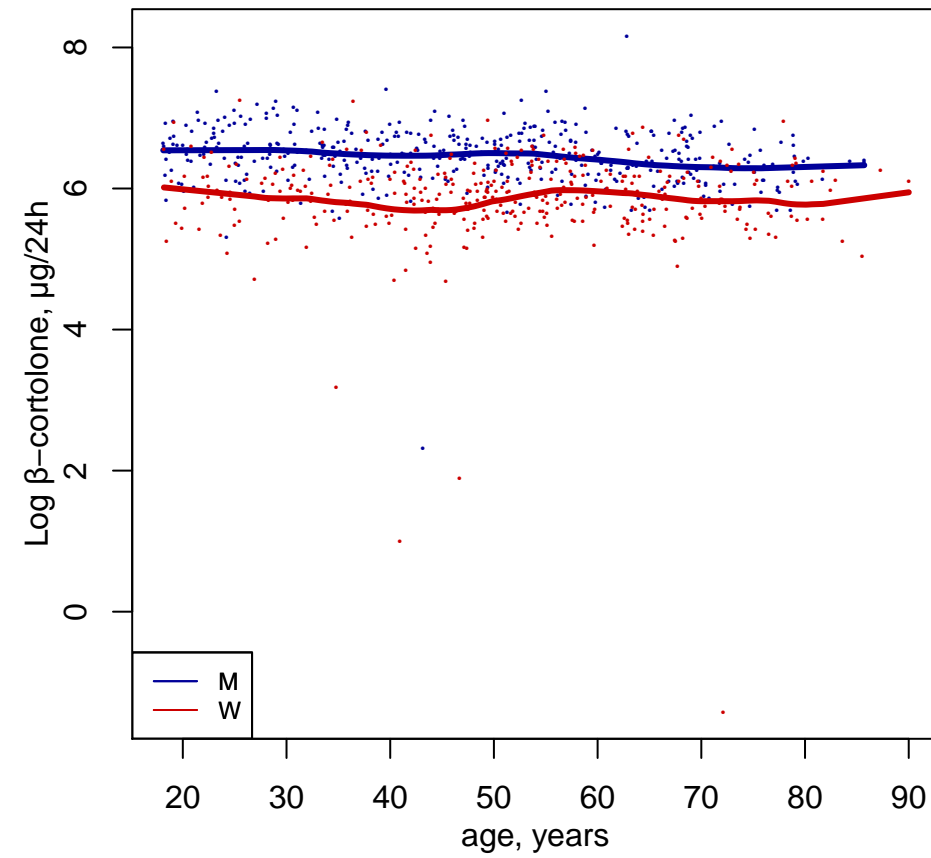

(c) TR= 0.1 nout= 2 sk= -0.02 ku= -0.21

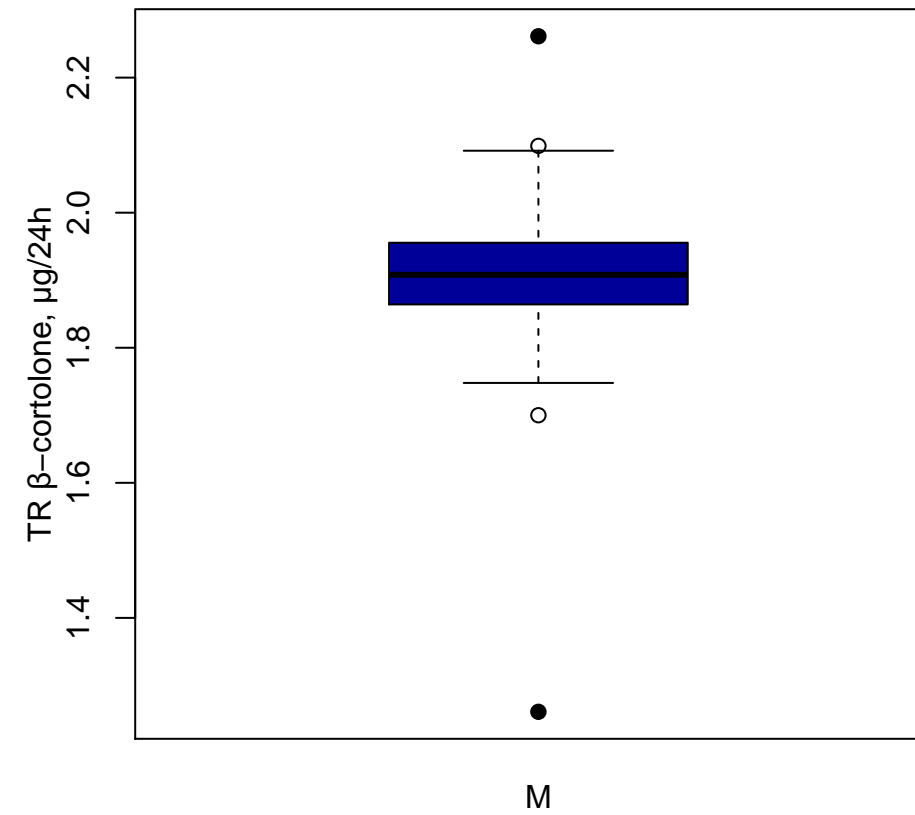

(d) TR= 0 nout= 4 sk= 0.04 ku= -0.21

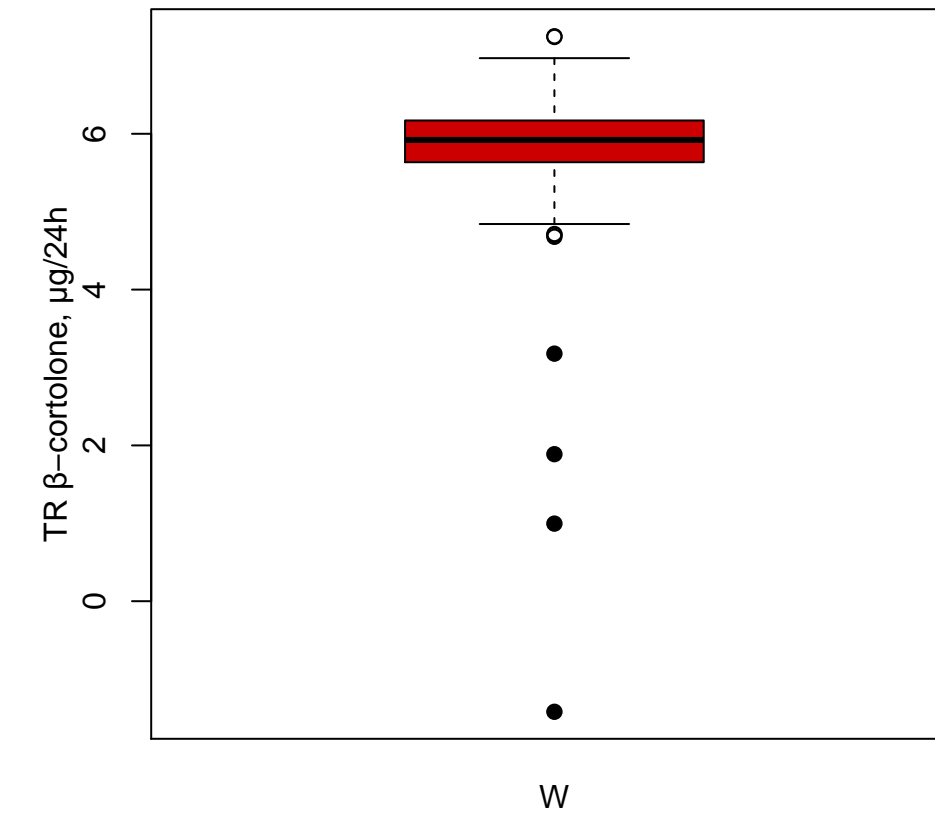

(e) D vs N:  $\delta = 0.76$   $p = 0$

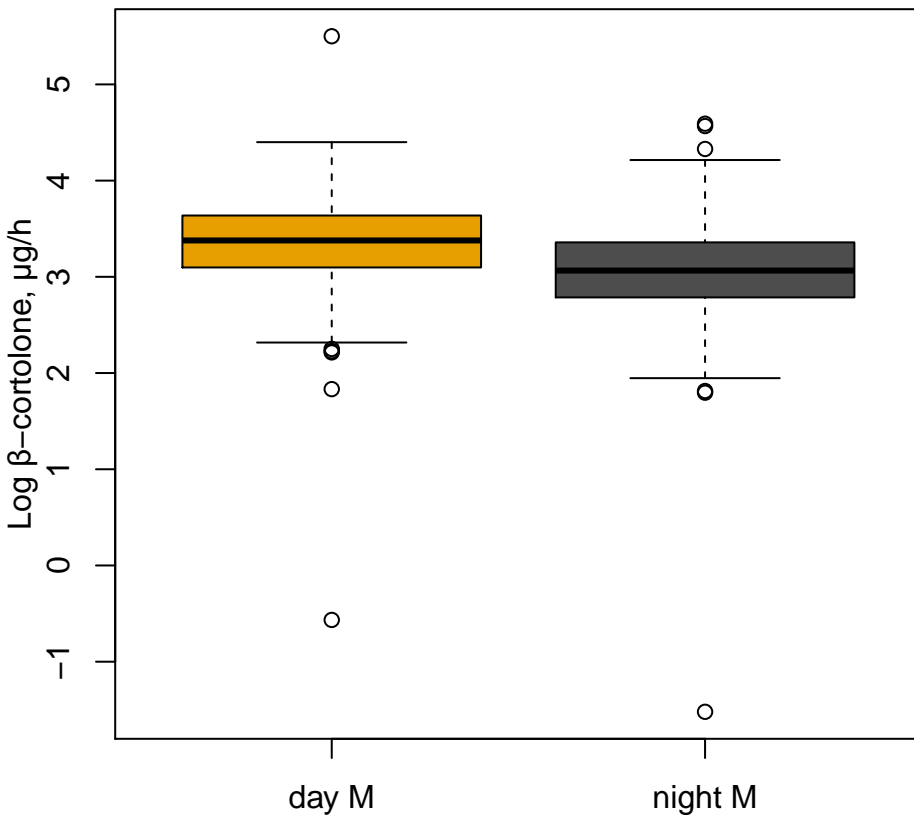

(f) D vs N:  $\delta = 0.68$   $p = 0$

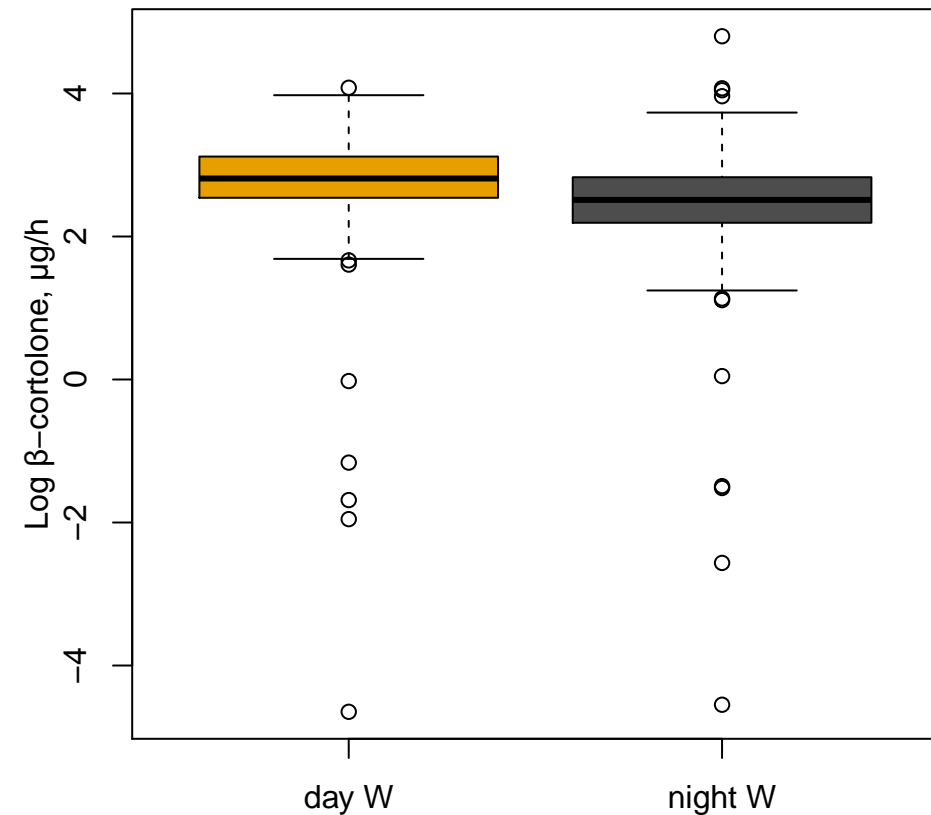

(g) M :  $\rho = 0.484$   $n = 425$

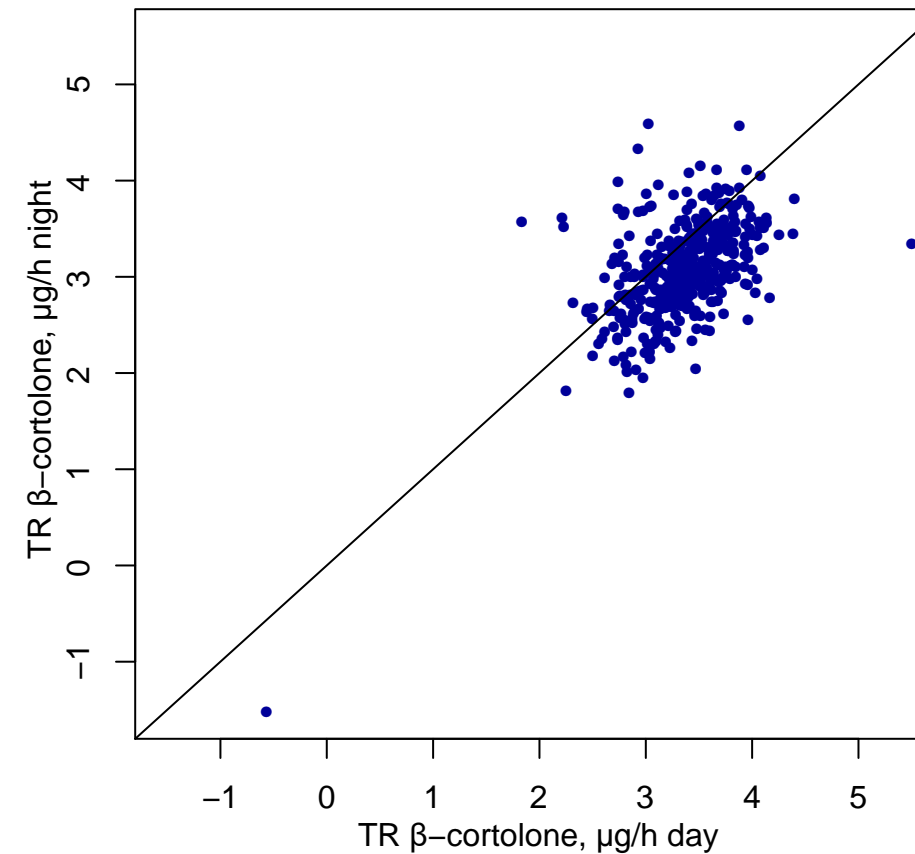

(h) W :  $\rho = 0.619$   $n = 369$

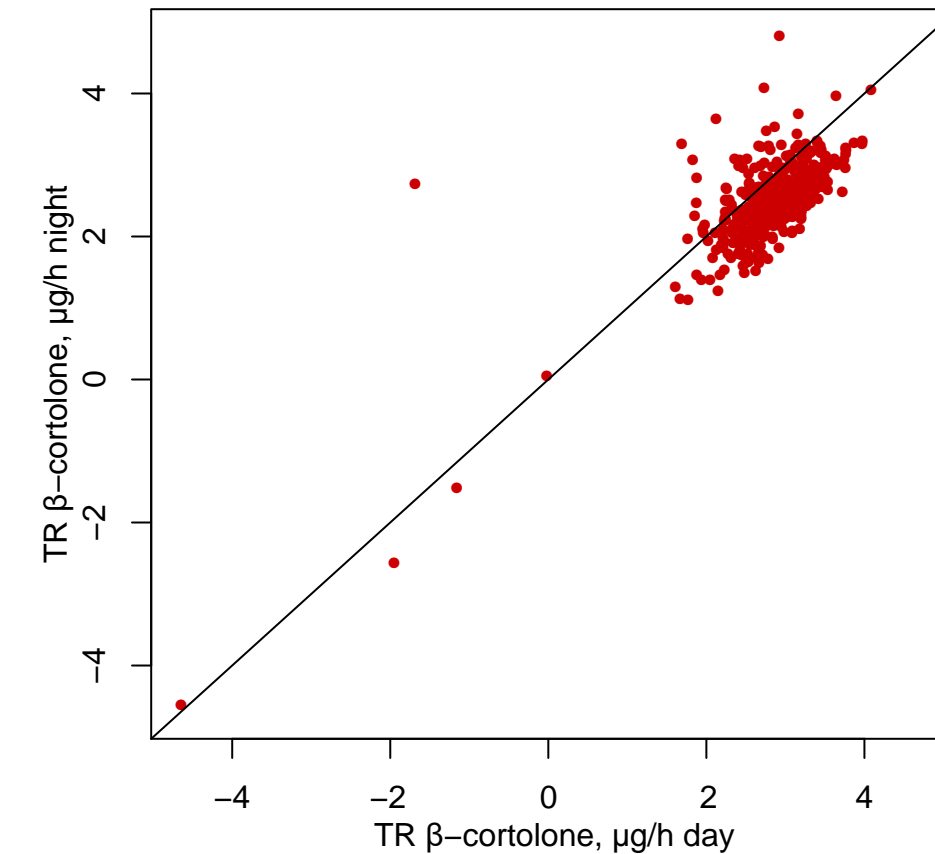



(a) M vs W: delta= 0.24 p = 0

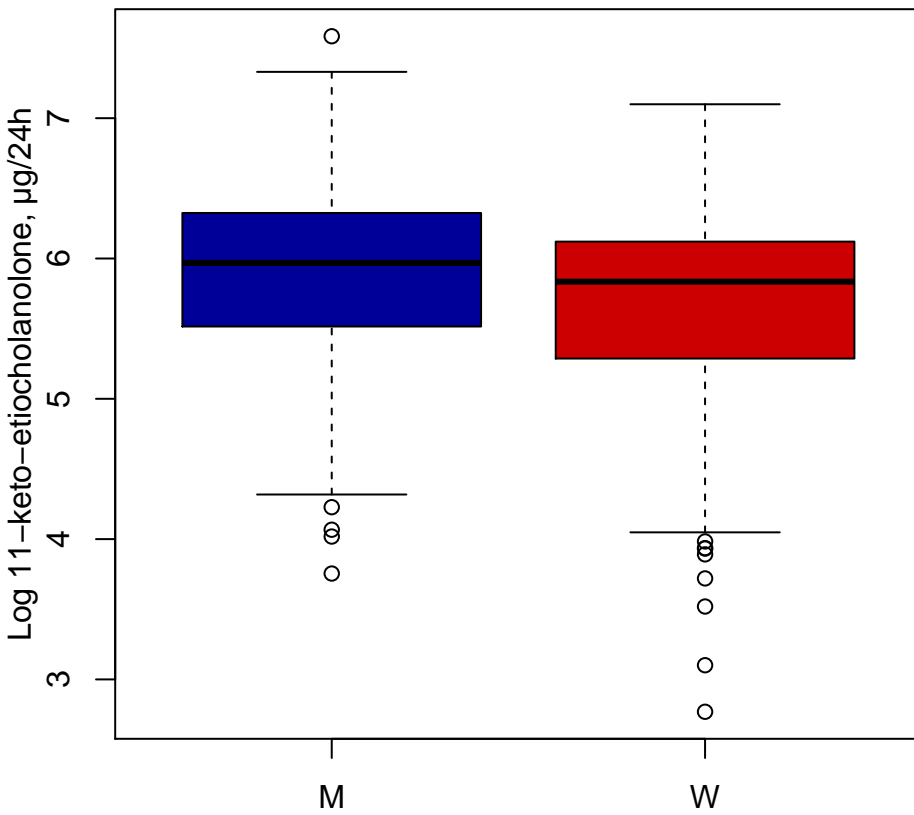

(b) M: p = 0.087 W: p = 0.066

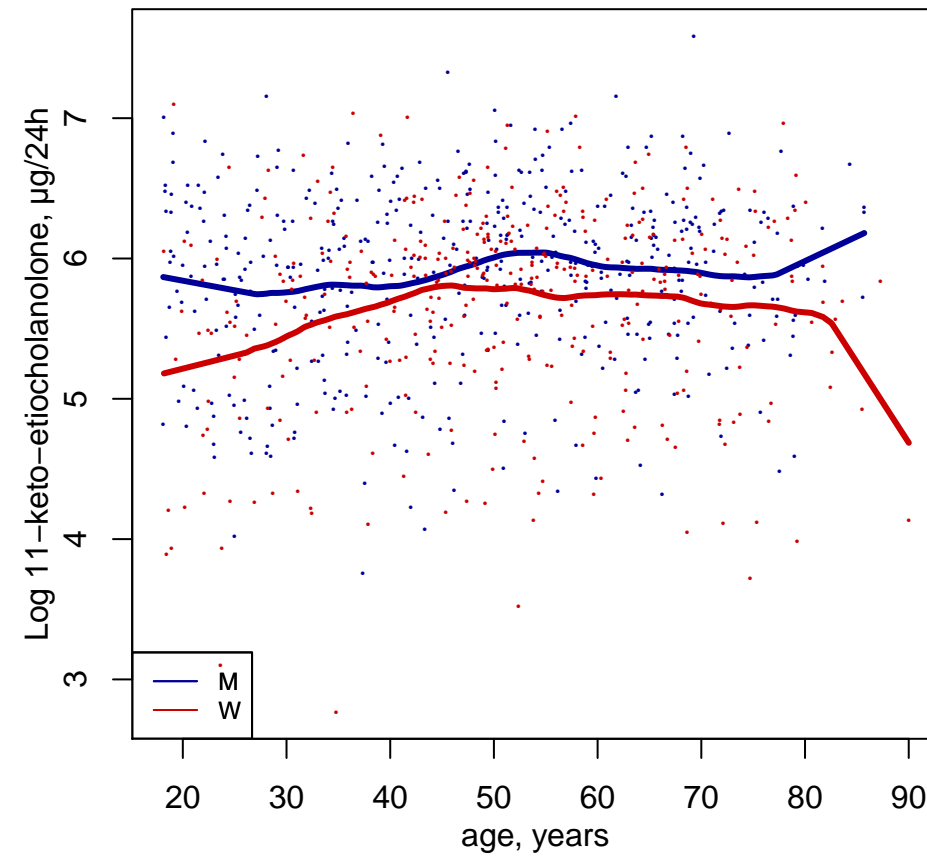

(c) TR= 0.3 nout= 0 sk= -0.05 ku= -0.1

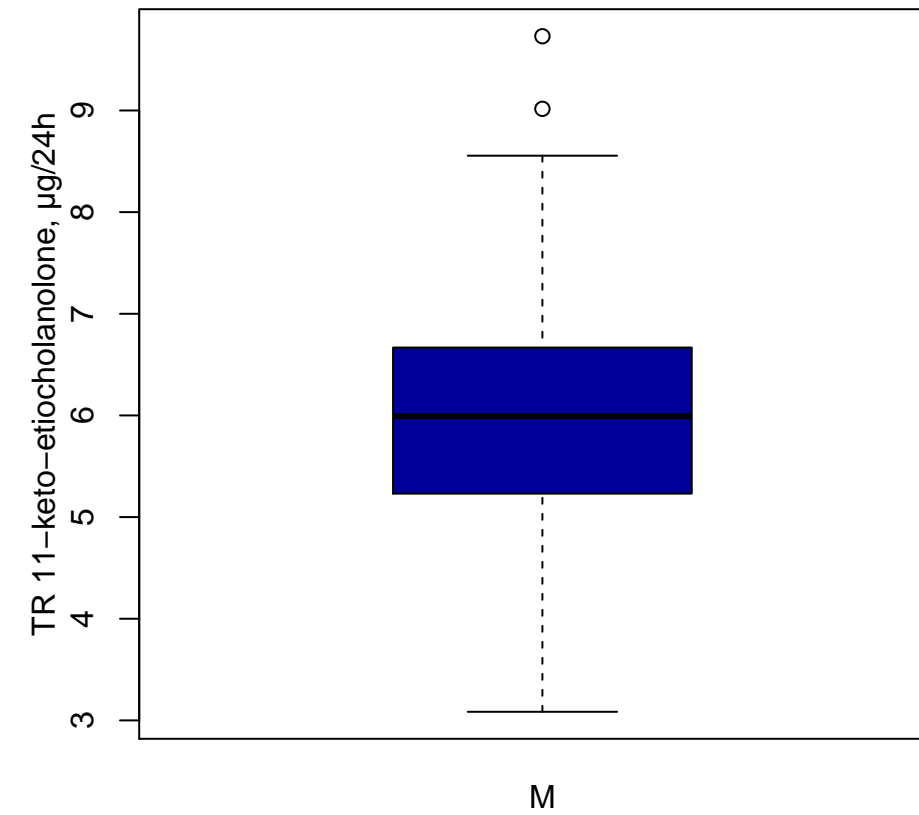

(d) TR= 0.4 nout= 0 sk= -0.06 ku= -0.1

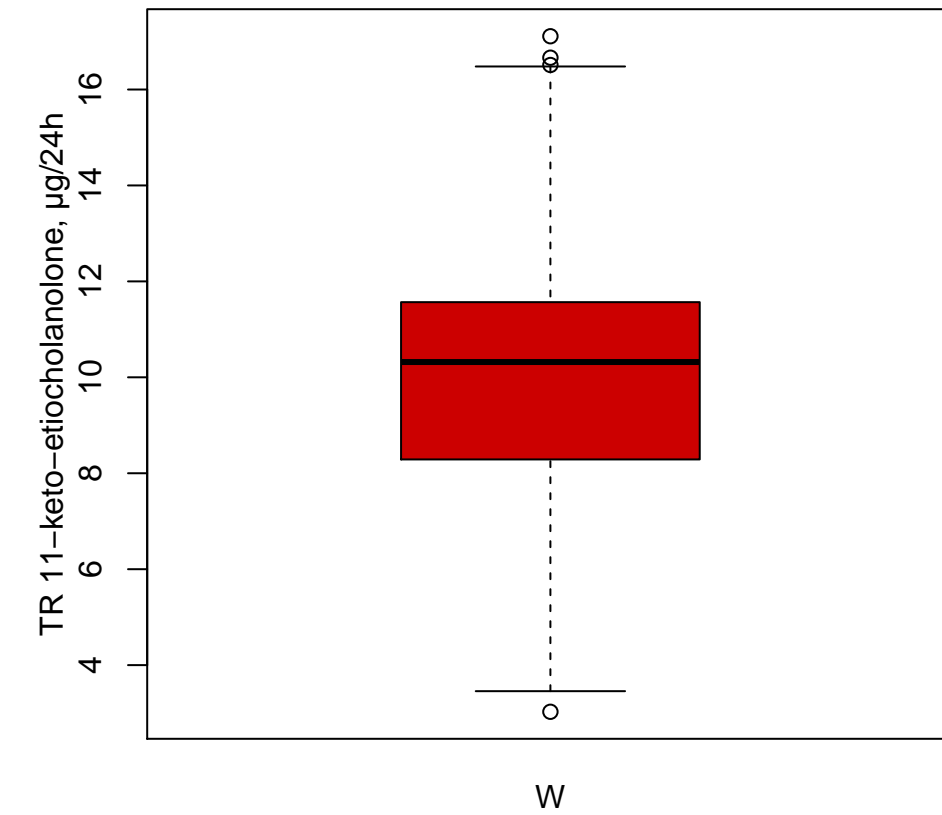

(e) D vs N: delta= 0.08 p = 0

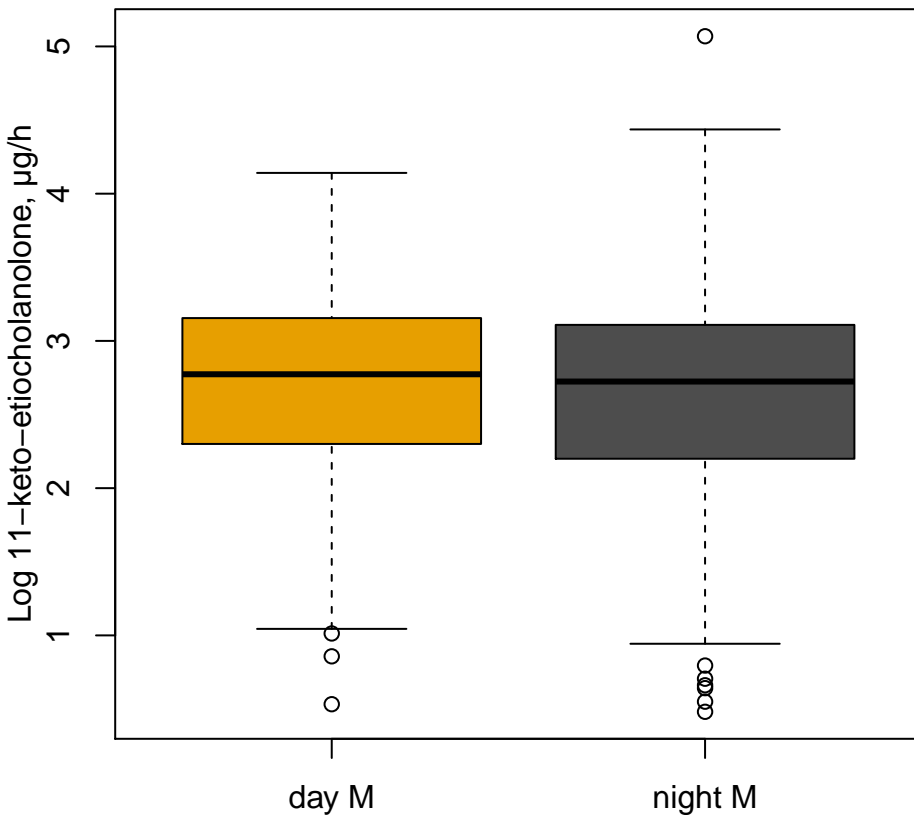

(f) D vs N: delta= 0.18 p = 0

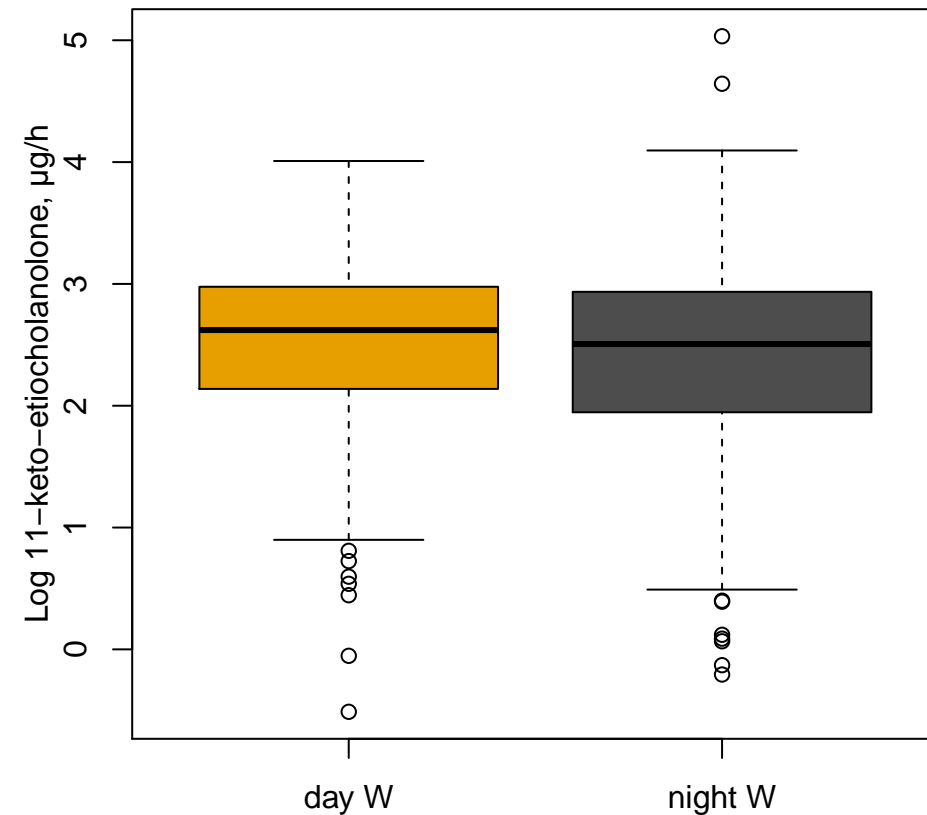

(g) M : rho= 0.721 n= 453

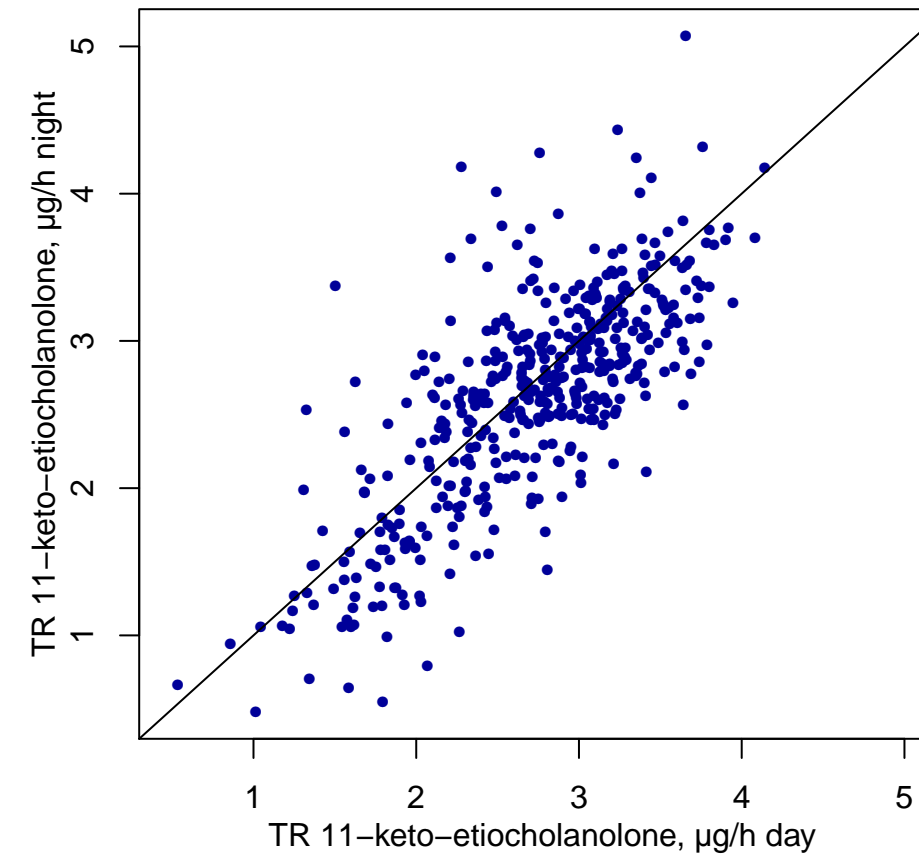

(h) W : rho= 0.756 n= 379

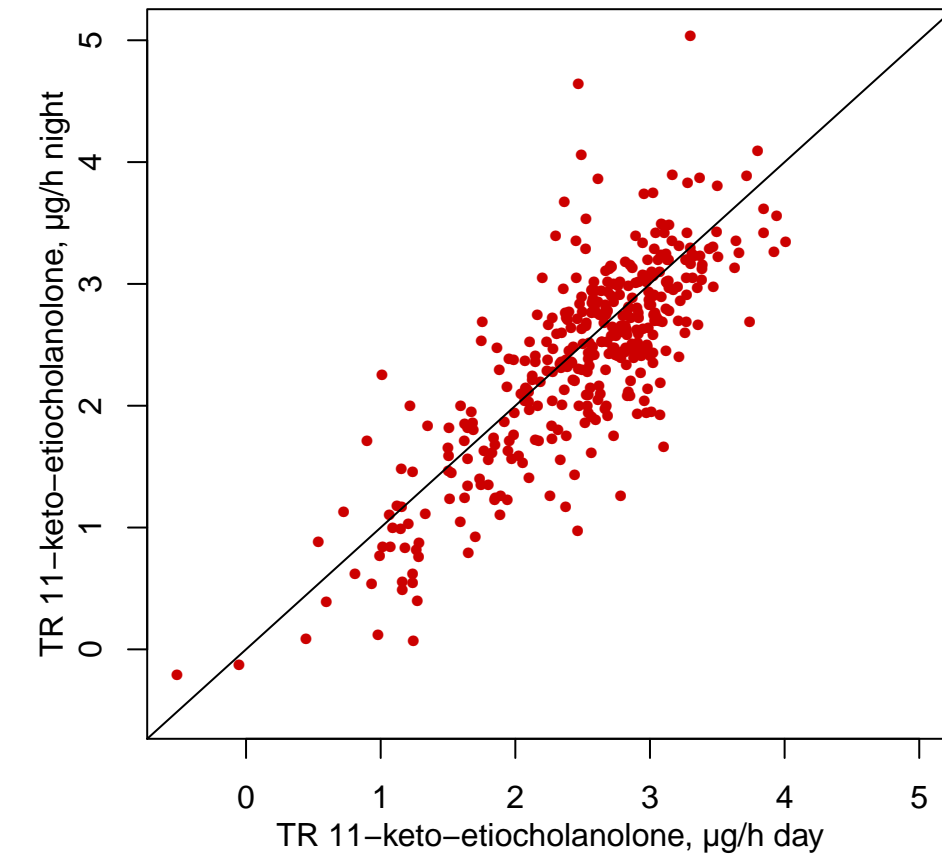

Supplement: pone.0214549.s003.pdf [file pone.0214549.s003.pdf]
