# Supplementary material for: Reference intervals for the urinary steroid metabolome: The impact of sex, age, day and night time on human adult steroidogenesis
Source: PubMed Central journal article supplement (PMC6440635; doi:10.1371/journal.pone.0214549), 2019-03-29
Supplement: pone.0214549.s002.pdf [file pone.0214549.s002.pdf]

**Supporting Figure 2. Example of a selected-ion monitoring chromatogram.** A plot of the sum of ion abundances for the selected compound-specific ions on the vertical axis versus the retention time of each characteristic ion on the horizontal axis simultaneously obtained by a GC-MS analysis of urinary steroid derivatives is shown. Multiple chromatographic peaks indicate the elution of numerous individual steroid compounds. By knowing the retention time for a given steroid indicated in the table, the members of the urinary steroid profile can be distinguished. Some steroid compounds are labeled. QIon: quantifier ion [m/z]. RT: retention time [min].

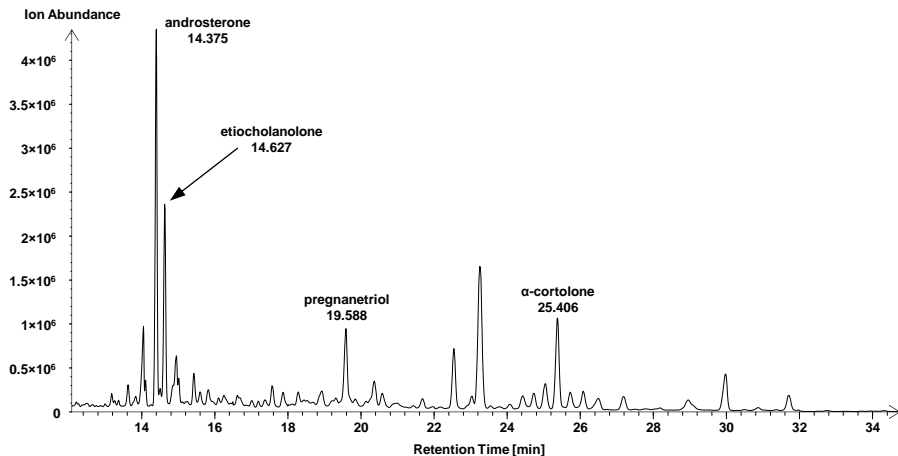

| Compound Name                 | QIon | RT     | Compound Name                     | QIon | RT     |
|-------------------------------|------|--------|-----------------------------------|------|--------|
| androsterone                  | 270  | 14.375 | pregnenetriol                     | 433  | 23.017 |
| androstenediol                | 331  | 14.645 | TH-cortisone                      | 578  | 23.315 |
| etiocholanolone               | 270  | 14.627 | TH-11-dehydrocorticosterone       | 490  | 23.586 |
| dehydroepiandrosterone        | 268  | 15.429 | TH-corticosterone                 | 564  | 24.139 |
| androstenediol                | 239  | 15.859 | 5α-TH-corticosterone              | 564  | 24.491 |
| 5α-DH-testosterone            | 391  | 16.013 | TH-cortisol                       | 652  | 24.766 |
| 11-keto-etiocholanolone       | 269  | 16.107 | 5α-TH-cortisol                    | 652  | 25.056 |
| 17β-estradiol                 | 416  | 16.521 | α-cortolone                       | 449  | 25.406 |
| testosterone                  | 389  | 16.719 | TH-aldosterone                    | 506  | 25.515 |
| 17α-OH-pregnanolone           | 476  | 17.580 | 18-OH-TH-11-dehydrocorticosterone | 457  | 26.036 |
| 11β-OH-androsterone           | 268  | 17.580 | β-cortol                          | 343  | 26.046 |
| 11β-OH-etiocholanolone        | 268  | 17.896 | β-cortolone                       | 449  | 26.056 |
| 16α-OH-dehydroepiandrosterone | 266  | 18.311 | α-cortol                          | 343  | 27.202 |
| pregnanediol                  | 269  | 18.972 | cortisone                         | 531  | 29.022 |
| pregnanetriol                 | 435  | 19.588 | cortisol                          | 605  | 30.763 |
| androstenediol                | 432  | 20.589 | 20β-DH-cortisone                  | 402  | 30.857 |
| TH-11-deoxycortisol           | 564  | 20.972 | 20α-DH-cortisone                  | 402  | 31.560 |
| TH-11-deoxycorticosterone     | 476  | 21.234 | 6β-OH-cortisol                    | 513  | 31.998 |
| estriol                       | 504  | 21.285 | 18-OH-cortisol                    | 344  | 31.975 |
| pregnanetriolone              | 449  | 21.971 | 20α-DH-cortisol                   | 296  | 32.770 |
