# Supplementary material for: Reference intervals for the urinary steroid metabolome: The impact of sex, age, day and night time on human adult steroidogenesis
Source: PubMed Central journal article supplement (PMC6440635; doi:10.1371/journal.pone.0214549), 2019-03-29
Supplement: pone.0214549.s005.pdf [file pone.0214549.s005.pdf]

**Supporting Table 1. Quantitative urinary steroid excretion values measured by GC-MS published since 1986 in adults.**

| Author, y, reference              | Shackleton, 1986, (1)                                       |        | Bevan et al., 1986, (2)                | Weykamp et al., 1989, (3)                                                                                                                                                                       |          |          |          |          |          |   |
|-----------------------------------|-------------------------------------------------------------|--------|----------------------------------------|-------------------------------------------------------------------------------------------------------------------------------------------------------------------------------------------------|----------|----------|----------|----------|----------|---|
|                                   | F                                                           | M      | F                                      | F                                                                                                                                                                                               |          |          | M        |          |          |   |
| Sex                               |                                                             |        |                                        |                                                                                                                                                                                                 |          |          |          |          |          |   |
| Age (y)                           | 22-50                                                       | 22-50  | reproductive age                       | 17-50                                                                                                                                                                                           | 51-70    | > 70     | 17-50    | 51-70    | > 70     |   |
| Number of subjects                | 13                                                          | 17     | NA                                     | 24                                                                                                                                                                                              | 24       | 24       | 24       | 24       | 24       |   |
| Type of data                      | NA                                                          |        | NA                                     | 2.5 <sup>th</sup> -97.5 <sup>th</sup> percentile                                                                                                                                                |          |          |          |          |          |   |
| Measuring unit                    | µg/24h                                                      | µg/24h | µmol/24h                               | µmol/24h                                                                                                                                                                                        |          |          |          |          |          |   |
| Analysis method                   | GC-MS                                                       |        | NA                                     | GC without MS                                                                                                                                                                                   |          |          |          |          |          |   |
| Population                        | random sample corrected for mean daily creatinine excretion |        | non-pregnant women of reproductive age | good health, no medication, female: neither pregnancy nor using oral contraceptives, at 24 institutions in The Netherland and Belgium (1 subject from each sex and age stratum per institution) |          |          |          |          |          |   |
| Subgroups                         | -                                                           | -      | -                                      | -                                                                                                                                                                                               | -        | -        | -        | -        | -        | - |
| <b>Progesterones</b>              |                                                             |        |                                        |                                                                                                                                                                                                 |          |          |          |          |          |   |
| 17α-OH-pregnanolone               |                                                             |        |                                        |                                                                                                                                                                                                 |          |          |          |          |          |   |
| pregnanetriol                     | 362                                                         | 555    | 1.0-4.2                                | 1.0-3.9                                                                                                                                                                                         | 0.6-2.5  | 0.3-1.3  | 1.4-6.2  | 1.3-4.7  | 0.8-3.1  |   |
| pregnenetriol                     | 421                                                         | 522    |                                        |                                                                                                                                                                                                 |          |          |          |          |          |   |
| pregnanetriolone                  |                                                             |        |                                        |                                                                                                                                                                                                 |          |          |          |          |          |   |
| pregnanediol                      |                                                             |        | 0.4-4.8                                | 0.7-7.1                                                                                                                                                                                         | 0.3-4.2  | 0.0-2.2  | 0.5-3.3  | 0.5-2.7  | 0.4-1.8  |   |
| <b>Androgens</b>                  |                                                             |        |                                        |                                                                                                                                                                                                 |          |          |          |          |          |   |
| dehydroepiandrosterone            | 512                                                         | 2243   | 0.2-1.0                                | 0.2-1.6                                                                                                                                                                                         | 0.2-0.9  | 0.1-0.5  | 0.0-2.8  | 0.0-3.0  | 0.0-1.8  |   |
| 16α-OH-dehydroepiandrosterone     |                                                             |        | 0.6-1.3                                |                                                                                                                                                                                                 |          |          |          |          |          |   |
| androstenediol                    |                                                             |        |                                        |                                                                                                                                                                                                 |          |          |          |          |          |   |
| androstenetriol                   |                                                             |        | 0.3-1.9                                |                                                                                                                                                                                                 |          |          |          |          |          |   |
| testosterone                      |                                                             |        |                                        |                                                                                                                                                                                                 |          |          |          |          |          |   |
| 5α-DH-testosterone                |                                                             |        |                                        |                                                                                                                                                                                                 |          |          |          |          |          |   |
| androstanediol                    |                                                             |        |                                        |                                                                                                                                                                                                 |          |          |          |          |          |   |
| androsterone                      | 1847                                                        | 2430   | 2.1-6.5                                | 2.3-9.7                                                                                                                                                                                         | 0.6-5.5  | 0.2-3.1  | 3.8-14.1 | 2.3-11.6 | 0.5-6.8  |   |
| 11β-OH-androsterone               | 675                                                         | 1031   | 1.2-3.8                                | 1.3-4.8                                                                                                                                                                                         | 1.3-4.1  | 1.0-3.1  | 2.0-7.5  | 2.0-7.5  | 1.5-5.6  |   |
| etiocholanolone                   | 2471                                                        | 3018   | 2.7-6.9                                | 2.4-9.4                                                                                                                                                                                         | 1.2-6.1  | 0.3-3.3  | 3.0-15.8 | 2.5-12.7 | 0.8-7.3  |   |
| <b>Estrogens</b>                  |                                                             |        |                                        |                                                                                                                                                                                                 |          |          |          |          |          |   |
| 17β-estradiol                     |                                                             |        |                                        |                                                                                                                                                                                                 |          |          |          |          |          |   |
| estriol                           |                                                             |        |                                        |                                                                                                                                                                                                 |          |          |          |          |          |   |
| <b>Corticosterones</b>            |                                                             |        |                                        |                                                                                                                                                                                                 |          |          |          |          |          |   |
| TH-11-deoxycorticosterone         |                                                             |        |                                        |                                                                                                                                                                                                 |          |          |          |          |          |   |
| TH-11-dehydrocorticosterone       | 526                                                         | 553    | 0.1-0.4                                |                                                                                                                                                                                                 |          |          |          |          |          |   |
| 18-OH-TH-11-dehydrocorticosterone |                                                             |        |                                        |                                                                                                                                                                                                 |          |          |          |          |          |   |
| TH-corticosterone                 | 245                                                         | 253    | 0.2-0.7                                |                                                                                                                                                                                                 |          |          |          |          |          |   |
| 5α-TH-corticosterone              | 504                                                         | 440    | 0.4-0.8                                |                                                                                                                                                                                                 |          |          |          |          |          |   |
| <b>Mineralocorticoids</b>         |                                                             |        |                                        |                                                                                                                                                                                                 |          |          |          |          |          |   |
| TH-aldosterone                    |                                                             |        |                                        |                                                                                                                                                                                                 |          |          |          |          |          |   |
| TH-11-deoxycortisol               |                                                             |        |                                        | 0.2-1.2                                                                                                                                                                                         | 0.2-1.0  | 0.1-0.5  | 0.1-1.2  | 0.0-1.2  | 0.0-0.8  |   |
| <b>Glucocorticoids</b>            |                                                             |        |                                        |                                                                                                                                                                                                 |          |          |          |          |          |   |
| cortisol                          |                                                             |        |                                        |                                                                                                                                                                                                 |          |          |          |          |          |   |
| 6β-OH-cortisol                    |                                                             |        |                                        |                                                                                                                                                                                                 |          |          |          |          |          |   |
| 18-OH-cortisol                    |                                                             |        |                                        |                                                                                                                                                                                                 |          |          |          |          |          |   |
| 20α-DH-cortisol                   |                                                             |        |                                        |                                                                                                                                                                                                 |          |          |          |          |          |   |
| TH-cortisol                       | 1552                                                        | 1956   | 1.3-2.7                                | 2.4-7.0                                                                                                                                                                                         | 2.4-7.1  | 2.2-6.7  | 3.4-12.4 | 3.9-13.1 | 3.6-11.7 |   |
| α-cortol                          | 235                                                         | 194    | 0.4-0.7                                |                                                                                                                                                                                                 |          |          |          |          |          |   |
| α-cortolone                       | 524                                                         | 479    | 0.7-1.9                                |                                                                                                                                                                                                 |          |          |          |          |          |   |
| β-cortol                          |                                                             |        |                                        |                                                                                                                                                                                                 |          |          |          |          |          |   |
| β-cortolone                       | 506#                                                        | 600#   | 0.9-3.7#                               |                                                                                                                                                                                                 |          |          |          |          |          |   |
| 11β-OH-etiocholanolone            | 283                                                         | 300    | 0.3-0.9                                | 0.5-2.7                                                                                                                                                                                         | 0.5-2.6  | 0.4-2.4  | 0.5-3.1  | 0.5-2.4  | 0.2-1.8  |   |
| allo-TH-cortisol                  | 625                                                         | 1254   | 0.9-2.3                                | 1.1-5.6                                                                                                                                                                                         | 0.7-4.9  | 0.5-3.3  | 1.8-10.4 | 1.5-10.3 | 0.8-8.6  |   |
| cortisone                         |                                                             |        |                                        |                                                                                                                                                                                                 |          |          |          |          |          |   |
| 20α-DH-cortisone                  |                                                             |        |                                        |                                                                                                                                                                                                 |          |          |          |          |          |   |
| 20β-DH-cortisone                  |                                                             |        |                                        |                                                                                                                                                                                                 |          |          |          |          |          |   |
| TH-cortisone                      | 3113                                                        | 3107   | 3.9-7.7                                | 4.6-11.6                                                                                                                                                                                        | 3.8-11.2 | 3.4-10.8 | 6.7-20.2 | 6.1-17.0 | 4.3-13.8 |   |
| 11-keto-androsterone              |                                                             |        |                                        | 0.3-1.9                                                                                                                                                                                         | 0.3-1.9  | 0.3-1.4  | 0.3-2.7  | 0.1-2.4  | 0.0-1.9  |   |
| 11-keto-etiocholanolone           | 343*                                                        | 515*   | 0.1-0.8                                | 0.3-1.8                                                                                                                                                                                         | 0.3-1.6  | 0.2-1.1  | 0.4-2.5  | 0.4-2.1  | 0.2-1.6  |   |
| Creatinine, mmol/24h              |                                                             |        |                                        | 7.1-12.4                                                                                                                                                                                        | 4.7-11.6 | 4.1-10.3 | 9.2-19.4 | 7.2-18.5 | 5.3-15.8 |   |

Abbreviations: GC, gas chromatography; MS, mass spectrometry; F, female; M: male; d, days; y, years. #the value represents the sum of the two compounds β-cortol and β-cortolone. \*the value represents the sum of the two compounds 11-keto-androsterone and 11-keto-androsterone

Supporting Table 1. (continued)

| Author, year, reference           | Shackleton,<br>1993, (4) |                 | Finken et al.,<br>1999, (5)                                                                                                                                              |                                                                           |                                                     |                  |
|-----------------------------------|--------------------------|-----------------|--------------------------------------------------------------------------------------------------------------------------------------------------------------------------|---------------------------------------------------------------------------|-----------------------------------------------------|------------------|
|                                   | F                        | M               | F                                                                                                                                                                        |                                                                           | M                                                   |                  |
| Sex                               | 18-50                    | 18-50           | 20-40                                                                                                                                                                    |                                                                           | 22-35                                               |                  |
| Age (y)                           | 17                       | 17              | 10                                                                                                                                                                       | 10                                                                        | 10                                                  | 10               |
| Number of subjects                | Mean, Range              |                 | Median [25 <sup>th</sup> -75 <sup>th</sup> percentile]                                                                                                                   |                                                                           |                                                     |                  |
| Type of data                      | µg/24h                   | µg/24h          | µg/24h                                                                                                                                                                   |                                                                           |                                                     |                  |
| Measuring unit                    | GC-MS                    |                 | GC-MS                                                                                                                                                                    |                                                                           |                                                     |                  |
| Analysis method                   | NA                       |                 | white, 10 healthy men and 10 healthy women with regular endogenous menstrual cycles (between 24-34 days), all studies were completed during the months December to March |                                                                           |                                                     |                  |
| Population                        | -                        | -               | Menstrual phase<br>(2-5 d after<br>starting<br>menstruation)                                                                                                             | Follicular phase<br>(19-16 d before the<br>next expected<br>menstruation) | Luteal phase (9-5<br>d before next<br>menstruation) | -                |
| Subgroups                         | -                        | -               | -                                                                                                                                                                        | -                                                                         | -                                                   | -                |
| <b>Progesterones</b>              |                          |                 |                                                                                                                                                                          |                                                                           |                                                     |                  |
| 17α-OH-pregnanolone               | 128, 22-570              | 243, 72-452     |                                                                                                                                                                          |                                                                           |                                                     |                  |
| pregnanetriol                     | 559, 117-1742            | 618, 189-1737   |                                                                                                                                                                          |                                                                           |                                                     |                  |
| pregnenetriol                     | 161, 80-352              | 307, 71-363     |                                                                                                                                                                          |                                                                           |                                                     |                  |
| pregnanetriolone                  | 14, 3-46                 | 16, 6-66        |                                                                                                                                                                          |                                                                           |                                                     |                  |
| pregnanediol                      | 351, 66-2654             | 173, 110-446    |                                                                                                                                                                          |                                                                           |                                                     |                  |
| <b>Androgens</b>                  |                          |                 |                                                                                                                                                                          |                                                                           |                                                     |                  |
| dehydroepiandrosterone            | 188, 34-1497             | 490, 71-2455    |                                                                                                                                                                          |                                                                           |                                                     |                  |
| 16α-OH-dehydroepiandrosterone     | 310, 63-1377             | 520-110-1480    |                                                                                                                                                                          |                                                                           |                                                     |                  |
| androstenediol                    | 97, 29-203               | 323, 38-390     |                                                                                                                                                                          |                                                                           |                                                     |                  |
| androstenediol                    | 321, 90-695              | 524, 87-1433    |                                                                                                                                                                          |                                                                           |                                                     |                  |
| testosterone                      |                          |                 |                                                                                                                                                                          |                                                                           |                                                     |                  |
| 5α-DH-testosterone                |                          |                 |                                                                                                                                                                          |                                                                           |                                                     |                  |
| androstenediol                    | 95, 16-231               | 186, 67-649     |                                                                                                                                                                          |                                                                           |                                                     |                  |
| androsterone                      | 1289, 457-3656           | 2109, 738-5204  |                                                                                                                                                                          |                                                                           |                                                     |                  |
| 11β-OH-androsterone               | 463, 202-1189            | 992, 280-2821   |                                                                                                                                                                          |                                                                           |                                                     |                  |
| etiocolanolone                    | 1504, 488-3684           | 1865, 652-3387  | 1881 [1384-2492]                                                                                                                                                         | 1628 [1234-2571]                                                          | 2122 [1209-2651]                                    | 2191 [1076-2566] |
| <b>Estrogens</b>                  |                          |                 |                                                                                                                                                                          |                                                                           |                                                     |                  |
| 17β-estradiol                     | 9, 0.1-15                | 3, 0.1-6        |                                                                                                                                                                          |                                                                           |                                                     |                  |
| estriol                           | 12, 1-30                 | 5, 1-10         |                                                                                                                                                                          |                                                                           |                                                     |                  |
| <b>Corticosterones</b>            |                          |                 |                                                                                                                                                                          |                                                                           |                                                     |                  |
| TH-11-deoxycorticosterone         | 104, 50-253              | 150, 44-328     |                                                                                                                                                                          |                                                                           |                                                     |                  |
| TH-11-dehydrocorticosterone       | 19, 1-108                | 14, 2-38        |                                                                                                                                                                          |                                                                           |                                                     |                  |
| 18-OH-TH-11-dehydrocorticosterone | 75, 20-150               | 139, 32-431     |                                                                                                                                                                          |                                                                           |                                                     |                  |
| TH-corticosterone                 | 95, 36-276               | 127, 14-393     |                                                                                                                                                                          |                                                                           |                                                     |                  |
| 5α-TH-corticosterone              | 238, 79-525              | 323, 117-1275   |                                                                                                                                                                          |                                                                           |                                                     |                  |
| <b>Mineralocorticoids</b>         |                          |                 |                                                                                                                                                                          |                                                                           |                                                     |                  |
| TH-aldosterone                    | 29, 7-51                 | 31, 8-60        |                                                                                                                                                                          |                                                                           |                                                     |                  |
| TH-11-deoxycortisol               | 33, 18-72                | 53, 16-111      |                                                                                                                                                                          |                                                                           |                                                     |                  |
| <b>Glucocorticoids</b>            |                          |                 |                                                                                                                                                                          |                                                                           |                                                     |                  |
| cortisol                          | 81, 19-212               | 130, 13-243     | 150 [84-204]                                                                                                                                                             | 163 [115-178]                                                             | 117 [71-256]                                        | 119 [85-139]     |
| 6β-OH-cortisol                    | 171, 101-532             | 254, 48-666     |                                                                                                                                                                          |                                                                           |                                                     |                  |
| 18-OH-cortisol                    | 79, 6-153                | 134, 6-410      |                                                                                                                                                                          |                                                                           |                                                     |                  |
| 20α-DH-cortisol                   | 53, 22-92                | 62, 21-111      |                                                                                                                                                                          |                                                                           |                                                     |                  |
| TH-cortisol                       | 1045, 321-1908           | 1722, 615-2997  | 1600 [1419-1968]                                                                                                                                                         | 1770 [1412-1965]                                                          | 2007 [1434-2259]                                    | 2197 [1748-2995] |
| α-cortol                          | 166, 67-289              | 214, 110-704    |                                                                                                                                                                          |                                                                           |                                                     |                  |
| α-cortolone                       | 888, 379-1316            | 1062, 376-2438  |                                                                                                                                                                          |                                                                           |                                                     |                  |
| β-cortol                          | 285, 35-759              | 431, 138-793    |                                                                                                                                                                          |                                                                           |                                                     |                  |
| β-cortolone                       | 367, 84-802              | 657, 242-1180   |                                                                                                                                                                          |                                                                           |                                                     |                  |
| 11β-OH-etiocholanolone            | 212, 24-844              | 345, 74-635     |                                                                                                                                                                          |                                                                           |                                                     |                  |
| allo-TH-cortisol                  | 696, 164-1252            | 1459, 414-2599  | 1811 [1391-2300]                                                                                                                                                         | 1950 [1698-2324]                                                          | 1943 [1765-2245]                                    | 2723 [2454-3154] |
| cortisone                         |                          |                 | 123 [85-145]                                                                                                                                                             | 116 [111-146]                                                             | 133 [122-195]                                       | 135 [115-150]    |
| 20α-DH-cortisone                  |                          |                 |                                                                                                                                                                          |                                                                           |                                                     |                  |
| 20β-DH-cortisone                  |                          |                 |                                                                                                                                                                          |                                                                           |                                                     |                  |
| TH-cortisone                      | 2066, 639-3528           | 3046, 1193-6760 | 1927 [1678-2860]                                                                                                                                                         | 2238 [1789-2735]                                                          | 1999 [1525-2515]                                    | 2393 [2082-2895] |
| 11-keto-androsterone              |                          |                 |                                                                                                                                                                          |                                                                           |                                                     |                  |
| 11-keto-etiocholanolone           | 278, 123-991*            | 497, 148-1104*  |                                                                                                                                                                          |                                                                           |                                                     |                  |
| Creatinine, mmol/24h              |                          |                 |                                                                                                                                                                          |                                                                           |                                                     |                  |

Abbreviations: GC, gas chromatography; MS, mass spectrometry; F, female; M: male; d, days; y, years. \*the value represents the sum of the two compounds 11-keto-androsterone and 11-keto-androsterone

Supporting Table 1. (continued)

| Author, y, reference              | Shamim et al.,<br>2000, (6)                                                                                                                                                                                                                 |                  |                     | Shackleton et al.,<br>2006, (7) and 2008, (8) |           | Taylor,<br>2006, (9) and 2013, (10) |          |
|-----------------------------------|---------------------------------------------------------------------------------------------------------------------------------------------------------------------------------------------------------------------------------------------|------------------|---------------------|-----------------------------------------------|-----------|-------------------------------------|----------|
|                                   | F                                                                                                                                                                                                                                           | M                | Sex<br>difference   | F                                             | M         | F                                   | M        |
| <b>Sex</b>                        |                                                                                                                                                                                                                                             |                  |                     |                                               |           |                                     |          |
| <b>Age (y)</b>                    | 31.1±4                                                                                                                                                                                                                                      | 30.5±3.9         |                     | NA                                            |           | NA                                  |          |
| <b>Number of subjects</b>         | 14                                                                                                                                                                                                                                          | 16               |                     | 17                                            | 17        | NA                                  |          |
| <b>Type of data</b>               | Median [25 <sup>th</sup> -75 <sup>th</sup> percentile]                                                                                                                                                                                      |                  | Mann-Whitney U-test | Range                                         |           | Range                               |          |
| <b>Measuring unit</b>             | µg/24h                                                                                                                                                                                                                                      |                  |                     | µg/24h                                        | µg/24h    | µg/24h                              | µg/24h   |
| <b>Analysis method</b>            | GC-MS                                                                                                                                                                                                                                       |                  |                     | GC-MS                                         |           | GC-MS                               |          |
| <b>Population</b>                 | normal haemoglobin, serum sodium, potassium and creatinine, biochemistry blood tests, chest X-ray, electrocardiogram and 24h ambulatory blood pressure monitoring to exclude borderline hypertension, no medication, no endocrine disorders |                  | p-value             | NA                                            |           | NA                                  |          |
| <b>Subgroups</b>                  | -                                                                                                                                                                                                                                           | -                | -                   | -                                             | -         | -                                   | -        |
| <b>Progesterones</b>              |                                                                                                                                                                                                                                             |                  |                     |                                               |           |                                     |          |
| 17α-OH-pregnanolone               |                                                                                                                                                                                                                                             |                  |                     | 32-657                                        | 41-728    |                                     |          |
| pregnanetriol                     |                                                                                                                                                                                                                                             |                  |                     | 87-1311                                       | 186-1505  | <890                                | <1563    |
| pregnenetriol                     |                                                                                                                                                                                                                                             |                  |                     | 44-342                                        | 28-1062   |                                     |          |
| pregnanetriolone                  |                                                                                                                                                                                                                                             |                  |                     | 1-77                                          | 4-37      |                                     |          |
| pregnanediol                      |                                                                                                                                                                                                                                             |                  |                     |                                               |           | <2430                               | <1450    |
| <b>Androgens</b>                  |                                                                                                                                                                                                                                             |                  |                     |                                               |           |                                     |          |
| dehydroepiandrosterone            | 100 [75-180]                                                                                                                                                                                                                                | 460 [290-750]    | 0.01                | 20-1138                                       | 5-1476    | <800                                | <1750    |
| 16α-OH-dehydroepiandrosterone     | 200 [150-377]                                                                                                                                                                                                                               | ? [220-380]      | 0.2                 | 35-655                                        | 40-796    | <515                                | <1480    |
| androstenediol                    |                                                                                                                                                                                                                                             |                  |                     | 28-201                                        | 45-954    |                                     |          |
| androstetriol                     | 320 [195-877]                                                                                                                                                                                                                               | 460 [430-560]    | 0.4                 | 40-540                                        | 42-710    | <760                                | <1630    |
| testosterone                      |                                                                                                                                                                                                                                             |                  |                     |                                               |           |                                     |          |
| 5α-DH-testosterone                |                                                                                                                                                                                                                                             |                  |                     |                                               |           |                                     |          |
| androstenediol                    |                                                                                                                                                                                                                                             |                  |                     | 15-147                                        | 48-578    |                                     |          |
| androsterone                      | 720 [522-820]                                                                                                                                                                                                                               | 1200 [1020-1482] | 0.0001              | 373-3414                                      | 798-4705  | <1610                               | 490-2570 |
| 11β-OH-androsterone               | 325 [220-410]                                                                                                                                                                                                                               | 730 [520-740]    | 0.003               | 191-854                                       | 500-1733  | 80-980                              | 370-1340 |
| etiocholanolone                   | 955 [600-1260]                                                                                                                                                                                                                              | 1220 [825-1502]  | 0.01                | 450-2900                                      | 689-3252  | <2180                               | 180-2424 |
| <b>Estrogens</b>                  |                                                                                                                                                                                                                                             |                  |                     |                                               |           |                                     |          |
| 17β-estradiol                     |                                                                                                                                                                                                                                             |                  |                     |                                               |           |                                     |          |
| estriol                           |                                                                                                                                                                                                                                             |                  |                     | 2-32                                          | 1-16      |                                     |          |
| <b>Corticosterones</b>            |                                                                                                                                                                                                                                             |                  |                     |                                               |           |                                     |          |
| TH-11-deoxycorticosterone         |                                                                                                                                                                                                                                             |                  |                     | 1-157                                         | 2-38      |                                     |          |
| TH-11-dehydrocorticosterone       |                                                                                                                                                                                                                                             |                  |                     | 76-596                                        | 104-554   | 40-410                              | <660     |
| 18-OH-TH-11-dehydrocorticosterone |                                                                                                                                                                                                                                             |                  |                     | 25-207                                        | 45-184    |                                     |          |
| TH-corticosterone                 |                                                                                                                                                                                                                                             |                  |                     | 26-262                                        | 32-238    | <360                                | 10-410   |
| 5α-TH-corticosterone              |                                                                                                                                                                                                                                             |                  |                     | 49-447                                        | 135-588   | <422                                | 80-570   |
| <b>Mineralocorticoids</b>         |                                                                                                                                                                                                                                             |                  |                     |                                               |           |                                     |          |
| TH-aldosterone                    |                                                                                                                                                                                                                                             |                  |                     | 6-63                                          | 10-58     |                                     |          |
| TH-11-deoxycortisol               |                                                                                                                                                                                                                                             |                  |                     | 17-117                                        | 10-109    |                                     |          |
| <b>Glucocorticoids</b>            |                                                                                                                                                                                                                                             |                  |                     |                                               |           |                                     |          |
| cortisol                          |                                                                                                                                                                                                                                             |                  |                     | 25-115                                        | 35-168    |                                     |          |
| 6β-OH-cortisol                    |                                                                                                                                                                                                                                             |                  |                     | 53-416                                        | 122-487   |                                     |          |
| 18-OH-cortisol                    |                                                                                                                                                                                                                                             |                  |                     |                                               |           |                                     |          |
| 20α-DH-cortisol                   |                                                                                                                                                                                                                                             |                  |                     |                                               |           |                                     |          |
| TH-cortisol                       | 830 [480-950]                                                                                                                                                                                                                               | 1080 [1025-1350] | 0.0007              | 458-1907                                      | 942-2800  | 250-1510                            | 310-2240 |
| α-cortol                          | 200 [147-262]                                                                                                                                                                                                                               | 265 [215-365]    | 0.05                | 122-365                                       | 96-509    | 70-340                              | 60-700   |
| α-cortolone                       | 730 [350-910]                                                                                                                                                                                                                               | 770 [717-917]    | 0.1                 | 457-1564                                      | 449-2044  | 140-1210                            | <1520    |
| β-cortol                          |                                                                                                                                                                                                                                             |                  |                     | 124-690                                       | 196-880   |                                     |          |
| β-cortolone                       | 765 [490-820]#                                                                                                                                                                                                                              | 1040 [890-1102]# | 0.002               | 216-814                                       | 231-1534  | <1100                               | 150-1590 |
| 11β-OH-etiocholanolone            | 160 [112-207]                                                                                                                                                                                                                               | 140 [97-332]     | 0.39                | 14-687                                        | 18-1034   | 20-650                              | <1540    |
| allo-TH-cortisol                  | 400 [270-530]                                                                                                                                                                                                                               | 830 [607-925]    | 0.0002              | 142-1589                                      | 796-2456  | 90-920                              | 190-2220 |
| cortisone                         |                                                                                                                                                                                                                                             |                  |                     | 49-215                                        | 92-366    |                                     |          |
| 20α-DH-cortisone                  |                                                                                                                                                                                                                                             |                  |                     |                                               |           |                                     |          |
| 20β-DH-cortisone                  |                                                                                                                                                                                                                                             |                  |                     |                                               |           |                                     |          |
| TH-cortisone                      | 1485 [1140-1990]                                                                                                                                                                                                                            | 2290 [2115-2715] | 0.001               | 727-3815                                      | 1365-5788 | 370-3510                            | 570-5700 |
| 11-keto-androsterone              |                                                                                                                                                                                                                                             |                  |                     |                                               |           |                                     |          |
| 11-keto-etiocholanolone           |                                                                                                                                                                                                                                             |                  |                     | 57-916                                        | 79-1026   | 30-610                              | <1280    |
| <b>Creatinine, mmol/24h</b>       |                                                                                                                                                                                                                                             |                  |                     |                                               |           |                                     |          |

Abbreviations: GC, gas chromatography; MS, mass spectrometry; F, female; M, male; d, days; y, years.

Supporting Table 1. (continued)

| Author, y, reference              | Chan et al.,<br>2008, (11)                                                                                                                                                                                                                                                                                                                                                                                                           |                 |                 |                |                                   |                   |                    |                  |
|-----------------------------------|--------------------------------------------------------------------------------------------------------------------------------------------------------------------------------------------------------------------------------------------------------------------------------------------------------------------------------------------------------------------------------------------------------------------------------------|-----------------|-----------------|----------------|-----------------------------------|-------------------|--------------------|------------------|
| Sex                               | F                                                                                                                                                                                                                                                                                                                                                                                                                                    |                 |                 |                | M                                 |                   |                    |                  |
| Age (y)                           | 44.7 ±13.1 (mean±SD), range 20-85                                                                                                                                                                                                                                                                                                                                                                                                    |                 |                 |                | 41.6 ±12.9 (mean±SD), range 23-78 |                   |                    |                  |
| Number of subjects                | 89                                                                                                                                                                                                                                                                                                                                                                                                                                   |                 |                 |                | 83                                |                   |                    |                  |
| Type of data                      | Median [2.5 <sup>th</sup> -97.5 <sup>th</sup> percentile]<br>(in the original publication also the 25 <sup>th</sup> and 75 <sup>th</sup> percentile are provided)                                                                                                                                                                                                                                                                    |                 |                 |                |                                   |                   |                    |                  |
| Measuring unit                    | µg/24h                                                                                                                                                                                                                                                                                                                                                                                                                               |                 |                 |                |                                   |                   |                    |                  |
| Analysis method                   | GC-MS                                                                                                                                                                                                                                                                                                                                                                                                                                |                 |                 |                |                                   |                   |                    |                  |
| Population                        | Staff of the Department of Pathology, Queen Elizabeth Hospital, Hong Kong, their families, relatives and friends. Exclusion criteria included tobacco smoking, alcohol consumption (>14 units/week in female, >21 units/week in male), acute or chronic medical or mental illnesses, known malignancies, use of chronic medications, herbs or vitamin supplements, pregnant or lactating women and miscarriage in the last 3 months. |                 |                 |                |                                   |                   |                    |                  |
| Subgroups                         | All<br>n=84-89                                                                                                                                                                                                                                                                                                                                                                                                                       | < 40 y<br>n=29  | 40-59 y<br>n=29 | ≥ 60 y<br>n=29 | All<br>n=81-83                    | < 40 y<br>n=41-43 | 40-59 y<br>n=29-30 | ≥ 60 y<br>n=10   |
| <b>Progesterones</b>              |                                                                                                                                                                                                                                                                                                                                                                                                                                      |                 |                 |                |                                   |                   |                    |                  |
| 17α-OH-pregnanolone               | 61 [16-295]                                                                                                                                                                                                                                                                                                                                                                                                                          |                 |                 |                | 146 [54-365]                      | 165 [67-372]      | 134 [50-289]       | 107 [38-267]     |
| pregnanetriol                     | 272 [81-1152]                                                                                                                                                                                                                                                                                                                                                                                                                        |                 |                 |                | 540 [228-1297]                    | 665 [284-1471]    | 476 [219-970]      | 346 [185-718]    |
| pregnenetriol                     | 82 [15-344]                                                                                                                                                                                                                                                                                                                                                                                                                          |                 |                 |                | 283 [38-925]                      | 363 [107-976]     | 347 [54-764]       | 118 [25-256]     |
| pregnanetriolone                  | 6 <1-44]                                                                                                                                                                                                                                                                                                                                                                                                                             |                 |                 |                | 7 <1-39]                          |                   |                    |                  |
| pregnanediol                      | 173 [48-2899]                                                                                                                                                                                                                                                                                                                                                                                                                        |                 |                 |                | 182 [58-457]                      | 222 [75-476]      | 180 [57-331]       | 106 [41-348]     |
| <b>Androgens</b>                  |                                                                                                                                                                                                                                                                                                                                                                                                                                      |                 |                 |                |                                   |                   |                    |                  |
| dehydroepiandrosterone            | 114 [7-1672]                                                                                                                                                                                                                                                                                                                                                                                                                         |                 |                 |                | 885 [32-3657]                     | 1152 [164-3657]   | 889 [49-3105]      | 167 [15-1214]    |
| 16α-OH-dehydroepiandrosterone     | 213 [28-1114]                                                                                                                                                                                                                                                                                                                                                                                                                        |                 |                 |                | 483 [67-1376]                     | 535 [253-379]     | 486 [91-670]       | 626 [17-322]     |
| androstenediol                    | 38 [7-211]                                                                                                                                                                                                                                                                                                                                                                                                                           |                 |                 |                | 173 [14-626]                      | 233 [51-833]      | 151 [20-496]       | 25 [10-99]       |
| androstetriol                     | 199 [41-475]                                                                                                                                                                                                                                                                                                                                                                                                                         |                 |                 |                | 392 [143-954]                     |                   |                    |                  |
| testosterone                      |                                                                                                                                                                                                                                                                                                                                                                                                                                      |                 |                 |                |                                   |                   |                    |                  |
| 5α-DH-testosterone                |                                                                                                                                                                                                                                                                                                                                                                                                                                      |                 |                 |                |                                   |                   |                    |                  |
| androstaneol                      |                                                                                                                                                                                                                                                                                                                                                                                                                                      |                 |                 |                |                                   |                   |                    |                  |
| androsterone                      | 738 [127-1898]                                                                                                                                                                                                                                                                                                                                                                                                                       | 1083 [431-2037] | 684 [143-1765]  | 533 [100-919]  | 1805 [410-3498]                   | 2312 [792-3514]   | 2195 [589-3105]    | 957 [343-2372]   |
| 11β-OH-androsterone               | 453 [136-944]                                                                                                                                                                                                                                                                                                                                                                                                                        |                 |                 |                | 763 [233-1822]                    | 776 [233-1618]    | 904 [318-1898]     | 527 [311-1059]   |
| etiocholanolone                   | 745 [184-1466]                                                                                                                                                                                                                                                                                                                                                                                                                       |                 |                 |                | 1215 [437-2802]                   | 1374 [577-2802]   | 1169 [586-2637]    | 828 [235-1362]   |
| <b>Estrogens</b>                  |                                                                                                                                                                                                                                                                                                                                                                                                                                      |                 |                 |                |                                   |                   |                    |                  |
| 17β-estradiol                     |                                                                                                                                                                                                                                                                                                                                                                                                                                      |                 |                 |                |                                   |                   |                    |                  |
| estriol                           |                                                                                                                                                                                                                                                                                                                                                                                                                                      |                 |                 |                |                                   |                   |                    |                  |
| <b>Corticosterones</b>            |                                                                                                                                                                                                                                                                                                                                                                                                                                      |                 |                 |                |                                   |                   |                    |                  |
| TH-11-deoxycorticosterone         |                                                                                                                                                                                                                                                                                                                                                                                                                                      |                 |                 |                |                                   |                   |                    |                  |
| TH-11-dehydrocorticosterone       | 59 [19-141]                                                                                                                                                                                                                                                                                                                                                                                                                          |                 |                 |                | 97 [31-255]                       | 115 [41-255]      | 95 [29-167]        | 72 [31-228]      |
| 18-OH-TH-11-dehydrocorticosterone |                                                                                                                                                                                                                                                                                                                                                                                                                                      |                 |                 |                |                                   |                   |                    |                  |
| TH-corticosterone                 | 58 [19-123]                                                                                                                                                                                                                                                                                                                                                                                                                          |                 |                 |                | 99 [36-248]                       | 108 [41-251]      | 100 [36-161]       | 75 [31-198]      |
| 5α-TH-corticosterone              | 102 [36-242]                                                                                                                                                                                                                                                                                                                                                                                                                         |                 |                 |                | 216 [58-610]                      | 251 [58-653]      | 204 [49-402]       | 170 [79-311]     |
| <b>Mineralocorticoids</b>         |                                                                                                                                                                                                                                                                                                                                                                                                                                      |                 |                 |                |                                   |                   |                    |                  |
| TH-aldosterone                    |                                                                                                                                                                                                                                                                                                                                                                                                                                      |                 |                 |                |                                   |                   |                    |                  |
| TH-11-deoxycortisol               | 19 [9-59]                                                                                                                                                                                                                                                                                                                                                                                                                            |                 |                 |                | 31 [10-90]                        |                   |                    |                  |
| <b>Glucocorticoids</b>            |                                                                                                                                                                                                                                                                                                                                                                                                                                      |                 |                 |                |                                   |                   |                    |                  |
| cortisol                          | 17 [6-38]                                                                                                                                                                                                                                                                                                                                                                                                                            |                 |                 |                | 28 [10-72]                        |                   |                    |                  |
| 6β-OH-cortisol                    |                                                                                                                                                                                                                                                                                                                                                                                                                                      |                 |                 |                |                                   |                   |                    |                  |
| 18-OH-cortisol                    |                                                                                                                                                                                                                                                                                                                                                                                                                                      |                 |                 |                |                                   |                   |                    |                  |
| 20α-DH-cortisol                   |                                                                                                                                                                                                                                                                                                                                                                                                                                      |                 |                 |                |                                   |                   |                    |                  |
| TH-cortisol                       | 719 [307-1445]                                                                                                                                                                                                                                                                                                                                                                                                                       |                 |                 |                | 1161 [527-2350]                   |                   |                    |                  |
| α-cortol                          | 154 [63-326]                                                                                                                                                                                                                                                                                                                                                                                                                         |                 |                 |                | 217 [79-486]                      |                   |                    |                  |
| α-cortolone                       | 766 [255-1364]                                                                                                                                                                                                                                                                                                                                                                                                                       |                 |                 |                | 1097 [549-2484]                   |                   |                    |                  |
| β-cortol                          | 223 [61-561]                                                                                                                                                                                                                                                                                                                                                                                                                         |                 |                 |                | 315 [107-841]                     |                   |                    |                  |
| β-cortolone                       | 320 [93-693]                                                                                                                                                                                                                                                                                                                                                                                                                         |                 |                 |                | 468 [207-1146]                    | 520 [220-1391]    | 493 [237-771]      | 312 [204-573]    |
| 11β-OH-etiocholanolone            | 66 [9-357]                                                                                                                                                                                                                                                                                                                                                                                                                           |                 |                 |                | 117 [21-503]                      | 142 [17-572]      | 213 [26-482]       | 152 [24-321]     |
| allo-TH-cortisol                  | 654 [145-1620]                                                                                                                                                                                                                                                                                                                                                                                                                       |                 |                 |                | 1625 [413-4353]                   | 1834 [422-4959]   | 1848 [299-3283]    | 1223 [465-1855]  |
| cortisone                         |                                                                                                                                                                                                                                                                                                                                                                                                                                      |                 |                 |                |                                   |                   |                    |                  |
| 20α-DH-cortisone                  |                                                                                                                                                                                                                                                                                                                                                                                                                                      |                 |                 |                |                                   |                   |                    |                  |
| 20β-DH-cortisone                  |                                                                                                                                                                                                                                                                                                                                                                                                                                      |                 |                 |                |                                   |                   |                    |                  |
| TH-cortisone                      | 1753 [547-3117]                                                                                                                                                                                                                                                                                                                                                                                                                      |                 |                 |                | 2825 [1239-6367]                  | 3051 [1253-6409]  | 3117 [1301-4917]   | 1740 [1202-3293] |
| 11-keto-androsterone              |                                                                                                                                                                                                                                                                                                                                                                                                                                      |                 |                 |                |                                   |                   |                    |                  |
| 11-keto-etiocholanolone           | 97 [6-437]                                                                                                                                                                                                                                                                                                                                                                                                                           |                 |                 |                | 168 [37-541]                      | 177 [41-622]      | 240 [51-486]       | 79 [36-295]      |

Abbreviations: GC, gas chromatography; MS, mass spectrometry; F, female; M: male; d, days; y, years.

Supporting Table 1. (continued)

| Author, y, reference              | de Jong et al.,<br>2017, (12)                                                                                                                                                                                                                                       |                 |                 |                 |                 |                 |                  |                  |                 |                 |                 |                 |
|-----------------------------------|---------------------------------------------------------------------------------------------------------------------------------------------------------------------------------------------------------------------------------------------------------------------|-----------------|-----------------|-----------------|-----------------|-----------------|------------------|------------------|-----------------|-----------------|-----------------|-----------------|
|                                   | F                                                                                                                                                                                                                                                                   |                 |                 |                 |                 |                 | M                |                  |                 |                 |                 |                 |
| Sex                               |                                                                                                                                                                                                                                                                     |                 |                 |                 |                 |                 |                  |                  |                 |                 |                 |                 |
| Age (y)                           | 20-29                                                                                                                                                                                                                                                               | 30-39           | 40-49           | 50-59           | 60-69           | 70-79           | 20-29            | 30-39            | 40-49           | 50-59           | 60-69           | 70-79           |
| Number of subjects                | 20                                                                                                                                                                                                                                                                  | 20              | 20              | 20              | 20              | 20              | 20               | 20               | 20              | 20              | 20              | 20              |
| Type of data                      | Mean or *Median [2.5 <sup>th</sup> -97.5 <sup>th</sup> percentile]                                                                                                                                                                                                  |                 |                 |                 |                 |                 |                  |                  |                 |                 |                 |                 |
| Measuring unit                    | µmol/24h                                                                                                                                                                                                                                                            |                 |                 |                 |                 |                 |                  |                  |                 |                 |                 |                 |
| Analysis method                   | GC-MS/MS                                                                                                                                                                                                                                                            |                 |                 |                 |                 |                 |                  |                  |                 |                 |                 |                 |
| Population                        | healthy, no medication, body mass index 21-30 kg/m <sup>2</sup> , selected from the LifeLines Cohort Study, a large population based cohort study in which inhabitants of the northern part of The Netherlands and their families were invited to participate, (13) |                 |                 |                 |                 |                 |                  |                  |                 |                 |                 |                 |
| Subgroups                         | -                                                                                                                                                                                                                                                                   | -               | -               | -               | -               | -               | -                | -                | -               | -               | -               | -               |
| <b>Progesterones</b>              |                                                                                                                                                                                                                                                                     |                 |                 |                 |                 |                 |                  |                  |                 |                 |                 |                 |
| 17α-OH-pregnanolone               |                                                                                                                                                                                                                                                                     |                 |                 |                 |                 |                 |                  |                  |                 |                 |                 |                 |
| pregnanetriol                     | 2.1* [0.6-5.7]                                                                                                                                                                                                                                                      | 2.7* [0.7-6.5]  | 2.6 [0.1-5.3]   | 1.1* [0.5-2.6]  | 1.0* [0.5-2.7]  | 1 [0.2-1.8]     | 4.3* [2.2-8.4]   | 3.3 [0.6-6.0]    | 3.3 [1.2-5.3]   | 2.8* [1.4-6.4]  | 2.2* [1.0-6.5]  | 2.6* [1.3-5.2]  |
| pregnenetriol                     | 0.8* [0.1-2.2]                                                                                                                                                                                                                                                      | 0.5* [0.0-2.8]  | 0.3* [0.0-1.1]  | 0.2* [0.0-0.7]  | 0.2* [0.0-0.4]  | 0.1* [0.0-0.4]  | 2 [0.1-4.0]      | 1.1* [0.2-3.9]   | 1.2 [0.2-2.3]   | 0.8 [0.1-1.7]   | 0.5* [0.1-1.3]  | 0.8 [0.1-1.5]   |
| pregnanetriolone                  | 0.04* [0.0-0.2]                                                                                                                                                                                                                                                     | 0.03* [0.0-0.2] | <0.1 [<0.1]     | <0.1 [<0.1]     | 0.06* [0.0-0.4] | 0.05* [0.0-0.3] | <0.1 [<0.1]      | <0.1 [<0.1]      | 0.05* [0.0-0.2] | 0.06* [0.0-0.2] | 0.06* [0.0-0.4] | 0.07* [0.0-0.2] |
| pregnanediol                      | 1.5* [0.3-14.2]                                                                                                                                                                                                                                                     | 2.2* [0.4-21.9] | 1.6* [0.2-25.6] | 0.6* [0.2-1.4]  | 0.7* [0.2-1.7]  | 0.6 [0.1-1.2]   | 1.3* [0.6-3.7]   | 1.0* [0.3-2.4]   | 1.0* [0.5-2.2]  | 0.8* [0.3-2.6]  | 0.8* [0.2-2.4]  | 1.1 [0.1-2.0]   |
| <b>Androgens</b>                  |                                                                                                                                                                                                                                                                     |                 |                 |                 |                 |                 |                  |                  |                 |                 |                 |                 |
| dehydroepiandrosterone            | 1.2* [0.2-11.8]                                                                                                                                                                                                                                                     | 0.8* [0.1-12.2] | 0.7* [0.1-5.7]  | 0.3* [0.2-1.0]  | 0.3* [0.1-0.8]  | 0.2* [0.0-0.6]  | 6.6* [0.5-41.2]  | 1.5* [0.2-17.3]  | 2.6* [0.6-12.9] | 1.1* [0.2-7.0]  | 0.6* [0.2-3.2]  | 0.9* [0.1-7.8]  |
| 16α-OH-dehydroepiandrosterone     | 1.7 [0.1-3.4]                                                                                                                                                                                                                                                       | 1.0* [0.1-5.0]  | 0.6* [0.2-3.3]  | 0.3* [0.0-1.5]  | 0.2* [0.0-1.1]  | 0.2* [0.0-0.5]  | 4.2* [1.2-11.3]  | 2.0* [0.2-12.6]  | 1.9 [0.4-3.4]   | 1.2* [0.1-4.2]  | 0.7* [0.1-3.2]  | 1.0* [0.2-4.6]  |
| androstenediol                    | 1.1* [0.3-5.8]                                                                                                                                                                                                                                                      | 1.1* [0.2-2.8]  | 0.9* [0.3-2.4]  | 0.6 [0.1-1.1]   | 0.5* [0.1-1.9]  | 0.4 [0.0-0.8]   | 2.5* [1.0-9.6]   | 2.2* [0.5-9.9]   | 2.1* [0.5-5.1]  | 1.4* [0.5-4.4]  | 1.3 [0.1-3.0]   | 1.2* [0.5-3.4]  |
| testosterone                      |                                                                                                                                                                                                                                                                     |                 |                 |                 |                 |                 |                  |                  |                 |                 |                 |                 |
| 5α-DH-testosterone                |                                                                                                                                                                                                                                                                     |                 |                 |                 |                 |                 |                  |                  |                 |                 |                 |                 |
| androstanediol                    |                                                                                                                                                                                                                                                                     |                 |                 |                 |                 |                 |                  |                  |                 |                 |                 |                 |
| androsterone                      | 6.7* [2.8-20.8]                                                                                                                                                                                                                                                     | 8 [0.1-17.3]    | 5.2* [2.1-15.4] | 2.7* [1.1-7.0]  | 2.5* [0.5-8.8]  | 1.9* [0.3-6.0]  | 21.6 [6.8-36.4]  | 13.7* [6.4-29.0] | 14 [5.5-22.7]   | 10.4 [3.2-17.6] | 6.8* [3.5-14.7] | 6.8 [2.6-11.0]  |
| 11β-OH-androsterone               | 1.7* [0.6-6.3]                                                                                                                                                                                                                                                      | 2.2* [0.6-6.0]  | 2.9 [0.6-5.2]   | 2.3* [1.0-5.3]  | 2.5 [0.3-4.8]   | 2.8 [0.3-5.0]   | 5.3 [1.1-9.5]    | 4 [1.1-6.9]      | 4.8 [2.3-7.2]   | 4.2* [2.2-8.1]  | 4.5 [0.9-8.2]   | 4.4 [1.6-7.3]   |
| etiocholanolone                   | 8.1 [1.8-14.4]                                                                                                                                                                                                                                                      | 7.3 [1.4-13.2]  | 6.2* [2.6-17.7] | 4.2 [0.9-7.4]   | 3.3* [1.2-9.7]  | 2.5* [0.8-7.6]  | 13.5* [5.0-39.9] | 8.6 [0.3-16.9]   | 9.6 [3.1-16.1]  | 8.6 [1.2-16.1]  | 7.3 [1.5-13.0]  | 7 [1.2-12.1]    |
| <b>Estrogens</b>                  |                                                                                                                                                                                                                                                                     |                 |                 |                 |                 |                 |                  |                  |                 |                 |                 |                 |
| 17β-estradiol                     |                                                                                                                                                                                                                                                                     |                 |                 |                 |                 |                 |                  |                  |                 |                 |                 |                 |
| estril                            | <0.1 [<0.1]                                                                                                                                                                                                                                                         | <0.1 [<0.1]     | <0.1 [<0.1]     | <0.1 [<0.1]     | <0.1 [<0.1]     | <0.1 [<0.1]     | <0.1 [<0.1]      | <0.1 [<0.1]      | <0.1 [<0.1]     | <0.1 [<0.1]     | <0.1 [<0.1]     | <0.1 [<0.1]     |
| <b>Corticosterones</b>            |                                                                                                                                                                                                                                                                     |                 |                 |                 |                 |                 |                  |                  |                 |                 |                 |                 |
| TH-11-deoxycorticosterone         | <0.1 [<0.1]                                                                                                                                                                                                                                                         | <0.1 [<0.1]     | <0.1 [<0.1]     | <0.1 [<0.1]     | <0.1 [<0.1]     | <0.1 [<0.1]     | <0.1 [≤0.1]      | <0.1 [<0.1]      | <0.1 [<0.1]     | <0.1 [<0.1]     | <0.1 [≤0.1]     | <0.1 [<0.1]     |
| TH-11-dehydrocorticosterone       | 0.3* [0.1-1.3]                                                                                                                                                                                                                                                      | 0.3 [0.0-0.5]   | 0.3* [0.2-0.6]  | 0.3* [0.1-0.8]  | 0.3* [0.1-0.9]  | 0.3* [0.0-0.8]  | 0.6 [0.1-1.1]    | 0.4* [0.1-1.1]   | 0.4 [0.1-0.8]   | 0.5 [0.1-0.9]   | 0.4* [0.0-1.1]  | 0.5 [0.1-0.9]   |
| 18-OH-TH-11-dehydrocorticosterone |                                                                                                                                                                                                                                                                     |                 |                 |                 |                 |                 |                  |                  |                 |                 |                 |                 |
| TH-corticosterone                 | 0.4* [0.1-1.3]                                                                                                                                                                                                                                                      | 0.4* [0.1-0.8]  | 0.4 [0.2-0.7]   | 0.4* [0.2-0.9]  | 0.4* [0.1-1.3]  | 0.4* [0.2-1.0]  | 0.6* [0.3-1.4]   | 0.5 [0.1-1.1]    | 0.5* [0.2-1.1]  | 0.5* [0.2-1.3]  | 0.56* [0.1-1.7] | 0.7 [0.2-1.3]   |
| 5α-TH-corticosterone              | 0.8* [0.2-3.5]                                                                                                                                                                                                                                                      | 0.8 [0.1-1.5]   | 0.8 [0.2-1.3]   | 0.5* [0.2-1.5]  | 0.6 [0.2-1.0]   | 0.6* [0.2-1.7]  | 1.8 [0.3-3.3]    | 1.7 [0.1-3.4]    | 1.5 [0.3-2.7]   | 1.3* [0.6-3.2]  | 1.0* [0.3-3.4]  | 1.6 [0.1-3.0]   |
| <b>Mineralocorticoids</b>         |                                                                                                                                                                                                                                                                     |                 |                 |                 |                 |                 |                  |                  |                 |                 |                 |                 |
| TH-aldoosterone                   |                                                                                                                                                                                                                                                                     |                 |                 |                 |                 |                 |                  |                  |                 |                 |                 |                 |
| TH-11-deoxycortisol               | 0.1* [0.0-0.3]                                                                                                                                                                                                                                                      | 0.2* [0.0-0.3]  | 0.2* [0.1-0.4]  | 0.2* [0.0-0.6]  | 0.2* [0.1-0.7]  | 0.2* [0.0-0.6]  | 0.2* [0.0-0.6]   | 0.2* [0.0-0.4]   | 0.2 [0.0-0.3]   | 0.2 [0.0-0.5]   | 0.3* [0.1-0.7]  | 0.3* [0.1-0.7]  |
| <b>Glucocorticoids</b>            |                                                                                                                                                                                                                                                                     |                 |                 |                 |                 |                 |                  |                  |                 |                 |                 |                 |
| cortisol                          |                                                                                                                                                                                                                                                                     |                 |                 |                 |                 |                 |                  |                  |                 |                 |                 |                 |
| 6β-OH-cortisol                    |                                                                                                                                                                                                                                                                     |                 |                 |                 |                 |                 |                  |                  |                 |                 |                 |                 |
| 18-OH-cortisol                    |                                                                                                                                                                                                                                                                     |                 |                 |                 |                 |                 |                  |                  |                 |                 |                 |                 |
| 20α-DH-cortisol                   |                                                                                                                                                                                                                                                                     |                 |                 |                 |                 |                 |                  |                  |                 |                 |                 |                 |
| TH-cortisol                       | 4.1 [1.0-7.1]                                                                                                                                                                                                                                                       | 4.2* [2.2-8.7]  | 4.5* [2.8-8.0]  | 4.7 [1.8-7.7]   | 5.4* [2.6-12.7] | 6.1 [2.2-10.0]  | 6.9* [3.5-13.5]  | 6.5 [3.1-10.0]   | 7.2 [3.8-10.6]  | 7.9 [2.5-13.4]  | 8.2* [3.9-16.0] | 9.7 [4.0-15.3]  |
| α-cortol                          | 0.6 [0.1-1.1]                                                                                                                                                                                                                                                       | 0.5 [0.3-1.3]   | 0.6 [0.3-1.0]   | 0.5* [0.3-1.2]  | 0.7* [0.3-1.4]  | 0.9 [0.3-1.4]   | 0.8* [0.5-1.7]   | 0.7* [0.5-1.2]   | 0.9 [0.5-1.2]   | 0.8* [0.4-1.6]  | 1 [0.2-1.8]     | 1.2 [0.3-2.1]   |
| α-cortolone                       | 4.1 [0.9-7.4]                                                                                                                                                                                                                                                       | 3.3* [1.5-7.4]  | 3.9 [1.3-6.6]   | 3.7 [0.9-6.4]   | 3.5* [2.1-7.1]  | 4.7 [1.8-7.5]   | 5.4 [2.2-8.5]    | 4.3* [2.7-6.7]   | 4.8 [2.8-6.7]   | 4.6 [1.9-7.3]   | 5 [1.5-8.6]     | 5.2 [2.1-8.3]   |
| β-cortol                          |                                                                                                                                                                                                                                                                     |                 |                 |                 |                 |                 |                  |                  |                 |                 |                 |                 |
| β-cortolone                       | 1.7 [0.1-3.3]                                                                                                                                                                                                                                                       | 1.6 [0.4-2.8]   | 1.6* [0.7-4.0]  | 1.5* [0.8-3.2]  | 1.6* [0.8-3.1]  | 2.1 [0.7-3.5]   | 2.7* [1.4-6.1]   | 2.7 [0.9-4.5]    | 2.7 [1.0-4.5]   | 2.7 [0.9-4.5]   | 2.5* [1.3-4.8]  | 2.5 [0.9-4.1]   |
| 11β-OH-etiocholanolone            | 1.2 [0.1-2.3]                                                                                                                                                                                                                                                       | 1.3* [0.3-3.8]  | 1.6 [0.2-3.1]   | 1.6 [0.2-3.0]   | 1 [0.1-2.1]     | 1.4* [0.4-4.7]  | 1.9 [0.1-4.0]    | 1.6* [0.0-4.7]   | 1.9 [0.1-4.1]   | 2 [0.1-4.6]     | 1.4* [0.2-6.3]  | 1.9* [0.5-7.6]  |
| allo-TH-cortisol                  | 3.2* [0.4-10.4]                                                                                                                                                                                                                                                     | 3.6 [0.1-7.6]   | 3.1 [0.9-5.4]   | 2.4* [1.1-6.3]  | 2.8 [0.7-4.8]   | 2.3* [0.5-9.0]  | 7.4* [2.5-21.6]  | 8.5 [1.8-15.3]   | 8.3 [3.9-12.8]  | 7.1* [3.3-14.7] | 5.9* [3.0-13.2] | 7 [1.6-12.4]    |
| cortisone                         |                                                                                                                                                                                                                                                                     |                 |                 |                 |                 |                 |                  |                  |                 |                 |                 |                 |
| 20α-DH-cortisone                  |                                                                                                                                                                                                                                                                     |                 |                 |                 |                 |                 |                  |                  |                 |                 |                 |                 |
| 20β-DH-cortisone                  |                                                                                                                                                                                                                                                                     |                 |                 |                 |                 |                 |                  |                  |                 |                 |                 |                 |
| TH-cortisone                      | 7.8* [3.1-23.4]                                                                                                                                                                                                                                                     | 8.5 [2.6-14.4]  | 9.2* [4.7-18.2] | 8.3* [4.5-18.4] | 9.1* [4.8-19.4] | 11.1 [3.4-18.8] | 15.2 [5.0-25.3]  | 12.9* [6.5-24.7] | 14 [7.1-20.9]   | 14.7 [5.1-24.2] | 14.2 [5.4-23.0] | 14.1 [5.6-22.6] |
| 11-keto-androsterone              |                                                                                                                                                                                                                                                                     |                 |                 |                 |                 |                 |                  |                  |                 |                 |                 |                 |
| 11-keto-etiocholanolone           | 1.0* [0.4-3.1]                                                                                                                                                                                                                                                      | 1.1* [0.5-2.8]  | 1.6 [0.1-3.1]   | 1.4* [0.6-3.9]  | 1.5* [0.4-3.6]  | 1.9 [0.5-3.8]   | 1.8 [0.1-3.6]    | 1.6 [0.1-3.5]    | 1.7 [0.1-3.4]   | 1.8* [0.4-5.2]  | 1.9* [0.5-4.8]  | 1.7* [0.4-4.6]  |
| Creatinine, mmol/24h              |                                                                                                                                                                                                                                                                     |                 |                 |                 |                 |                 |                  |                  |                 |                 |                 |                 |

\*Median

Abbreviations: GC, gas chromatography; MS, mass spectrometry; F, female; M: male; d, days; y, years.

## References

1. Shackleton CH. Profiling steroid hormones and urinary steroids. *Journal of chromatography*. 1986;379:91-156.
2. Bevan BR, Savvas M, Jenkins JM, Baker K, Pennington GW, Taylor NF. Abnormal steroid excretion in gestational trophoblastic disease complicated by ovarian theca-lutein cysts. *Journal of clinical pathology*. 1986;39(6):627-34.
3. Weykamp CW, Penders TJ, Schmidt NA, Borburgh AJ, van de Calseyde JF, Wolthers BJ. Steroid profile for urine: reference values. *Clinical chemistry*. 1989;35(12):2281-4.
4. Shackleton CH. Mass spectrometry in the diagnosis of steroid-related disorders and in hypertension research. *The Journal of steroid biochemistry and molecular biology*. 1993;45(1-3):127-40.
5. Finken MJ, Andrews RC, Andrew R, Walker BR. Cortisol metabolism in healthy young adults: sexual dimorphism in activities of A-ring reductases, but not 11beta-hydroxysteroid dehydrogenases. *The Journal of clinical endocrinology and metabolism*. 1999;84(9):3316-21.
6. Shamim W, Yousufuddin M, Bakhai A, Coats AJ, Honour JW. Gender differences in the urinary excretion rates of cortisol and androgen metabolites. *Annals of clinical biochemistry*. 2000;37 ( Pt 6):770-4.
7. Shackleton CHJM. Hyphenated Methods. *The Encyclopedia of Mass Spectrometry*. 82006.
8. Shackleton C. Genetic Disorders of Steroid Metabolism Diagnosed by Mass Spectrometry. In: Blau N, Duran M, Gibson KM, editors. *Laboratory Guide to the Methods in Biochemical Genetics*: Springer Berlin Heidelberg; 2008. p. 549-605.
9. Taylor NF. Urinary Steroid Profiling. In: Wheeler MJ, Hutchinson JSM, editors. *Methods in Molecular Biology: Hormone Assays in Biological Fluids*. Totowa, NJ: Humana Press Inc.; 2006. p. 159-75.
10. Taylor NF. Urinary steroid profiling. *Methods in molecular biology (Clifton, NJ)*. 2013;1065:259-76.
11. Chan AO, Taylor NF, Tiu SC, Shek CC. Reference intervals of urinary steroid metabolites using gas chromatography-mass spectrometry in Chinese adults. *Steroids*. 2008;73(8):828-37.
12. de Jong WHA, Buitenwerf E, Pranger AT, Riphagen IJ, Wolffenbuttel BHR, Kerstens MN, et al. Determination of reference intervals for urinary steroid profiling using a newly validated GC-MS/MS method. *Clinical chemistry and laboratory medicine : CCLM / FESCC*. 2017;56(1):103-12.
13. Scholtens S, Smidt N, Swertz MA, Bakker SJ, Dotinga A, Vonk JM, et al. Cohort Profile: LifeLines, a three-generation cohort study and biobank. *International journal of epidemiology*. 2015;44(4):1172-80.
