# Supplementary material for: Reference intervals for the urinary steroid metabolome: The impact of sex, age, day and night time on human adult steroidogenesis
Source: PubMed Central journal article supplement (PMC6440635; doi:10.1371/journal.pone.0214549), 2019-03-29
Supplement: pone.0214549.s006.pdf [file pone.0214549.s006.pdf]

**Supporting Table 2. Baseline characteristics of the reference sample group.**

| Characteristics                              | Reference sample group |                   |     |                 | <i>p</i> |
|----------------------------------------------|------------------------|-------------------|-----|-----------------|----------|
|                                              | N                      | Men               | N   | Women           |          |
| Male                                         | 459                    | 54.8%             | 379 | 45.2%           | -        |
| Age, y                                       | 459                    | 47.7±17.6         | 379 | 51.2±16.1       | 0.0054   |
| Body mass index, kg/m <sup>2</sup>           | 459                    | 25.4;22.9-28.1    | 378 | 23.8;21.4-26.5  | <0.001   |
| Current smoker                               | 130                    | 28.3%             | 71  | 18.7%           | 0.001    |
| Hypertension                                 | 126                    | 27.5%             | 75  | 19.8%           | 0.01     |
| Diabetes                                     | 29                     | 6.3%              | 10  | 2.6%            | 0.012    |
| <b>Blood values</b>                          |                        |                   |     |                 |          |
| Sodium, mmol/L                               | 454                    | 141;139-142       | 378 | 141;139-143     | 0.10     |
| Potassium, mmol/L                            | 454                    | 4.1;3.9-4.3       | 378 | 4;3.8-4.2       | 0.0039   |
| Chloride, mmol/L                             | 453                    | 105;103-107       | 378 | 105;103-107     | 0.10     |
| Calcium total, mmol/L                        | 454                    | 2.29;2.24-2.34    | 377 | 2.29;2.23-2.35  | 0.65     |
| Phosphate, mmol/L                            | 453                    | 0.99±0.16         | 377 | 1.09±0.16       | <0.001   |
| Creatinine, µmol/L                           | 454                    | 81.8±13.8         | 378 | 66.2±10.4       | <0.001   |
| eGFR CKD-EPI, mL/min per 1.73 m <sup>2</sup> | 454                    | 98.2;85.8-110     | 378 | 93.5;82.4-103   | <0.001   |
| Urea, mmol/L                                 | 454                    | 5.15;4.2-6.2      | 378 | 4.5;3.73-5.5    | <0.001   |
| Uric acid, mmol/L                            | 454                    | 351;308-391       | 378 | 260;224-302     | <0.001   |
| Glucose fasting, mmol/L                      | 454                    | 5.2;4.9-5.7       | 378 | 5;4.61-5.3      | <0.001   |
| Albumine, g/L                                | 454                    | 40;37-44          | 376 | 40;36-44        | 0.16     |
| Aspartate aminotransferase, U/L              | 454                    | 24;20-29          | 378 | 22;18-25        | <0.001   |
| Alanine aminotransferase, U/L                | 452                    | 24;18-32          | 378 | 17;13.3-23      | <0.001   |
| Gamma-glutamyltransferase, U/L               | 452                    | 24;16-35          | 377 | 15;9-23         | <0.001   |
| C-reactive protein, mg/L                     | 451                    | 0.5;0.5-2.05      | 376 | 0.5;0.5-1.9     | 0.53     |
| Hemoglobin, g/L                              | 451                    | 148;141-154       | 375 | 134;129-140     | <0.001   |
| Thrombocytes, ×10 <sup>9</sup> /L            | 449                    | 212;181-243       | 374 | 238;201-269     | <0.001   |
| Leukocytes, ×10 <sup>9</sup> /L              | 451                    | 5.6;4.7-6.55      | 374 | 5.6;4.7-6.4     | 1.00     |
| <b>Urine values</b>                          |                        |                   |     |                 |          |
| Volume day+night-time collection, mL         | 459                    | 1520;1108-2079    | 379 | 1700;1247-2242  | 0.024    |
| Volume day collection, mL                    | 459                    | 1000;703-1500     | 379 | 1135;800-1580   | 0.023    |
| Volume nighttime collection, mL              | 459                    | 450;300-632       | 379 | 496;300-700     | 0.43     |
| Collection time day+nighttime, min           | 458                    | 1440;1395-1480    | 379 | 1440;1390-1480  | 0.71     |
| Collection time day, min                     | 458                    | 960;915-1010      | 379 | 950;885-990     | <0.001   |
| Collection time nighttime, min               | 457                    | 480;435-525       | 379 | 495;450-540     | <0.001   |
| Creatinine, µmol/(day+nighttime)             | 458                    | 15465;13234-17514 | 378 | 9663;8413-11067 | <0.001   |
| Creatinine, µmol/day                         | 459                    | 9900;8332-11574   | 378 | 6263;5096-7304  | <0.001   |
| Creatinine, µmol/nighttime                   | 458                    | 5200;4444-6253    | 379 | 3350;2796-4069  | <0.001   |

The number of participants is indicated for each characteristic and sex group. Categorical variables are described by % and continuous variables by their mean±standard deviation or by their median;25<sup>th</sup>-75<sup>th</sup> percentiles. Sex-specific differences were determined by chi squared test or Mann–Whitney U test, and the corresponding *p* values are indicated.
