# Supplementary material for: Reference intervals for the urinary steroid metabolome: The impact of sex, age, day and night time on human adult steroidogenesis
Source: PubMed Central journal article supplement (PMC6440635; doi:10.1371/journal.pone.0214549), 2019-03-29
Supplement: pone.0214549.s007.pdf [file pone.0214549.s007.pdf]

**Supporting Table 3. Sex specific differences in 24 hours urinary excretion of steroid hormone metabolites.**

| Metabolite, µg/24 hours           | Men |                                           | Women |                                           | <i>p</i> |
|-----------------------------------|-----|-------------------------------------------|-------|-------------------------------------------|----------|
|                                   | N   | Median;25 <sup>th</sup> -75 <sup>th</sup> | N     | Median;25 <sup>th</sup> -75 <sup>th</sup> |          |
| 17α-OH-pregnanolone               | 451 | 173;118-247                               | 375   | 51.1;32.9-111                             | <0.001   |
| pregnanetriol                     | 395 | 676;518-920                               | 360   | 340;226-526                               | <0.001   |
| pregnenetriol                     | 448 | 193;96.2-371                              | 378   | 71.2;30.4-134                             | <0.001   |
| pregnanetriolone                  | 457 | 16.2;11.4-24.6                            | 379   | 12.2;7.7-20.2                             | <0.001   |
| pregnenediol                      | 457 | 206;145-294                               | 376   | 204;118-388                               | 0.57     |
| dehydroepiandrosterone            | 439 | 148;54.6-572                              | 377   | 55;25.1-141                               | <0.001   |
| 16α-OH-dehydroepiandrosterone     | 448 | 258;89.4-495                              | 379   | 92;44-214                                 | <0.001   |
| androstenediol                    | 453 | 118;53.3-273                              | 378   | 42.9;21.8-76.2                            | <0.001   |
| androstetriol                     | 456 | 406;236-626                               | 378   | 167;90.5-277                              | <0.001   |
| testosterone                      | 451 | 46.3;29.9-70.4                            | 367   | 7.2;4.4-13.5                              | <0.001   |
| 5α-DH-testosterone                | 456 | 24.4;15.1-36.3                            | 377   | 9.8;6.1-16.8                              | <0.001   |
| androstenediol                    | 445 | 85.1;58.7-114                             | 372   | 22.3;13.8-35.8                            | <0.001   |
| androsterone                      | 381 | 1840;1194-2719                            | 349   | 644;337-1092                              | <0.001   |
| 11β-OH-androsterone               | 447 | 861;646-1086                              | 376   | 461;339-630                               | <0.001   |
| etiocholanolone                   | 390 | 1544;1029-2362                            | 351   | 895;493-1399                              | <0.001   |
| 17β-estradiol                     | 457 | 2.4;1.8-3.2                               | 377   | 1.9;1-4.2                                 | 0.0016   |
| estriol                           | 456 | 6.2;4.4-8.8                               | 374   | 4.8;2-11.3                                | 0.0012   |
| TH-11-deoxycorticosterone         | 455 | 7.3;5.1-10.4                              | 378   | 6;3.5-10.2                                | <0.001   |
| TH-11-dehydrocorticosterone       | 452 | 105;76.9-140                              | 379   | 74.3;53.7-108                             | <0.001   |
| 18-OH-TH-11-dehydrocorticosterone | 433 | 54.4;34.1-81.2                            | 342   | 33.4;21.9-57.6                            | <0.001   |
| TH-corticosterone                 | 457 | 143;110-198                               | 379   | 112;80-151                                | <0.001   |
| 5α-TH-corticosterone              | 457 | 325;236-456                               | 379   | 178;119-257                               | <0.001   |
| TH-aldosterone                    | 456 | 20;12.6-31.5                              | 378   | 17.2;10.6-30.3                            | 0.0842   |
| TH-11-deoxycortisol               | 457 | 67;49.5-87.5                              | 379   | 51.7;38-71.4                              | <0.001   |
| cortisol                          | 457 | 110;82.5-152                              | 379   | 84.2;59.1-121                             | <0.001   |
| 6β-OH-cortisol                    | 457 | 107;72.2-147                              | 378   | 91.7;58.6-134                             | <0.001   |
| 18-OH-cortisol                    | 424 | 180;114-275                               | 344   | 173;108-249                               | 0.16     |
| 20α-DH-cortisol                   | 457 | 53.3;38.2-76.5                            | 379   | 43.7;31.7-65.7                            | <0.001   |
| TH-cortisol                       | 371 | 1766;1407-2231                            | 340   | 1167;881-1455                             | <0.001   |
| α-cortol                          | 452 | 328;255-421                               | 379   | 219;166-290                               | <0.001   |
| β-cortol                          | 453 | 456;352-622                               | 378   | 272;198-369                               | <0.001   |
| 11β-OH-etiocholanolone            | 455 | 373;199-546                               | 378   | 294;162-452                               | <0.001   |
| allo-TH-cortisol                  | 381 | 1445;1055-1986                            | 362   | 582;409-851                               | <0.001   |
| cortisone                         | 456 | 169;129-232                               | 379   | 137;96.1-188                              | <0.001   |
| 20α-DH-cortisone                  | 457 | 24.4;18.3-33.1                            | 379   | 16.7;12.3-22.5                            | <0.001   |
| 20β-DH-cortisone                  | 457 | 61.3;44.1-81.1                            | 379   | 47.7;36.2-66.6                            | <0.001   |
| TH-cortisone                      | 407 | 3091;2492-4016                            | 360   | 2006;1528-2661                            | <0.001   |
| α-cortolone                       | 426 | 1221;984-1525                             | 362   | 885;673-1153                              | <0.001   |
| β-cortolone                       | 427 | 639;507-818                               | 369   | 373;280-479                               | <0.001   |
| 11-keto-etiocholanolone           | 455 | 391;248-558                               | 379   | 342;198-455                               | <0.001   |

The available number of participants is indicated for each metabolite stratified for sex. Metabolites in the unit µg/24 hours are described by their median;25<sup>th</sup>-75<sup>th</sup> percentile. Between-group differences were determined by Mann–Whitney U test, and the corresponding *p* values are indicated.
