# Supplementary material for: Reference intervals for the urinary steroid metabolome: The impact of sex, age, day and night time on human adult steroidogenesis
Source: PubMed Central journal article supplement (PMC6440635; doi:10.1371/journal.pone.0214549), 2019-03-29
Supplement: pone.0214549.s008.pdf [file pone.0214549.s008.pdf]

**Supporting Table 4. Day and nighttime specific differences in urinary excretion of steroid hormone metabolites in men and women.**

| Metabolite, µg/hour               | Men |                                           |       |                                           |        | Women |                                           |       |                                           |        |
|-----------------------------------|-----|-------------------------------------------|-------|-------------------------------------------|--------|-------|-------------------------------------------|-------|-------------------------------------------|--------|
|                                   | Day |                                           | Night |                                           | p      | Day   |                                           | Night |                                           | p      |
|                                   | N   | Median;25 <sup>th</sup> -75 <sup>th</sup> | N     | Median;25 <sup>th</sup> -75 <sup>th</sup> |        | N     | Median;25 <sup>th</sup> -75 <sup>th</sup> | N     | Median;25 <sup>th</sup> -75 <sup>th</sup> |        |
| 17α-OH-pregnanolone               | 455 | 7.33;4.88-10.6                            | 451   | 6.91;4.7-10.2                             | 0.013  | 379   | 2.41;1.44-5                               | 375   | 1.83;1.12-4.03                            | <0.001 |
| pregnanetriol                     | 422 | 27.7;20.6-39.3                            | 410   | 28.4;19.5-39.3                            | 0.51   | 370   | 14.7;9.38-22.7                            | 365   | 14.1;9.39-21.3                            | 0.015  |
| pregnenetriol                     | 453 | 8.31;4.1-16.3                             | 449   | 7.24;3.61-13                              | <0.001 | 379   | 3.21;1.23-6.05                            | 378   | 2.51;1.05-5.08                            | <0.001 |
| pregnanetriolone                  | 456 | 0.766;0.518-1.12                          | 456   | 0.509;0.358-0.847                         | <0.001 | 379   | 0.548;0.368-0.908                         | 379   | 0.373;0.234-0.685                         | <0.001 |
| pregnane diol                     | 456 | 8.31;5.9-12.3                             | 456   | 8.16;5.49-12.8                            | 0.13   | 379   | 8.77;4.89-17.7                            | 376   | 8.01;4.76-15.4                            | 0.0018 |
| dehydroepiandrosterone            | 443 | 6.78;2.32-28.9                            | 443   | 4.71;1.94-16.5                            | <0.001 | 378   | 2.37;1.05-6.47                            | 378   | 1.85;0.83-4.45                            | <0.001 |
| 16α-OH-dehydroepiandrosterone     | 449 | 10.8;3.71-21.6                            | 449   | 8.97;3.04-20.7                            | <0.001 | 379   | 4.03;1.74-9.33                            | 379   | 3.71;1.69-7.67                            | <0.001 |
| androstenediol                    | 455 | 5.05;2.16-11.7                            | 452   | 4.84;2.13-10.1                            | <0.001 | 379   | 1.8;0.897-3.35                            | 378   | 1.6;0.884-2.94                            | <0.001 |
| androstetriol                     | 456 | 16.8;9.78-25.8                            | 455   | 16.3;9.28-26.3                            | 0.61   | 379   | 6.8;3.63-11.3                             | 378   | 7.07;3.77-11.5                            | 0.30   |
| testosterone                      | 453 | 1.85;1.17-2.86                            | 451   | 1.96;1.26-3.08                            | 0.0087 | 374   | 0.3;0.173-0.558                           | 369   | 0.291;0.173-0.526                         | 0.055  |
| 5α-DH-testosterone                | 455 | 1.03;0.61-1.5                             | 456   | 0.871;0.548-1.45                          | <0.001 | 378   | 0.43;0.261-0.744                          | 378   | 0.338;0.195-0.621                         | <0.001 |
| androstanediol                    | 449 | 3.47;2.35-4.66                            | 447   | 3.5;2.34-5.2                              | 0.18   | 375   | 0.917;0.57-1.4                            | 374   | 0.896;0.502-1.49                          | 0.0097 |
| androsterone                      | 404 | 76.7;49.4-113                             | 400   | 73.2;47.9-108                             | 0.029  | 362   | 26.9;15.2-47                              | 359   | 24.6;13.8-45.1                            | <0.001 |
| 11β-OH-androsterone               | 450 | 38.5;28.6-50.6                            | 450   | 27.6;19.9-39                              | <0.001 | 376   | 20.9;15.3-28.5                            | 378   | 15.4;10.8-21.1                            | <0.001 |
| etiocholanolone                   | 407 | 65.6;40-98.9                              | 413   | 63.3;41.8-96.1                            | 0.83   | 369   | 38.1;21.7-56.9                            | 359   | 37.5;19.6-58.4                            | 0.042  |
| 17β-estradiol                     | 456 | 0.097;0.069-0.132                         | 456   | 0.103;0.071-0.147                         | 0.0056 | 377   | 0.082;0.041-0.17                          | 379   | 0.08;0.038-0.182                          | 0.78   |
| estriol                           | 455 | 0.251;0.172-0.348                         | 456   | 0.261;0.172-0.363                         | 0.29   | 377   | 0.186;0.081-0.473                         | 375   | 0.189;0.083-0.479                         | 0.98   |
| TH-11-deoxycorticosterone         | 455 | 0.315;0.215-0.447                         | 455   | 0.272;0.181-0.385                         | <0.001 | 379   | 0.263;0.154-0.446                         | 378   | 0.225;0.13-0.408                          | <0.001 |
| TH-11-dehydrocorticosterone       | 451 | 4.74;3.26-6.34                            | 455   | 3.36;2.35-5.18                            | <0.001 | 379   | 3.38;2.31-4.82                            | 379   | 2.52;1.69-4.05                            | <0.001 |
| 18-OH-TH-11-dehydrocorticosterone | 447 | 2.31;1.49-3.49                            | 437   | 1.84;1.17-3.16                            | <0.001 | 359   | 1.49;1-2.49                               | 351   | 1.11;0.655-1.91                           | <0.001 |
| TH-corticosterone                 | 456 | 6.24;4.44-8.65                            | 456   | 5.19;3.72-7.83                            | <0.001 | 379   | 4.68;3.45-6.49                            | 379   | 4.07;2.8-6.02                             | <0.001 |
| 5α-TH-corticosterone              | 456 | 15.4;10.9-21.7                            | 456   | 9.53;6.64-13.4                            | <0.001 | 379   | 8.43;5.77-12.3                            | 379   | 5.31;3.22-7.89                            | <0.001 |
| TH-aldosterone                    | 456 | 0.828;0.506-1.44                          | 455   | 0.667;0.431-1.11                          | <0.001 | 379   | 0.769;0.47-1.32                           | 378   | 0.63;0.342-1.06                           | <0.001 |
| TH-11-deoxycortisol               | 456 | 2.99;2.18-3.82                            | 456   | 2.3;1.61-3.28                             | <0.001 | 379   | 2.29;1.64-3.22                            | 379   | 1.76;1.25-2.61                            | <0.001 |
| cortisol                          | 456 | 4.99;3.6-6.93                             | 456   | 3.82;2.64-5.58                            | <0.001 | 379   | 3.69;2.6-5.39                             | 379   | 2.8;2.04-4.05                             | <0.001 |
| 6β-OH-cortisol                    | 456 | 4.84;3.13-6.75                            | 456   | 3.58;2.22-5.37                            | <0.001 | 379   | 4.28;2.53-6.09                            | 378   | 2.95;1.8-4.61                             | <0.001 |
| 18-OH-cortisol                    | 446 | 8.08;5.05-12.8                            | 429   | 4.78;3.13-8.32                            | <0.001 | 367   | 7.84;4.88-11.1                            | 349   | 4.96;2.79-8.03                            | <0.001 |
| 20α-DH-cortisol                   | 456 | 2.4;1.69-3.51                             | 456   | 1.62;1.05-2.56                            | <0.001 | 379   | 1.98;1.39-2.9                             | 379   | 1.51;0.833-2.34                           | <0.001 |
| TH-cortisol                       | 386 | 82.6;66.5-107                             | 411   | 51.9;38-72.2                              | <0.001 | 354   | 56;41-70.2                                | 355   | 34.2;24.5-48                              | <0.001 |
| α-cortol                          | 453 | 15;11.8-19.6                              | 453   | 10.4;7.38-13.9                            | <0.001 | 379   | 10.2;7.61-13.7                            | 379   | 6.6;4.76-9.48                             | <0.001 |
| β-cortol                          | 453 | 20.6;15.6-27.9                            | 454   | 16.3;11.5-24.3                            | <0.001 | 379   | 12.2;9.31-17                              | 378   | 9.09;6.17-13.8                            | <0.001 |
| 11β-OH-etiocholanolone            | 454 | 13.7;7.62-22.5                            | 455   | 14.8;8.09-23.7                            | 0.42   | 378   | 12;6.82-19                                | 379   | 11.9;6.26-18.7                            | 0.12   |
| allo-TH-cortisol                  | 393 | 68.8;49-92.6                              | 419   | 43.6;30.3-63.2                            | <0.001 | 370   | 28.3;19.5-40.6                            | 369   | 17.3;11.6-26.9                            | <0.001 |
| cortisone                         | 456 | 7.33;5.46-10.2                            | 455   | 6.09;4.49-8.49                            | <0.001 | 379   | 6.09;4.13-8.21                            | 379   | 4.59;3.09-6.83                            | <0.001 |
| 20α-DH-cortisone                  | 456 | 1.13;0.84-1.57                            | 456   | 0.709;0.499-1.07                          | <0.001 | 379   | 0.81;0.584-1.04                           | 379   | 0.477;0.336-0.69                          | <0.001 |
| 20β-DH-cortisone                  | 456 | 2.82;2-3.86                               | 456   | 1.75;1.21-2.5                             | <0.001 | 379   | 2.24;1.61-3.02                            | 379   | 1.49;1.03-2.19                            | <0.001 |
| TH-cortisone                      | 423 | 148;113-193                               | 432   | 93.5;69.7-130                             | <0.001 | 368   | 94.6;71-125                               | 368   | 62.9;44.2-88                              | <0.001 |
| α-cortolone                       | 431 | 57.5;45.3-74                              | 444   | 35.6;26.1-47.6                            | <0.001 | 368   | 41.9;30.9-54.7                            | 370   | 26.2;19.6-37.5                            | <0.001 |
| β-cortolone                       | 433 | 29.3;22.1-38                              | 442   | 21.4;16.2-28.7                            | <0.001 | 372   | 16.6;12.7-22.6                            | 376   | 12.3;8.96-16.9                            | <0.001 |
| 11-keto-etiocholanolone           | 455 | 16;9.98-23.5                              | 455   | 15.2;9.02-22.4                            | <0.001 | 379   | 13.8;8.48-19.6                            | 379   | 12.3;7-18.8                               | <0.001 |

The available number of participants is indicated for each metabolite stratified for sex. Metabolites in the unit µg/hour are described by their median;25<sup>th</sup>-75<sup>th</sup> percentile. Within-sex differences were determined by Wilcoxon signed-rank test, and the corresponding *p* values are indicated.
