# Supplementary material for: Reference intervals for the urinary steroid metabolome: The impact of sex, age, day and night time on human adult steroidogenesis
Source: PubMed Central journal article supplement (PMC6440635; doi:10.1371/journal.pone.0214549), 2019-03-29
Supplement: pone.0214549.s009.pdf [file pone.0214549.s009.pdf]

**Supporting Table 5. Correlation between day and nighttime urinary excretion ( $\mu\text{g}/\text{hour}$ ) of steroid hormone metabolites in men and in women.**

| Men |                                        |       |                    | Women           |                                        |                           |     |
|-----|----------------------------------------|-------|--------------------|-----------------|----------------------------------------|---------------------------|-----|
| N   | Metabolite                             | Rho   | Group              | Group           | Rho                                    | Metabolite                | N   |
| 425 | $\alpha$ -cortolone                    | 0.446 | Glucocorticoids    | Glucocorticoids | 0.489                                  | 20 $\alpha$ -DH-cortisol  | 379 |
| 455 | 20 $\alpha$ -DH-cortisol               | 0.454 |                    |                 | 0.516                                  | cortisol                  | 379 |
| 455 | 6 $\beta$ -OH-cortisol                 | 0.457 |                    |                 | 0.550                                  | cortisone                 | 379 |
| 425 | $\beta$ -cortolone                     | 0.484 |                    |                 | 0.567                                  | 20 $\beta$ -DH-cortisone  | 379 |
| 369 | TH-cortisol                            | 0.492 |                    |                 | 0.577                                  | $\alpha$ -cortolone       | 362 |
| 405 | TH-cortisone                           | 0.495 |                    |                 | 0.581                                  | 6 $\beta$ -OH-cortisol    | 378 |
| 454 | cortisone                              | 0.502 |                    |                 | 0.598                                  | TH-cortisol               | 340 |
| 455 | 20 $\beta$ -DH-cortisone               | 0.522 |                    |                 | 0.609                                  | TH-cortisone              | 360 |
| 455 | 20 $\alpha$ -DH-cortisone              | 0.523 |                    |                 | 0.614                                  | 20 $\alpha$ -DH-cortisone | 379 |
| 450 | $\alpha$ -cortol                       | 0.526 |                    |                 | 0.619                                  | $\beta$ -cortolone        | 369 |
| 455 | 17 $\beta$ -estradiol                  | 0.534 | Androgens          | 0.624           | $\alpha$ -cortol                       | 379                       |     |
| 445 | 11 $\beta$ -OH-androsterone            | 0.540 |                    | 0.625           | TH-corticosterone                      | 379                       |     |
| 422 | 18-OH-cortisol                         | 0.551 | Corticosterones    | 0.625           | 18-OH-cortisol                         | 344                       |     |
| 455 | cortisol                               | 0.563 |                    | 0.661           | TH-11-deoxycortisol                    | 379                       |     |
| 455 | 5 $\alpha$ -TH-corticosterone          | 0.573 | Corticosterones    | 0.664           | 11 $\beta$ -OH-androsterone            | 376                       |     |
| 455 | TH-corticosterone                      | 0.597 |                    | 0.668           | 18-OH-TH-11-dehydrocorticosterone      | 342                       |     |
| 450 | TH-11-dehydrocorticosterone            | 0.599 | Corticosterones    | 0.677           | TH-11-dehydrocorticosterone            | 379                       |     |
| 451 | $\beta$ -cortol                        | 0.608 |                    | 0.677           | $\beta$ -cortol                        | 378                       |     |
| 455 | TH-11-deoxycortisol                    | 0.614 | Mineralocorticoids | 0.684           | 5 $\alpha$ -TH-corticosterone          | 379                       |     |
| 379 | 5 $\alpha$ -TH-cortisol                | 0.645 |                    | 0.739           | TH-aldosterone                         | 378                       |     |
| 453 | TH-11-deoxycorticosterone              | 0.653 | Androgens          | 0.753           | androstanediol                         | 372                       |     |
| 454 | estriol                                | 0.654 |                    | 0.756           | 11-keto-etiocholanolone                | 379                       |     |
| 443 | androstanediol                         | 0.669 | Glucocorticoids    | 0.770           | 11 $\beta$ -OH-etiocholanolone         | 378                       |     |
| 431 | 18-OH-TH-11-dehydrocorticosterone      | 0.673 |                    | 0.784           | 5 $\alpha$ -TH-cortisol                | 632                       |     |
| 394 | pregnanetriol                          | 0.677 | Androgens          | 0.789           | 5 $\alpha$ -DH-testosterone            | 377                       |     |
| 454 | TH-aldosterone                         | 0.691 |                    | 0.795           | testosterone                           | 367                       |     |
| 453 | 11-keto-etiocholanolone                | 0.721 | Progesterones      | 0.824           | pregnanetriolone                       | 379                       |     |
| 455 | pregnanediol                           | 0.723 |                    | 0.850           | pregnanetriol                          | 360                       |     |
| 454 | 5 $\alpha$ -DH-testosterone            | 0.733 | Corticosterones    | 0.851           | TH-11-deoxycorticosterone              | 378                       |     |
| 449 | 17 $\alpha$ -OH-pregnanolone           | 0.741 |                    | 0.860           | 17 $\beta$ -estradiol                  | 377                       |     |
| 453 | 11 $\beta$ -OH-etiocholanolone         | 0.741 | Androgens          | 0.861           | androstenediol                         | 378                       |     |
| 455 | pregnanetriolone                       | 0.742 |                    | 0.869           | etiocholanolone                        | 351                       |     |
| 449 | testosterone                           | 0.744 | Androgens          | 0.870           | dehydroepiandrosterone                 | 377                       |     |
| 388 | etiocholanolone                        | 0.774 |                    | 0.879           | pregnenetriol                          | 378                       |     |
| 379 | androsterone                           | 0.781 | Androgens          | 0.881           | androstenetriol                        | 378                       |     |
| 454 | androstenetriol                        | 0.828 |                    | 0.887           | 17 $\alpha$ -OH-pregnanolone           | 375                       |     |
| 446 | 16 $\alpha$ -OH-dehydroepiandrosterone | 0.863 | Progesterones      | 0.889           | pregnanediol                           | 376                       |     |
| 446 | pregnenetriol                          | 0.866 |                    | 0.891           | 16 $\alpha$ -OH-dehydroepiandrosterone | 379                       |     |
| 451 | androstenediol                         | 0.893 | Estrogens          | 0.891           | estriol                                | 374                       |     |
| 437 | dehydroepiandrosterone                 | 0.908 |                    | 0.896           | androsterone                           | 349                       |     |

**Color code for steroid groups:**

- Progesterones
- Androgens
- Estrogens
- Corticosterones
- Mineralocorticoids
- Glucocorticoids

The available number of participants is indicated for each metabolite stratified for sex. The correlation between day and nighttime excretion values was assessed by Spearman's rank correlation coefficient  $\rho$  (rho). Rho values were ranked in ascending order within each sex group. Metabolites were colored by steroid groups as indicated.
